# Supplementary material for: Feature extraction and pattern recognition of gas pipeline flow noise signals in a strong noisy background
Source: PeerJ journal article supplement (doi:10.7717/peerj-cs.2087), 2024-07-05
Supplement: data.zip [file data.zip]

## Sheet: Sheet1
0.41212	163.363	0.41203	170.84	0.41212	163.438	0.41203	170.846	0.41203	168.259	0.41203	168.258	0.41203	168.257	0.41203	168.259	0.41203	181.198	0.41212	163.828	0.41203	163.863	0.41212	163.907	0.41203	163.847	0.41212	160.862	0.41203	163.075	0.41212	163.912
0.82423	148.026	0.82406	155.513	0.82423	148.101	0.82406	155.519	0.82406	152.937	0.82406	152.936	0.82406	152.936	0.82406	152.937	0.82406	165.866	0.82423	148.493	0.82406	148.543	0.82423	148.572	0.82406	148.526	0.82423	145.531	0.82406	147.756	0.82423	148.576
1.23635	152.871	1.23609	160.348	1.23635	152.946	1.23609	160.355	1.23609	157.767	1.23609	157.766	1.23609	157.765	1.23609	157.767	1.23609	170.708	1.23635	153.337	1.23609	153.37	1.23635	153.416	1.23609	153.354	1.23635	150.37	1.23609	152.582	1.23635	153.421
1.64846	147.631	1.64813	155.118	1.64846	147.706	1.64813	155.125	1.64813	152.543	1.64813	152.541	1.64813	152.541	1.64813	152.543	1.64813	165.471	1.64846	148.097	1.64813	148.148	1.64846	148.177	1.64813	148.132	1.64846	145.135	1.64813	147.361	1.64846	148.181
2.06058	146.277	2.06016	153.754	2.06058	146.353	2.06016	153.761	2.06016	151.171	2.06016	151.17	2.06016	151.169	2.06016	151.171	2.06016	164.116	2.06058	146.742	2.06016	146.774	2.06058	146.822	2.06016	146.757	2.06058	143.773	2.06016	145.985	2.06058	146.826
2.4727	146.954	2.47219	154.443	2.4727	147.028	2.47219	154.449	2.47219	151.867	2.47219	151.866	2.47219	151.865	2.47219	151.866	2.47219	164.796	2.4727	147.421	2.47219	147.471	2.4727	147.499	2.47219	147.456	2.4727	144.459	2.47219	146.684	2.4727	147.504
2.88481	139.114	2.88422	146.593	2.88481	139.188	2.88422	146.599	2.88422	144.004	2.88422	144.004	2.88422	144.001	2.88422	144.004	2.88422	156.961	2.88481	139.578	2.88422	139.604	2.88481	139.656	2.88422	139.589	2.88481	136.604	2.88422	138.814	2.88481	139.661
3.29693	145.965	3.29625	153.456	3.29693	146.04	3.29625	153.463	3.29625	150.879	3.29625	150.878	3.29625	150.878	3.29625	150.879	3.29625	163.809	3.29693	146.431	3.29625	146.484	3.29693	146.51	3.29625	146.468	3.29693	143.468	3.29625	145.697	3.29693	146.515
3.70905	127.955	3.70828	135.508	3.70905	128.031	3.70828	135.515	3.70828	132.922	3.70828	132.92	3.70828	132.922	3.70828	132.921	3.70828	145.878	3.70905	128.417	3.70828	128.525	3.70905	128.495	3.70828	128.508	3.70905	125.442	3.70828	127.737	3.70905	128.501
4.12116	144.615	4.12031	152.109	4.12116	144.69	4.12031	152.116	4.12031	149.532	4.12031	149.531	4.12031	149.53	4.12031	149.531	4.12031	162.464	4.12116	145.081	4.12031	145.136	4.12116	145.16	4.12031	145.12	4.12116	142.117	4.12031	144.349	4.12116	145.165
4.53328	132.475	4.53234	140.006	4.53328	132.55	4.53234	140.015	4.53234	137.455	4.53234	137.451	4.53234	137.453	4.53234	137.454	4.53234	150.332	4.53328	132.946	4.53234	133.067	4.53328	133.026	4.53234	133.05	4.53328	130.005	4.53234	132.286	4.53328	133.03
4.94539	142.821	4.94438	150.32	4.94539	142.896	4.94438	150.327	4.94438	147.742	4.94438	147.74	4.94438	147.74	4.94438	147.741	4.94438	160.676	4.94539	143.287	4.94438	143.346	4.94539	143.366	4.94438	143.33	4.94539	140.322	4.94438	142.558	4.94539	143.37
5.35751	137.38	5.35641	144.886	5.35751	137.455	5.35641	144.892	5.35641	142.321	5.35641	142.32	5.35641	142.32	5.35641	142.321	5.35641	155.226	5.35751	137.849	5.35641	137.931	5.35751	137.927	5.35641	137.913	5.35751	134.898	5.35641	137.146	5.35751	137.932
5.76963	140.449	5.76844	147.957	5.76963	140.524	5.76844	147.964	5.76844	145.377	5.76844	145.376	5.76844	145.375	5.76844	145.377	5.76844	158.316	5.76963	140.914	5.76844	140.98	5.76963	140.994	5.76844	140.964	5.76963	137.948	5.76844	140.193	5.76963	140.998
6.18174	139.554	6.18047	147.056	6.18174	139.628	6.18047	147.062	6.18047	144.487	6.18047	144.486	6.18047	144.485	6.18047	144.486	6.18047	157.401	6.18174	140.022	6.18047	140.094	6.18174	140.1	6.18047	140.078	6.18174	137.066	6.18047	139.309	6.18174	140.105
6.59386	137.285	6.5925	144.81	6.59386	137.359	6.5925	144.815	6.5925	142.228	6.5925	142.227	6.5925	142.225	6.5925	142.226	6.5925	155.171	6.59386	137.75	6.5925	137.83	6.59386	137.827	6.5925	137.815	6.59386	134.781	6.5925	137.042	6.59386	137.832
7.00598	140.492	7.00453	147.995	7.00598	140.567	7.00453	148.002	7.00453	145.423	7.00453	145.422	7.00453	145.422	7.00453	145.424	7.00453	158.343	7.00598	140.959	7.00453	141.031	7.00598	141.039	7.00453	141.013	7.00598	138.001	7.00453	140.245	7.00598	141.044
7.41809	133.184	7.41656	140.746	7.41809	133.259	7.41656	140.752	7.41656	138.165	7.41656	138.164	7.41656	138.163	7.41656	138.164	7.41656	151.109	7.41809	133.649	7.41656	133.768	7.41809	133.728	7.41656	133.752	7.41809	130.682	7.41656	132.98	7.41809	133.732
7.83021	140.655	7.8286	148.162	7.83021	140.73	7.8286	148.168	7.8286	145.588	7.8286	145.587	7.8286	145.587	7.8286	145.588	7.8286	158.511	7.83021	141.122	7.8286	141.194	7.83021	141.201	7.8286	141.177	7.83021	138.163	7.8286	140.408	7.83021	141.206
8.24232	130.095	8.24063	137.684	8.24232	130.165	8.24063	137.687	8.24063	135.12	8.24063	135.117	8.24063	135.114	8.24063	135.115	8.24063	148.025	8.24232	130.563	8.24063	130.725	8.24232	130.638	8.24063	130.712	8.24232	127.612	8.24063	129.941	8.24232	130.643
8.65444	140.216	8.65266	147.728	8.65444	140.291	8.65266	147.735	8.65266	145.153	8.65266	145.152	8.65266	145.151	8.65266	145.153	8.65266	158.08	8.65444	140.683	8.65266	140.758	8.65444	140.762	8.65266	140.742	8.65444	137.721	8.65266	139.971	8.65444	140.766
9.06656	132.059	9.06469	139.587	9.06656	132.137	9.06469	139.595	9.06469	137.03	9.06469	137.029	9.06469	137.031	9.06469	137.031	9.06469	149.917	9.06656	132.531	9.06469	132.645	9.06656	132.61	9.06469	132.625	9.06656	129.588	9.06469	131.862	9.06656	132.615
9.47867	139.223	9.47672	146.744	9.47867	139.299	9.47672	146.75	9.47672	144.166	9.47672	144.166	9.47672	144.166	9.47672	144.167	9.47672	157.098	9.47867	139.69	9.47672	139.773	9.47867	139.769	9.47672	139.755	9.47867	136.726	9.47672	138.985	9.47867	139.773
9.89079	134.935	9.88875	142.436	9.89079	135.009	9.88875	142.442	9.88875	139.874	9.88875	139.872	9.88875	139.872	9.88875	139.873	9.88875	152.771	9.89079	135.404	9.88875	135.483	9.89079	135.482	9.88875	135.467	9.89079	132.456	9.88875	134.699	9.89079	135.487
10.3029	137.669	10.3008	145.202	10.3029	137.744	10.3008	145.208	10.3008	142.624	10.3008	142.622	10.3008	142.621	10.3008	142.623	10.3008	155.558	10.3029	138.135	10.3008	138.227	10.3029	138.214	10.3008	138.212	10.3029	135.169	10.3008	137.44	10.3029	138.218
10.715	136.834	10.7128	144.332	10.715	136.908	10.7128	144.336	10.7128	141.764	10.7128	141.764	10.7128	141.762	10.7128	141.762	10.7128	154.671	10.715	137.303	10.7128	137.372	10.715	137.38	10.7128	137.356	10.715	134.35	10.7128	136.587	10.715	137.384
11.1271	135.527	11.1249	143.078	11.1271	135.602	11.1249	143.086	11.1249	140.498	11.1249	140.497	11.1249	140.498	11.1249	140.499	11.1249	153.436	11.1271	135.992	11.1249	136.103	11.1271	136.072	11.1249	136.086	11.1271	133.025	11.1249	135.315	11.1271	136.077
11.5392	137.891	11.5369	145.39	11.5392	137.966	11.5369	145.396	11.5369	142.82	11.5369	142.819	11.5369	142.819	11.5369	142.819	11.5369	155.735	11.5392	138.359	11.5369	138.428	11.5392	138.437	11.5369	138.411	11.5392	135.403	11.5369	137.642	11.5392	138.442
11.9514	132.955	11.9489	140.528	11.9514	133.029	11.9489	140.534	11.9489	137.95	11.9489	137.948	11.9489	137.948	11.9489	137.949	11.9489	150.885	11.9514	133.42	11.9489	133.553	11.9514	133.498	11.9489	133.538	11.9514	130.455	11.9489	132.766	11.9514	133.503
12.3635	138.293	12.3609	145.798	12.3635	138.368	12.3609	145.804	12.3609	143.225	12.3609	143.224	12.3609	143.224	12.3609	143.225	12.3609	156.146	12.3635	138.761	12.3609	138.832	12.3635	138.839	12.3609	138.815	12.3635	135.802	12.3609	138.045	12.3635	138.844
12.7756	130.981	12.773	138.55	12.7756	131.055	12.773	138.557	12.773	135.98	12.773	135.978	12.773	135.978	12.773	135.979	12.773	148.897	12.7756	131.448	12.773	131.587	12.7756	131.527	12.773	131.57	12.7756	128.49	12.773	130.801	12.7756	131.531
13.1877	138.148	13.185	145.659	13.1877	138.223	13.185	145.666	13.185	143.084	13.185	143.083	13.185	143.083	13.185	143.084	13.185	156.01	13.1877	138.614	13.185	138.69	13.1877	138.693	13.185	138.673	13.1877	135.653	13.185	137.903	13.1877	138.698
13.5998	131.343	13.597	138.861	13.5998	131.417	13.597	138.866	13.597	136.298	13.597	136.297	13.597	136.296	13.597	136.297	13.597	149.199	13.5998	131.813	13.597	131.908	13.5998	131.89	13.597	131.891	13.5998	128.864	13.597	131.124	13.5998	131.895
14.012	137.496	14.0091	145.017	14.012	137.571	14.0091	145.023	14.0091	142.44	14.0091	142.439	14.0091	142.438	14.0091	142.439	14.0091	155.372	14.012	137.962	14.0091	138.045	14.012	138.041	14.0091	138.028	14.012	134.999	14.0091	137.257	14.012	138.046
14.4241	133.146	14.4211	140.631	14.4241	133.222	14.4211	140.637	14.4211	138.068	14.4211	138.066	14.4211	138.067	14.4211	138.067	14.4211	150.968	14.4241	133.616	14.4211	133.678	14.4241	133.695	14.4211	133.661	14.4241	130.666	14.4211	132.894	14.4241	133.699
14.8362	136.347	14.8331	143.88	14.8362	136.422	14.8331	143.886	14.8331	141.301	14.8331	141.3	14.8331	141.299	14.8331	141.3	14.8331	154.238	14.8362	136.813	14.8331	136.905	14.8362	136.892	14.8331	136.888	14.8362	133.847	14.8331	136.117	14.8362	136.896
15.2483	134.8	15.2452	142.277	15.2483	134.875	15.2452	142.285	15.2452	139.711	15.2452	139.709	15.2452	139.71	15.2452	139.711	15.2452	152.62	15.2483	135.268	15.2452	135.32	15.2483	135.347	15.2452	135.303	15.2483	132.315	15.2452	134.535	15.2483	135.352
15.6604	134.709	15.6572	142.257	15.6604	134.784	15.6572	142.263	15.6572	139.676	15.6572	139.674	15.6572	139.674	15.6572	139.675	15.6572	152.617	15.6604	135.174	15.6572	135.278	15.6604	135.253	15.6572	135.263	15.6604	132.207	15.6572	134.49	15.6604	135.257
16.0725	135.897	16.0692	143.378	16.0725	135.972	16.0692	143.385	16.0692	140.808	16.0692	140.807	16.0692	140.807	16.0692	140.808	16.0692	153.725	16.0725	136.365	16.0692	136.415	16.0725	136.444	16.0692	136.399	16.0725	133.409	16.0692	135.63	16.0725	136.449
16.4846	132.69	16.4812	140.251	16.4846	132.764	16.4812	140.256	16.4812	137.669	16.4812	137.668	16.4812	137.666	16.4812	137.667	16.4812	150.614	16.4846	133.155	16.4812	133.271	16.4846	133.233	16.4812	133.256	16.4846	130.187	16.4812	132.482	16.4846	133.237
16.8968	136.44	16.8933	143.927	16.8968	136.515	16.8933	143.934	16.8933	141.354	16.8933	141.353	16.8933	141.353	16.8933	141.355	16.8933	154.278	16.8968	136.907	16.8933	136.961	16.8968	136.986	16.8933	136.944	16.8968	133.947	16.8933	136.175	16.8968	136.991
17.3089	130.826	17.3053	138.378	17.3089	130.901	17.3053	138.385	17.3053	135.799	17.3053	135.798	17.3053	135.798	17.3053	135.799	17.3053	148.734	17.3089	131.291	17.3053	131.404	17.3089	131.371	17.3053	131.387	17.3089	128.326	17.3053	130.616	17.3089	131.375
17.721	136.477	17.7173	143.973	17.721	136.553	17.7173	143.979	17.7173	141.397	17.7173	141.396	17.7173	141.396	17.7173	141.396	17.7173	154.327	17.721	136.944	17.7173	137.002	17.721	137.022	17.7173	136.986	17.721	133.982	17.7173	136.216	17.721	137.027
18.1331	130.279	18.1294	137.782	18.1331	130.354	18.1294	137.786	18.1294	135.21	18.1294	135.21	18.1294	135.209	18.1294	135.208	18.1294	148.124	18.1331	130.748	18.1294	130.817	18.1331	130.824	18.1294	130.801	18.1331	127.791	18.1294	130.031	18.1331	130.828
18.5452	136.039	18.5414	143.545	18.5452	136.114	18.5414	143.551	18.5414	140.966	18.5414	140.965	18.5414	140.965	18.5414	140.966	18.5414	153.902	18.5452	136.505	18.5414	136.57	18.5452	136.584	18.5414	136.554	18.5452	133.54	18.5414	135.783	18.5452	136.589
18.9574	131.295	18.9534	138.752	18.9574	131.369	18.9534	138.758	18.9534	136.185	18.9534	136.184	18.9534	136.183	18.9534	136.184	18.9534	149.094	18.9574	131.763	18.9534	131.793	18.9574	131.842	18.9534	131.777	18.9574	128.81	18.9534	131.008	18.9574	131.846
19.3695	135.133	19.3655	142.65	19.3695	135.208	19.3655	142.655	19.3655	140.068	19.3655	140.067	19.3655	140.066	19.3655	140.067	19.3655	153.011	19.3695	135.598	19.3655	135.67	19.3695	135.676	19.3655	135.654	19.3695	132.63	19.3655	134.882	19.3695	135.681
19.7816	132.727	19.7775	140.171	19.7816	132.802	19.7775	140.179	19.7775	137.604	19.7775	137.602	19.7775	137.602	19.7775	137.604	19.7775	150.514	19.7816	133.195	19.7775	133.212	19.7816	133.275	19.7775	133.195	19.7816	130.24	19.7775	132.426	19.7816	133.279
20.1937	133.758	20.1895	141.287	20.1937	133.833	20.1895	141.294	20.1895	138.702	20.1895	138.7	20.1895	138.701	20.1895	138.702	20.1895	151.651	20.1937	134.221	20.1895	134.304	20.1937	134.301	20.1895	134.287	20.1937	131.25	20.1895	133.515	20.1937	134.306
20.6058	133.86	20.6016	141.309	20.6058	133.935	20.6016	141.315	20.6016	138.738	20.6016	138.736	20.6016	138.736	20.6016	138.737	20.6016	151.657	20.6058	134.328	20.6016	134.344	20.6058	134.406	20.6016	134.328	20.6058	131.37	20.6016	133.558	20.6058	134.411
21.0179	131.963	21.0136	139.501	21.0179	132.038	21.0136	139.507	21.0136	136.914	21.0136	136.912	21.0136	136.911	21.0136	136.912	21.0136	149.871	21.0179	132.426	21.0136	132.513	21.0179	132.504	21.0136	132.498	21.0179	129.452	21.0136	131.724	21.0179	132.509
21.43	134.524	21.4256	141.98	21.43	134.598	21.4256	141.987	21.4256	139.406	21.4256	139.404	21.4256	139.404	21.4256	139.406	21.4256	152.332	21.43	134.989	21.4256	135.011	21.43	135.07	21.4256	134.995	21.43	132.028	21.4256	134.224	21.43	135.074
21.8422	130.027	21.8377	137.556	21.8422	130.103	21.8377	137.563	21.8377	134.968	21.8377	134.966	21.8377	134.967	21.8377	134.968	21.8377	147.927	21.8422	130.489	21.8377	130.569	21.8422	130.569	21.8377	130.552	21.8422	127.515	21.8377	129.779	21.8422	130.574
22.2543	134.707	22.2497	142.174	22.2543	134.781	22.2497	142.18	22.2497	139.595	22.2497	139.594	22.2497	139.593	22.2497	139.595	22.2497	152.531	22.2543	135.173	22.2497	135.199	22.2543	135.251	22.2497	135.183	22.2543	132.208	22.2497	134.411	22.2543	135.256
22.6664	128.799	22.6617	136.277	22.6664	128.874	22.6617	136.282	22.6617	133.695	22.6617	133.693	22.6617	133.692	22.6617	133.693	22.6617	146.641	22.6664	129.264	22.6617	129.297	22.6664	129.342	22.6617	129.281	22.6664	126.296	22.6617	128.508	22.6664	129.346
23.0785	134.424	23.0738	141.901	23.0785	134.499	23.0738	141.908	23.0738	139.319	23.0738	139.318	23.0738	139.318	23.0738	139.32	23.0738	152.264	23.0785	134.888	23.0738	134.922	23.0785	134.968	23.0738	134.906	23.0785	131.92	23.0738	134.134	23.0785	134.973
23.4906	129.092	23.4858	136.508	23.4906	129.168	23.4858	136.513	23.4858	133.934	23.4858	133.933	23.4858	133.932	23.4858	133.932	23.4858	146.858	23.4906	129.56	23.4858	129.54	23.4906	129.637	23.4858	129.523	23.4906	126.6	23.4858	128.753	23.4906	129.641
23.9027	133.675	23.8978	141.163	23.9027	133.75	23.8978	141.169	23.8978	138.577	23.8978	138.576	23.8978	138.575	23.8978	138.576	23.8978	151.531	23.9027	134.139	23.8978	134.178	23.9027	134.217	23.8978	134.163	23.9027	131.166	23.8978	133.389	23.9027	134.222
24.3149	130.312	24.3099	137.706	24.3149	130.387	24.3099	137.712	24.3099	135.134	24.3099	135.132	24.3099	135.132	24.3099	135.133	24.3099	148.055	24.3149	130.779	24.3099	130.74	24.3149	130.858	24.3099	130.724	24.3149	127.821	24.3099	129.954	24.3149	130.862
24.727	132.445	24.7219	139.944	24.727	132.52	24.7219	139.951	24.7219	137.354	24.7219	137.352	24.7219	137.351	24.7219	137.353	24.7219	150.318	24.727	132.907	24.7219	132.952	24.727	132.987	24.7219	132.937	24.727	129.93	24.7219	132.162	24.727	132.991
25.1391	131.508	25.1339	138.906	25.1391	131.584	25.1339	138.915	25.1339	136.333	25.1339	136.331	25.1339	136.332	25.1339	136.334	25.1339	149.26	25.1391	131.974	25.1339	131.939	25.1391	132.055	25.1339	131.922	25.1391	129.014	25.1339	131.153	25.1391	132.06
25.5512	130.732	25.5459	138.239	25.5512	130.808	25.5459	138.245	25.5459	135.642	25.5459	135.642	25.5459	135.641	25.5459	135.642	25.5459	148.616	25.5512	131.194	25.5459	131.241	25.5512	131.272	25.5459	131.224	25.5512	128.211	25.5459	130.449	25.5512	131.277
25.9633	132.307	25.958	139.717	25.9633	132.381	25.958	139.723	25.958	137.14	25.958	137.138	25.958	137.137	25.958	137.138	25.958	150.074	25.9633	132.772	25.958	132.743	25.9633	132.85	25.958	132.727	25.9633	129.807	25.958	131.956	25.9633	132.855
26.3754	128.65	26.37	136.147	26.3754	128.726	26.37	136.151	26.37	133.545	26.37	133.545	26.37	133.544	26.37	133.544	26.37	146.533	26.3754	129.11	26.37	129.142	26.3754	129.188	26.37	129.126	26.3754	126.123	26.37	128.349	26.3754	129.192
26.7875	132.629	26.782	140.052	26.7875	132.704	26.782	140.059	26.782	137.471	26.782	137.469	26.782	137.468	26.782	137.47	26.782	150.415	26.7875	133.093	26.782	133.073	26.7875	133.173	26.782	133.057	26.7875	130.125	26.782	132.285	26.7875	133.178
27.1997	126.777	27.1941	134.216	27.1997	126.851	27.1941	134.221	27.1941	131.617	27.1941	131.615	27.1941	131.614	27.1941	131.614	27.1941	144.602	27.1997	127.236	27.1941	127.212	27.1997	127.314	27.1941	127.198	27.1997	124.251	27.1941	126.42	27.1997	127.319
27.6118	132.472	27.6061	139.907	27.6118	132.547	27.6061	139.914	27.6061	137.321	27.6061	137.319	27.6061	137.319	27.6061	137.321	27.6061	150.275	27.6118	132.935	27.6061	132.922	27.6118	133.015	27.6061	132.905	27.6118	129.962	27.6061	132.132	27.6118	133.02
28.0239	126.285	28.0181	133.634	28.0239	126.362	28.0181	133.642	28.0181	131.046	28.0181	131.044	28.0181	131.046	28.0181	131.047	28.0181	144.01	28.0239	126.748	28.0181	126.648	28.0239	126.829	28.0181	126.631	28.0239	123.774	28.0181	125.859	28.0239	126.833
28.436	131.828	28.4302	139.275	28.436	131.904	28.4302	139.281	28.4302	136.682	28.4302	136.681	28.4302	136.681	28.4302	136.681	28.4302	149.65	28.436	132.291	28.4302	132.282	28.436	132.369	28.4302	132.265	28.436	129.312	28.4302	131.491	28.436	132.374
28.8481	127.297	28.8422	134.611	28.8481	127.372	28.8422	134.616	28.8422	132.032	28.8422	132.031	28.8422	132.029	28.8422	132.03	28.8422	144.972	28.8481	127.763	28.8422	127.635	28.8481	127.841	28.8422	127.619	28.8481	124.798	28.8422	126.847	28.8481	127.845
29.2602	130.668	29.2542	138.123	29.2602	130.744	29.2542	138.131	29.2542	135.524	29.2542	135.523	29.2542	135.523	29.2542	135.525	29.2542	148.507	29.2602	131.128	29.2542	131.121	29.2602	131.209	29.2542	131.105	29.2602	128.143	29.2542	130.329	29.2602	131.213
29.6724	128.637	29.6663	135.962	29.6724	128.713	29.6663	135.969	29.6663	133.384	29.6663	133.382	29.6663	133.383	29.6663	133.384	29.6663	146.32	29.6724	129.102	29.6663	128.989	29.6724	129.182	29.6663	128.972	29.6724	126.138	29.6663	128.201	29.6724	129.187
30.0845	128.937	30.0783	136.397	30.0845	129.011	30.0783	136.401	30.0783	133.789	30.0783	133.788	30.0783	133.785	30.0783	133.786	30.0783	146.79	30.0845	129.395	30.0783	129.381	30.0845	129.472	30.0783	129.367	30.0845	126.401	30.0783	128.587	30.0845	129.477
30.4966	129.631	30.4903	136.976	30.4966	129.705	30.4903	136.984	30.4903	134.395	30.4903	134.392	30.4903	134.393	30.4903	134.395	30.4903	147.341	30.4966	130.094	30.4903	129.997	30.4966	130.175	30.4903	129.981	30.4966	127.126	30.4903	129.209	30.4966	130.179
30.9087	126.612	30.9023	134.059	30.9087	126.687	30.9023	134.065	30.9023	131.44	30.9023	131.439	30.9023	131.438	30.9023	131.439	30.9023	144.468	30.9087	127.067	30.9023	127.029	30.9087	127.146	30.9023	127.015	30.9087	124.063	30.9023	126.233	30.9087	127.151
31.3208	130.111	31.3144	137.476	31.3208	130.187	31.3144	137.482	31.3144	134.888	31.3144	134.887	31.3144	134.887	31.3144	134.888	31.3144	147.845	31.3208	130.575	31.3144	130.489	31.3208	130.654	31.3144	130.473	31.3208	127.601	31.3144	129.7	31.3208	130.658
31.7329	123.967	31.7264	131.344	31.7329	124.044	31.7264	131.35	31.7264	128.716	31.7264	128.715	31.7264	128.715	31.7264	128.715	31.7264	141.762	31.7329	124.42	31.7264	124.303	31.7329	124.5	31.7264	124.288	31.7329	121.408	31.7264	123.505	31.7329	124.504
32.1451	130.065	32.1384	137.443	32.1451	130.14	32.1384	137.45	32.1384	134.849	32.1384	134.848	32.1384	134.847	32.1384	134.849	32.1384	147.819	32.1451	130.526	32.1384	130.447	32.1451	130.606	32.1384	130.432	32.1451	127.547	32.1384	129.656	32.1451	130.61
32.5572	122.431	32.5505	129.658	32.5572	122.506	32.5505	129.663	32.5505	127.044	32.5505	127.042	32.5505	127.041	32.5505	127.041	32.5505	140.064	32.5572	122.887	32.5505	122.634	32.5572	122.965	32.5505	122.621	32.5572	119.889	32.5505	121.839	32.5572	122.97
32.9693	129.479	32.9625	136.866	32.9693	129.554	32.9625	136.874	32.9625	134.266	32.9625	134.264	32.9625	134.264	32.9625	134.266	32.9625	147.252	32.9693	129.938	32.9625	129.862	32.9693	130.019	32.9625	129.846	32.9693	126.951	32.9625	129.069	32.9693	130.024
33.3814	123.33	33.3745	130.507	33.3814	123.404	33.3745	130.514	33.3745	127.921	33.3745	127.918	33.3745	127.918	33.3745	127.919	33.3745	140.884	33.3814	123.791	33.3745	123.521	33.3814	123.871	33.3745	123.506	33.3814	120.817	33.3745	122.731	33.3814	123.875
33.7935	128.308	33.7866	135.702	33.7935	128.384	33.7866	135.708	33.7866	133.091	33.7866	133.09	33.7866	133.089	33.7866	133.09	33.7866	146.101	33.7935	128.766	33.7866	128.683	33.7935	128.845	33.7866	128.668	33.7935	125.769	33.7866	127.888	33.7935	128.849
34.2056	125.081	34.1986	132.306	34.2056	125.157	34.1986	132.315	34.1986	129.727	34.1986	129.724	34.1986	129.726	34.1986	129.727	34.1986	142.667	34.2056	125.544	34.1986	125.331	34.2056	125.626	34.1986	125.314	34.2056	122.576	34.1986	124.542	34.2056	125.63
34.6178	126.443	34.6106	133.832	34.6178	126.521	34.6106	133.843	34.6106	131.208	34.6106	131.206	34.6106	131.209	34.6106	131.211	34.6106	144.251	34.6178	126.895	34.6106	126.798	34.6178	126.979	34.6106	126.781	34.6178	123.885	34.6106	126.001	34.6178	126.984
35.0299	126.421	35.0227	133.693	35.0299	126.496	35.0227	133.697	35.0227	131.107	35.0227	131.107	35.0227	131.105	35.0227	131.104	35.0227	144.058	35.0299	126.885	35.0227	126.708	35.0299	126.961	35.0227	126.693	35.0299	123.913	35.0227	125.919	35.0299	126.966
35.442	123.685	35.4347	131.05	35.442	123.764	35.4347	131.059	35.4347	128.403	35.4347	128.402	35.4347	128.404	35.4347	128.405	35.4347	141.499	35.442	124.133	35.4347	123.985	35.442	124.216	35.4347	123.968	35.442	121.101	35.4347	123.183	35.442	124.221
35.8541	127.106	35.8467	134.405	35.8541	127.179	35.8467	134.41	35.8467	131.813	35.8467	131.811	35.8467	131.809	35.8467	131.81	35.8467	144.78	35.8541	127.567	35.8467	127.41	35.8541	127.645	35.8467	127.396	35.8541	124.588	35.8467	126.619	35.8541	127.649
36.2662	119.828	36.2588	127.078	36.2662	119.905	36.2588	127.082	36.2588	124.395	36.2588	124.394	36.2588	124.393	36.2588	124.392	36.2588	137.568	36.2662	120.266	36.2588	119.962	36.2662	120.345	36.2588	119.95	36.2662	117.201	36.2588	119.151	36.2662	120.35
36.6784	127.148	36.6708	134.464	36.6784	127.224	36.6708	134.47	36.6708	131.862	36.6708	131.861	36.6708	131.86	36.6708	131.861	36.6708	144.846	36.6784	127.608	36.6708	127.457	36.6784	127.687	36.6708	127.442	36.6784	124.621	36.6708	126.665	36.6784	127.692
37.0905	116.4	37.0828	123.323	37.0905	116.476	37.0828	123.33	37.0828	120.652	37.0828	120.649	37.0828	120.65	37.0828	120.651	37.0828	133.803	37.0905	116.839	37.0828	116.223	37.0905	116.922	37.0828	116.211	37.0905	113.789	37.0828	115.416	37.0905	116.926
37.5026	126.546	37.4948	133.865	37.5026	126.621	37.4948	133.873	37.4948	131.253	37.4948	131.251	37.4948	131.251	37.4948	131.253	37.4948	144.266	37.5026	127.002	37.4948	126.844	37.5026	127.082	37.4948	126.829	37.5026	124.002	37.4948	126.049	37.5026	127.087
37.9147	118.174	37.9069	125.205	37.9147	118.248	37.9069	125.208	37.9069	122.636	37.9069	122.635	37.9069	122.634	37.9069	122.632	37.9069	135.563	37.9147	118.64	37.9069	118.245	37.9147	118.715	37.9069	118.229	37.9147	115.68	37.9069	117.46	37.9147	118.719
38.3268	125.22	38.3189	132.533	38.3268	125.299	38.3189	132.543	38.3189	129.904	38.3189	129.903	38.3189	129.906	38.3189	129.907	38.3189	142.952	38.3268	125.673	38.3189	125.493	38.3268	125.756	38.3189	125.476	38.3268	122.658	38.3189	124.695	38.3268	125.761
38.7389	121.203	38.7309	128.412	38.7389	121.275	38.7309	128.417	38.7309	125.852	38.7309	125.849	38.7309	125.848	38.7309	125.848	38.7309	138.753	38.7389	121.67	38.7309	121.461	38.7389	121.746	38.7309	121.446	38.7389	118.718	38.7309	120.676	38.7389	121.751
39.151	122.988	39.143	130.273	39.151	123.062	39.143	130.28	39.143	127.621	39.143	127.618	39.143	127.617	39.143	127.62	39.143	140.731	39.151	123.432	39.143	123.195	39.151	123.514	39.143	123.184	39.151	120.394	39.143	122.391	39.151	123.519
39.5632	123.107	39.555	130.39	39.5632	123.182	39.555	130.396	39.555	127.816	39.555	127.814	39.555	127.814	39.555	127.815	39.555	140.744	39.5632	123.572	39.555	123.422	39.5632	123.651	39.555	123.405	39.5632	120.609	39.555	122.636	39.5632	123.656
39.9753	119.302	39.967	126.507	39.9753	119.376	39.967	126.513	39.967	123.805	39.967	123.802	39.967	123.8	39.967	123.802	39.967	137.028	39.9753	119.733	39.967	119.359	39.9753	119.815	39.967	119.352	39.9753	116.646	39.967	118.544	39.9753	119.82
40.3874	123.995	40.3791	131.307	40.3874	124.07	40.3791	131.312	40.3791	128.719	40.3791	128.717	40.3791	128.717	40.3791	128.718	40.3791	141.678	40.3874	124.457	40.3791	124.32	40.3874	124.536	40.3791	124.304	40.3874	121.481	40.3791	123.53	40.3874	124.541
40.7995	112.485	40.7911	119.323	40.7995	112.556	40.7911	119.331	40.7911	116.461	40.7911	116.455	40.7911	116.45	40.7911	116.457	40.7911	130.036	40.7995	112.872	40.7911	111.951	40.7995	112.96	40.7911	111.955	40.7995	109.639	40.7911	111.097	40.7995	112.965
41.2116	124.026	41.2031	131.347	41.2116	124.105	41.2031	131.353	41.2031	128.743	41.2031	128.743	41.2031	128.744	41.2031	128.743	41.2031	141.733	41.2116	124.486	41.2031	124.341	41.2116	124.565	41.2031	124.323	41.2116	121.495	41.2031	123.548	41.2116	124.57
41.6237	107.102	41.6152	114.213	41.6237	107.154	41.6152	114.217	41.6152	111.898	41.6152	111.879	41.6152	111.874	41.6152	111.877	41.6152	124.3	41.6237	107.591	41.6152	107.577	41.6237	107.665	41.6152	107.572	41.6237	104.797	41.6152	106.842	41.6237	107.669
42.0359	123.231	42.0272	130.54	42.0359	123.305	42.0272	130.546	42.0272	127.919	42.0272	127.917	42.0272	127.916	42.0272	127.917	42.0272	140.948	42.0359	123.683	42.0272	123.506	42.0359	123.763	42.0272	123.493	42.0359	120.674	42.0272	122.709	42.0359	123.767
42.448	115.799	42.4392	123.383	42.448	115.869	42.4392	123.386	42.4392	120.935	42.4392	120.933	42.4392	120.93	42.4392	120.93	42.4392	133.572	42.448	116.297	42.4392	116.584	42.448	116.368	42.4392	116.565	42.448	113.453	42.4392	115.824	42.448	116.373
42.8601	121.46	42.8513	128.737	42.8601	121.535	42.8513	128.742	42.8513	126.088	42.8513	126.087	42.8513	126.085	42.8513	126.086	42.8513	139.186	42.8601	121.906	42.8513	121.665	42.8601	121.985	42.8513	121.653	42.8601	118.869	42.8513	120.862	42.8601	121.99
43.2722	119.725	43.2633	127.283	43.2722	119.797	43.2633	127.292	43.2633	124.775	43.2633	124.771	43.2633	124.772	43.2633	124.775	43.2633	137.552	43.2722	120.206	43.2633	120.402	43.2722	120.285	43.2633	120.385	43.2722	117.305	43.2633	119.63	43.2722	120.29
43.6843	118.235	43.6753	125.427	43.6843	118.309	43.6753	125.431	43.6753	122.724	43.6753	122.722	43.6753	122.718	43.6753	122.721	43.6753	135.953	43.6843	118.666	43.6753	118.28	43.6843	118.747	43.6753	118.271	43.6843	115.577	43.6753	117.464	43.6843	118.752
44.0964	121.648	44.0874	129.192	44.0964	121.724	44.0874	129.2	44.0874	126.653	44.0874	126.651	44.0874	126.652	44.0874	126.652	44.0874	139.498	44.0964	122.123	44.0874	122.271	44.0964	122.202	44.0874	122.252	44.0964	119.193	44.0874	121.492	44.0964	122.206
44.5085	111.764	44.4994	118.648	44.5085	111.839	44.4994	118.65	44.4994	115.774	44.4994	115.771	44.4994	115.765	44.4994	115.767	44.4994	129.361	44.5085	112.151	44.4994	111.264	44.5085	112.234	44.4994	111.264	44.5085	108.9	44.4994	110.409	44.5085	112.239
44.9207	122.386	44.9114	129.923	44.9207	122.459	44.9114	129.931	44.9114	127.363	44.9114	127.36	44.9114	127.359	44.9114	127.362	44.9114	140.257	44.9207	122.854	44.9114	122.971	44.9207	122.934	44.9114	122.956	44.9207	119.902	44.9114	122.187	44.9207	122.939
45.3328	98.9461	45.3234	108.771	45.3328	98.9923	45.3234	108.759	45.3234	107.038	45.3234	107.036	45.3234	107.029	45.3234	107.021	45.3234	117.985	45.3328	99.7018	45.3234	102.926	45.3328	99.7237	45.3234	102.888	45.3328	97.7525	45.3234	102.308	45.3328	99.7283
45.7449	122.184	45.7355	129.722	45.7449	122.257	45.7355	129.729	45.7355	127.143	45.7355	127.14	45.7355	127.139	45.7355	127.141	45.7355	140.081	45.7449	122.646	45.7355	122.745	45.7449	122.726	45.7355	122.731	45.7449	119.676	45.7355	121.956	45.7449	122.73
46.157	114.152	46.1475	122.123	46.157	114.228	46.1475	122.129	46.1475	119.745	46.1475	119.746	46.1475	119.749	46.1475	119.747	46.1475	132.221	46.157	114.68	46.1475	115.425	46.157	114.753	46.1475	115.397	46.157	111.928	46.1475	114.683	46.157	114.757
46.5691	121.034	46.5595	128.583	46.5691	121.108	46.5595	128.59	46.5595	125.984	46.5595	125.981	46.5595	125.981	46.5595	125.982	46.5595	138.98	46.5691	121.49	46.5595	121.578	46.5691	121.57	46.5595	121.565	46.5691	118.498	46.5595	120.786	46.5691	121.575
46.9813	118.999	46.9716	126.773	46.9813	119.073	46.9716	126.78	46.9716	124.305	46.9716	124.303	46.9716	124.304	46.9716	124.305	46.9716	136.983	46.9813	119.495	46.9716	119.948	46.9813	119.572	46.9716	119.927	46.9813	116.642	46.9716	119.185	46.9813	119.576
47.3934	118.678	47.3836	126.264	47.3934	118.754	47.3836	126.273	47.3836	123.638	47.3836	123.635	47.3836	123.636	47.3836	123.638	47.3836	136.687	47.3934	119.127	47.3836	119.225	47.3934	119.21	47.3836	119.21	47.3934	116.105	47.3836	118.426	47.3934	119.214
47.8055	121.483	47.7956	129.198	47.8055	121.553	47.7956	129.202	47.7956	126.691	47.7956	126.689	47.7956	126.685	47.7956	126.687	47.7956	139.459	47.8055	121.968	47.7956	122.316	47.8055	122.042	47.7956	122.301	47.8055	119.074	47.7956	121.544	47.8055	122.047
48.2176	114.383	48.2077	122.127	48.2176	114.457	48.2077	122.131	48.2077	119.471	48.2077	119.469	48.2077	119.467	48.2077	119.466	48.2077	132.59	48.2176	114.82	48.2077	115.047	48.2176	114.898	48.2077	115.036	48.2176	111.759	48.2077	114.242	48.2176	114.903
48.6297	122.743	48.6197	130.439	48.6297	122.818	48.6197	130.449	48.6197	127.91	48.6197	127.907	48.6197	127.909	48.6197	127.911	48.6197	140.74	48.6297	123.221	48.6197	123.531	48.6297	123.301	48.6197	123.513	48.6297	120.303	48.6197	122.754	48.6297	123.306
49.0418	108.407	49.0317	116.964	49.0418	108.469	49.0317	116.976	49.0317	114.504	49.0317	114.494	49.0317	114.493	49.0317	114.5	49.0317	127.192	49.0418	108.888	49.0317	110.145	49.0418	108.97	49.0317	110.134	49.0418	106.031	49.0317	109.385	49.0418	108.975
49.4539	123.133	49.4438	130.835	49.4539	123.208	49.4438	130.841	49.4438	128.287	49.4438	128.286	49.4438	128.286	49.4438	128.286	49.4438	141.154	49.4539	123.607	49.4438	123.903	49.4539	123.684	49.4438	123.884	49.4539	120.672	49.4438	123.122	49.4539	123.689
49.8661	113.513	49.8558	121.504	49.8661	113.585	49.8558	121.504	49.8558	119.124	49.8558	119.126	49.8558	119.123	49.8558	119.121	49.8558	131.592	49.8661	114.043	49.8558	114.801	49.8661	114.109	49.8558	114.776	49.8661	111.295	49.8558	114.058	49.8661	114.113
50.2782	122.762	50.2678	130.488	50.2782	122.834	50.2678	130.494	50.2678	127.927	50.2678	127.925	50.2678	127.923	50.2678	127.925	50.2678	140.822	50.2782	123.231	50.2678	123.535	50.2782	123.309	50.2678	123.52	50.2782	120.282	50.2678	122.751	50.2782	123.313
50.6903	118.573	50.6799	126.305	50.6903	118.647	50.6799	126.311	50.6799	123.847	50.6799	123.845	50.6799	123.846	50.6799	123.845	50.6799	136.498	50.6903	119.073	50.6799	119.493	50.6903	119.148	50.6799	119.471	50.6903	116.232	50.6799	118.731	50.6903	119.153
51.1024	121.617	51.0919	129.394	51.1024	121.692	51.0919	129.401	51.0919	126.822	51.0919	126.819	51.0919	126.821	51.0919	126.82	51.0919	139.751	51.1024	122.082	51.0919	122.428	51.1024	122.161	51.0919	122.411	51.1024	119.119	51.0919	121.641	51.1024	122.166
51.5145	121.526	51.5039	129.2	51.5145	121.6	51.5039	129.207	51.5039	126.7	51.5039	126.699	51.5039	126.7	51.5039	126.7	51.5039	139.458	51.5145	122.014	51.5039	122.333	51.5145	122.091	51.5039	122.312	51.5145	119.131	51.5039	121.562	51.5145	122.096
51.9266	119.609	51.916	127.487	51.9266	119.681	51.916	127.493	51.916	124.906	51.916	124.904	51.916	124.902	51.916	124.905	51.916	137.85	51.9266	120.071	51.916	120.507	51.9266	120.15	51.916	120.493	51.9266	117.1	51.916	119.719	51.9266	120.155
52.3388	123.272	52.328	130.934	52.3388	123.346	52.328	130.94	52.328	128.411	52.328	128.41	52.328	128.409	52.328	128.411	52.328	141.218	52.3388	123.754	52.328	124.034	52.3388	123.831	52.328	124.016	52.3388	120.846	52.328	123.259	52.3388	123.836
52.7509	116.879	52.74	124.927	52.7509	116.951	52.74	124.932	52.74	122.36	52.74	122.357	52.74	122.355	52.74	122.356	52.74	135.269	52.7509	117.344	52.74	117.966	52.7509	117.422	52.74	117.952	52.7509	114.388	52.74	117.181	52.7509	117.426
53.163	124.19	53.152	131.859	53.163	124.265	53.152	131.866	53.152	129.32	53.152	129.319	53.152	129.319	53.152	129.321	53.152	142.164	53.163	124.668	53.152	124.938	53.163	124.746	53.152	124.92	53.163	121.744	53.152	124.16	53.163	124.751
53.5751	115.387	53.5641	123.44	53.5751	115.462	53.5641	123.446	53.5641	120.942	53.5641	120.939	53.5641	120.941	53.5641	120.939	53.5641	133.702	53.5751	115.875	53.5641	116.577	53.5751	115.951	53.5641	116.556	53.5751	112.999	53.5641	115.807	53.5751	115.955
53.9872	124.446	53.9761	132.133	53.9872	124.519	53.9761	132.139	53.9761	129.582	53.9761	129.58	53.9761	129.579	53.9761	129.581	53.9761	142.458	53.9872	124.919	53.9761	125.194	53.9872	124.997	53.9761	125.178	53.9872	121.982	53.9761	124.412	53.9872	125.001
54.3993	117.588	54.3881	125.325	54.3993	117.662	54.3881	125.333	54.3881	122.855	54.3881	122.852	54.3881	122.854	54.3881	122.854	54.3881	135.522	54.3993	118.084	54.3881	118.497	54.3993	118.161	54.3881	118.477	54.3993	115.233	54.3881	117.733	54.3993	118.166
54.8115	124.097	54.8002	131.816	54.8115	124.171	54.8002	131.822	54.8002	129.254	54.8002	129.253	54.8002	129.252	54.8002	129.253	54.8002	142.154	54.8115	124.567	54.8002	124.863	54.8115	124.645	54.8002	124.847	54.8115	121.619	54.8002	124.08	54.8115	124.65
55.2236	120.566	55.2122	128.164	55.2236	120.642	55.2122	128.172	55.2122	125.669	55.2122	125.667	55.2122	125.669	55.2122	125.669	55.2122	138.412	55.2236	121.055	55.2122	121.304	55.2236	121.133	55.2122	121.282	55.2236	118.176	55.2122	120.534	55.2236	121.137
55.6357	123.152	55.6242	130.919	55.6357	123.225	55.6242	130.926	55.6242	128.347	55.6242	128.346	55.6242	128.345	55.6242	128.347	55.6242	141.271	55.6357	123.619	55.6242	123.952	55.6357	123.698	55.6242	123.937	55.6357	120.661	55.6242	123.166	55.6357	123.703
56.0478	122.791	56.0363	130.36	56.0478	122.866	56.0363	130.366	56.0363	127.842	56.0363	127.84	56.0363	127.841	56.0363	127.841	56.0363	140.642	56.0478	123.273	56.0363	123.467	56.0478	123.35	56.0363	123.448	56.0478	120.37	56.0363	122.692	56.0478	123.355
56.4599	121.631	56.4483	129.462	56.4599	121.706	56.4483	129.468	56.4483	126.885	56.4483	126.883	56.4483	126.884	56.4483	126.884	56.4483	139.821	56.4599	122.096	56.4483	122.49	56.4599	122.174	56.4483	122.473	56.4599	119.132	56.4483	121.703	56.4599	122.179
56.872	124.239	56.8603	131.814	56.872	124.313	56.8603	131.82	56.8603	129.278	56.8603	129.277	56.8603	129.276	56.8603	129.277	56.8603	142.116	56.872	124.718	56.8603	124.897	56.872	124.794	56.8603	124.878	56.872	121.797	56.8603	124.118	56.872	124.799
57.2841	119.751	57.2724	127.642	57.2841	119.827	57.2724	127.648	57.2724	125.069	57.2724	125.067	57.2724	125.068	57.2724	125.067	57.2724	137.997	57.2841	120.219	57.2724	120.675	57.2841	120.296	57.2724	120.658	57.2841	117.261	57.2724	119.889	57.2841	120.301
57.6963	125.042	57.6844	132.634	57.6963	125.117	57.6844	132.641	57.6844	130.086	57.6844	130.084	57.6844	130.084	57.6844	130.085	57.6844	142.952	57.6963	125.517	57.6844	125.7	57.6963	125.595	57.6844	125.682	57.6963	122.583	57.6844	124.918	57.6963	125.6
58.1084	118.524	58.0964	126.352	58.1084	118.596	58.0964	126.358	58.0964	123.806	58.0964	123.804	58.0964	123.802	58.0964	123.805	58.0964	136.665	58.1084	119	58.0964	119.42	58.1084	119.077	58.0964	119.405	58.1084	116.074	58.0964	118.639	58.1084	119.082
58.5205	125.286	58.5085	132.902	58.5205	125.361	58.5085	132.909	58.5085	130.343	58.5085	130.341	58.5085	130.342	58.5085	130.343	58.5085	143.236	58.5205	125.757	58.5085	125.954	58.5205	125.836	58.5085	125.936	58.5205	122.811	58.5085	125.17	58.5205	125.84
58.9326	119.294	58.9205	126.91	58.9326	119.369	58.9205	126.916	58.9205	124.392	58.9205	124.39	58.9205	124.391	58.9205	124.39	58.9205	137.185	58.9326	119.778	58.9205	120.017	58.9326	119.854	58.9205	119.998	58.9326	116.878	58.9205	119.243	58.9326	119.859
59.3447	125.007	59.3325	132.655	59.3447	125.082	59.3325	132.662	59.3325	130.085	59.3325	130.084	59.3325	130.084	59.3325	130.085	59.3325	143.001	59.3447	125.475	59.3325	125.692	59.3447	125.554	59.3325	125.675	59.3447	122.52	59.3325	124.906	59.3447	125.559
59.7569	121.259	59.7445	128.751	59.7569	121.331	59.7445	128.756	59.7445	126.23	59.7445	126.229	59.7445	126.228	59.7445	126.229	59.7445	139.033	59.7569	121.741	59.7445	121.854	59.7569	121.817	59.7445	121.836	59.7569	118.837	59.7445	121.079	59.7569	121.822
60.169	124.218	60.1566	131.905	60.169	124.293	60.1566	131.912	60.1566	129.326	60.1566	129.325	60.1566	129.325	60.1566	129.326	60.1566	142.263	60.169	124.684	60.1566	124.929	60.169	124.763	60.1566	124.913	60.169	121.72	60.1566	124.141	60.169	124.768
60.5811	123.099	60.5686	130.566	60.5811	123.172	60.5686	130.574	60.5686	128.033	60.5686	128.031	60.5686	128.031	60.5686	128.033	60.5686	140.869	60.5811	123.576	60.5686	123.652	60.5811	123.655	60.5686	123.634	60.5811	120.658	60.5686	122.874	60.5811	123.66
60.9932	122.933	60.9806	130.664	60.9932	123.009	60.9806	130.671	60.9806	128.076	60.9806	128.075	60.9806	128.074	60.9806	128.076	60.9806	141.033	60.9932	123.397	60.9806	123.676	60.9932	123.477	60.9806	123.66	60.9932	120.425	60.9806	122.887	60.9932	123.482
61.4053	124.426	61.3927	131.905	61.4053	124.5	61.3927	131.912	61.3927	129.359	61.3927	129.357	61.3927	129.358	61.3927	129.359	61.3927	142.222	61.4053	124.9	61.3927	124.974	61.4053	124.979	61.3927	124.956	61.4053	121.969	61.3927	124.193	61.4053	124.984
61.8174	121.296	61.8047	129.054	61.8174	121.373	61.8047	129.059	61.8047	126.463	61.8047	126.461	61.8047	126.462	61.8047	126.462	61.8047	139.424	61.8174	121.759	61.8047	122.063	61.8174	121.838	61.8047	122.046	61.8174	118.784	61.8047	121.273	61.8174	121.843
62.2296	125.212	62.2167	132.715	62.2296	125.286	62.2167	132.721	62.2167	130.157	62.2167	130.155	62.2167	130.154	62.2167	130.156	62.2167	143.046	62.2296	125.684	62.2167	125.766	62.2296	125.762	62.2167	125.75	62.2296	122.74	62.2167	124.983	62.2296	125.766
62.6417	119.872	62.6288	127.572	62.6417	119.947	62.6288	127.578	62.6288	124.993	62.6288	124.99	62.6288	124.991	62.6288	124.991	62.6288	137.934	62.6417	120.338	62.6288	120.596	62.6417	120.416	62.6288	120.58	62.6417	117.376	62.6288	119.808	62.6417	120.421
63.0538	125.491	63.0408	133.021	63.0538	125.566	63.0408	133.029	63.0408	130.452	63.0408	130.451	63.0408	130.451	63.0408	130.453	63.0408	143.369	63.0538	125.96	63.0408	126.059	63.0538	126.039	63.0408	126.042	63.0538	123.005	63.0408	125.274	63.0538	126.044
63.4659	119.73	63.4528	127.252	63.4659	119.804	63.4528	127.259	63.4528	124.697	63.4528	124.695	63.4528	124.695	63.4528	124.697	63.4528	137.576	63.4659	120.203	63.4528	120.309	63.4659	120.282	63.4528	120.293	63.4659	117.267	63.4528	119.527	63.4659	120.286
63.878	125.285	63.8648	132.846	63.878	125.36	63.8648	132.853	63.8648	130.267	63.8648	130.266	63.8648	130.266	63.8648	130.267	63.8648	143.205	63.878	125.751	63.8648	125.87	63.878	125.83	63.8648	125.854	63.878	122.786	63.8648	125.082	63.878	125.835
64.2901	120.996	64.2769	128.381	64.2901	121.068	64.2769	128.385	64.2769	125.839	64.2769	125.837	64.2769	125.836	64.2769	125.835	64.2769	138.689	64.2901	121.472	64.2769	121.453	64.2901	121.547	64.2769	121.437	64.2901	118.546	64.2769	120.673	64.2901	121.552
64.7023	124.598	64.6889	132.193	64.7023	124.673	64.6889	132.2	64.6889	129.604	64.6889	129.602	64.6889	129.602	64.6889	129.603	64.6889	142.571	64.7023	125.061	64.6889	125.203	64.7023	125.14	64.6889	125.187	64.7023	122.086	64.6889	124.412	64.7023	125.145
65.1144	122.599	65.1009	129.955	65.1144	122.674	65.1009	129.961	65.1009	127.407	65.1009	127.406	65.1009	127.406	65.1009	127.407	65.1009	140.27	65.1144	123.075	65.1009	123.022	65.1144	123.153	65.1009	123.004	65.1144	120.143	65.1009	122.242	65.1144	123.157
65.5265	123.427	65.513	131.056	65.5265	123.502	65.513	131.062	65.513	128.455	65.513	128.454	65.513	128.454	65.513	128.454	65.513	141.443	65.5265	123.888	65.513	124.05	65.5265	123.966	65.513	124.035	65.5265	120.902	65.513	123.258	65.5265	123.971
65.9386	123.898	65.925	131.27	65.9386	123.972	65.925	131.276	65.925	128.713	65.925	128.711	65.925	128.711	65.925	128.712	65.925	141.6	65.9386	124.37	65.925	124.323	65.9386	124.448	65.925	124.307	65.9386	121.428	65.925	123.54	65.9386	124.453
66.3507	121.832	66.337	129.479	66.3507	121.906	66.337	129.485	66.337	126.869	66.337	126.868	66.337	126.866	66.337	126.868	66.337	139.882	66.3507	122.29	66.337	122.46	66.3507	122.369	66.337	122.446	66.3507	119.295	66.337	121.665	66.3507	122.373
66.7628	124.726	66.7491	132.126	66.7628	124.8	66.7491	132.133	66.7491	129.559	66.7491	129.557	66.7491	129.557	66.7491	129.558	66.7491	142.471	66.7628	125.194	66.7491	125.165	66.7628	125.273	66.7491	125.149	66.7628	122.241	66.7491	124.379	66.7628	125.278
67.1749	120.128	67.1611	127.729	67.1749	120.203	67.1611	127.735	67.1611	125.117	67.1611	125.115	67.1611	125.116	67.1611	125.116	67.1611	138.127	67.1749	120.585	67.1611	120.709	67.1749	120.665	67.1611	120.694	67.1749	117.591	67.1611	119.914	67.1749	120.669
67.5871	125.072	67.5731	132.504	67.5871	125.146	67.5731	132.511	67.5731	129.926	67.5731	129.924	67.5731	129.924	67.5731	129.925	67.5731	142.863	67.5871	125.538	67.5731	125.528	67.5871	125.616	67.5731	125.512	67.5871	122.574	67.5731	124.74	67.5871	125.621
67.9992	119.213	67.9852	126.641	67.9992	119.288	67.9852	126.649	67.9852	124.049	67.9852	124.046	67.9852	124.048	67.9852	124.048	67.9852	137.02	67.9992	119.675	67.9852	119.648	67.9992	119.755	67.9852	119.632	67.9992	116.701	67.9852	118.857	67.9992	119.759
68.4113	124.937	68.3972	132.403	68.4113	125.013	68.3972	132.409	68.3972	129.812	68.3972	129.811	68.3972	129.811	68.3972	129.812	68.3972	142.777	68.4113	125.401	68.3972	125.411	68.4113	125.48	68.3972	125.395	68.4113	122.426	68.3972	124.621	68.4113	125.485
68.8234	119.84	68.8092	127.094	68.8234	119.913	68.8092	127.101	68.8092	124.527	68.8092	124.524	68.8092	124.524	68.8092	124.526	68.8092	137.44	68.8234	120.309	68.8092	120.133	68.8234	120.387	68.8092	120.118	68.8234	117.358	68.8092	119.347	68.8234	120.392
69.2355	124.321	69.2213	131.817	69.2355	124.396	69.2213	131.824	69.2213	129.215	69.2213	129.214	69.2213	129.213	69.2213	129.214	69.2213	142.207	69.2355	124.781	69.2213	124.809	69.2355	124.86	69.2213	124.794	69.2355	121.794	69.2213	124.016	69.2355	124.865
69.6476	121.291	69.6333	128.504	69.6476	121.366	69.6333	128.511	69.6333	125.942	69.6333	125.941	69.6333	125.941	69.6333	125.942	69.6333	138.844	69.6476	121.762	69.6333	121.552	69.6476	121.841	69.6333	121.535	69.6476	118.816	69.6333	120.768	69.6476	121.845
70.0597	123.201	70.0453	130.725	70.0597	123.276	70.0453	130.732	70.0453	128.11	70.0453	128.108	70.0453	128.108	70.0453	128.109	70.0453	141.133	70.0597	123.656	70.0453	123.699	70.0597	123.737	70.0453	123.684	70.0597	120.655	70.0453	122.903	70.0597	123.742
70.4719	122.651	70.4574	129.892	70.4719	122.726	70.4574	129.898	70.4574	127.323	70.4574	127.322	70.4574	127.322	70.4574	127.323	70.4574	140.236	70.4719	123.121	70.4574	122.93	70.4719	123.199	70.4574	122.913	70.4719	120.168	70.4574	122.145	70.4719	123.204
70.884	121.558	70.8694	129.098	70.884	121.634	70.8694	129.105	70.8694	126.466	70.8694	126.464	70.8694	126.465	70.8694	126.466	70.8694	139.526	70.884	122.01	70.8694	122.05	70.884	122.091	70.8694	122.036	70.884	118.993	70.8694	121.25	70.884	122.095
71.2961	123.586	71.2814	130.867	71.2961	123.661	71.2814	130.873	71.2814	128.289	71.2814	128.287	71.2814	128.287	71.2814	128.287	71.2814	141.224	71.2961	124.052	71.2814	123.891	71.2961	124.131	71.2814	123.875	71.2961	121.089	71.2814	123.104	71.2961	124.136
71.7082	119.52	71.6934	127.022	71.7082	119.597	71.6934	127.029	71.6934	124.374	71.6934	124.373	71.6934	124.373	71.6934	124.374	71.6934	137.468	71.7082	119.968	71.6934	119.954	71.7082	120.05	71.6934	119.939	71.7082	116.939	71.6934	119.151	71.7082	120.055
72.1203	124.026	72.1055	131.346	72.1203	124.101	72.1055	131.352	72.1055	128.755	72.1055	128.755	72.1055	128.754	72.1055	128.755	72.1055	141.72	72.1203	124.49	72.1055	124.354	72.1203	124.568	72.1055	124.338	72.1203	121.515	72.1055	123.563	72.1203	124.573
72.5324	117.774	72.5175	125.092	72.5324	117.85	72.5175	125.099	72.5175	122.449	72.5175	122.447	72.5175	122.448	72.5175	122.448	72.5175	135.536	72.5324	118.223	72.5175	118.03	72.5324	118.304	72.5175	118.016	72.5324	115.202	72.5175	117.229	72.5324	118.308
72.9446	123.971	72.9295	131.325	72.9446	124.046	72.9295	131.332	72.9295	128.722	72.9295	128.721	72.9295	128.72	72.9295	128.722	72.9295	141.713	72.9446	124.431	72.9295	124.316	72.9446	124.511	72.9295	124.3	72.9446	121.443	72.9295	123.522	72.9446	124.515
73.3567	117.645	73.3416	124.712	73.3567	117.722	73.3416	124.719	73.3416	122.107	73.3416	122.105	73.3416	122.105	73.3416	122.106	73.3416	135.107	73.3567	118.106	73.3416	117.702	73.3567	118.186	73.3416	117.686	73.3567	115.122	73.3416	116.91	73.3567	118.19
73.7688	123.405	73.7536	130.789	73.7688	123.48	73.7536	130.795	73.7536	128.171	73.7536	128.17	73.7536	128.169	73.7536	128.17	73.7536	141.2	73.7688	123.861	73.7536	123.759	73.7688	123.94	73.7536	123.745	73.7688	120.859	73.7536	122.962	73.7688	123.945
74.1809	119.042	74.1656	126.053	74.1809	119.118	74.1656	126.06	74.1656	123.474	74.1656	123.473	74.1656	123.473	74.1656	123.474	74.1656	136.41	74.1809	119.509	74.1656	119.079	74.1809	119.587	74.1656	119.062	74.1809	116.547	74.1656	118.292	74.1809	119.592
74.593	122.284	74.5777	129.692	74.593	122.36	74.5777	129.699	74.5777	127.056	74.5777	127.055	74.5777	127.055	74.5777	127.056	74.5777	140.125	74.593	122.735	74.5777	122.638	74.593	122.816	74.5777	122.624	74.593	119.715	74.5777	121.838	74.593	122.82
75.0052	120.62	74.9897	127.691	75.0052	120.695	74.9897	127.697	74.9897	125.113	74.9897	125.112	74.9897	125.112	74.9897	125.112	74.9897	138.048	75.0052	121.086	74.9897	120.717	75.0052	121.164	74.9897	120.7	75.0052	118.123	74.9897	119.93	75.0052	121.169
75.4173	120.534	75.4017	127.953	75.4173	120.611	75.4017	127.959	75.4017	125.292	75.4017	125.291	75.4017	125.291	75.4017	125.293	75.4017	138.419	75.4173	120.979	75.4017	120.866	75.4173	121.061	75.4017	120.853	75.4173	117.935	75.4017	120.06	75.4173	121.065
75.8294	121.757	75.8138	128.895	75.8294	121.832	75.8138	128.901	75.8138	126.307	75.8138	126.305	75.8138	126.305	75.8138	126.306	75.8138	139.27	75.8294	122.22	75.8138	121.906	75.8294	122.299	75.8138	121.891	75.8294	119.246	75.8138	121.117	75.8294	122.304
76.2415	118.08	76.2258	125.457	76.2415	118.156	76.2258	125.463	76.2258	122.764	76.2258	122.762	76.2258	122.762	76.2258	122.763	76.2258	135.959	76.2415	118.514	76.2258	118.325	76.2415	118.597	76.2258	118.314	76.2415	115.44	76.2258	117.512	76.2415	118.601
76.6536	122.34	76.6378	129.531	76.6536	122.416	76.6378	129.537	76.6378	126.929	76.6378	126.928	76.6378	126.927	76.6378	126.928	76.6378	139.921	76.6536	122.801	76.6378	122.523	76.6536	122.88	76.6378	122.508	76.6536	119.814	76.6378	121.73	76.6536	122.885
77.0657	115.222	77.0499	122.378	77.0657	115.3	77.0499	122.384	77.0499	119.652	77.0499	119.651	77.0499	119.652	77.0499	119.651	77.0499	132.923	77.0657	115.65	77.0499	115.205	77.0657	115.733	77.0499	115.193	77.0657	112.553	77.0499	114.385	77.0657	115.738
77.4779	122.369	77.4619	129.597	77.4779	122.444	77.4619	129.603	77.4619	126.979	77.4619	126.978	77.4619	126.977	77.4619	126.978	77.4619	140.005	77.4779	122.824	77.4619	122.567	77.4779	122.904	77.4619	122.553	77.4779	119.822	77.4619	121.771	77.4779	122.909
77.89	113.928	77.8739	120.642	77.89	114.006	77.8739	120.647	77.8739	117.969	77.8739	117.97	77.8739	117.969	77.8739	117.969	77.8739	131.117	77.89	114.373	77.8739	113.545	77.89	114.453	77.8739	113.53	77.89	111.334	77.8739	112.738	77.89	114.458
78.3021	121.823	78.2859	129.076	78.3021	121.898	78.2859	129.084	78.2859	126.44	78.2859	126.438	78.2859	126.438	78.2859	126.44	78.2859	139.514	78.3021	122.273	78.2859	122.021	78.3021	122.355	78.2859	122.007	78.3021	119.252	78.2859	121.22	78.3021	122.359
78.7142	115.581	78.698	122.293	78.7142	115.659	78.698	122.299	78.698	119.707	78.698	119.708	78.698	119.709	78.698	119.707	78.698	132.655	78.7142	116.046	78.698	115.315	78.7142	116.124	78.698	115.295	78.7142	113.075	78.698	114.527	78.7142	116.128
79.1263	120.644	79.11	127.911	79.1263	120.719	79.11	127.918	79.11	125.249	79.11	125.248	79.11	125.247	79.11	125.249	79.11	138.377	79.1263	121.088	79.11	120.821	79.1263	121.17	79.11	120.808	79.1263	118.043	79.11	120.015	79.1263	121.174
79.5384	117.764	79.522	124.659	79.5384	117.84	79.522	124.665	79.522	122.086	79.522	122.083	79.522	122.085	79.522	122.084	79.522	135.017	79.5384	118.228	79.522	117.693	79.5384	118.307	79.522	117.675	79.5384	115.264	79.522	116.906	79.5384	118.312
79.9506	118.68	79.9341	125.94	79.9506	118.756	79.9341	125.946	79.9341	123.241	79.9341	123.24	79.9341	123.239	79.9341	123.24	79.9341	136.455	79.9506	119.114	79.9341	118.799	79.9506	119.196	79.9341	118.788	79.9506	116.033	79.9341	117.985	79.9506	119.201
80.3627	119.288	80.3461	126.307	80.3627	119.364	80.3461	126.314	80.3461	123.718	80.3461	123.717	80.3461	123.718	80.3461	123.718	80.3461	136.677	80.3627	119.75	80.3461	119.319	80.3627	119.83	80.3461	119.303	80.3627	116.773	80.3461	118.53	80.3627	119.835
80.7748	115.618	80.7581	122.812	80.7748	115.694	80.7581	122.818	80.7581	120.047	80.7581	120.046	80.7581	120.043	80.7581	120.046	80.7581	133.402	80.7748	116.035	80.7581	115.58	80.7748	116.119	80.7581	115.573	80.7748	112.893	80.7581	114.75	80.7748	116.124
81.1869	120.069	81.1702	127.156	81.1869	120.145	81.1702	127.164	81.1702	124.548	81.1702	124.547	81.1702	124.547	81.1702	124.548	81.1702	137.555	81.1869	120.526	81.1702	120.141	81.1869	120.607	81.1702	120.126	81.1869	117.531	81.1702	119.347	81.1869	120.612
81.599	110.895	81.5822	117.726	81.599	110.977	81.5822	117.733	81.5822	114.82	81.5822	114.816	81.5822	114.82	81.5822	114.817	81.5822	128.51	81.599	111.278	81.5822	110.305	81.599	111.366	81.5822	110.299	81.599	108.017	81.5822	109.442	81.599	111.37
82.0111	120.163	81.9942	127.285	82.0111	120.239	81.9942	127.292	81.9942	124.655	81.9942	124.653	81.9942	124.653	81.9942	124.654	81.9942	137.708	82.0111	120.614	81.9942	120.239	82.0111	120.696	81.9942	120.224	82.0111	117.597	81.9942	119.439	82.0111	120.7
82.4232	107.109	82.4063	112.835	82.4232	107.181	82.4063	112.841	82.4063	110.085	82.4063	110.081	82.4063	110.078	82.4063	110.08	82.4063	123.428	82.4232	107.523	82.4063	105.641	82.4232	107.606	82.4063	105.637	82.4232	104.407	82.4063	104.822	82.4232	107.611
82.8354	119.567	82.8183	126.698	82.8354	119.642	82.8183	126.704	82.8183	124.039	82.8183	124.037	82.8183	124.037	82.8183	124.038	82.8183	137.163	82.8354	120.011	82.8183	119.612	82.8354	120.092	82.8183	119.6	82.8354	116.967	82.8183	118.807	82.8354	120.097
83.2475	111.232	83.2303	117.949	83.2475	111.307	83.2303	117.958	83.2303	115.494	83.2303	115.49	83.2303	115.494	83.2303	115.493	83.2303	128.156	83.2475	111.715	83.2303	111.148	83.2475	111.793	83.2303	111.126	83.2475	108.831	83.2303	110.387	83.2475	111.798
83.6596	118.192	83.6424	125.305	83.6596	118.27	83.6424	125.311	83.6424	122.606	83.6424	122.605	83.6424	122.606	83.6424	122.606	83.6424	135.823	83.6596	118.627	83.6424	118.167	83.6596	118.71	83.6424	118.154	83.6596	115.546	83.6424	117.351	83.6596	118.714
84.0717	114.848	84.0544	121.922	84.0717	114.923	84.0544	121.928	84.0544	119.415	84.0544	119.413	84.0544	119.414	84.0544	119.414	84.0544	132.175	84.0717	115.327	84.0544	115.047	84.0717	115.404	84.0544	115.027	84.0717	112.413	84.0544	114.275	84.0717	115.409
84.4838	115.777	84.4664	122.819	84.4838	115.854	84.4664	122.826	84.4664	120.056	84.4664	120.054	84.4664	120.054	84.4664	120.055	84.4664	133.409	84.4838	116.193	84.4664	115.591	84.4838	116.278	84.4664	115.582	84.4838	113.052	84.4664	114.762	84.4838	116.283
84.8959	116.872	84.8785	124.053	84.8959	116.947	84.8785	124.059	84.8785	121.502	84.8785	121.501	84.8785	121.5	84.8785	121.501	84.8785	134.376	84.8959	117.342	84.8785	117.116	84.8959	117.42	84.8785	117.099	84.8959	114.392	84.8785	116.335	84.8959	117.424
85.3081	111.536	85.2905	118.368	85.3081	111.616	85.2905	118.375	85.2905	115.454	85.2905	115.452	85.2905	115.451	85.2905	115.453	85.2905	129.152	85.3081	111.917	85.2905	110.932	85.3081	112.006	85.2905	110.929	85.3081	108.64	85.2905	110.066	85.3081	112.01
85.7202	117.787	85.7025	125.005	85.7202	117.863	85.7025	125.012	85.7025	122.418	85.7025	122.417	85.7025	122.417	85.7025	122.418	85.7025	135.368	85.7202	118.248	85.7025	118.02	85.7202	118.328	85.7025	118.003	85.7202	115.266	85.7025	117.231	85.7202	118.333
86.1323	101.722	86.1145	107.149	86.1323	101.815	86.1145	107.161	86.1145	103.25	86.1145	103.258	86.1145	103.252	86.1145	103.265	86.1145	118.959	86.1323	101.921	86.1145	98.3327	86.1323	102.035	86.1145	98.3692	86.1323	97.907	86.1145	97.2089	86.1323	102.04
86.5444	117.822	86.5266	125.042	86.5444	117.897	86.5266	125.049	86.5266	122.421	86.5266	122.419	86.5266	122.419	86.5266	122.42	86.5266	135.453	86.5444	118.273	86.5266	118.009	86.5444	118.353	86.5266	117.995	86.5444	115.257	86.5266	117.211	86.5444	118.358
86.9565	102.6	86.9386	111.249	86.9565	102.661	86.9386	111.253	86.9386	109.361	86.9386	109.361	86.9386	109.359	86.9386	109.359	86.9386	120.611	86.9565	103.271	86.9386	105.198	86.9565	103.324	86.9386	105.159	86.9565	101.018	86.9386	104.552	86.9565	103.328
87.3686	116.983	87.3506	124.178	87.3686	117.059	87.3506	124.184	87.3506	121.513	87.3506	121.512	87.3506	121.511	87.3506	121.513	87.3506	134.644	87.3686	117.424	87.3506	117.086	87.3686	117.505	87.3506	117.073	87.3686	114.367	87.3506	116.279	87.3686	117.51
87.7807	111.154	87.7627	119.077	87.7807	111.225	87.7627	119.085	87.7627	116.756	87.7627	116.752	87.7627	116.754	87.7627	116.755	87.7627	129.091	87.7807	111.688	87.7627	112.448	87.7807	111.761	87.7627	112.422	87.7807	108.972	87.7627	111.716	87.7807	111.766
88.1929	115.091	88.1747	122.21	88.1929	115.167	88.1747	122.216	88.1747	119.481	88.1747	119.479	88.1747	119.479	88.1747	119.479	88.1747	132.763	88.1929	115.512	88.1747	115.03	88.1929	115.596	88.1747	115.02	88.1929	112.393	88.1747	114.208	88.1929	115.601
88.605	114.711	88.5867	122.475	88.605	114.784	88.5867	122.481	88.5867	120.037	88.5867	120.035	88.5867	120.036	88.5867	120.036	88.5867	132.64	88.605	115.214	88.5867	115.69	88.605	115.289	88.5867	115.668	88.605	112.381	88.5867	114.933	88.605	115.293
89.0171	111.526	88.9988	118.441	89.0171	111.607	88.9988	118.448	88.9988	115.575	88.9988	115.573	88.9988	115.574	88.9988	115.575	88.9988	129.156	89.0171	111.914	88.9988	111.075	89.0171	112.003	88.9988	111.07	89.0171	108.665	88.9988	110.223	89.0171	112.007
89.4292	116.481	89.4108	124.185	89.4292	116.555	89.4108	124.191	89.4108	121.688	89.4108	121.686	89.4108	121.686	89.4108	121.687	89.4108	134.434	89.4292	116.967	89.4108	117.32	89.4292	117.044	89.4108	117.3	89.4292	114.075	89.4108	116.55	89.4292	117.048
89.8413	103.55	89.8228	109.428	89.8413	103.64	89.8228	109.436	89.8228	105.899	89.8228	105.901	89.8228	105.9	89.8228	105.903	89.8228	120.873	89.8413	103.801	89.8228	101.149	89.8413	103.906	89.8228	101.171	89.8413	100.011	89.8228	100.13	89.8413	103.911
90.2535	117.15	90.2349	124.832	90.2535	117.225	90.2349	124.838	90.2349	122.294	90.2349	122.292	90.2349	122.293	90.2349	122.293	90.2349	135.142	90.2535	117.623	90.2349	117.912	90.2535	117.701	90.2349	117.894	90.2535	114.688	90.2349	117.134	90.2535	117.706
90.6656	99.4674	90.6469	108.958	90.6656	99.5267	90.6469	108.966	90.6469	107.317	90.6469	107.315	90.6469	107.319	90.6469	107.317	90.6469	117.91	90.6656	100.275	90.6469	103.228	90.6656	100.318	90.6469	103.175	90.6656	98.419	90.6469	102.627	90.6656	100.322
91.0777	116.909	91.0589	124.594	91.0777	116.986	91.0589	124.601	91.0589	122.019	91.0589	122.017	91.0589	122.019	91.0589	122.019	91.0589	134.945	91.0777	117.372	91.0589	117.626	91.0777	117.452	91.0589	117.608	91.0777	114.399	91.0589	116.839	91.0777	117.457
91.4898	110.315	91.471	118.501	91.4898	110.383	91.471	118.507	91.471	116.24	91.471	116.239	91.471	116.238	91.471	116.24	91.471	128.429	91.4898	110.879	91.471	111.95	91.4898	110.947	91.471	111.923	91.4898	108.255	91.471	111.229	91.4898	110.952
91.9019	115.707	91.883	123.42	91.9019	115.783	91.883	123.427	91.883	120.807	91.883	120.805	91.883	120.805	91.883	120.806	91.883	133.821	91.9019	116.158	91.883	116.399	91.9019	116.239	91.883	116.384	91.9019	113.141	91.883	115.604	91.9019	116.243
92.314	114.584	92.295	122.546	92.314	114.657	92.295	122.553	92.295	120.152	92.295	120.151	92.295	120.152	92.295	120.152	92.295	132.663	92.314	115.106	92.295	115.819	92.314	115.179	92.295	115.795	92.314	112.333	92.295	115.071	92.314	115.184
92.7262	113.227	92.707	121.031	92.7262	113.305	92.707	121.038	92.707	118.364	92.707	118.363	92.707	118.364	92.707	118.365	92.707	131.495	92.7262	113.661	92.707	113.941	92.7262	113.744	92.707	113.926	92.7262	110.582	92.707	113.135	92.7262	113.749
93.1383	116.886	93.1191	124.774	93.1383	116.958	93.1191	124.78	93.1191	122.319	93.1191	122.316	93.1191	122.316	93.1191	122.317	93.1191	134.973	93.1383	117.387	93.1191	117.962	93.1383	117.462	93.1191	117.942	93.1383	114.548	93.1191	117.201	93.1383	117.466
93.5504	108.449	93.5311	116.62	93.5504	108.528	93.5311	116.626	93.5311	113.89	93.5311	113.888	93.5311	113.889	93.5311	113.889	93.5311	127.175	93.5504	108.849	93.5311	109.45	93.5504	108.935	93.5311	109.438	93.5504	105.663	93.5311	108.631	93.5504	108.939
93.9625	118.083	93.9431	125.952	93.9625	118.157	93.9431	125.959	93.9431	123.458	93.9431	123.456	93.9431	123.456	93.9431	123.457	93.9431	136.201	93.9625	118.572	93.9431	119.089	93.9625	118.649	93.9431	119.069	93.9625	115.691	93.9431	118.319	93.9625	118.654
94.3746	100.791	94.3552	110.91	94.3746	100.864	94.3552	110.916	94.3552	108.627	94.3552	108.622	94.3552	108.628	94.3552	108.623	94.3552	120.907	94.3746	101.34	94.3552	104.36	94.3746	101.407	94.3552	104.329	94.3746	98.7694	94.3552	103.644	94.3746	101.411
94.7867	118.456	94.7672	126.341	94.7867	118.531	94.7672	126.348	94.7672	123.816	94.7672	123.814	94.7672	123.815	94.7672	123.816	94.7672	136.631	94.7867	118.937	94.7672	119.438	94.7867	119.015	94.7672	119.419	94.7867	116.024	94.7672	118.662	94.7867	119.019
95.1988	108.538	95.1792	116.691	95.1988	108.605	95.1792	116.696	95.1792	114.48	95.1792	114.478	95.1792	114.477	95.1792	114.477	95.1792	126.544	95.1988	109.12	95.1792	110.208	95.1988	109.185	95.1792	110.179	95.1988	106.558	95.1792	109.498	95.1988	109.189
95.611	118.088	95.5913	126.019	95.611	118.161	95.5913	126.026	95.5913	123.469	95.5913	123.467	95.5913	123.467	95.5913	123.468	95.5913	136.341	95.611	118.56	95.5913	119.081	95.611	118.638	95.5913	119.064	95.611	115.62	95.5913	118.299	95.611	118.643
96.0231	113.892	96.0033	121.698	96.0231	113.964	96.0033	121.706	96.0033	119.327	96.0033	119.327	96.0033	119.326	96.0033	119.328	96.0033	131.785	96.0231	114.422	96.0033	115.001	96.0231	114.494	96.0033	114.976	96.0231	111.674	96.0033	114.259	96.0231	114.499
96.4352	116.925	96.4153	124.952	96.4352	117.001	96.4153	124.959	96.4153	122.377	96.4153	122.376	96.4153	122.376	96.4153	122.378	96.4153	135.298	96.4352	117.391	96.4153	117.983	96.4352	117.47	96.4153	117.965	96.4352	114.424	96.4153	117.196	96.4352	117.475
96.8473	116.918	96.8274	124.667	96.8473	116.99	96.8274	124.674	96.8274	122.227	96.8274	122.224	96.8274	122.225	96.8274	122.226	96.8274	134.853	96.8473	117.424	96.8274	117.875	96.8473	117.499	96.8274	117.854	96.8473	114.601	96.8274	117.117	96.8473	117.504
97.2594	114.817	97.2394	123.026	97.2594	114.892	97.2394	123.032	97.2394	120.431	97.2394	120.429	97.2394	120.429	97.2394	120.43	97.2394	133.405	97.2594	115.273	97.2394	116.029	97.2594	115.354	97.2394	116.014	97.2594	112.282	97.2394	115.238	97.2594	115.358
97.6715	118.721	97.6514	126.472	97.6715	118.794	97.6514	126.478	97.6514	123.989	97.6514	123.987	97.6514	123.987	97.6514	123.988	97.6514	136.706	97.6715	119.216	97.6514	119.623	97.6715	119.292	97.6514	119.603	97.6715	116.35	97.6514	118.856	97.6715	119.296
98.0837	111.645	98.0635	120.196	98.0837	111.721	98.0635	120.203	98.0635	117.607	98.0635	117.605	98.0635	117.606	98.0635	117.607	98.0635	130.565	98.0837	112.103	98.0635	113.212	98.0837	112.183	98.0635	113.195	98.0837	109.123	98.0635	112.423	98.0837	112.188
98.4958	119.695	98.4755	127.468	98.4958	119.768	98.4755	127.475	98.4755	124.957	98.4755	124.955	98.4755	124.955	98.4755	124.956	98.4755	137.743	98.4958	120.181	98.4755	120.581	98.4958	120.257	98.4755	120.563	98.4958	117.285	98.4755	119.808	98.4958	120.262
98.9079	109.315	98.8875	117.934	98.9079	109.39	98.8875	117.942	98.8875	115.475	98.8875	115.473	98.8875	115.476	98.8875	115.475	98.8875	128.129	98.9079	109.822	98.8875	111.129	98.9079	109.898	98.8875	111.106	98.9079	107.02	98.8875	110.368	98.9079	109.903
99.32	120.003	99.2995	127.817	99.32	120.077	99.2995	127.823	99.2995	125.282	99.2995	125.281	99.2995	125.281	99.2995	125.282	99.2995	138.119	99.32	120.482	99.2995	120.899	99.32	120.56	99.2995	120.881	99.32	117.563	99.2995	120.121	99.32	120.565
99.7321	111.958	99.7116	119.799	99.7321	112.03	99.7116	119.805	99.7116	117.422	99.7116	117.42	99.7116	117.421	99.7116	117.421	99.7116	129.886	99.7321	112.488	99.7116	113.097	99.7321	112.56	99.7116	113.072	99.7321	109.748	99.7116	112.353	99.7321	112.564
100.144	119.696	100.124	127.569	100.144	119.771	100.124	127.576	100.124	125.014	100.124	125.013	100.124	125.013	100.124	125.014	100.124	137.902	100.144	120.17	100.124	120.624	100.144	120.248	100.124	120.607	100.144	117.229	100.124	119.842	100.144	120.252
100.556	115.521	100.536	123.097	100.556	115.591	100.536	123.104	100.536	120.672	100.536	120.669	100.536	120.669	100.536	120.67	100.536	133.255	100.556	116.031	100.536	116.325	100.556	116.105	100.536	116.304	100.556	113.225	100.536	115.57	100.556	116.11
100.968	118.764	100.948	126.723	100.968	118.838	100.948	126.73	100.948	124.149	100.948	124.148	100.948	124.147	100.948	124.149	100.948	137.077	100.968	119.232	100.948	119.752	100.968	119.311	100.948	119.736	100.968	116.272	100.948	118.965	100.968	119.316
101.381	118.053	101.36	125.607	101.381	118.126	101.36	125.613	101.36	123.135	101.36	123.134	101.36	123.134	101.36	123.135	101.36	135.826	101.381	118.551	101.36	118.773	101.381	118.626	101.36	118.753	101.381	115.696	101.36	118.009	101.381	118.631
101.793	117.156	101.772	125.238	101.793	117.232	101.772	125.245	101.772	122.647	101.772	122.646	101.772	122.646	101.772	122.647	101.772	135.61	101.793	117.619	101.772	118.246	101.793	117.699	101.772	118.23	101.793	114.642	101.772	117.456	101.793	117.703
102.205	119.692	102.184	127.274	102.205	119.766	102.184	127.281	102.184	124.77	102.184	124.769	102.184	124.769	102.184	124.77	102.184	137.539	102.205	120.181	102.184	120.397	102.205	120.258	102.184	120.378	102.205	117.294	102.184	119.626	102.205	120.262
102.617	114.937	102.596	123.161	102.617	115.011	102.596	123.168	102.596	120.566	102.596	120.564	102.596	120.564	102.596	120.565	102.596	133.542	102.617	115.397	102.596	116.164	102.617	115.476	102.596	116.148	102.617	112.419	102.596	115.373	102.617	115.481
103.029	120.635	103.008	128.258	103.029	120.708	103.008	128.264	103.008	125.73	103.008	125.728	103.008	125.728	103.008	125.73	103.008	138.554	103.029	121.116	103.008	121.348	103.029	121.194	103.008	121.33	103.029	118.205	103.008	120.571	103.029	121.199
103.441	113.001	103.42	121.176	103.441	113.074	103.42	121.182	103.42	118.622	103.42	118.62	103.42	118.62	103.42	118.62	103.42	131.502	103.441	113.477	103.42	114.235	103.441	113.554	103.42	114.219	103.441	110.558	103.42	113.453	103.441	113.559
103.853	120.986	103.832	128.658	103.853	121.06	103.832	128.665	103.832	126.11	103.832	126.109	103.832	126.109	103.832	126.11	103.832	138.981	103.853	121.462	103.832	121.722	103.853	121.54	103.832	121.704	103.853	118.529	103.832	120.94	103.853	121.544
104.265	113.559	104.244	121.245	104.265	113.634	104.244	121.252	104.244	118.767	104.244	118.765	104.244	118.768	104.244	118.766	104.244	131.472	104.265	114.058	104.244	114.409	104.265	114.134	104.244	114.386	104.265	111.216	104.244	113.643	104.265	114.139
104.678	120.792	104.656	128.523	104.678	120.867	104.656	128.53	104.656	125.956	104.656	125.955	104.656	125.955	104.656	125.956	104.656	138.869	104.678	121.263	104.656	121.561	104.678	121.341	104.656	121.545	104.678	118.311	104.656	120.776	104.678	121.346
105.09	115.977	105.068	123.372	105.09	116.049	105.068	123.379	105.068	120.903	105.068	120.901	105.068	120.901	105.068	120.901	105.068	133.588	105.09	116.475	105.068	116.542	105.09	116.551	105.068	116.523	105.09	113.627	105.068	115.778	105.09	116.555
105.502	120.053	105.48	127.855	105.502	120.128	105.48	127.862	105.48	125.27	105.48	125.268	105.48	125.268	105.48	125.269	105.48	138.225	105.502	120.518	105.48	120.868	105.502	120.597	105.48	120.853	105.502	117.548	105.48	120.079	105.502	120.602
105.914	118.234	105.892	125.6	105.914	118.308	105.892	125.607	105.892	123.104	105.892	123.103	105.892	123.103	105.892	123.104	105.892	135.856	105.914	118.726	105.892	118.735	105.914	118.802	105.892	118.715	105.914	115.848	105.892	117.965	105.914	118.807
106.326	118.74	106.304	126.627	106.326	118.815	106.304	126.634	106.304	124.023	106.304	124.022	106.304	124.022	106.304	124.023	106.304	137.023	106.326	119.199	106.304	119.616	106.326	119.279	106.304	119.601	106.326	116.211	106.304	118.822	106.326	119.284
106.738	119.85	106.716	127.256	106.738	119.925	106.716	127.263	106.716	124.735	106.716	124.734	106.716	124.734	106.716	124.735	106.716	137.542	106.738	120.334	106.716	120.357	106.738	120.412	106.716	120.337	106.738	117.43	106.716	119.581	106.738	120.416
107.15	116.879	107.128	124.849	107.15	116.954	107.128	124.855	107.128	122.23	107.128	122.228	107.128	122.228	107.128	122.229	107.128	135.259	107.15	117.335	107.128	117.817	107.15	117.414	107.128	117.803	107.15	114.333	107.128	117.02	107.15	117.419
107.562	120.845	107.54	128.304	107.562	120.919	107.54	128.31	107.54	125.761	107.54	125.759	107.54	125.759	107.54	125.761	107.54	138.618	107.562	121.322	107.54	121.374	107.562	121.4	107.54	121.356	107.562	118.396	107.54	120.594	107.562	121.405
107.974	114.861	107.952	122.801	107.974	114.936	107.952	122.807	107.952	120.185	107.952	120.183	107.952	120.183	107.952	120.184	107.952	133.209	107.974	115.319	107.952	115.775	107.974	115.399	107.952	115.761	107.974	112.331	107.952	114.979	107.974	115.404
108.387	121.287	108.364	128.802	108.387	121.362	108.364	128.809	108.364	126.24	108.364	126.238	108.364	126.238	108.364	126.239	108.364	139.143	108.387	121.759	108.364	121.846	108.387	121.838	108.364	121.829	108.387	118.813	108.364	121.061	108.387	121.843
108.799	114.119	108.776	121.698	108.799	114.193	108.776	121.705	108.776	119.135	108.776	119.133	108.776	119.133	108.776	119.134	108.776	132.037	108.799	114.594	108.776	114.745	108.799	114.672	108.776	114.728	108.799	111.666	108.776	113.961	108.799	114.676
109.211	121.211	109.188	128.784	109.211	121.286	109.188	128.791	109.188	126.203	109.188	126.202	109.188	126.201	109.188	126.203	109.188	139.149	109.211	121.678	109.188	121.802	109.211	121.757	109.188	121.787	109.211	118.713	109.188	121.014	109.211	121.761
109.623	115.516	109.6	122.735	109.623	115.59	109.6	122.742	109.6	120.219	109.6	120.217	109.6	120.218	109.6	120.218	109.6	133.015	109.623	116.002	109.6	115.845	109.623	116.079	109.6	115.826	109.623	113.112	109.6	115.071	109.623	116.084
110.035	120.62	110.012	128.256	110.035	120.695	110.012	128.263	110.012	125.656	110.012	125.655	110.012	125.654	110.012	125.656	110.012	138.647	110.035	121.082	110.012	121.248	110.035	121.161	110.012	121.233	110.035	118.097	110.012	120.456	110.035	121.166
110.447	117.565	110.424	124.723	110.447	117.639	110.424	124.729	110.424	122.205	110.424	122.203	110.424	122.203	110.424	122.204	110.424	135.006	110.447	118.05	110.424	117.828	110.447	118.127	110.424	117.81	110.447	115.15	110.424	117.053	110.447	118.131
110.859	119.489	110.836	127.192	110.859	119.563	110.836	127.199	110.836	124.571	110.836	124.57	110.836	124.569	110.836	124.571	110.836	137.611	110.859	119.944	110.836	120.156	110.859	120.024	110.836	120.142	110.859	116.939	110.836	119.358	110.859	120.029
111.271	119.238	111.248	126.448	111.271	119.313	111.248	126.454	111.248	123.911	111.248	123.91	111.248	123.91	111.248	123.911	111.248	136.753	111.271	119.718	111.248	119.527	111.271	119.795	111.248	119.509	111.271	116.797	111.248	118.748	111.271	119.8
111.683	117.788	111.66	125.554	111.683	117.864	111.66	125.56	111.66	122.909	111.66	122.907	111.66	122.907	111.66	122.908	111.66	136.001	111.683	118.237	111.66	118.486	111.683	118.318	111.66	118.473	111.683	115.21	111.66	117.684	111.683	118.323
112.096	120.348	112.073	127.626	112.096	120.422	112.073	127.633	112.073	125.07	112.073	125.068	112.073	125.068	112.073	125.069	112.073	137.961	112.096	120.822	112.073	120.677	112.096	120.9	112.073	120.66	112.096	117.88	112.073	119.894	112.096	120.904
112.508	115.646	112.485	123.404	112.508	115.722	112.485	123.41	112.485	120.739	112.485	120.737	112.485	120.738	112.485	120.738	112.485	133.874	112.508	116.09	112.485	116.311	112.508	116.171	112.485	116.297	112.508	113.049	112.485	115.504	112.508	116.176
112.92	120.91	112.897	128.254	112.92	120.985	112.897	128.261	112.897	125.678	112.897	125.676	112.897	125.676	112.897	125.677	112.897	138.616	112.92	121.379	112.897	121.278	112.92	121.457	112.897	121.262	112.92	118.418	112.897	120.49	112.92	121.462
113.332	113.901	113.309	121.385	113.332	113.977	113.309	121.392	113.309	118.735	113.309	118.733	113.309	118.733	113.309	118.734	113.309	131.833	113.332	114.353	113.309	114.314	113.332	114.433	113.309	114.3	113.332	111.34	113.309	113.511	113.332	114.438
113.744	120.958	113.721	128.363	113.744	121.033	113.721	128.37	113.721	125.767	113.721	125.765	113.721	125.765	113.721	125.766	113.721	138.749	113.744	121.421	113.721	121.361	113.744	121.5	113.721	121.345	113.744	118.441	113.721	120.569	113.744	121.505
114.156	114.175	114.133	121.19	114.156	114.249	114.133	121.196	114.133	118.611	114.133	118.609	114.133	118.609	114.133	118.609	114.133	131.549	114.156	114.645	114.133	114.216	114.156	114.723	114.133	114.2	114.156	111.7	114.133	113.428	114.156	114.727
114.568	120.49	114.545	127.955	114.568	120.566	114.545	127.961	114.545	125.337	114.545	125.336	114.545	125.336	114.545	125.337	114.545	138.368	114.568	120.948	114.545	120.924	114.568	121.028	114.545	120.908	114.568	117.947	114.545	120.127	114.568	121.033
114.98	116.006	114.957	122.898	114.98	116.079	114.957	122.904	114.957	120.353	114.957	120.351	114.957	120.351	114.957	120.352	114.957	133.214	114.98	116.483	114.957	115.968	114.98	116.56	114.957	115.951	114.98	113.558	114.957	115.187	114.98	116.565
115.393	119.478	115.369	127	115.393	119.554	115.369	127.007	115.369	124.358	115.369	124.357	115.369	124.356	115.369	124.358	115.369	137.445	115.393	119.928	115.369	119.936	115.393	120.009	115.369	119.922	115.393	116.904	115.369	119.134	115.393	120.014
115.805	117.832	115.781	124.804	115.805	117.908	115.781	124.81	115.781	122.252	115.781	122.251	115.781	122.251	115.781	122.251	115.781	135.13	115.805	118.307	115.781	117.864	115.805	118.385	115.781	117.845	115.805	115.371	115.781	117.081	115.805	118.39
116.217	117.856	116.193	125.429	116.217	117.932	116.193	125.436	116.193	122.757	116.193	122.755	116.193	122.755	116.193	122.756	116.193	135.913	116.217	118.298	116.193	118.323	116.217	118.38	116.193	118.311	116.217	115.244	116.193	117.514	116.217	118.384
116.629	119.132	116.605	126.202	116.629	119.207	116.605	126.209	116.605	123.631	116.605	123.63	116.605	123.63	116.605	123.632	116.605	136.552	116.629	119.602	116.605	119.235	116.629	119.681	116.605	119.218	116.629	116.647	116.605	118.449	116.629	119.686
117.041	115.577	117.017	123.155	117.041	115.653	117.017	123.161	117.017	120.443	117.017	120.441	117.017	120.441	117.017	120.442	117.017	133.687	117.041	116.008	117.017	115.996	117.041	116.09	117.017	115.986	117.041	112.918	117.017	115.178	117.041	116.095
117.453	119.857	117.429	127.01	117.453	119.932	117.429	127.016	117.429	124.419	117.429	124.417	117.429	124.417	117.429	124.418	117.429	137.389	117.453	120.321	117.429	120.015	117.453	120.4	117.429	119.999	117.453	117.346	117.429	119.224	117.453	120.405
117.865	112.959	117.841	120.326	117.865	113.036	117.841	120.333	117.841	117.578	117.841	117.576	117.841	117.576	117.841	117.578	117.841	130.898	117.865	113.384	117.841	113.122	117.865	113.468	117.841	113.112	117.865	110.276	117.841	112.296	117.865	113.473
118.277	120.032	118.253	127.253	118.277	120.107	118.253	127.259	118.253	124.64	118.253	124.638	118.253	124.638	118.253	124.639	118.253	137.66	118.277	120.491	118.253	120.227	118.277	120.57	118.253	120.212	118.277	117.494	118.253	119.432	118.277	120.575
118.689	111.782	118.665	118.509	118.689	111.858	118.665	118.517	118.665	115.824	118.665	115.821	118.665	115.822	118.665	115.823	118.665	129.005	118.689	112.226	118.665	111.394	118.689	112.307	118.665	111.382	118.689	109.193	118.665	110.583	118.689	112.312
119.102	119.671	119.077	126.948	119.102	119.746	119.077	126.955	119.077	124.311	119.077	124.309	119.077	124.309	119.077	124.31	119.077	137.389	119.102	120.123	119.077	119.889	119.102	120.203	119.077	119.876	119.102	117.102	119.077	119.088	119.102	120.208
119.514	113.343	119.489	119.834	119.514	113.419	119.489	119.841	119.489	117.258	119.489	117.256	119.489	117.258	119.489	117.258	119.489	130.189	119.514	113.811	119.489	112.866	119.514	113.89	119.489	112.849	119.514	110.858	119.489	112.08	119.514	113.895
119.926	118.731	119.901	126.058	119.926	118.808	119.901	126.065	119.901	123.391	119.901	123.39	119.901	123.389	119.901	123.391	119.901	136.535	119.926	119.176	119.901	118.959	119.926	119.257	119.901	118.946	119.926	116.127	119.901	118.152	119.926	119.262
120.338	115.535	120.313	122.204	120.338	115.609	120.313	122.21	120.313	119.644	120.313	119.642	120.313	119.643	120.313	119.643	120.313	132.537	120.338	116.005	120.313	115.254	120.338	116.083	120.313	115.237	120.338	113.057	120.313	114.47	120.338	116.088
120.75	117.124	120.725	124.489	120.75	117.201	120.725	124.495	120.725	121.782	120.725	121.781	120.725	121.78	120.725	121.782	120.725	135.016	120.75	117.558	120.725	117.336	120.75	117.641	120.725	117.324	120.75	114.471	120.725	116.519	120.75	117.646
121.162	117.163	121.137	124.003	121.162	117.239	121.137	124.009	121.137	121.424	121.137	121.423	121.137	121.423	121.137	121.424	121.137	134.363	121.162	117.629	121.137	117.027	121.162	117.708	121.137	117.01	121.162	114.663	121.137	116.239	121.162	117.713
121.574	114.671	121.549	122.037	121.574	114.748	121.549	122.043	121.549	119.269	121.549	119.268	121.549	119.267	121.549	119.268	121.549	132.639	121.574	115.088	121.549	114.801	121.574	115.172	121.549	114.792	121.574	111.944	121.549	113.97	121.574	115.177
121.986	118.112	121.961	125.066	121.986	118.187	121.961	125.073	121.961	122.463	121.961	122.461	121.961	122.461	121.961	122.462	121.961	135.46	121.986	118.571	121.961	118.055	121.986	118.651	121.961	118.04	121.986	115.582	121.961	117.261	121.986	118.656
122.399	111.16	122.373	118.346	122.399	111.239	122.373	118.352	122.373	115.47	122.373	115.471	122.373	115.469	122.373	115.471	122.373	129.073	122.399	111.554	122.373	110.966	122.399	111.64	122.373	110.961	122.399	108.322	122.373	110.111	122.399	111.645
122.811	118.43	122.785	125.461	122.811	118.506	122.785	125.468	122.785	122.831	122.785	122.829	122.785	122.83	122.785	122.83	122.785	135.892	122.811	118.883	122.785	118.413	122.811	118.964	122.785	118.399	122.811	115.869	122.785	117.613	122.811	118.969
123.223	107.744	123.197	113.911	123.223	107.822	123.197	113.917	123.197	110.981	123.197	110.976	123.197	110.977	123.197	110.976	123.197	124.709	123.223	108.133	123.197	106.467	123.223	108.22	123.197	106.466	123.223	104.917	123.197	105.601	123.223	108.224
123.635	118.143	123.609	125.225	123.635	118.22	123.609	125.231	123.609	122.563	123.609	122.562	123.609	122.562	123.609	122.563	123.609	135.694	123.635	118.589	123.609	118.134	123.635	118.67	123.609	118.121	123.635	115.545	123.609	117.328	123.635	118.675
124.047	109.102	124.021	114.92	124.047	109.176	124.021	114.927	124.021	112.358	124.021	112.357	124.021	112.356	124.021	112.358	124.021	125.259	124.047	109.565	124.021	107.981	124.047	109.644	124.021	107.964	124.047	106.604	124.021	107.2	124.047	109.648
124.459	117.215	124.433	124.325	124.459	117.292	124.433	124.331	124.433	121.625	124.433	121.623	124.433	121.623	124.433	121.624	124.433	134.843	124.459	117.65	124.433	117.181	124.459	117.733	124.433	117.169	124.459	114.57	124.433	116.366	124.459	117.738
124.871	112.337	124.845	118.769	124.871	112.411	124.845	118.775	124.845	116.253	124.845	116.251	124.845	116.251	124.845	116.252	124.845	129.045	124.871	112.811	124.845	111.882	124.871	112.889	124.845	111.863	124.871	109.883	124.845	111.109	124.871	112.894
125.283	115.521	125.258	122.635	125.283	115.599	125.258	122.642	125.258	119.88	125.258	119.878	125.258	119.878	125.258	119.879	125.258	133.225	125.283	115.943	125.258	115.416	125.283	116.027	125.258	115.406	125.283	112.811	125.258	114.588	125.283	116.031
125.695	114.572	125.67	121.304	125.695	114.646	125.67	121.31	125.67	118.75	125.67	118.747	125.67	118.748	125.67	118.748	125.67	131.629	125.695	115.039	125.67	114.362	125.695	115.118	125.67	114.345	125.695	112.083	125.67	113.579	125.695	115.122
126.108	112.747	126.082	119.816	126.108	112.827	126.082	119.822	126.082	116.964	126.082	116.964	126.082	116.963	126.082	116.964	126.082	130.523	126.108	113.145	126.082	112.466	126.108	113.232	126.082	112.459	126.108	109.925	126.082	111.616	126.108	113.236
126.52	115.817	126.494	122.69	126.52	115.892	126.494	122.697	126.494	120.095	126.494	120.094	126.494	120.093	126.494	120.095	126.494	133.071	126.52	116.276	126.494	115.691	126.52	116.357	126.494	115.676	126.52	113.286	126.494	114.9	126.52	116.361
126.932	108.054	126.906	114.87	126.932	108.134	126.906	114.876	126.906	111.781	126.906	111.781	126.906	111.777	126.906	111.781	126.906	125.853	126.932	108.395	126.906	107.192	126.932	108.488	126.906	107.198	126.932	104.966	126.906	106.285	126.932	108.492
127.344	116.257	127.318	123.196	127.344	116.333	127.318	123.202	127.318	120.561	127.318	120.559	127.318	120.559	127.318	120.56	127.318	133.629	127.344	116.706	127.318	116.142	127.344	116.787	127.318	116.128	127.344	113.68	127.318	115.342	127.344	116.792
127.756	99.4211	127.73	103.118	127.756	99.5137	127.73	103.124	127.73	98.7078	127.73	98.7062	127.73	98.7096	127.73	98.7062	127.73	115.442	127.756	99.6081	127.73	93.6662	127.756	99.717	127.73	93.7247	127.756	95.668	127.73	92.4312	127.756	99.7217
128.168	115.965	128.142	122.922	128.168	116.041	128.142	122.929	128.142	120.242	128.142	120.24	128.142	120.24	128.142	120.241	128.142	133.414	128.168	116.402	128.142	115.807	128.168	116.484	128.142	115.795	128.168	113.335	128.142	114.996	128.168	116.489
128.58	103.943	128.554	110.561	128.58	104.017	128.554	110.571	128.554	108.527	128.554	108.524	128.554	108.532	128.554	108.528	128.554	120.171	128.58	104.492	128.554	104.334	128.58	104.563	128.554	104.293	128.58	101.868	128.554	103.663	128.58	104.568
128.992	114.907	128.966	121.84	128.992	114.985	128.966	121.847	128.966	119.102	128.966	119.099	128.966	119.1	128.966	119.101	128.966	132.407	128.992	115.33	128.966	114.646	128.992	115.415	128.966	114.635	128.992	112.209	128.966	113.822	128.992	115.419
129.405	109.634	129.378	116.825	129.405	109.707	129.378	116.832	129.378	114.482	129.378	114.481	129.378	114.481	129.378	114.482	129.378	126.864	129.405	110.149	129.378	110.17	129.405	110.222	129.378	110.144	129.405	107.36	129.378	109.434	129.405	110.227
129.817	112.882	129.79	119.723	129.817	112.96	129.79	119.729	129.79	116.891	129.79	116.89	129.79	116.889	129.79	116.891	129.79	130.401	129.817	113.283	129.79	112.4	129.817	113.37	129.79	112.394	129.817	110.08	129.79	111.555	129.817	113.374
130.229	112.474	130.202	119.746	130.229	112.547	130.202	119.753	130.202	117.286	130.202	117.284	130.202	117.284	130.202	117.285	130.202	129.949	130.229	112.962	130.202	112.931	130.229	113.038	130.202	112.91	130.229	110.08	130.202	112.169	130.229	113.043
130.641	109.333	130.614	115.921	130.641	109.416	130.614	115.927	130.614	112.897	130.614	112.897	130.614	112.896	130.614	112.897	130.614	126.831	130.641	109.692	130.614	108.336	130.641	109.783	130.614	108.335	130.641	106.325	130.614	107.445	130.641	109.788
131.053	113.861	131.026	121.152	131.053	113.935	131.026	121.158	131.026	118.62	131.026	118.617	131.026	118.617	131.026	118.618	131.026	131.451	131.053	114.331	131.026	114.238	131.053	114.409	131.026	114.221	131.053	111.385	131.026	113.461	131.053	114.414
131.465	102.057	131.438	107.656	131.465	102.145	131.438	107.663	131.438	103.895	131.438	103.894	131.438	103.888	131.438	103.895	131.438	119.384	131.465	102.269	131.438	99.0205	131.465	102.377	131.438	99.0578	131.465	98.3254	131.438	97.9405	131.465	102.382
131.877	114.254	131.85	121.54	131.877	114.329	131.85	121.547	131.85	118.949	131.85	118.947	131.85	118.948	131.85	118.949	131.85	131.916	131.877	114.709	131.85	114.548	131.877	114.789	131.85	114.532	131.877	111.708	131.85	113.757	131.877	114.794
132.289	94.1226	132.262	105.516	132.289	94.1562	132.262	105.52	132.262	104.274	132.262	104.271	132.262	104.271	132.262	104.27	132.262	113.888	132.289	95.2153	132.262	100.282	132.289	95.2238	132.262	100.222	132.289	94.1437	132.262	99.752	132.289	95.2284
132.701	113.758	132.674	121.018	132.701	113.834	132.674	121.025	132.674	118.366	132.674	118.364	132.674	118.364	132.674	118.365	132.674	131.47	132.701	114.197	132.674	113.943	132.701	114.278	132.674	113.93	132.701	111.136	132.674	113.139	132.701	114.283
133.114	106.331	133.086	114.882	133.114	106.399	133.086	114.89	133.086	112.773	133.086	112.77	133.086	112.773	133.086	112.772	133.086	124.607	133.114	106.943	133.086	108.53	133.114	107.007	133.086	108.495	133.114	104.478	133.086	107.84	133.114	107.012
133.526	112.278	133.498	119.474	133.526	112.356	133.498	119.481	133.498	116.742	133.498	116.739	133.498	116.74	133.498	116.74	133.498	130.031	133.526	112.693	133.498	112.292	133.526	112.778	133.498	112.281	133.526	109.552	133.498	111.469	133.526	112.783
133.938	110.697	133.91	118.827	133.938	110.769	133.91	118.835	133.91	116.509	133.91	116.508	133.91	116.509	133.91	116.51	133.91	128.836	133.938	111.239	133.91	112.2	133.938	111.311	133.91	112.173	133.938	108.535	133.91	111.467	133.938	111.315
134.35	109.386	134.322	116.426	134.35	109.466	134.322	116.433	134.322	113.55	134.322	113.546	134.322	113.547	134.322	113.547	134.322	127.153	134.35	109.761	134.322	109.049	134.35	109.85	134.322	109.045	134.35	106.472	134.322	108.194	134.35	109.854
134.762	112.908	134.734	120.897	134.762	112.982	134.734	120.904	134.734	118.481	134.734	118.48	134.734	118.48	134.734	118.481	134.734	131.041	134.762	113.419	134.734	114.139	134.762	113.494	134.734	114.115	134.762	110.609	134.734	113.386	134.762	113.499
135.174	103.441	135.146	109.946	135.174	103.529	135.146	109.952	135.146	106.615	135.146	106.616	135.146	106.616	135.146	106.617	135.146	121.187	135.174	103.699	135.146	101.965	135.174	103.801	135.146	101.976	135.174	99.9543	135.146	101.004	135.174	103.806
135.586	113.933	135.558	121.87	135.586	114.007	135.558	121.877	135.558	119.392	135.558	119.39	135.558	119.391	135.558	119.391	135.558	132.101	135.586	114.423	135.558	115.028	135.586	114.5	135.558	115.008	135.586	111.545	135.558	114.262	135.586	114.504
135.998	83.2799	135.97	99.18	135.998	83.257	135.97	99.1769	135.97	99.1236	135.97	99.1253	135.97	99.1281	135.97	99.12	135.97	104.62	135.998	85.6477	135.97	95.4789	135.998	85.5265	135.97	95.3813	135.998	87.3151	135.97	95.1245	135.998	85.5313
136.41	114.046	136.382	121.985	136.41	114.121	136.382	121.992	136.382	119.457	136.382	119.455	136.382	119.455	136.382	119.456	136.382	132.28	136.41	114.521	136.382	115.076	136.41	114.599	136.382	115.058	136.41	111.588	136.382	114.299	136.41	114.604
136.823	105.002	136.794	113.573	136.823	105.066	136.794	113.58	136.794	111.552	136.794	111.552	136.794	111.55	136.794	111.554	136.794	123.16	136.823	105.658	136.794	107.334	136.823	105.718	136.794	107.298	136.823	103.313	136.794	106.662	136.823	105.723
137.235	113.297	137.206	121.287	137.235	113.373	137.206	121.294	137.206	118.711	137.206	118.71	137.206	118.71	137.206	118.711	137.206	131.642	137.235	113.756	137.206	114.316	137.235	113.836	137.206	114.299	137.235	110.77	137.206	113.528	137.235	113.841
137.647	110.362	137.618	118.53	137.647	110.432	137.618	118.537	137.618	116.256	137.618	116.256	137.618	116.255	137.618	116.257	137.618	128.486	137.647	110.927	137.618	111.958	137.647	110.995	137.618	111.93	137.647	108.288	137.618	111.234	137.647	111
138.059	111.511	138.03	119.637	138.059	111.588	138.03	119.644	138.03	117.01	138.03	117.009	138.03	117.009	138.03	117.01	138.03	130.058	138.059	111.951	138.03	112.599	138.059	112.034	138.03	112.584	138.059	108.901	138.03	111.801	138.059	112.038
138.471	113.184	138.443	121.239	138.471	113.257	138.443	121.246	138.443	118.86	138.443	118.86	138.443	118.861	138.443	118.862	138.443	131.336	138.471	113.714	138.443	114.529	138.471	113.787	138.443	114.504	138.471	110.96	138.443	113.784	138.471	113.792
138.883	108.212	138.855	116.711	138.883	108.291	138.855	116.718	138.855	114.034	138.855	114.032	138.855	114.034	138.855	114.033	138.855	127.19	138.883	108.626	138.855	109.612	138.883	108.71	138.855	109.598	138.883	105.492	138.855	108.805	138.883	108.715
139.295	114.76	139.267	122.785	139.295	114.833	139.267	122.792	139.267	120.347	139.267	120.345	139.267	120.345	139.267	120.346	139.267	132.967	139.295	115.269	139.267	115.993	139.295	115.344	139.267	115.971	139.295	112.449	139.267	115.235	139.295	115.348
139.707	102.594	139.679	112.356	139.707	102.673	139.679	112.364	139.679	109.786	139.679	109.78	139.679	109.786	139.679	109.783	139.679	122.722	139.707	103.012	139.679	105.417	139.707	103.097	139.679	105.399	139.707	99.9737	139.679	104.638	139.707	103.101
140.12	115.478	140.091	123.519	140.12	115.55	140.091	123.525	140.091	121.036	140.091	121.035	140.091	121.034	140.091	121.035	140.091	133.756	140.12	115.972	140.091	116.668	140.12	116.048	140.091	116.648	140.12	113.105	140.091	115.9	140.12	116.053
140.532	103.025	140.503	112.199	140.532	103.089	140.503	112.205	140.503	110.093	140.503	110.092	140.503	110.092	140.503	110.093	140.503	121.9	140.532	103.673	140.503	105.865	140.532	103.731	140.503	105.831	140.532	101.34	140.503	105.178	140.532	103.736
140.944	115.475	140.915	123.572	140.944	115.549	140.915	123.578	140.915	121.053	140.915	121.052	140.915	121.052	140.915	121.053	140.915	133.854	140.944	115.959	140.915	116.674	140.944	116.037	140.915	116.655	140.944	113.053	140.915	115.899	140.944	116.041
141.356	109.003	141.327	117.001	141.356	109.072	141.327	117.006	141.327	114.762	141.327	114.76	141.327	114.761	141.327	114.76	141.327	126.907	141.356	109.579	141.327	110.476	141.356	109.645	141.327	110.447	141.356	106.983	141.327	109.76	141.356	109.65
141.768	114.779	141.739	122.976	141.768	114.854	141.739	122.983	141.739	120.426	141.739	120.425	141.739	120.425	141.739	120.426	141.739	133.299	141.768	115.252	141.739	116.037	141.768	115.331	141.739	116.019	141.768	112.312	141.739	115.256	141.768	115.335
142.18	112.675	142.151	120.489	142.18	112.746	142.151	120.496	142.151	118.133	142.151	118.131	142.151	118.131	142.151	118.132	142.151	130.56	142.18	113.211	142.151	113.806	142.18	113.282	142.151	113.781	142.18	110.48	142.151	113.065	142.18	113.287
142.592	113.328	142.563	121.698	142.592	113.403	142.563	121.704	142.563	119.12	142.563	119.118	142.563	119.119	142.563	119.119	142.563	132.056	142.592	113.791	142.563	114.723	142.592	113.87	142.563	114.706	142.592	110.819	142.563	113.935	142.592	113.875
143.004	114.918	142.975	122.717	143.004	114.991	142.975	122.723	142.975	120.292	142.975	120.291	142.975	120.291	142.975	120.292	142.975	132.881	143.004	115.433	142.975	115.943	143.004	115.507	142.975	115.921	143.004	112.63	142.975	115.188	143.004	115.512
143.416	111.048	143.387	119.703	143.416	111.123	143.387	119.709	143.387	117.11	143.387	117.108	143.387	117.108	143.387	117.109	143.387	130.078	143.416	111.506	143.387	112.71	143.416	111.586	143.387	112.694	143.416	108.521	143.387	111.919	143.416	111.59
143.829	116.249	143.799	124.076	143.829	116.322	143.799	124.082	143.799	121.606	143.799	121.605	143.799	121.605	143.799	121.606	143.799	134.3	143.829	116.751	143.799	117.241	143.829	116.826	143.799	117.221	143.829	113.901	143.799	116.477	143.829	116.831
144.241	108.445	144.211	117.371	144.241	108.519	144.211	117.377	144.211	114.827	144.211	114.824	144.211	114.825	144.211	114.824	144.211	127.684	144.241	108.923	144.211	110.448	144.241	108.999	144.211	110.43	144.241	106.019	144.211	109.668	144.241	109.003
144.653	116.888	144.623	124.763	144.653	116.961	144.623	124.77	144.623	122.26	144.623	122.258	144.623	122.258	144.623	122.259	144.623	135.031	144.653	117.378	144.623	117.883	144.653	117.454	144.623	117.864	144.653	114.493	144.623	117.112	144.653	117.459
145.065	108.284	145.035	116.688	145.065	108.356	145.035	116.695	145.035	114.286	145.035	114.285	145.035	114.286	145.035	114.286	145.035	126.81	145.065	108.818	145.035	109.956	145.065	108.889	145.035	109.931	145.065	106.095	145.035	109.207	145.065	108.894
145.477	116.928	145.447	124.872	145.477	117.002	145.447	124.879	145.447	122.34	145.447	122.338	145.447	122.338	145.447	122.339	145.447	135.179	145.477	117.409	145.447	117.954	145.477	117.487	145.447	117.936	145.477	114.494	145.447	117.176	145.477	117.491
145.889	111.064	145.859	118.786	145.889	111.135	145.859	118.792	145.859	116.416	145.859	116.415	145.859	116.414	145.859	116.416	145.859	128.866	145.889	111.6	145.859	112.089	145.889	111.672	145.859	112.065	145.889	108.872	145.859	111.346	145.889	111.677
146.301	116.4	146.271	124.438	146.301	116.476	146.271	124.444	146.271	121.879	146.271	121.878	146.271	121.878	146.271	121.879	146.271	134.777	146.301	116.874	146.271	117.485	146.301	116.953	146.271	117.467	146.301	113.932	146.271	116.701	146.301	116.957
146.713	113.805	146.683	121.35	146.713	113.877	146.683	121.357	146.683	118.935	146.683	118.933	146.683	118.933	146.683	118.934	146.683	131.502	146.713	114.323	146.683	114.589	146.713	114.396	146.683	114.567	146.713	111.531	146.683	113.836	146.713	114.401
147.125	115.302	147.095	123.46	147.125	115.378	147.095	123.467	147.095	120.878	147.095	120.876	147.095	120.877	147.095	120.877	147.095	133.83	147.125	115.769	147.095	116.477	147.125	115.848	147.095	116.459	147.125	112.802	147.095	115.687	147.125	115.852
147.538	115.759	147.507	123.307	147.538	115.832	147.507	123.314	147.507	120.847	147.507	120.845	147.507	120.845	147.507	120.847	147.507	133.518	147.538	116.263	147.507	116.485	147.538	116.338	147.507	116.464	147.538	113.422	147.507	115.722	147.538	116.343
147.95	113.649	147.919	121.949	147.95	113.724	147.919	121.955	147.919	119.348	147.919	119.346	147.919	119.346	147.919	119.347	147.919	132.338	147.95	114.11	147.919	114.941	147.95	114.19	147.919	114.926	147.95	111.129	147.919	114.148	147.95	114.194
148.362	117.007	148.331	124.604	148.362	117.081	148.331	124.611	148.331	122.107	148.331	122.106	148.331	122.106	148.331	122.107	148.331	134.865	148.362	117.501	148.331	117.733	148.362	117.577	148.331	117.713	148.362	114.624	148.331	116.962	148.362	117.582
148.774	111.78	148.743	120.142	148.774	111.855	148.743	120.148	148.743	117.546	148.743	117.545	148.743	117.544	148.743	117.545	148.743	130.523	148.774	112.246	148.743	113.144	148.774	112.324	148.743	113.129	148.774	109.285	148.743	112.352	148.774	112.329
149.186	117.66	149.155	125.319	149.186	117.735	149.155	125.326	149.155	122.793	149.155	122.791	149.155	122.791	149.155	122.792	149.155	135.617	149.186	118.145	149.155	118.408	149.186	118.222	149.155	118.389	149.186	115.237	149.155	117.631	149.186	118.227
149.598	110.909	149.567	118.958	149.598	110.983	149.567	118.964	149.567	116.424	149.567	116.421	149.567	116.422	149.567	116.422	149.567	129.259	149.598	111.397	149.567	112.044	149.598	111.473	149.567	112.026	149.598	108.517	149.567	111.266	149.598	111.477
150.01	117.779	149.979	125.509	150.01	117.854	149.979	125.516	149.979	122.956	149.979	122.955	149.979	122.955	149.979	122.956	149.979	135.842	150.01	118.257	149.979	118.563	150.01	118.335	149.979	118.545	150.01	115.323	149.979	117.78	150.01	118.339
150.422	112.065	150.391	119.587	150.422	112.137	150.391	119.594	150.391	117.117	150.391	117.115	150.391	117.115	150.391	117.116	150.391	129.805	150.422	112.57	150.391	112.756	150.422	112.645	150.391	112.737	150.422	109.741	150.391	111.992	150.422	112.649
150.835	117.396	150.803	125.205	150.835	117.471	150.803	125.212	150.803	122.628	150.803	122.626	150.803	122.626	150.803	122.627	150.803	135.57	150.835	117.866	150.803	118.225	150.835	117.944	150.803	118.209	150.835	114.907	150.803	117.437	150.835	117.949
151.247	114.078	151.215	121.385	151.247	114.151	151.215	121.392	151.215	118.917	151.215	118.915	151.215	118.915	151.215	118.916	151.215	131.606	151.247	114.581	151.215	114.554	151.247	114.656	151.215	114.534	151.247	111.738	151.215	113.79	151.247	114.661
151.659	116.512	151.628	124.411	151.659	116.588	151.628	124.418	151.628	121.808	151.628	121.807	151.628	121.807	151.628	121.808	151.628	134.806	151.659	116.976	151.628	117.399	151.659	117.055	151.628	117.383	151.659	113.993	151.628	116.605	151.659	117.06
152.071	115.828	152.04	123.131	152.071	115.901	152.04	123.137	152.04	120.636	152.04	120.635	152.04	120.635	152.04	120.636	152.04	133.385	152.071	116.322	152.04	116.264	152.071	116.398	152.04	116.244	152.071	113.449	152.04	115.494	152.071	116.403
152.483	115.153	152.452	123.135	152.483	115.228	152.452	123.142	152.452	120.51	152.452	120.508	152.452	120.508	152.452	120.509	152.452	133.561	152.483	115.609	152.452	116.092	152.483	115.689	152.452	116.078	152.483	112.605	152.452	115.293	152.483	115.694
152.895	117.053	152.864	124.412	152.895	117.127	152.864	124.419	152.864	121.89	152.864	121.888	152.864	121.888	152.864	121.889	152.864	134.706	152.895	117.539	152.864	117.506	152.895	117.616	152.864	117.488	152.895	114.635	152.864	116.73	152.895	117.621
153.307	113.486	153.276	121.489	153.307	113.562	153.276	121.495	153.276	118.848	153.276	118.846	153.276	118.846	153.276	118.847	153.276	131.928	153.307	113.939	153.276	114.427	153.307	114.019	153.276	114.413	153.307	110.928	153.276	113.626	153.307	114.024
153.719	117.751	153.688	125.18	153.719	117.826	153.688	125.186	153.688	122.631	153.688	122.629	153.688	122.63	153.688	122.63	153.688	135.51	153.719	118.229	153.688	118.238	153.719	118.307	153.688	118.221	153.719	115.299	153.688	117.457	153.719	118.312
154.131	112.168	154.1	119.96	154.131	112.242	154.1	119.966	154.1	117.336	154.1	117.335	154.1	117.334	154.1	117.336	154.1	130.376	154.131	112.63	154.1	112.923	154.131	112.709	154.1	112.909	154.131	109.652	154.1	112.125	154.131	112.714
154.544	117.949	154.512	125.451	154.544	118.024	154.512	125.457	154.512	122.876	154.512	122.875	154.512	122.874	154.512	122.876	154.512	135.812	154.544	118.421	154.512	118.474	154.544	118.499	154.512	118.458	154.544	115.465	154.512	117.687	154.544	118.504
154.956	112.244	154.924	119.58	154.956	112.319	154.924	119.587	154.924	117.015	154.924	117.014	154.924	117.014	154.924	117.015	154.924	129.919	154.956	112.724	154.924	112.624	154.956	112.801	154.924	112.606	154.956	109.807	154.924	111.839	154.956	112.806
155.368	117.675	155.336	125.249	155.368	117.749	155.336	125.255	155.336	122.649	155.336	122.647	155.336	122.647	155.336	122.648	155.336	135.644	155.368	118.139	155.336	118.238	155.368	118.218	155.336	118.223	155.368	115.158	155.336	117.445	155.368	118.223
155.78	113.606	155.748	120.663	155.78	113.68	155.748	120.67	155.748	118.137	155.748	118.135	155.748	118.136	155.748	118.136	155.748	130.956	155.78	114.092	155.748	113.757	155.78	114.169	155.748	113.739	155.78	111.197	155.748	112.98	155.78	114.174
156.192	116.922	156.16	124.567	156.192	116.998	156.16	124.574	156.16	121.941	156.16	121.939	156.16	121.939	156.16	121.94	156.16	134.997	156.192	117.378	156.16	117.521	156.192	117.458	156.16	117.506	156.192	114.372	156.16	116.723	156.192	117.463
156.604	115.182	156.572	122.215	156.604	115.254	156.572	122.222	156.572	119.686	156.572	119.684	156.572	119.683	156.572	119.685	156.572	132.517	156.604	115.665	156.572	115.301	156.604	115.742	156.572	115.284	156.604	112.758	156.572	114.523	156.604	115.747
157.016	115.698	156.984	123.403	157.016	115.774	156.984	123.41	156.984	120.747	156.984	120.746	156.984	120.745	156.984	120.747	156.984	133.867	157.016	116.147	156.984	116.318	157.016	116.228	156.984	116.304	157.016	113.114	156.984	115.512	157.016	116.233
157.428	116.408	157.396	123.509	157.428	116.482	157.396	123.515	157.396	120.959	157.396	120.958	157.396	120.957	157.396	120.959	157.396	133.836	157.428	116.886	157.396	116.567	157.428	116.964	157.396	116.549	157.428	113.957	157.396	115.785	157.428	116.969
157.841	114.071	157.808	121.783	157.841	114.148	157.808	121.789	157.808	119.097	157.808	119.096	157.808	119.096	157.808	119.096	157.808	132.281	157.841	114.512	157.808	114.659	157.841	114.594	157.808	114.646	157.841	111.455	157.808	113.847	157.841	114.599
158.253	117.169	158.22	124.351	158.253	117.243	158.22	124.357	158.22	121.777	158.22	121.775	158.22	121.775	158.22	121.776	158.22	134.713	158.253	117.64	158.22	117.375	158.253	117.718	158.22	117.36	158.253	114.686	158.22	116.588	158.253	117.723
158.665	112.413	158.632	119.959	158.665	112.489	158.632	119.966	158.632	117.26	158.632	117.258	158.632	117.258	158.632	117.259	158.632	130.476	158.665	112.852	158.632	112.819	158.665	112.934	158.632	112.808	158.665	109.795	158.632	112.004	158.665	112.939
159.077	117.445	159.044	124.705	159.077	117.521	159.044	124.711	159.044	122.105	159.044	122.104	159.044	122.104	159.044	122.105	159.044	135.098	159.077	117.91	159.044	117.695	159.077	117.989	159.044	117.679	159.077	114.931	159.044	116.902	159.077	117.994
159.489	111.649	159.456	118.759	159.489	111.724	159.456	118.765	159.456	116.097	159.456	116.094	159.456	116.094	159.456	116.094	159.456	129.227	159.489	112.1	159.456	111.671	159.489	112.18	159.456	111.659	159.489	109.092	159.456	110.865	159.489	112.184
159.901	117.248	159.868	124.577	159.901	117.323	159.868	124.583	159.868	121.95	159.868	121.949	159.868	121.948	159.868	121.95	159.868	135.005	159.901	117.705	159.868	117.53	159.901	117.785	159.868	117.515	159.901	114.7	159.868	116.731	159.901	117.79
160.313	112.361	160.28	119.107	160.313	112.436	160.28	119.114	160.28	116.51	160.28	116.509	160.28	116.509	160.28	116.51	160.28	129.49	160.313	112.829	160.28	112.108	160.313	112.908	160.28	112.093	160.313	109.874	160.28	111.317	160.313	112.913
160.725	116.568	160.692	123.957	160.725	116.645	160.692	123.963	160.692	121.299	160.692	121.298	160.692	121.298	160.692	121.299	160.692	134.425	160.725	117.017	160.692	116.869	160.725	117.098	160.692	116.856	160.725	113.982	160.692	116.064	160.725	117.103
161.137	113.784	161.104	120.489	161.137	113.858	161.104	120.495	161.104	117.918	161.104	117.917	161.104	117.916	161.104	117.917	161.104	130.837	161.137	114.257	161.104	113.522	161.137	114.335	161.104	113.506	161.137	111.312	161.104	112.736	161.137	114.339
161.55	115.385	161.516	122.816	161.55	115.462	161.516	122.823	161.516	120.122	161.516	120.121	161.516	120.12	161.516	120.122	161.516	133.329	161.55	115.825	161.516	115.679	161.55	115.907	161.516	115.667	161.55	112.756	161.516	114.865	161.55	115.912
161.962	115.063	161.928	121.861	161.962	115.138	161.928	121.867	161.928	119.283	161.928	119.28	161.928	119.281	161.928	119.281	161.928	132.226	161.962	115.531	161.928	114.882	161.962	115.61	161.928	114.866	161.962	112.573	161.928	114.094	161.962	115.615
162.374	113.707	162.34	121.129	162.374	113.784	162.34	121.136	162.34	118.391	162.34	118.389	162.34	118.389	162.34	118.39	162.34	131.697	162.374	114.134	162.34	113.933	162.374	114.218	162.34	113.923	162.374	111.027	162.34	113.109	162.374	114.222
162.786	115.903	162.752	122.808	162.786	115.979	162.752	122.814	162.752	120.207	162.752	120.205	162.752	120.205	162.752	120.206	162.752	133.2	162.786	116.367	162.752	115.798	162.786	116.446	162.752	115.782	162.786	113.386	162.752	115.004	162.786	116.451
163.198	111.694	163.164	118.956	163.198	111.772	163.164	118.963	163.164	116.17	163.164	116.168	163.164	116.168	163.164	116.169	163.164	129.577	163.198	112.111	163.164	111.698	163.198	112.196	163.164	111.689	163.198	108.971	163.164	110.864	163.198	112.201
163.61	116.254	163.576	123.247	163.61	116.33	163.576	123.253	163.576	120.619	163.576	120.618	163.576	120.617	163.576	120.618	163.576	133.676	163.61	116.711	163.576	116.199	163.61	116.791	163.576	116.185	163.61	113.704	163.576	115.4	163.61	116.795
164.022	110.111	163.988	116.892	164.022	110.189	163.988	116.898	163.988	114.102	163.988	114.099	163.988	114.1	163.988	114.1	163.988	127.517	164.022	110.531	163.988	109.634	164.022	110.615	163.988	109.626	164.022	107.412	163.988	108.799	164.022	110.62
164.434	116.109	164.4	123.169	164.434	116.185	164.4	123.175	164.4	120.51	164.4	120.508	164.4	120.508	164.4	120.509	164.4	133.64	164.434	116.557	164.4	116.079	164.434	116.638	164.4	116.066	164.434	113.52	164.4	115.273	164.434	116.643
164.846	110.152	164.813	116.426	164.846	110.228	164.813	116.432	164.813	113.734	164.813	113.733	164.813	113.732	164.813	113.733	164.813	126.924	164.846	110.597	164.813	109.304	164.846	110.678	164.813	109.293	164.846	107.564	164.813	108.492	164.846	110.682
165.259	115.441	165.225	122.548	165.259	115.518	165.225	122.554	165.225	119.851	165.225	119.849	165.225	119.849	165.225	119.85	165.225	133.066	165.259	115.879	165.225	115.406	165.259	115.961	165.225	115.394	165.259	112.807	165.225	114.591	165.259	115.966
165.671	111.505	165.637	117.771	165.671	111.582	165.637	117.779	165.637	115.159	165.637	115.159	165.637	115.16	165.637	115.161	165.637	128.166	165.671	111.966	165.637	110.757	165.671	112.046	165.637	110.74	165.671	108.981	165.637	109.963	165.671	112.051
166.083	114.215	166.049	121.34	166.083	114.293	166.049	121.346	166.049	118.594	166.049	118.593	166.049	118.592	166.049	118.593	166.049	131.918	166.083	114.641	166.049	114.132	166.083	114.725	166.049	114.122	166.083	111.525	166.049	113.307	166.083	114.729
166.495	112.942	166.461	119.396	166.495	113.018	166.461	119.403	166.461	116.794	166.461	116.792	166.461	116.792	166.461	116.793	166.461	129.784	166.495	113.403	166.461	112.389	166.495	113.483	166.461	112.373	166.495	110.417	166.461	111.596	166.495	113.487
166.907	112.348	166.873	119.427	166.907	112.427	166.873	119.433	166.873	116.612	166.873	116.611	166.873	116.61	166.873	116.611	166.873	130.087	166.907	112.758	166.873	112.127	166.907	112.843	166.873	112.119	166.907	109.581	166.873	111.286	166.907	112.847
167.319	113.926	167.285	120.542	167.319	114.001	167.285	120.548	167.285	117.918	167.285	117.916	167.285	117.916	167.285	117.917	167.285	130.961	167.319	114.382	167.285	113.502	167.319	114.462	167.285	113.489	167.319	111.374	167.285	112.704	167.319	114.467
167.731	109.838	167.697	116.692	167.731	109.916	167.697	116.698	167.697	113.779	167.697	113.775	167.697	113.776	167.697	113.775	167.697	127.473	167.731	110.221	167.697	109.259	167.731	110.309	167.697	109.258	167.731	106.967	167.697	108.394	167.731	110.314
168.143	114.358	168.109	121.08	168.143	114.434	168.109	121.087	168.109	118.424	168.109	118.422	168.109	118.422	168.109	118.423	168.109	131.543	168.143	114.805	168.109	113.996	168.143	114.886	168.109	113.983	168.143	111.766	168.109	113.191	168.143	114.891
168.556	107.198	168.521	113.359	168.556	107.279	168.521	113.366	168.521	110.35	168.521	110.347	168.521	110.348	168.521	110.348	168.521	124.243	168.556	107.569	168.521	105.809	168.556	107.659	168.521	105.81	168.556	104.28	168.521	104.924	168.556	107.663
168.968	114.213	168.933	120.997	168.968	114.29	168.933	121.003	168.933	118.297	168.933	118.297	168.933	118.296	168.933	118.298	168.933	131.51	168.968	114.651	168.933	113.855	168.968	114.733	168.933	113.843	168.968	111.575	168.933	113.04	168.968	114.738
169.38	106.514	169.345	111.951	169.38	106.592	169.345	111.958	169.345	109.162	169.345	109.158	169.345	109.16	169.345	109.158	169.345	122.582	169.38	106.926	169.345	104.716	169.38	107.01	169.345	104.708	169.38	103.801	169.345	103.887	169.38	107.015
169.792	113.479	169.757	120.277	169.792	113.556	169.757	120.283	169.757	117.528	169.757	117.525	169.757	117.525	169.757	117.526	169.757	130.86	169.792	113.902	169.757	113.065	169.792	113.985	169.757	113.056	169.792	110.779	169.757	112.238	169.792	113.99
170.204	108.253	170.169	114.112	170.204	108.328	170.169	114.119	170.169	111.543	170.169	111.541	170.169	111.541	170.169	111.542	170.169	124.459	170.204	108.706	170.169	107.164	170.204	108.785	170.169	107.148	170.204	105.713	170.169	106.382	170.204	108.79
170.616	112.051	170.581	118.808	170.616	112.13	170.581	118.815	170.581	115.983	170.581	115.981	170.581	115.981	170.581	115.983	170.581	129.481	170.616	112.457	170.581	111.494	170.616	112.543	170.581	111.488	170.616	109.269	170.581	110.65	170.616	112.548
171.028	110.162	170.993	116.477	171.028	110.236	170.993	116.484	170.993	113.919	170.993	113.915	170.993	113.916	170.993	113.916	170.993	126.812	171.028	110.618	170.993	109.533	171.028	110.698	170.993	109.518	171.028	107.634	170.993	108.75	171.028	110.703
171.44	109.762	171.405	116.361	171.44	109.842	171.405	116.368	171.405	113.414	171.405	113.412	171.405	113.411	171.405	113.413	171.405	127.18	171.44	110.139	171.405	108.882	171.44	110.228	171.405	108.88	171.44	106.848	171.405	108.009	171.44	110.232
171.852	111.385	171.817	117.939	171.852	111.46	171.817	117.945	171.817	115.339	171.817	115.336	171.817	115.336	171.817	115.337	171.817	128.324	171.852	111.836	171.817	110.936	171.852	111.916	171.817	110.921	171.852	108.822	171.817	110.143	171.852	111.921
172.265	106.243	172.229	112.348	172.265	106.326	172.229	112.354	172.229	109.153	172.229	109.15	172.229	109.15	172.229	109.15	172.229	123.442	172.265	106.567	172.229	104.535	172.265	106.661	172.229	104.545	172.265	103.091	172.229	103.603	172.265	106.666
172.677	111.877	172.641	118.543	172.677	111.954	172.641	118.55	172.641	115.891	172.641	115.889	172.641	115.889	172.641	115.89	172.641	128.996	172.677	112.318	172.641	111.469	172.677	112.399	172.641	111.456	172.677	109.261	172.641	110.665	172.677	112.404
173.089	101.571	173.053	106.055	173.089	101.656	173.053	106.064	173.053	102.535	173.053	102.526	173.053	102.53	173.053	102.529	173.053	117.548	173.089	101.832	173.053	97.8635	173.089	101.934	173.053	97.8855	173.089	98.1845	173.053	96.8773	173.089	101.938
173.501	111.652	173.465	118.346	173.501	111.73	173.465	118.353	173.465	115.632	173.465	115.63	173.465	115.63	173.465	115.631	173.465	128.877	173.501	112.078	173.465	111.188	173.501	112.161	173.465	111.177	173.501	108.967	173.465	110.37	173.501	112.166
173.913	101.442	173.877	107.256	173.913	101.518	173.877	107.261	173.877	105.104	173.877	105.097	173.877	105.105	173.877	105.097	173.877	117.119	173.913	101.891	173.877	100.903	173.913	101.968	173.877	100.867	173.913	98.988	173.877	100.221	173.913	101.972
174.325	110.66	174.289	117.305	174.325	110.739	174.289	117.311	174.289	114.507	174.289	114.507	174.289	114.505	174.289	114.507	174.289	127.933	174.325	111.066	174.289	110.035	174.325	111.151	174.289	110.027	174.325	107.881	174.289	109.198	174.325	111.156
174.737	105.369	174.701	112.472	174.737	105.439	174.701	112.478	174.701	110.22	174.701	110.217	174.701	110.217	174.701	110.218	174.701	122.388	174.737	105.877	174.701	105.944	174.737	105.95	174.701	105.917	174.737	103.093	174.701	105.228	174.737	105.954
175.149	108.714	175.113	115.192	175.149	108.793	175.113	115.198	175.113	112.265	175.113	112.264	175.113	112.262	175.113	112.265	175.113	125.974	175.149	109.088	175.113	107.748	175.149	109.177	175.113	107.746	175.149	105.788	175.113	106.882	175.149	109.181
175.562	108.042	175.525	115.385	175.562	108.115	175.525	115.391	175.525	112.998	175.525	112.996	175.525	112.998	175.525	112.997	175.525	125.487	175.562	108.534	175.525	108.673	175.562	108.609	175.525	108.648	175.562	105.677	175.525	107.927	175.562	108.614
175.974	105.324	175.937	111.366	175.974	105.409	175.937	111.372	175.937	108.18	175.937	108.178	175.937	108.179	175.937	108.179	175.937	122.445	175.974	105.636	175.937	103.58	175.974	105.732	175.937	103.587	175.974	102.112	175.937	102.653	175.974	105.736
176.386	109.433	176.349	116.841	176.386	109.507	176.349	116.847	176.349	114.362	176.349	114.361	176.349	114.36	176.349	114.362	176.349	127.064	176.386	109.907	176.349	110.002	176.386	109.984	176.349	109.983	176.386	106.978	176.349	109.237	176.386	109.989
176.798	98.9925	176.761	103.819	176.798	99.0871	176.761	103.826	176.761	100.169	176.761	100.167	176.761	100.171	176.761	100.168	176.761	115.512	176.798	99.1416	176.761	95.5202	176.798	99.2541	176.761	95.5381	176.798	95.0449	176.761	94.5381	176.798	99.2587
177.21	109.842	177.173	117.279	177.21	109.918	177.173	117.285	177.173	114.73	177.173	114.727	177.173	114.728	177.173	114.728	177.173	127.6	177.21	110.297	177.173	110.346	177.21	110.376	177.173	110.328	177.21	107.3	177.173	109.564	177.21	110.381
177.622	95.1687	177.585	104.983	177.622	95.2299	177.585	104.993	177.585	103.519	177.585	103.511	177.585	103.519	177.585	103.515	177.585	113.736	177.622	95.8322	177.585	99.506	177.622	95.8856	177.585	99.4501	177.622	93.8121	177.585	98.9431	177.622	95.8901
178.034	109.361	177.998	116.822	178.034	109.437	177.998	116.829	177.998	114.204	177.998	114.201	177.998	114.201	177.998	114.202	177.998	127.23	178.034	109.794	177.998	109.797	178.034	109.877	177.998	109.783	178.034	106.725	177.998	109.001	178.034	109.881
178.446	102.909	178.41	111.89	178.446	102.973	178.41	111.898	178.41	109.881	178.41	109.878	178.41	109.879	178.41	109.881	178.41	121.454	178.446	103.543	178.41	105.671	178.446	103.604	178.41	105.634	178.446	101.167	178.41	105	178.446	103.609
178.858	107.894	178.822	115.404	178.858	107.971	178.822	115.411	178.822	112.713	178.822	112.71	178.822	112.711	178.822	112.711	178.822	125.903	178.858	108.299	178.822	108.285	178.858	108.384	178.822	108.274	178.858	105.138	178.822	107.474	178.858	108.389
179.271	106.91	179.234	115.433	179.271	106.979	179.234	115.441	179.234	113.203	179.234	113.201	179.234	113.201	179.234	113.203	179.234	125.327	179.271	107.475	179.234	108.919	179.271	107.544	179.234	108.89	179.271	104.856	179.234	108.204	179.271	107.549
179.683	105.084	179.646	112.781	179.683	105.163	179.646	112.789	179.646	110.022	179.646	110.019	179.646	110.018	179.646	110.02	179.646	123.369	179.683	105.448	179.646	105.581	179.683	105.538	179.646	105.573	179.683	102.154	179.646	104.757	179.683	105.543
180.095	109.038	180.058	117.391	180.095	109.111	180.058	117.397	180.058	115.044	180.058	115.043	180.058	115.044	180.058	115.044	180.058	127.442	180.095	109.569	180.058	110.724	180.095	109.64	180.058	110.697	180.095	106.824	180.058	109.985	180.095	109.645
180.507	100.295	180.47	109.034	180.507	100.378	180.47	109.04	180.47	106.427	180.47	106.422	180.47	106.426	180.47	106.423	180.47	119.47	180.507	100.623	180.47	102.07	180.507	100.714	180.47	102.053	180.507	97.29	180.47	101.291	180.507	100.719
180.919	110.042	180.882	118.344	180.919	110.114	180.882	118.351	180.882	115.924	180.882	115.922	180.882	115.922	180.882	115.923	180.882	128.497	180.919	110.547	180.882	111.578	180.919	110.622	180.882	111.556	180.919	107.722	180.882	110.824	180.919	110.627
181.331	98.1916	181.294	108.666	181.331	98.2546	181.294	108.673	181.294	106.694	181.294	106.691	181.294	106.693	181.294	106.693	181.294	118.188	181.331	98.8496	181.294	102.521	181.331	98.9049	181.294	102.482	181.331	96.6505	181.294	101.864	181.331	98.9095
181.743	110.187	181.706	118.523	181.743	110.261	181.706	118.53	181.706	116.048	181.706	116.046	181.706	116.046	181.706	116.048	181.706	128.746	181.743	110.675	181.706	111.685	181.743	110.752	181.706	111.664	181.743	107.788	181.706	110.919	181.743	110.757
182.155	103.743	182.118	112.849	182.155	103.808	182.118	112.856	182.118	110.778	182.118	110.776	182.118	110.777	182.118	110.777	182.118	122.509	182.155	104.387	182.118	106.547	182.155	104.447	182.118	106.512	182.155	102.022	182.118	105.864	182.155	104.452
182.567	109.539	182.53	117.997	182.567	109.612	182.53	118.003	182.53	115.48	182.53	115.477	182.53	115.478	182.53	115.478	182.53	128.277	182.567	110.01	182.53	111.104	182.567	110.088	182.53	111.086	182.567	107.074	182.53	110.329	182.567	110.093
182.98	107.67	182.942	116.213	182.98	107.74	182.942	116.22	182.942	113.978	182.942	113.977	182.942	113.978	182.942	113.979	182.942	126.114	182.98	108.252	182.942	109.691	182.98	108.32	182.942	109.66	182.98	105.67	182.942	108.975	182.98	108.324
183.392	108.092	183.354	116.802	183.392	108.168	183.354	116.808	183.354	114.26	183.354	114.258	183.354	114.259	183.354	114.259	183.354	127.111	183.392	108.552	183.354	109.88	183.392	108.631	183.354	109.862	183.392	105.583	183.354	109.101	183.392	108.636
183.804	110.045	183.766	118.393	183.804	110.115	183.766	118.4	183.766	116.06	183.766	116.058	183.766	116.058	183.766	116.059	183.766	128.437	183.804	110.59	183.766	111.737	183.804	110.66	183.766	111.712	183.804	107.889	183.766	111.001	183.804	110.665
184.216	105.935	184.178	115.088	184.216	106.007	184.178	115.093	184.178	112.57	184.178	112.567	184.178	112.567	184.178	112.567	184.178	125.364	184.216	106.398	184.178	108.201	184.216	106.476	184.178	108.183	184.216	103.461	184.178	107.428	184.216	106.48
184.628	111.427	184.59	119.719	184.628	111.499	184.59	119.726	184.59	117.319	184.59	117.317	184.59	117.318	184.59	117.318	184.59	129.853	184.628	111.949	184.59	112.976	184.628	112.023	184.59	112.952	184.628	109.174	184.59	112.225	184.628	112.028
185.04	104.258	185.002	113.748	185.04	104.328	185.002	113.755	185.002	111.358	185.002	111.355	185.002	111.356	185.002	111.356	185.002	123.856	185.04	104.779	185.002	107.035	185.04	104.851	185.002	107.012	185.04	102.055	185.002	106.289	185.04	104.856
185.452	112.057	185.414	120.364	185.452	112.13	185.414	120.371	185.414	117.914	185.414	117.913	185.414	117.913	185.414	117.914	185.414	130.562	185.452	112.565	185.414	113.555	185.452	112.639	185.414	113.534	185.452	109.736	185.414	112.794	185.452	112.644
185.864	105.472	185.826	114.398	185.864	105.54	185.826	114.404	185.826	112.129	185.826	112.126	185.826	112.127	185.826	112.127	185.826	124.341	185.864	106.049	185.826	107.838	185.864	106.115	185.826	107.81	185.864	103.48	185.826	107.116	185.864	106.12
186.277	112.055	186.238	120.428	186.277	112.129	186.238	120.435	186.238	117.941	186.238	117.939	186.238	117.94	186.238	117.94	186.238	130.675	186.277	112.549	186.238	113.57	186.277	112.626	186.238	113.549	186.277	109.679	186.238	112.801	186.277	112.631
186.689	108.244	186.65	116.555	186.689	108.313	186.65	116.561	186.65	114.263	186.65	114.262	186.65	114.261	186.65	114.263	186.65	126.533	186.689	108.81	186.65	109.957	186.689	108.879	186.65	109.931	186.689	106.179	186.65	109.23	186.689	108.883
187.101	111.475	187.062	119.964	187.101	111.549	187.062	119.97	187.062	117.446	187.062	117.445	187.062	117.444	187.062	117.446	187.062	130.247	187.101	111.96	187.062	113.066	187.101	112.037	187.062	113.047	187.101	109.059	187.062	112.29	187.101	112.042
187.513	110.612	187.474	118.675	187.513	110.683	187.474	118.681	187.474	116.32	187.474	116.319	187.474	116.319	187.474	116.32	187.474	128.746	187.513	111.154	187.474	111.992	187.513	111.225	187.474	111.966	187.513	108.439	187.474	111.251	187.513	111.23
187.925	110.392	187.886	119.039	187.925	110.465	187.886	119.045	187.886	116.505	187.886	116.502	187.886	116.503	187.886	116.503	187.886	129.344	187.925	110.87	187.886	112.12	187.925	110.948	187.886	112.103	187.925	107.955	187.886	111.341	187.925	110.952
188.337	112.275	188.298	120.267	188.337	112.348	188.298	120.274	188.298	117.857	188.298	117.856	188.298	117.856	188.298	117.857	188.298	130.416	188.337	112.799	188.298	113.509	188.337	112.872	188.298	113.486	188.337	110.019	188.298	112.757	188.337	112.877
188.749	109.056	188.71	117.843	188.749	109.13	188.71	117.85	188.71	115.317	188.71	115.314	188.71	115.316	188.71	115.316	188.71	128.135	188.749	109.54	188.71	110.938	188.749	109.617	188.71	110.919	188.749	106.649	188.71	110.161	188.749	109.622
189.161	113.291	189.122	121.289	189.161	113.363	189.122	121.295	189.122	118.834	189.122	118.833	189.122	118.833	189.122	118.834	189.122	131.497	189.161	113.8	189.122	114.471	189.161	113.875	189.122	114.45	189.161	110.972	189.122	113.709	189.161	113.879
189.573	108.256	189.534	116.946	189.573	108.328	189.534	116.952	189.534	114.468	189.534	114.467	189.534	114.466	189.534	114.468	189.534	127.17	189.573	108.764	189.534	110.107	189.573	108.838	189.534	110.087	189.573	105.951	189.534	109.341	189.573	108.843
189.986	113.752	189.946	121.794	189.986	113.825	189.946	121.8	189.946	119.303	189.946	119.301	189.946	119.301	189.946	119.302	189.946	132.05	189.986	114.249	189.946	114.927	189.986	114.325	189.946	114.908	189.986	111.382	189.946	114.158	189.986	114.33
190.398	108.891	190.358	117.135	190.398	108.962	190.358	117.142	190.358	114.72	190.358	114.717	190.358	114.718	190.358	114.718	190.358	127.282	190.398	109.418	190.358	110.377	190.398	109.491	190.358	110.354	190.398	106.669	190.358	109.623	190.398	109.496
190.81	113.705	190.77	121.817	190.81	113.779	190.77	121.824	190.77	119.295	190.77	119.293	190.77	119.293	190.77	119.294	190.77	132.114	190.81	114.192	190.77	114.909	190.81	114.269	190.77	114.89	190.81	111.293	190.77	114.133	190.81	114.274
191.222	110.544	191.183	118.397	191.222	110.616	191.183	118.404	191.183	115.992	191.183	115.991	191.183	115.991	191.183	115.991	191.183	128.533	191.222	111.072	191.183	111.649	191.222	111.143	191.183	111.626	191.222	108.313	191.183	110.898	191.222	111.148
191.634	113.19	191.595	121.392	191.634	113.265	191.595	121.398	191.595	118.842	191.595	118.841	191.595	118.841	191.595	118.841	191.595	131.723	191.634	113.67	191.595	114.448	191.634	113.747	191.595	114.431	191.634	110.744	191.595	113.666	191.634	113.752
192.046	112.237	192.007	119.929	192.046	112.31	192.007	119.936	192.007	117.498	192.007	117.497	192.007	117.497	192.007	117.498	192.007	130.104	192.046	112.755	192.007	113.144	192.046	112.829	192.007	113.122	192.046	109.957	192.007	112.387	192.046	112.834
192.458	112.276	192.419	120.57	192.458	112.351	192.419	120.576	192.419	117.999	192.419	117.998	192.419	117.998	192.419	117.999	192.419	130.925	192.458	112.75	192.419	113.6	192.458	112.828	192.419	113.583	192.458	109.808	192.419	112.813	192.458	112.833
192.87	113.551	192.831	121.216	192.87	113.624	192.831	121.222	192.831	118.75	192.831	118.748	192.831	118.748	192.831	118.749	192.831	131.44	192.87	114.057	192.831	114.382	192.87	114.132	192.831	114.362	192.87	111.219	192.831	113.618	192.87	114.137
193.282	111.164	193.243	119.492	193.282	111.238	193.243	119.499	193.243	116.916	193.243	116.914	193.243	116.914	193.243	116.915	193.243	129.854	193.282	111.638	193.243	112.516	193.282	111.715	193.243	112.5	193.282	108.699	193.243	111.728	193.282	111.72
193.695	114.392	193.655	122.087	193.695	114.465	193.655	122.094	193.655	119.587	193.655	119.586	193.655	119.585	193.655	119.587	193.655	132.356	193.695	114.888	193.655	115.208	193.695	114.964	193.655	115.189	193.695	112.014	193.655	114.436	193.695	114.969
194.107	110.353	194.067	118.539	194.107	110.427	194.067	118.545	194.067	115.982	194.067	115.981	194.067	115.981	194.067	115.982	194.067	128.87	194.107	110.838	194.067	111.592	194.107	110.914	194.067	111.574	194.107	107.935	194.067	110.808	194.107	110.919
194.519	114.769	194.479	122.521	194.519	114.843	194.479	122.528	194.479	119.99	194.479	119.989	194.479	119.988	194.479	119.99	194.479	132.831	194.519	115.255	194.479	115.6	194.519	115.333	194.479	115.582	194.519	112.349	194.479	114.822	194.519	115.337
194.931	110.496	194.891	118.318	194.931	110.569	194.891	118.325	194.891	115.806	194.891	115.804	194.891	115.805	194.891	115.805	194.891	128.593	194.931	110.994	194.891	111.43	194.931	111.069	194.891	111.411	194.931	108.139	194.891	110.656	194.931	111.074
195.343	114.703	195.303	122.525	195.343	114.777	195.303	122.531	195.303	119.964	195.303	119.963	195.303	119.963	195.303	119.964	195.303	132.872	195.343	115.181	195.303	115.565	195.343	115.259	195.303	115.548	195.343	112.246	195.303	114.78	195.343	115.264
195.755	111.548	195.715	119.041	195.755	111.621	195.715	119.048	195.715	116.556	195.715	116.554	195.715	116.554	195.715	116.555	195.715	129.283	195.755	112.052	195.715	112.186	195.755	112.127	195.715	112.167	195.755	109.211	195.715	111.418	195.755	112.132
196.167	114.209	196.127	122.105	196.167	114.284	196.127	122.112	196.127	119.518	196.127	119.516	196.127	119.516	196.127	119.517	196.127	132.489	196.167	114.679	196.127	115.109	196.167	114.757	196.127	115.093	196.167	111.717	196.127	114.319	196.167	114.762
196.579	112.879	196.539	120.237	196.579	112.952	196.539	120.244	196.539	117.746	196.539	117.745	196.539	117.744	196.539	117.747	196.539	130.488	196.579	113.38	196.539	113.372	196.579	113.456	196.539	113.353	196.579	110.523	196.539	112.603	196.579	113.461
196.992	113.328	196.951	121.289	196.992	113.404	196.951	121.295	196.951	118.675	196.951	118.673	196.951	118.673	196.951	118.674	196.951	131.702	196.992	113.792	196.951	114.259	196.992	113.871	196.951	114.244	196.992	110.807	196.951	113.463	196.992	113.876
197.404	114.018	197.363	121.368	197.404	114.092	197.363	121.374	197.363	118.856	197.363	118.854	197.363	118.854	197.363	118.855	197.363	131.652	197.404	114.511	197.363	114.473	197.404	114.587	197.363	114.454	197.404	111.627	197.363	113.698	197.404	114.592
197.816	112.203	197.775	120.169	197.816	112.279	197.775	120.176	197.775	117.537	197.775	117.535	197.775	117.536	197.775	117.536	197.775	130.604	197.816	112.662	197.775	113.117	197.816	112.742	197.775	113.102	197.816	109.667	197.775	112.316	197.816	112.747
198.228	114.781	198.187	122.177	198.228	114.854	198.187	122.183	198.187	119.637	198.187	119.636	198.187	119.635	198.187	119.636	198.187	132.499	198.228	115.266	198.187	115.244	198.228	115.343	198.187	115.227	198.228	112.352	198.187	114.463	198.228	115.347
198.64	111.194	198.599	119.013	198.64	111.269	198.599	119.019	198.599	116.382	198.599	116.38	198.599	116.38	198.599	116.381	198.599	129.442	198.64	111.656	198.599	111.964	198.64	111.735	198.599	111.95	198.64	108.676	198.599	111.164	198.64	111.74
199.052	115.127	199.011	122.588	199.052	115.202	199.011	122.594	199.011	120.02	199.011	120.018	199.011	120.018	199.011	120.019	199.011	132.948	199.052	115.603	199.011	115.617	199.052	115.681	199.011	115.6	199.052	112.66	199.011	114.831	199.052	115.685
199.464	110.886	199.423	118.359	199.464	110.96	199.423	118.366	199.423	115.76	199.423	115.759	199.423	115.759	199.423	115.76	199.423	128.743	199.464	111.36	199.423	111.355	199.464	111.438	199.423	111.34	199.464	108.421	199.423	110.563	199.464	111.443
199.876	115.048	199.835	122.581	199.876	115.124	199.835	122.588	199.835	119.983	199.835	119.981	199.835	119.982	199.835	119.982	199.835	132.979	199.876	115.515	199.835	115.57	199.876	115.595	199.835	115.554	199.876	112.543	199.835	114.777	199.876	115.6
200.288	111.533	200.247	118.668	200.288	111.607	200.247	118.674	200.247	116.11	200.247	116.109	200.247	116.108	200.247	116.109	200.247	129	200.288	112.018	200.247	111.717	200.288	112.094	200.247	111.701	200.288	109.11	200.247	110.934	200.288	112.099
200.701	114.548	200.659	122.15	200.701	114.624	200.659	122.156	200.659	119.52	200.659	119.519	200.659	119.519	200.659	119.52	200.659	132.586	200.701	115.008	200.659	115.097	200.701	115.087	200.659	115.083	200.701	112.006	200.659	114.298	200.701	115.092
201.113	112.659	201.071	119.655	201.113	112.732	201.071	119.662	201.071	117.112	201.071	117.11	201.071	117.11	201.071	117.111	201.071	129.974	201.113	113.143	201.071	112.722	201.113	113.221	201.071	112.704	201.113	110.236	201.071	111.941	201.113	113.225
201.525	113.635	201.483	121.288	201.525	113.711	201.483	121.294	201.483	118.626	201.483	118.624	201.483	118.624	201.483	118.625	201.483	131.765	201.525	114.085	201.483	114.192	201.525	114.166	201.483	114.179	201.525	111.054	201.483	113.385	201.525	114.171
201.937	113.732	201.895	120.741	201.937	113.806	201.895	120.748	201.895	118.186	201.895	118.185	201.895	118.185	201.895	118.186	201.895	131.077	201.937	114.213	201.895	113.791	201.937	114.291	201.895	113.773	201.937	111.288	201.895	113.007	201.937	114.296
202.349	112.385	202.307	120.033	202.349	112.462	202.307	120.04	202.307	117.338	202.307	117.336	202.307	117.336	202.307	117.338	202.307	130.547	202.349	112.827	202.307	112.895	202.349	112.91	202.307	112.883	202.349	109.771	202.307	112.081	202.349	112.914
202.761	114.489	202.719	121.566	202.761	114.564	202.719	121.573	202.719	118.988	202.719	118.987	202.719	118.987	202.719	118.988	202.719	131.935	202.761	114.963	202.719	114.584	202.761	115.042	202.719	114.567	202.761	112.012	202.719	113.795	202.761	115.046
203.173	111.057	203.131	118.553	203.173	111.134	203.131	118.56	203.131	115.838	203.131	115.836	203.131	115.836	203.131	115.837	203.131	129.09	203.173	111.496	203.131	111.39	203.173	111.578	203.131	111.379	203.173	108.434	203.131	110.572	203.173	111.583
203.585	114.843	203.543	122	203.585	114.918	203.543	122.006	203.543	119.394	203.543	119.392	203.543	119.392	203.543	119.393	203.543	132.407	203.585	115.309	203.543	114.978	203.585	115.388	203.543	114.963	203.585	112.33	203.543	114.183	203.585	115.393
203.998	110.251	203.956	117.364	203.998	110.326	203.956	117.37	203.956	114.666	203.956	114.664	203.956	114.664	203.956	114.664	203.956	127.874	203.998	110.698	203.956	110.227	203.998	110.779	203.956	110.216	203.998	107.67	203.956	109.413	203.998	110.783
204.41	114.769	204.368	122.002	204.41	114.845	204.368	122.009	204.368	119.364	204.368	119.362	204.368	119.362	204.368	119.363	204.368	132.451	204.41	115.226	204.368	114.937	204.41	115.307	204.368	114.923	204.41	112.216	204.368	114.135	204.41	115.311
204.822	110.512	204.78	117.208	204.822	110.588	204.78	117.215	204.78	114.57	204.78	114.568	204.78	114.568	204.78	114.569	204.78	127.643	204.822	110.975	204.78	110.153	204.822	111.054	204.78	110.139	204.822	107.998	204.78	109.353	204.822	111.059
205.234	114.245	205.192	121.543	205.234	114.321	205.192	121.55	205.192	118.868	205.192	118.866	205.192	118.866	205.192	118.867	205.192	132.038	205.234	114.691	205.192	114.429	205.234	114.773	205.192	114.416	205.234	111.646	205.192	113.619	205.234	114.778
205.646	111.551	205.604	118.1	205.646	111.624	205.604	118.107	205.604	115.506	205.604	115.503	205.604	115.502	205.604	115.504	205.604	128.484	205.646	112.021	205.604	111.099	205.646	112.099	205.604	111.085	205.646	109.066	205.604	110.308	205.646	112.104
206.058	113.252	206.016	120.594	206.058	113.329	206.016	120.6	206.016	117.874	206.016	117.874	206.016	117.873	206.016	117.875	206.016	131.14	206.058	113.689	206.016	113.421	206.058	113.771	206.016	113.409	206.058	110.604	206.016	112.601	206.058	113.776
206.47	112.675	206.428	119.281	206.47	112.75	206.428	119.288	206.428	116.689	206.428	116.687	206.428	116.688	206.428	116.687	206.428	129.666	206.47	113.143	206.428	112.283	206.47	113.222	206.428	112.267	206.47	110.18	206.428	111.491	206.47	113.227
206.882	111.797	206.84	119.123	206.882	111.875	206.84	119.13	206.84	116.352	206.84	116.35	206.84	116.35	206.84	116.351	206.84	129.734	206.882	112.219	206.84	111.881	206.882	112.303	206.84	111.872	206.882	109.09	206.84	111.05	206.882	112.308
207.294	113.508	207.252	120.227	207.294	113.583	207.252	120.234	207.252	117.614	207.252	117.612	207.252	117.612	207.252	117.613	207.252	130.638	207.294	113.971	207.252	113.198	207.294	114.051	207.252	113.183	207.294	110.985	207.252	112.402	207.294	114.056
207.707	110.017	207.664	117.169	207.707	110.095	207.664	117.175	207.664	114.339	207.664	114.337	207.664	114.337	207.664	114.338	207.664	127.844	207.707	110.427	207.664	109.851	207.707	110.512	207.664	109.845	207.707	107.261	207.664	109.007	207.707	110.517
208.119	113.917	208.076	120.741	208.119	113.993	208.076	120.747	208.076	118.097	208.076	118.095	208.076	118.096	208.076	118.096	208.076	131.194	208.119	114.372	208.076	113.67	208.119	114.453	208.076	113.656	208.119	111.355	208.076	112.867	208.119	114.457
208.531	108.496	208.488	115.147	208.531	108.574	208.488	115.153	208.488	112.297	208.488	112.293	208.488	112.294	208.488	112.294	208.488	125.842	208.531	108.906	208.488	107.809	208.531	108.991	208.488	107.803	208.531	105.753	208.488	106.96	208.531	108.996
208.943	113.858	208.9	120.767	208.943	113.935	208.9	120.774	208.9	118.084	208.9	118.084	208.9	118.083	208.9	118.084	208.9	131.268	208.943	114.304	208.9	113.644	208.943	114.385	208.9	113.631	208.943	111.252	208.9	112.832	208.943	114.39
209.355	108.277	209.312	114.31	209.355	108.353	209.312	114.315	209.312	111.557	209.312	111.554	209.312	111.555	209.312	111.554	209.312	124.885	209.355	108.711	209.312	107.11	209.355	108.792	209.312	107.101	209.355	105.646	209.312	106.285	209.355	108.797
209.767	113.302	209.724	120.27	209.767	113.379	209.724	120.277	209.724	117.541	209.724	117.54	209.724	117.54	209.724	117.541	209.724	130.831	209.767	113.735	209.724	113.084	209.767	113.818	209.724	113.073	209.767	110.64	209.724	112.262	209.767	113.822
210.179	109.384	210.136	115.318	210.179	109.46	210.136	115.325	210.136	112.681	210.136	112.679	210.136	112.679	210.136	112.68	210.136	125.75	210.179	109.84	210.136	108.271	210.179	109.92	210.136	108.257	210.179	106.84	210.136	107.471	210.179	109.924
210.591	112.183	210.548	119.174	210.591	112.26	210.548	119.18	210.548	116.385	210.548	116.383	210.548	116.383	210.548	116.383	210.548	129.811	210.591	112.599	210.548	111.906	210.591	112.683	210.548	111.898	210.591	109.45	210.548	111.07	210.591	112.688
211.004	110.778	210.96	116.926	211.004	110.853	210.96	116.934	210.96	114.316	210.96	114.314	210.96	114.314	210.96	114.315	210.96	127.326	211.004	111.236	210.96	109.908	211.004	111.316	210.96	109.894	211.004	108.243	210.96	109.114	211.004	111.321
211.416	110.421	211.372	117.367	211.416	110.501	211.372	117.373	211.372	114.489	211.372	114.488	211.372	114.488	211.372	114.489	211.372	128.103	211.416	110.818	211.372	109.981	211.416	110.905	211.372	109.976	211.416	107.594	211.372	109.126	211.416	110.909
211.828	111.819	211.784	118.179	211.828	111.894	211.784	118.185	211.784	115.547	211.784	115.544	211.784	115.545	211.784	115.545	211.784	128.611	211.828	112.271	211.784	111.128	211.828	112.352	211.784	111.115	211.828	109.255	211.784	110.328	211.828	112.357
212.24	107.96	212.196	114.66	212.24	108.04	212.196	114.666	212.196	111.647	212.196	111.645	212.196	111.644	212.196	111.645	212.196	125.55	212.24	108.327	212.196	107.094	212.24	108.416	212.196	107.096	212.24	105.003	212.196	106.206	212.24	108.421
212.652	112.338	212.608	118.845	212.652	112.415	212.608	118.851	212.608	116.172	212.608	116.17	212.608	116.171	212.608	116.171	212.608	129.329	212.652	112.782	212.608	111.739	212.652	112.863	212.608	111.725	212.652	109.729	212.608	110.929	212.652	112.868
213.064	105.179	213.02	111.032	213.064	105.259	213.02	111.038	213.02	107.854	213.02	107.85	213.02	107.85	213.02	107.85	213.02	122.101	213.064	105.52	213.02	103.258	213.064	105.612	213.02	103.268	213.064	102.133	213.02	102.333	213.064	105.616
213.476	112.303	213.432	118.898	213.476	112.381	213.432	118.905	213.432	116.173	213.432	116.172	213.432	116.172	213.432	116.174	213.432	129.448	213.476	112.735	213.432	111.721	213.476	112.819	213.432	111.71	213.476	109.638	213.432	110.9	213.476	112.823
213.888	104.198	213.844	108.946	213.888	104.276	213.844	108.951	213.844	106.065	213.844	106.06	213.844	106.064	213.844	106.06	213.844	119.696	213.888	104.591	213.844	101.614	213.888	104.675	213.844	101.608	213.888	101.416	213.844	100.772	213.888	104.68
214.3	111.672	214.256	118.299	214.3	111.751	214.256	118.306	214.256	115.509	214.256	115.506	214.256	115.507	214.256	115.507	214.256	128.933	214.3	112.087	214.256	111.032	214.3	112.172	214.256	111.024	214.3	108.931	214.256	110.196	214.3	112.177
214.713	106.035	214.668	111.425	214.713	106.109	214.668	111.431	214.668	108.916	214.668	108.914	214.668	108.913	214.668	108.915	214.668	121.692	214.713	106.489	214.668	104.566	214.713	106.568	214.668	104.548	214.713	103.509	214.668	103.799	214.713	106.573
215.125	110.34	215.08	116.933	215.125	110.419	215.08	116.939	215.08	114.046	215.08	114.045	215.08	114.044	215.08	114.045	215.08	127.68	215.125	110.733	215.08	109.535	215.125	110.82	215.08	109.531	215.125	107.497	215.08	108.677	215.125	110.825
215.537	108.183	215.492	114.242	215.537	108.259	215.492	114.249	215.492	111.733	215.492	111.73	215.492	111.733	215.492	111.732	215.492	124.507	215.537	108.645	215.492	107.37	215.537	108.724	215.492	107.35	215.537	105.678	215.492	106.599	215.537	108.729
215.949	108.099	215.904	114.532	215.949	108.18	215.904	114.54	215.904	111.486	215.904	111.485	215.904	111.484	215.904	111.486	215.904	125.466	215.949	108.455	215.904	106.919	215.949	108.547	215.904	106.921	215.949	105.088	215.904	106.023	215.949	108.551
216.361	109.628	216.316	116.013	216.361	109.704	216.316	116.02	216.316	113.44	216.316	113.438	216.316	113.439	216.316	113.44	216.316	126.362	216.361	110.082	216.316	109.049	216.361	110.162	216.316	109.032	216.361	107.075	216.316	108.263	216.361	110.167
216.773	104.451	216.728	110.347	216.773	104.534	216.728	110.354	216.728	106.944	216.728	106.941	216.728	106.939	216.728	106.942	216.728	121.668	216.773	104.734	216.728	102.247	216.773	104.833	216.728	102.267	216.773	101.108	216.728	101.261	216.773	104.838
217.185	110.305	217.141	116.839	217.185	110.381	217.141	116.845	217.141	114.195	217.141	114.194	217.141	114.193	217.141	114.195	217.141	127.28	217.185	110.744	217.141	109.776	217.185	110.826	217.141	109.763	217.185	107.682	217.141	108.974	217.185	110.831
217.597	98.5708	217.553	101.797	217.597	98.6647	217.553	101.804	217.553	97.1695	217.553	97.1629	217.553	97.1695	217.553	97.1635	217.553	114.289	217.597	98.7041	217.553	92.1333	217.597	98.8182	217.553	92.2012	217.597	94.5817	217.553	90.8649	217.597	98.8229
218.009	110.25	217.965	116.829	218.009	110.327	217.965	116.835	217.965	114.105	217.965	114.103	217.965	114.102	217.965	114.104	217.965	127.371	218.009	110.671	217.965	109.657	218.009	110.755	217.965	109.647	218.009	107.542	217.965	108.837	218.009	110.76
218.422	97.8081	218.377	103.718	218.422	97.8768	218.377	103.725	218.377	102.246	218.377	102.235	218.377	102.243	218.377	102.237	218.377	112.581	218.422	98.3022	218.377	98.2457	218.422	98.3736	218.377	98.1911	218.422	95.6597	218.377	97.688	218.422	98.3782
218.834	109.429	218.789	115.963	218.834	109.508	218.789	115.97	218.789	113.136	218.789	113.134	218.789	113.134	218.789	113.135	218.789	126.63	218.834	109.825	218.789	108.653	218.834	109.912	218.789	108.647	218.834	106.607	218.789	107.81	218.834	109.916
219.246	103.304	219.201	110.719	219.246	103.371	219.201	110.725	219.201	108.671	219.201	108.667	219.201	108.668	219.201	108.668	219.201	120.347	219.246	103.856	219.201	104.452	219.246	103.923	219.201	104.417	219.246	101.226	219.201	103.774	219.246	103.927
219.658	107.662	219.613	114.018	219.658	107.742	219.613	114.025	219.613	111.029	219.613	111.027	219.613	111.026	219.613	111.028	219.613	124.876	219.658	108.02	219.613	106.49	219.658	108.111	219.613	106.491	219.658	104.665	219.613	105.609	219.658	108.116
220.07	106.548	220.025	114.071	220.07	106.62	220.025	114.078	220.025	111.786	220.025	111.784	220.025	111.785	220.025	111.785	220.025	124.038	220.07	107.064	220.025	107.488	220.07	107.137	220.025	107.459	220.07	104.284	220.025	106.762	220.07	107.142
220.482	104.445	220.437	110.304	220.482	104.529	220.437	110.312	220.437	106.97	220.437	106.965	220.437	106.967	220.437	106.967	220.437	121.547	220.482	104.726	220.437	102.311	220.482	104.826	220.437	102.327	220.482	101.097	220.437	101.346	220.482	104.831
220.894	108.259	220.849	115.784	220.894	108.332	220.849	115.79	220.849	113.366	220.849	113.363	220.849	113.363	220.849	113.364	220.849	125.934	220.894	108.745	220.849	109.021	220.894	108.822	220.849	108.999	220.894	105.856	220.849	108.267	220.894	108.826
221.306	97.8897	221.261	101.598	221.306	97.9864	221.261	101.606	221.261	96.6343	221.261	96.6178	221.261	96.6269	221.261	96.6189	221.261	114.312	221.306	97.9241	221.261	91.3755	221.306	98.0511	221.261	91.4753	221.306	93.3131	221.261	89.9474	221.306	98.0558
221.719	108.916	221.673	116.433	221.719	108.992	221.673	116.44	221.673	113.914	221.673	113.913	221.673	113.913	221.673	113.914	221.673	126.713	221.719	109.376	221.673	109.538	221.719	109.456	221.673	109.519	221.719	106.396	221.673	108.763	221.719	109.461
222.131	85.2701	222.085	100.633	222.131	85.2646	222.085	100.64	222.085	100.271	222.085	100.274	222.085	100.275	222.085	100.276	222.085	106.933	222.131	87.1474	222.085	96.5041	222.131	87.0748	222.085	96.4137	222.131	88.0767	222.085	96.1022	222.131	87.0792
222.543	108.665	222.497	116.174	222.543	108.742	222.497	116.181	222.497	113.564	222.497	113.561	222.497	113.563	222.497	113.563	222.497	126.573	222.543	109.098	222.497	109.159	222.543	109.181	222.497	109.143	222.543	106.022	222.497	108.364	222.543	109.185
222.955	100.734	222.909	110.242	222.955	100.795	222.909	110.249	222.909	108.44	222.909	108.44	222.909	108.441	222.909	108.442	222.909	119.508	222.955	101.478	222.909	104.279	222.955	101.528	222.909	104.233	222.955	99.4043	222.909	103.646	222.955	101.533
223.367	107.445	223.321	114.947	223.367	107.523	223.321	114.953	223.321	112.232	223.321	112.229	223.321	112.23	223.321	112.229	223.321	125.476	223.367	107.841	223.321	107.794	223.367	107.927	223.321	107.783	223.367	104.643	223.321	106.976	223.367	107.932
223.779	105.58	223.733	114.321	223.779	105.647	223.733	114.327	223.733	112.19	223.733	112.19	223.733	112.189	223.733	112.192	223.733	124.081	223.779	106.191	223.733	107.928	223.779	106.255	223.733	107.895	223.779	103.696	223.733	107.232	223.779	106.26
224.191	104.878	224.145	112.402	224.191	104.96	224.145	112.41	224.145	109.537	224.145	109.535	224.145	109.535	224.145	109.537	224.145	123.109	224.191	105.216	224.145	105.059	224.191	105.31	224.145	105.054	224.191	101.814	224.145	104.21	224.191	105.315
224.603	108.086	224.557	116.568	224.603	108.157	224.557	116.574	224.557	114.283	224.557	114.282	224.557	114.283	224.557	114.282	224.557	126.547	224.603	108.64	224.557	109.974	224.603	108.709	224.557	109.945	224.603	105.964	224.557	109.247	224.603	108.714
225.015	99.6912	224.969	107.56	225.015	99.7789	224.969	107.566	224.969	104.505	224.969	104.498	224.969	104.502	224.969	104.499	224.969	118.527	225.015	99.8743	224.969	100.007	225.015	99.981	224.969	100.009	225.015	95.9533	224.969	99.131	225.015	99.9856
225.428	109.346	225.381	117.741	225.428	109.418	225.381	117.748	225.381	115.358	225.381	115.357	225.381	115.357	225.381	115.358	225.381	127.853	225.428	109.866	225.381	111.018	225.428	109.94	225.381	110.994	225.428	107.079	225.381	110.271	225.428	109.945
225.84	86.6905	225.793	102.176	225.84	86.7346	225.793	102.179	225.793	100.717	225.793	100.71	225.793	100.714	225.793	100.709	225.793	111.189	225.84	87.4172	225.793	96.7582	225.84	87.4328	225.793	96.7014	225.84	86.8178	225.793	96.2193	225.84	87.4372
226.252	109.71	226.205	118.109	226.252	109.784	226.205	118.116	226.205	115.652	226.205	115.65	226.205	115.651	226.205	115.651	226.205	128.32	226.252	110.203	226.205	111.289	226.252	110.279	226.205	111.268	226.252	107.33	226.205	110.526	226.252	110.284
226.664	99.9048	226.617	109.326	226.664	99.9579	226.617	109.331	226.617	107.595	226.617	107.595	226.617	107.592	226.617	107.595	226.617	118.474	226.664	100.706	226.617	103.453	226.664	100.748	226.617	103.408	226.664	98.7784	226.617	102.832	226.664	100.753
227.076	109.234	227.029	117.728	227.076	109.308	227.029	117.735	227.029	115.204	227.029	115.203	227.029	115.202	227.029	115.204	227.029	128.021	227.076	109.704	227.029	110.82	227.076	109.783	227.029	110.803	227.076	106.752	227.029	110.044	227.076	109.787
227.488	105.658	227.441	114.198	227.488	105.723	227.441	114.204	227.441	112.108	227.441	112.106	227.441	112.107	227.441	112.107	227.441	123.914	227.488	106.294	227.441	107.854	227.488	106.355	227.441	107.82	227.488	103.872	227.441	107.165	227.488	106.36
227.9	107.838	227.853	116.553	227.9	107.913	227.853	116.559	227.853	113.967	227.853	113.965	227.853	113.964	227.853	113.966	227.853	126.921	227.9	108.281	227.853	109.566	227.9	108.362	227.853	109.551	227.9	105.245	227.853	108.776	227.9	108.367
228.312	108.727	228.265	117.064	228.312	108.798	228.265	117.071	228.265	114.81	228.265	114.809	228.265	114.81	228.265	114.81	228.265	127.011	228.312	109.305	228.265	110.506	228.312	109.372	228.265	110.476	228.312	106.692	228.265	109.785	228.312	109.377
228.725	105.196	228.677	114.417	228.725	105.276	228.677	114.424	228.677	111.78	228.677	111.777	228.677	111.78	228.677	111.779	228.677	124.846	228.725	105.606	228.677	107.373	228.725	105.691	228.677	107.357	228.725	102.478	228.677	106.574	228.725	105.696
229.137	110.515	229.089	118.805	229.137	110.586	229.089	118.812	229.089	116.455	229.089	116.454	229.089	116.454	229.089	116.455	229.089	128.884	229.137	111.059	229.089	112.12	229.137	111.13	229.089	112.094	229.137	108.337	229.089	111.379	229.137	111.134
229.549	100.876	229.501	111.308	229.549	100.954	229.501	111.314	229.501	108.73	229.501	108.729	229.501	108.729	229.501	108.729	229.501	121.662	229.549	101.288	229.501	104.36	229.549	101.37	229.501	104.343	229.549	98.2385	229.501	103.579	229.549	101.374
229.961	111.442	229.913	119.757	229.961	111.514	229.913	119.764	229.913	117.338	229.913	117.337	229.913	117.336	229.913	117.338	229.913	129.926	229.961	111.962	229.913	112.981	229.961	112.036	229.913	112.959	229.961	109.165	229.913	112.226	229.961	112.041
230.373	99.2354	230.326	109.625	230.373	99.3007	230.326	109.632	230.326	107.478	230.326	107.479	230.326	107.48	230.326	107.48	230.326	119.393	230.373	99.9198	230.326	103.248	230.373	99.9736	230.326	103.212	230.373	97.7262	230.326	102.555	230.373	99.9782
230.785	111.658	230.738	120.052	230.785	111.731	230.738	120.059	230.738	117.578	230.738	117.576	230.738	117.576	230.738	117.577	230.738	130.292	230.785	112.159	230.738	113.204	230.785	112.235	230.738	113.184	230.785	109.3	230.738	112.438	230.785	112.239
231.197	104.283	231.15	112.621	231.197	104.349	231.15	112.628	231.15	110.545	231.15	110.543	231.15	110.545	231.15	110.543	231.15	122.3	231.197	104.934	231.15	106.305	231.197	104.993	231.15	106.269	231.197	102.565	231.15	105.619	231.197	104.998
231.609	111.2	231.562	119.733	231.609	111.275	231.562	119.739	231.562	117.21	231.562	117.207	231.562	117.209	231.562	117.209	231.562	130.034	231.609	111.683	231.562	112.822	231.609	111.761	231.562	112.803	231.609	108.77	231.562	112.045	231.609	111.766
232.021	108.18	231.974	116.07	232.021	108.249	231.974	116.077	231.974	113.844	231.974	113.844	231.974	113.843	231.974	113.845	231.974	125.973	232.021	108.768	231.974	109.55	232.021	108.835	231.974	109.52	232.021	106.188	231.974	108.834	232.021	108.84
232.434	110.022	232.386	118.781	232.434	110.097	232.386	118.788	232.386	116.211	232.386	116.21	232.386	116.209	232.386	116.211	232.386	129.137	232.434	110.49	232.386	111.809	232.434	110.568	232.386	111.793	232.434	107.525	232.386	111.023	232.434	110.573
232.846	110.677	232.798	118.522	232.846	110.747	232.798	118.529	232.798	116.192	232.798	116.19	232.798	116.191	232.798	116.192	232.798	128.578	232.846	111.228	232.798	111.862	232.846	111.299	232.798	111.836	232.846	108.53	232.798	111.125	232.846	111.303
233.258	108.018	233.21	117.137	233.258	108.094	233.21	117.145	233.21	114.529	233.21	114.527	233.21	114.528	233.21	114.529	233.21	127.537	233.258	108.47	233.21	110.12	233.258	108.551	233.21	110.104	233.258	105.465	233.21	109.326	233.258	108.556
233.67	112.229	233.622	120.124	233.67	112.301	233.622	120.13	233.622	117.721	233.622	117.719	233.622	117.719	233.622	117.72	233.622	130.277	233.67	112.757	233.622	113.366	233.67	112.83	233.622	113.343	233.67	109.982	233.622	112.615	233.67	112.835
234.082	105.328	234.034	114.893	234.082	105.402	234.034	114.899	234.034	112.293	234.034	112.289	234.034	112.29	234.034	112.29	234.034	125.278	234.082	105.787	234.034	107.892	234.082	105.866	234.034	107.877	234.082	102.833	234.034	107.1	234.082	105.87
234.494	113.07	234.446	121.047	234.494	113.143	234.446	121.054	234.446	118.588	234.446	118.586	234.446	118.586	234.446	118.588	234.446	131.273	234.494	113.581	234.446	114.216	234.494	113.655	234.446	114.195	234.494	110.747	234.446	113.453	234.494	113.66
234.906	103.927	234.858	113.118	234.906	103.999	234.858	113.125	234.858	110.673	234.858	110.671	234.858	110.673	234.858	110.672	234.858	123.297	234.906	104.472	234.858	106.332	234.906	104.542	234.858	106.309	234.906	101.803	234.858	105.575	234.906	104.547
235.318	113.304	235.27	121.389	235.318	113.378	235.27	121.395	235.27	118.882	235.27	118.881	235.27	118.881	235.27	118.882	235.27	131.674	235.318	113.8	235.27	114.496	235.318	113.876	235.27	114.476	235.318	110.918	235.27	113.722	235.318	113.881
235.73	106.214	235.682	114.069	235.73	106.282	235.682	114.076	235.682	111.786	235.682	111.784	235.682	111.784	235.682	111.785	235.682	124.035	235.73	106.797	235.682	107.484	235.73	106.863	235.682	107.457	235.73	104.218	235.682	106.758	235.73	106.868
236.143	112.962	236.094	121.183	236.143	113.036	236.094	121.19	236.094	118.634	236.094	118.632	236.094	118.633	236.094	118.633	236.094	131.525	236.143	113.443	236.094	114.234	236.143	113.521	236.094	114.217	236.143	110.515	236.094	113.452	236.143	113.525
236.555	109.254	236.506	116.654	236.555	109.325	236.506	116.661	236.506	114.34	236.506	114.339	236.506	114.339	236.506	114.34	236.506	126.675	236.555	109.813	236.506	110.02	236.555	109.883	236.506	109.993	236.555	107.141	236.506	109.287	236.555	109.887
236.967	112.021	236.918	120.423	236.967	112.097	236.918	120.43	236.918	117.83	236.918	117.829	236.918	117.829	236.918	117.83	236.918	130.816	236.967	112.489	236.918	113.417	236.967	112.569	236.918	113.401	236.967	109.517	236.918	112.626	236.967	112.573
237.379	111.543	237.33	118.939	237.379	111.614	237.33	118.945	237.33	116.555	237.33	116.554	237.33	116.553	237.33	116.554	237.33	129.062	237.379	112.077	237.33	112.208	237.379	112.149	237.33	112.185	237.379	109.322	237.33	111.46	237.379	112.154
237.791	110.43	237.742	119.064	237.791	110.507	237.742	119.071	237.742	116.429	237.742	116.427	237.742	116.428	237.742	116.428	237.742	129.507	237.791	110.884	237.742	112.005	237.791	110.965	237.742	111.99	237.791	107.872	237.742	111.203	237.791	110.97
238.203	113.069	238.154	120.56	238.203	113.141	238.154	120.566	238.154	118.116	238.154	118.114	238.154	118.114	238.154	118.115	238.154	130.765	238.203	113.585	238.154	113.748	238.203	113.659	238.154	113.727	238.203	110.767	238.154	112.988	238.203	113.664
238.615	108.262	238.566	117.123	238.615	108.338	238.566	117.129	238.566	114.456	238.566	114.454	238.566	114.455	238.566	114.455	238.566	127.596	238.615	108.71	238.566	110.026	238.615	108.791	238.566	110.013	238.615	105.687	238.566	109.219	238.615	108.796
239.027	113.954	238.978	121.558	239.027	114.027	238.978	121.564	238.978	119.065	238.978	119.063	238.978	119.063	238.978	119.064	238.978	131.83	239.027	114.454	238.978	114.681	239.027	114.53	238.978	114.661	239.027	111.587	238.978	113.91	239.027	114.535
239.44	106.384	239.39	115.036	239.44	106.458	239.39	115.042	239.39	112.407	239.39	112.406	239.39	112.405	239.39	112.407	239.39	125.454	239.44	106.862	239.39	107.997	239.44	106.938	239.39	107.983	239.44	103.949	239.39	107.199	239.44	106.943
239.852	114.275	239.802	122.001	239.852	114.35	239.802	122.008	239.802	119.465	239.802	119.463	239.802	119.463	239.802	119.464	239.802	132.33	239.852	114.763	239.802	115.067	239.852	114.84	239.802	115.049	239.852	111.851	239.802	114.287	239.852	114.845
240.264	106.899	240.214	114.47	240.264	106.969	240.214	114.476	240.214	112	240.214	111.998	240.214	111.998	240.214	111.998	240.214	124.686	240.264	107.427	240.214	107.642	240.264	107.498	240.214	107.623	240.264	104.679	240.214	106.878	240.264	107.503
240.676	114.063	240.626	121.923	240.676	114.138	240.626	121.93	240.626	119.344	240.626	119.343	240.626	119.342	240.626	119.344	240.626	132.305	240.676	114.539	240.626	114.933	240.676	114.617	240.626	114.916	240.676	111.585	240.626	114.143	240.676	114.622
241.088	109.238	241.038	116.189	241.088	109.31	241.038	116.196	241.038	113.791	241.038	113.79	241.038	113.789	241.038	113.791	241.038	126.314	241.088	109.775	241.038	109.448	241.088	109.847	241.038	109.425	241.088	107.03	241.038	108.698	241.088	109.852
241.5	113.306	241.45	121.318	241.5	113.381	241.45	121.324	241.45	118.695	241.45	118.693	241.45	118.693	241.45	118.694	241.45	131.753	241.5	113.768	241.45	114.269	241.5	113.848	241.45	114.255	241.5	110.771	241.45	113.471	241.5	113.853
241.912	111.475	241.862	118.412	241.912	111.547	241.862	118.418	241.862	115.984	241.862	115.983	241.862	115.982	241.862	115.983	241.862	128.588	241.912	111.996	241.862	111.626	241.912	112.069	241.862	111.604	241.912	109.198	241.862	110.869	241.912	112.074
242.324	111.959	242.274	120.144	242.324	112.035	242.274	120.15	242.274	117.474	242.274	117.471	242.274	117.472	242.274	117.472	242.274	130.638	242.324	112.405	242.274	113.033	242.324	112.486	242.274	113.021	242.324	109.361	242.274	112.224	242.324	112.491
242.736	113.09	242.686	120.161	242.736	113.164	242.686	120.168	242.686	117.684	242.686	117.683	242.686	117.683	242.686	117.684	242.686	130.407	242.736	113.596	242.686	113.308	242.736	113.671	242.686	113.287	242.736	110.744	242.686	112.541	242.736	113.676
243.149	109.996	243.098	118.348	243.149	110.074	243.098	118.355	243.098	115.623	243.098	115.621	243.098	115.622	243.098	115.623	243.098	128.902	243.149	110.43	243.098	111.168	243.149	110.513	243.098	111.157	243.149	107.342	243.098	110.347	243.149	110.517
243.561	114.093	243.511	121.311	243.561	114.166	243.511	121.317	243.511	118.788	243.511	118.786	243.511	118.786	243.511	118.787	243.511	131.62	243.561	114.585	243.511	114.395	243.561	114.661	243.511	114.376	243.561	111.687	243.511	113.617	243.561	114.666
243.973	107.737	243.923	116.019	243.973	107.814	243.923	116.026	243.923	113.258	243.923	113.256	243.923	113.256	243.923	113.257	243.923	126.61	243.973	108.168	243.923	108.797	243.973	108.251	243.923	108.788	243.973	105.088	243.923	107.969	243.973	108.256
244.385	114.543	244.335	121.902	244.385	114.617	244.335	121.908	244.335	119.335	244.335	119.334	244.335	119.333	244.335	119.335	244.335	132.268	244.385	115.023	244.335	114.927	244.385	115.101	244.335	114.91	244.385	112.083	244.335	114.141	244.385	115.106
244.797	106.741	244.747	114.139	244.797	106.815	244.747	114.145	244.747	111.46	244.747	111.456	244.747	111.457	244.747	111.457	244.747	124.625	244.797	107.212	244.747	107.035	244.797	107.29	244.747	107.023	244.797	104.279	244.747	106.226	244.797	107.294
245.209	114.468	245.159	121.962	245.209	114.544	245.159	121.968	245.159	119.353	245.159	119.351	245.159	119.351	245.159	119.352	245.159	132.383	245.209	114.935	245.159	114.93	245.209	115.015	245.159	114.915	245.209	111.954	245.159	114.135	245.209	115.02
245.621	108.239	245.571	114.692	245.621	108.312	245.571	114.698	245.571	112.186	245.571	112.184	245.571	112.185	245.571	112.184	245.571	124.955	245.621	108.747	245.571	107.816	245.621	108.821	245.571	107.797	245.621	105.923	245.571	107.045	245.621	108.826
246.033	113.862	245.983	121.494	246.033	113.938	245.983	121.501	245.983	118.838	245.983	118.837	245.983	118.837	245.983	118.838	245.983	131.973	246.033	114.316	245.983	114.401	246.033	114.397	245.983	114.387	246.033	111.289	245.983	113.595	246.033	114.402
246.446	110.492	246.395	116.884	246.446	110.565	246.395	116.89	246.395	114.415	246.395	114.413	246.395	114.412	246.395	114.414	246.395	127.106	246.446	111	246.395	110.047	246.446	111.075	246.395	110.027	246.446	108.164	246.395	109.282	246.446	111.08
246.858	112.679	246.807	120.457	246.858	112.755	246.807	120.464	246.807	117.748	246.807	117.746	246.807	117.746	246.807	117.747	246.807	131.003	246.858	113.117	246.807	113.292	246.858	113.199	246.807	113.281	246.858	110.038	246.807	112.474	246.858	113.204
247.27	112.309	247.219	118.907	247.27	112.382	247.219	118.913	247.219	116.403	247.219	116.402	247.219	116.401	247.219	116.403	247.219	129.182	247.27	112.805	247.219	112.02	247.27	112.881	247.219	112.001	247.27	109.925	247.219	111.247	247.27	112.886
247.682	110.832	247.631	118.752	247.682	110.909	247.631	118.759	247.631	115.973	247.631	115.972	247.631	115.971	247.631	115.973	247.631	129.378	247.682	111.251	247.631	111.496	247.682	111.335	247.631	111.487	247.682	108.107	247.631	110.662	247.682	111.34
248.094	113.506	248.043	120.308	248.094	113.58	248.043	120.315	248.043	117.76	248.043	117.758	248.043	117.758	248.043	117.759	248.043	130.647	248.094	113.99	248.043	113.36	248.094	114.067	248.043	113.342	248.094	111.065	248.043	112.577	248.094	114.072
248.506	108.324	248.455	116.266	248.506	108.403	248.455	116.272	248.455	113.396	248.455	113.394	248.455	113.394	248.455	113.394	248.455	126.995	248.506	108.721	248.455	108.891	248.506	108.808	248.455	108.887	248.506	105.512	248.455	108.038	248.506	108.812
248.918	114.122	248.867	121.094	248.918	114.197	248.867	121.101	248.867	118.5	248.867	118.499	248.867	118.499	248.867	118.5	248.867	131.494	248.918	114.593	248.867	114.084	248.918	114.672	248.867	114.068	248.918	111.626	248.867	113.292	248.918	114.677
249.33	105.936	249.279	113.218	249.33	106.012	249.279	113.225	249.279	110.288	249.279	110.283	249.279	110.284	249.279	110.284	249.279	124.008	249.33	106.336	249.279	105.775	249.33	106.422	249.279	105.774	249.33	103.169	249.279	104.908	249.33	106.426
249.742	114.195	249.691	121.312	249.742	114.27	249.691	121.319	249.691	118.672	249.691	118.671	249.691	118.67	249.691	118.672	249.691	131.772	249.742	114.654	249.691	114.239	249.742	114.734	249.691	114.225	249.742	111.643	249.691	113.437	249.742	114.739
250.155	106.117	250.103	111.906	250.155	106.192	250.103	111.913	250.103	109.201	250.103	109.199	250.103	109.2	250.103	109.2	250.103	122.415	250.155	106.585	250.103	104.783	250.155	106.663	250.103	104.77	250.155	103.641	250.103	103.971	250.155	106.668
250.567	113.724	250.515	120.974	250.567	113.802	250.515	120.98	250.515	118.282	250.515	118.281	250.515	118.281	250.515	118.282	250.515	131.498	250.567	114.17	250.515	113.833	250.567	114.252	250.515	113.82	250.567	111.111	250.515	113.019	250.567	114.256
250.979	108.465	250.927	114.093	250.979	108.538	250.927	114.099	250.927	111.59	250.927	111.587	250.927	111.588	250.927	111.588	250.927	124.353	250.979	108.958	250.927	107.222	250.979	109.034	250.927	107.204	250.979	106.087	250.927	106.451	250.979	109.039
251.391	112.662	251.339	120.037	251.391	112.739	251.339	120.043	251.339	117.284	251.339	117.283	251.339	117.282	251.339	117.283	251.339	130.638	251.391	113.09	251.339	112.813	251.391	113.173	251.339	112.803	251.391	109.972	251.339	111.985	251.391	113.178
251.803	110.67	251.751	116.704	251.803	110.744	251.751	116.71	251.751	114.192	251.751	114.19	251.751	114.19	251.751	114.191	251.751	126.982	251.803	111.158	251.751	109.812	251.803	111.235	251.751	109.793	251.803	108.258	251.751	109.037	251.803	111.24
252.215	110.89	252.163	118.384	252.215	110.969	252.163	118.391	252.163	115.547	252.163	115.546	252.163	115.546	252.163	115.546	252.163	129.087	252.215	111.295	252.163	111.047	252.215	111.381	252.163	111.041	252.215	108.098	252.163	110.201	252.215	111.386
252.627	112.175	252.575	118.533	252.627	112.249	252.575	118.539	252.575	115.971	252.575	115.969	252.575	115.969	252.575	115.97	252.575	128.882	252.627	112.651	252.575	111.569	252.627	112.73	252.575	111.553	252.627	109.705	252.575	110.784	252.627	112.735
253.039	108.21	252.987	115.766	253.039	108.29	252.987	115.773	252.987	112.793	252.987	112.792	252.987	112.791	252.987	112.792	252.987	126.624	253.039	108.579	252.987	108.247	253.039	108.668	252.987	108.247	253.039	105.26	252.987	107.369	253.039	108.673
253.451	113.009	253.399	119.59	253.451	113.085	253.399	119.597	253.399	116.975	253.399	116.974	253.399	116.973	253.399	116.975	253.399	130.012	253.451	113.473	253.399	112.554	253.451	113.553	253.399	112.539	253.451	110.48	253.399	111.757	253.451	113.558
253.864	104.558	253.811	111.71	253.864	104.641	253.811	111.716	253.811	108.482	253.811	108.481	253.811	108.481	253.811	108.481	253.811	122.836	253.864	104.879	253.811	103.858	253.864	104.973	253.811	103.867	253.864	101.41	253.811	102.919	253.864	104.978
254.276	113.244	254.223	119.984	254.276	113.321	254.223	119.991	254.223	117.314	254.223	117.313	254.223	117.313	254.223	117.314	254.223	130.478	254.276	113.694	254.223	112.873	254.276	113.776	254.223	112.86	254.276	110.652	254.223	112.064	254.276	113.78
254.688	102.39	254.635	106.987	254.688	102.47	254.635	106.993	254.635	103.737	254.635	103.735	254.635	103.737	254.635	103.735	254.635	118.145	254.688	102.772	254.635	99.1783	254.688	102.858	254.635	99.1858	254.688	99.5768	254.635	98.2561	254.688	102.863
255.1	112.891	255.047	119.75	255.1	112.968	255.047	119.757	255.047	117.019	255.047	117.018	255.047	117.017	255.047	117.018	255.047	130.323	255.1	113.325	255.047	112.556	255.1	113.408	255.047	112.546	255.1	110.229	255.047	111.733	255.1	113.412
255.512	105.061	255.459	109.497	255.512	105.133	255.459	109.504	255.459	107.084	255.459	107.08	255.459	107.081	255.459	107.082	255.459	119.647	255.512	105.546	255.459	102.773	255.512	105.622	255.459	102.751	255.512	102.674	255.459	102.028	255.512	105.627
255.924	111.908	255.871	118.862	255.924	111.986	255.871	118.868	255.871	116.055	255.871	116.054	255.871	116.053	255.871	116.054	255.871	129.528	255.924	112.323	255.871	111.565	255.924	112.408	255.871	111.557	255.924	109.158	255.871	110.725	255.924	112.413
256.336	108.127	256.283	113.659	256.336	108.201	256.283	113.666	256.283	111.228	256.283	111.226	256.283	111.226	256.283	111.227	256.283	123.822	256.336	108.616	256.283	106.884	256.336	108.693	256.283	106.861	256.336	105.729	256.283	106.128	256.336	108.698
256.748	110.159	256.695	117.185	256.748	110.239	256.695	117.191	256.695	114.271	256.695	114.27	256.695	114.27	256.695	114.271	256.695	127.981	256.748	110.547	256.695	109.744	256.748	110.635	256.695	109.74	256.748	107.285	256.695	108.88	256.748	110.64
257.161	110.144	257.108	116.206	257.161	110.219	257.108	116.213	257.108	113.684	257.108	113.682	257.108	113.682	257.108	113.682	257.108	126.498	257.161	110.618	257.108	109.301	257.161	110.696	257.108	109.283	257.161	107.672	257.108	108.525	257.161	110.701
257.573	107.314	257.52	114.371	257.573	107.397	257.52	114.378	257.52	111.273	257.52	111.273	257.52	111.272	257.52	111.273	257.52	125.381	257.573	107.655	257.52	106.679	257.573	107.748	257.52	106.683	257.573	104.225	257.52	105.772	257.573	107.753
257.985	111.269	257.932	117.602	257.985	111.344	257.932	117.609	257.932	114.998	257.932	114.996	257.932	114.996	257.932	114.997	257.932	128.003	257.985	111.727	257.932	110.584	257.985	111.807	257.932	110.569	257.985	108.719	257.932	109.79	257.985	111.812
258.397	102.515	258.344	109.354	258.397	102.603	258.344	109.361	258.344	105.788	258.344	105.787	258.344	105.784	258.344	105.788	258.344	120.87	258.397	102.744	258.344	101.013	258.397	102.849	258.344	101.039	258.397	98.9042	258.344	99.987	258.397	102.854
258.809	111.666	258.756	118.148	258.809	111.743	258.756	118.155	258.756	115.466	258.756	115.465	258.756	115.464	258.756	115.466	258.756	128.648	258.809	112.107	258.756	111.025	258.809	112.189	258.756	111.012	258.809	109.038	258.756	110.214	258.809	112.194
259.221	95.0429	259.168	95.6534	259.221	95.1328	259.168	95.6621	259.168	86.8927	259.168	86.8771	259.168	86.8647	259.168	86.878	259.168	110.369	259.221	95.0993	259.168	79.5478	259.221	95.2179	259.168	79.9907	259.221	90.9362	259.168	76.2389	259.221	95.2224
259.633	111.387	259.58	117.942	259.633	111.464	259.58	117.948	259.58	115.176	259.58	115.174	259.58	115.174	259.58	115.174	259.58	128.55	259.633	111.808	259.58	110.705	259.633	111.892	259.58	110.696	259.633	108.669	259.58	109.874	259.633	111.896
260.045	100.187	259.992	105.154	260.045	100.254	259.992	105.161	259.992	103.661	259.992	103.66	259.992	103.661	259.992	103.661	259.992	113.916	260.045	100.759	259.992	99.6195	260.045	100.824	259.992	99.5646	260.045	98.2319	259.992	99.0472	260.045	100.829
260.457	110.4	260.404	116.968	260.457	110.479	260.404	116.975	260.404	114.097	260.404	114.095	260.404	114.095	260.404	114.096	260.404	127.706	260.457	110.797	260.404	109.588	260.457	110.884	260.404	109.583	260.457	107.571	260.404	108.733	260.457	110.889
260.87	105.271	260.816	111.639	260.87	105.343	260.816	111.646	260.816	109.499	260.816	109.497	260.816	109.498	260.816	109.499	260.816	121.401	260.87	105.804	260.816	105.244	260.87	105.875	260.816	105.211	260.87	103.073	260.816	104.547	260.87	105.88
261.282	108.54	261.228	115.049	261.282	108.623	261.228	115.056	261.228	112.02	261.228	112.019	261.228	112.019	261.228	112.02	261.228	125.973	261.282	108.903	261.228	107.454	261.282	108.994	261.228	107.455	261.282	105.548	261.228	106.563	261.282	108.999
261.694	107.968	261.64	114.64	261.694	108.041	261.64	114.647	261.64	112.271	261.64	112.269	261.64	112.269	261.64	112.27	261.64	124.73	261.694	108.462	261.64	107.938	261.694	108.538	261.64	107.915	261.694	105.594	261.64	107.194	261.694	108.543
262.106	105.367	262.052	111.687	262.106	105.451	262.052	111.693	262.052	108.37	262.052	108.368	262.052	108.366	262.052	108.368	262.052	122.949	262.106	105.665	262.052	103.689	262.106	105.763	262.052	103.705	262.106	102.075	262.052	102.728	262.106	105.768
262.518	109.349	262.464	116.129	262.518	109.425	262.464	116.136	262.464	113.621	262.464	113.619	262.464	113.619	262.464	113.621	262.464	126.402	262.518	109.816	262.464	109.242	262.518	109.895	262.464	109.223	262.518	106.846	262.464	108.469	262.518	109.9
262.93	99.3652	262.876	105.302	262.93	99.4626	262.876	105.306	262.876	101.325	262.876	101.327	262.876	101.325	262.876	101.325	262.876	117.376	262.93	99.4981	262.876	96.3627	262.93	99.6143	262.876	96.3972	262.93	95.2543	262.876	95.2549	262.93	99.619
263.342	109.811	263.288	116.616	263.342	109.887	263.288	116.623	263.288	113.996	263.288	113.993	263.288	113.994	263.288	113.994	263.288	127.035	263.342	110.251	263.288	109.579	263.342	110.333	263.288	109.564	263.342	107.19	263.288	108.781	263.342	110.338
263.754	83.6195	263.7	100.497	263.754	83.6208	263.7	100.504	263.7	99.8195	263.7	99.8207	263.7	99.8194	263.7	99.8231	263.7	109.201	263.754	85.6303	263.7	95.9143	263.754	85.5658	263.7	95.8252	263.754	86.879	263.7	95.5082	263.754	85.5709
264.166	109.47	264.112	116.235	264.166	109.548	264.112	116.242	264.112	113.497	264.112	113.495	264.112	113.495	264.112	113.496	264.112	126.799	264.166	109.883	264.112	109.041	264.166	109.968	264.112	109.031	264.166	106.722	264.112	108.218	264.166	109.973
264.579	99.713	264.524	109.051	264.579	99.7733	264.524	109.059	264.524	107.403	264.524	107.402	264.524	107.404	264.524	107.404	264.524	118.125	264.579	100.498	264.524	103.267	264.579	100.545	264.524	103.215	264.579	98.5265	264.524	102.66	264.579	100.549
264.991	108.275	264.936	114.909	264.991	108.355	264.936	114.916	264.936	112.018	264.936	112.015	264.936	112.016	264.936	112.016	264.936	125.658	264.991	108.651	264.936	107.511	264.991	108.74	264.936	107.507	264.991	105.358	264.936	106.653	264.991	108.744
265.403	104.85	265.348	113.249	265.403	104.917	265.348	113.257	265.348	111.182	265.348	111.18	265.348	111.181	265.348	111.182	265.348	122.935	265.403	105.46	265.348	106.93	265.403	105.524	265.348	106.895	265.403	102.96	265.348	106.246	265.403	105.529
265.815	105.962	265.76	112.274	265.815	106.044	265.76	112.282	265.76	109.12	265.76	109.116	265.76	109.116	265.76	109.117	265.76	123.325	265.815	106.279	265.76	104.519	265.815	106.376	265.76	104.528	265.815	102.775	265.76	103.598	265.815	106.38
266.227	107.385	266.172	115.491	266.227	107.457	266.172	115.497	266.172	113.219	266.172	113.22	266.172	113.219	266.172	113.221	266.172	125.454	266.227	107.93	266.172	108.91	266.227	108.001	266.172	108.881	266.227	105.213	266.172	108.186	266.227	108.005
266.639	101.768	266.584	107.108	266.639	101.86	266.584	107.115	266.584	103.239	266.584	103.238	266.584	103.237	266.584	103.239	266.584	118.886	266.639	101.972	266.584	98.3646	266.639	102.081	266.584	98.4028	266.639	98.0189	266.584	97.2539	266.639	102.086
267.051	108.605	266.996	116.587	267.051	108.678	266.996	116.594	266.996	114.186	266.996	114.184	266.996	114.184	266.996	114.186	266.996	126.727	267.051	109.107	266.996	109.836	267.051	109.182	266.996	109.813	267.051	106.253	266.996	109.085	267.051	109.187
267.463	93.6212	267.408	95.9881	267.463	93.721	267.408	95.9943	267.408	93.554	267.408	93.5632	267.408	93.5587	267.408	93.5654	267.408	109.232	267.463	93.7433	267.408	89.4251	267.463	93.8641	267.408	89.3176	267.463	89.7743	267.408	89.0954	267.463	93.8689
267.876	108.875	267.82	116.806	267.876	108.951	267.82	116.813	267.82	114.299	267.82	114.297	267.82	114.297	267.82	114.298	267.82	127.083	267.876	109.343	267.82	109.917	267.876	109.422	267.82	109.898	267.876	106.375	267.82	109.144	267.876	109.427
268.288	97.4837	268.232	107.028	268.288	97.535	268.232	107.035	268.232	105.608	268.232	105.609	268.232	105.608	268.232	105.611	268.232	115.856	268.288	98.4079	268.232	101.518	268.288	98.4434	268.232	101.459	268.288	96.7686	268.232	100.955	268.288	98.4481
268.7	108.263	268.644	116.183	268.7	108.339	268.644	116.189	268.644	113.569	268.644	113.567	268.644	113.567	268.644	113.568	268.644	126.591	268.7	108.693	268.644	109.155	268.7	108.776	268.644	109.141	268.7	105.604	268.644	108.359	268.7	108.781
269.112	103.756	269.056	112.629	269.112	103.821	269.056	112.636	269.056	110.679	269.056	110.679	269.056	110.68	269.056	110.681	269.056	122.178	269.112	104.453	269.056	106.454	269.112	104.51	269.056	106.412	269.112	102.189	269.056	105.792	269.112	104.515
269.524	106.617	269.468	114.566	269.524	106.696	269.468	114.572	269.468	111.821	269.468	111.819	269.468	111.819	269.468	111.82	269.468	125.132	269.524	106.999	269.468	107.369	269.524	107.087	269.468	107.36	269.524	103.745	269.468	106.545	269.524	107.091
269.936	107.036	269.881	115.629	269.936	107.104	269.881	115.636	269.881	113.459	269.881	113.458	269.881	113.458	269.881	113.459	269.881	125.48	269.936	107.643	269.881	109.17	269.936	107.708	269.881	109.138	269.936	105.113	269.881	108.465	269.936	107.713
270.348	103.387	270.293	111.454	270.348	103.47	270.293	111.461	270.293	108.497	270.293	108.495	270.293	108.494	270.293	108.496	270.293	122.265	270.348	103.678	270.293	103.988	270.348	103.777	270.293	103.988	270.348	100.107	270.293	103.119	270.348	103.781
270.76	108.854	270.705	117.345	270.76	108.924	270.705	117.352	270.705	115.046	270.705	115.045	270.705	115.044	270.705	115.046	270.705	127.365	270.76	109.412	270.705	110.72	270.76	109.482	270.705	110.693	270.76	106.731	270.705	109.989	270.76	109.486
271.172	96.2631	271.117	105.106	271.172	96.3584	271.117	105.111	271.117	101.744	271.117	101.738	271.117	101.737	271.117	101.736	271.117	116.423	271.172	96.2287	271.117	97.1791	271.172	96.3584	271.117	97.196	271.172	91.3912	271.117	96.2461	271.172	96.3629
271.585	109.703	271.529	118.188	271.585	109.776	271.529	118.195	271.529	115.796	271.529	115.795	271.529	115.795	271.529	115.796	271.529	128.327	271.585	110.228	271.529	111.444	271.585	110.302	271.529	111.419	271.585	107.441	271.529	110.694	271.585	110.307
271.997	88.7442	271.941	100.477	271.997	88.7646	271.941	100.483	271.941	99.9061	271.941	99.9073	271.941	99.9107	271.941	99.9092	271.941	107.471	271.997	90.3931	271.941	96.1125	271.997	90.3608	271.941	96.0263	271.997	90.4527	271.941	95.6876	271.997	90.3657
272.409	109.763	272.353	118.314	272.409	109.837	272.353	118.321	272.353	115.845	272.353	115.844	272.353	115.844	272.353	115.845	272.353	128.55	272.409	110.259	272.353	111.47	272.409	110.335	272.353	111.449	272.409	107.381	272.353	110.705	272.409	110.34
272.821	101.653	272.765	109.918	272.821	101.713	272.765	109.924	272.765	108.175	272.765	108.174	272.765	108.174	272.765	108.174	272.765	119.136	272.821	102.418	272.765	104.01	272.821	102.467	272.765	103.963	272.821	100.346	272.765	103.385	272.821	102.471
273.233	109.029	273.177	117.735	273.233	109.104	273.177	117.741	273.177	115.193	273.177	115.192	273.177	115.19	273.177	115.192	273.177	128.059	273.233	109.498	273.177	110.796	273.233	109.577	273.177	110.779	273.233	106.531	273.177	110.015	273.233	109.581
273.645	106.378	273.589	114.493	273.645	106.446	273.589	114.501	273.589	112.4	273.589	112.399	273.589	112.4	273.589	112.401	273.589	124.24	273.645	107.015	273.589	108.134	273.645	107.078	273.589	108.097	273.645	104.569	273.589	107.444	273.645	107.083
274.057	107.356	274.001	116.366	274.057	107.433	274.001	116.373	274.001	113.748	274.001	113.747	274.001	113.747	274.001	113.748	274.001	126.781	274.057	107.791	274.001	109.333	274.057	107.874	274.001	109.317	274.057	104.718	274.001	108.536	274.057	107.878
274.469	109.016	274.413	117.143	274.469	109.086	274.413	117.15	274.413	114.891	274.413	114.89	274.413	114.89	274.413	114.891	274.413	127.109	274.469	109.598	274.413	110.577	274.469	109.666	274.413	110.547	274.469	106.982	274.413	109.856	274.469	109.671
274.882	104.31	274.825	113.983	274.882	104.388	274.825	113.989	274.825	111.285	274.825	111.283	274.825	111.282	274.825	111.283	274.825	124.489	274.882	104.696	274.825	106.852	274.882	104.782	274.825	106.84	274.882	101.484	274.825	106.038	274.882	104.787
275.294	110.537	275.237	118.724	275.294	110.608	275.237	118.731	275.237	116.374	275.237	116.372	275.237	116.372	275.237	116.374	275.237	128.818	275.294	111.085	275.237	112.03	275.294	111.156	275.237	112.004	275.294	108.365	275.237	111.288	275.294	111.161
275.706	99.0429	275.649	110.367	275.706	99.1212	275.649	110.373	275.649	107.68	275.649	107.678	275.649	107.678	275.649	107.678	275.649	120.857	275.706	99.4021	275.649	103.276	275.706	99.4882	275.649	103.265	275.706	96.2199	275.649	102.471	275.706	99.4928
276.118	111.272	276.061	119.551	276.118	111.343	276.061	119.558	276.061	117.129	276.061	117.127	276.061	117.127	276.061	117.129	276.061	129.739	276.118	111.795	276.061	112.763	276.118	111.869	276.061	112.741	276.118	108.997	276.061	112.006	276.118	111.874
276.53	97.6076	276.473	108.01	276.53	97.6665	276.473	108.017	276.473	105.901	276.473	105.897	276.473	105.901	276.473	105.898	276.473	117.747	276.53	98.3741	276.473	101.685	276.53	98.4193	276.473	101.65	276.53	96.4284	276.473	101.001	276.53	98.424
276.942	111.337	276.885	119.747	276.942	111.41	276.885	119.754	276.885	117.263	276.885	117.262	276.885	117.262	276.885	117.263	276.885	130.011	276.942	111.84	276.885	112.879	276.942	111.916	276.885	112.859	276.942	108.976	276.885	112.11	276.942	111.921
277.354	103.711	277.297	111.476	277.354	103.776	277.297	111.483	277.297	109.468	277.297	109.467	277.297	109.468	277.297	109.468	277.297	121.059	277.354	104.389	277.297	105.242	277.354	104.446	277.297	105.203	277.354	102.076	277.297	104.568	277.354	104.451
277.766	110.751	277.709	119.346	277.766	110.825	277.709	119.353	277.709	116.806	277.709	116.804	277.709	116.804	277.709	116.805	277.709	129.68	277.766	111.233	277.709	112.406	277.766	111.31	277.709	112.388	277.766	108.305	277.709	111.625	277.766	111.315
278.178	107.673	278.121	115.207	278.178	107.741	278.121	115.214	278.121	113.018	278.121	113.016	278.121	113.016	278.121	113.018	278.121	125.076	278.178	108.274	278.121	108.725	278.178	108.34	278.121	108.694	278.178	105.722	278.121	108.016	278.178	108.345
278.591	109.44	278.533	118.312	278.591	109.515	278.533	118.319	278.533	115.715	278.533	115.713	278.533	115.712	278.533	115.714	278.533	128.714	278.591	109.901	278.533	111.298	278.591	109.981	278.533	111.283	278.591	106.909	278.533	110.504	278.591	109.986
279.003	110.11	278.945	117.733	279.003	110.18	278.945	117.74	278.945	115.421	278.945	115.42	278.945	115.42	278.945	115.421	278.945	127.774	279.003	110.671	278.945	111.089	279.003	110.741	278.945	111.062	279.003	107.991	278.945	110.356	279.003	110.746
279.415	107.27	279.357	116.57	279.415	107.346	279.357	116.576	279.357	113.914	279.357	113.912	279.357	113.913	279.357	113.913	279.357	127.035	279.415	107.709	279.357	109.484	279.415	107.79	279.357	109.471	279.415	104.654	279.357	108.679	279.415	107.795
279.827	111.589	279.769	119.339	279.827	111.661	279.769	119.346	279.769	116.944	279.769	116.943	279.769	116.943	279.769	116.944	279.769	129.492	279.827	112.125	279.769	112.586	279.827	112.197	279.769	112.563	279.827	109.36	279.769	111.836	279.827	112.202
280.239	104.246	280.181	114.096	280.239	104.323	280.181	114.102	280.181	111.414	280.181	111.41	280.181	111.412	280.181	111.411	280.181	124.585	280.239	104.682	280.181	106.985	280.239	104.763	280.181	106.973	280.239	101.648	280.181	106.175	280.239	104.768
280.651	112.366	280.593	120.25	280.651	112.439	280.593	120.256	280.593	117.792	280.593	117.791	280.593	117.79	280.593	117.792	280.593	130.486	280.651	112.881	280.593	113.414	280.651	112.956	280.593	113.393	280.651	110.052	280.593	112.65	280.651	112.96
281.063	102.39	281.005	111.77	281.063	102.461	281.005	111.777	281.005	109.238	281.005	109.235	281.005	109.236	281.005	109.236	281.005	122.064	281.063	102.929	281.005	104.871	281.063	102.999	281.005	104.853	281.063	100.252	281.005	104.096	281.063	103.004
281.475	112.539	281.417	120.571	281.475	112.613	281.417	120.577	281.417	118.059	281.417	118.057	281.417	118.057	281.417	118.058	281.417	130.876	281.475	113.037	281.417	113.664	281.475	113.113	281.417	113.645	281.475	110.152	281.417	112.889	281.475	113.118
281.887	104.802	281.829	112.347	281.887	104.87	281.829	112.353	281.829	110.07	281.829	110.069	281.829	110.07	281.829	110.069	281.829	122.304	281.887	105.402	281.829	105.773	281.887	105.466	281.829	105.744	281.887	102.87	281.829	105.048	281.887	105.471
282.3	112.142	282.241	120.346	282.3	112.217	282.241	120.353	282.241	117.782	282.241	117.78	282.241	117.781	282.241	117.782	282.241	130.714	282.3	112.623	282.241	113.372	282.3	112.702	282.241	113.354	282.3	109.686	282.241	112.586	282.3	112.707
282.712	108.018	282.653	115.068	282.712	108.087	282.653	115.074	282.653	112.784	282.653	112.782	282.653	112.782	282.653	112.783	282.653	125.054	282.712	108.59	282.653	108.468	282.712	108.658	282.653	108.441	282.712	105.953	282.653	107.74	282.712	108.662
283.124	111.156	283.066	119.571	283.124	111.232	283.066	119.578	283.066	116.954	283.066	116.953	283.066	116.953	283.066	116.954	283.066	130.003	283.124	111.621	283.066	112.529	283.124	111.701	283.066	112.513	283.124	108.629	283.066	111.731	283.124	111.705
283.536	110.368	283.478	117.497	283.536	110.44	283.478	117.504	283.478	115.134	283.478	115.132	283.478	115.132	283.478	115.133	283.478	127.602	283.536	110.912	283.478	110.788	283.536	110.984	283.478	110.763	283.536	108.179	283.478	110.044	283.536	110.988
283.948	109.519	283.89	118.198	283.948	109.595	283.89	118.204	283.89	115.524	283.89	115.523	283.89	115.522	283.89	115.523	283.89	128.694	283.948	109.966	283.89	111.082	283.948	110.047	283.89	111.069	283.948	106.919	283.89	110.272	283.948	110.052
284.36	111.902	284.302	119.193	284.36	111.975	284.302	119.2	284.302	116.759	284.302	116.758	284.302	116.758	284.302	116.759	284.302	129.395	284.36	112.425	284.302	112.39	284.36	112.499	284.302	112.368	284.36	109.62	284.302	111.631	284.36	112.504
284.772	107.261	284.714	116.198	284.772	107.338	284.714	116.204	284.714	113.47	284.714	113.468	284.714	113.468	284.714	113.469	284.714	126.752	284.772	107.694	284.714	109.016	284.772	107.776	284.714	109.005	284.772	104.615	284.714	108.194	284.772	107.781
285.184	112.777	285.126	120.23	285.184	112.851	285.126	120.236	285.126	117.738	285.126	117.736	285.126	117.736	285.126	117.737	285.126	130.509	285.184	113.283	285.126	113.349	285.184	113.358	285.126	113.329	285.184	110.421	285.126	112.578	285.184	113.363
285.597	105.125	285.538	113.863	285.597	105.201	285.538	113.869	285.538	111.137	285.538	111.136	285.538	111.136	285.538	111.137	285.538	124.402	285.597	105.581	285.538	106.695	285.597	105.661	285.538	106.684	285.597	102.6	285.538	105.876	285.597	105.666
286.009	113.086	285.95	120.695	286.009	113.161	285.95	120.702	285.95	118.152	285.95	118.15	285.95	118.15	285.95	118.151	285.95	131.042	286.009	113.576	285.95	113.746	286.009	113.653	285.95	113.728	286.009	110.663	285.95	112.964	286.009	113.658
286.421	105.309	286.362	112.735	286.421	105.38	286.362	112.741	286.362	110.187	286.362	110.185	286.362	110.185	286.362	110.185	286.362	123.049	286.421	105.833	286.362	105.808	286.421	105.905	286.362	105.791	286.421	103.069	286.362	105.028	286.421	105.909
286.833	112.865	286.774	120.633	286.833	112.939	286.774	120.64	286.774	118.039	286.774	118.038	286.774	118.037	286.774	118.039	286.774	131.043	286.833	113.339	286.774	113.617	286.833	113.418	286.774	113.602	286.833	110.377	286.774	112.825	286.833	113.423
287.245	107.594	287.186	114.188	287.245	107.665	287.186	114.196	287.186	111.783	287.186	111.78	287.186	111.781	287.186	111.782	287.186	124.328	287.245	108.134	287.186	107.438	287.245	108.206	287.186	107.415	287.245	105.404	287.186	106.686	287.245	108.211
287.657	112.106	287.598	120.047	287.657	112.182	287.598	120.054	287.598	117.4	287.598	117.399	287.598	117.398	287.598	117.399	287.598	130.521	287.657	112.566	287.598	112.962	287.657	112.646	287.598	112.947	287.657	109.551	287.598	112.158	287.657	112.651
288.069	109.855	288.01	116.46	288.069	109.927	288.01	116.467	288.01	114.041	288.01	114.039	288.01	114.039	288.01	114.04	288.01	126.63	288.069	110.382	288.01	109.682	288.069	110.455	288.01	109.66	288.069	107.598	288.01	108.927	288.069	110.46
288.481	110.779	288.422	118.904	288.481	110.855	288.422	118.911	288.422	116.198	288.422	116.196	288.422	116.195	288.422	116.196	288.422	129.449	288.481	111.219	288.422	111.741	288.481	111.301	288.422	111.73	288.481	108.148	288.422	110.924	288.481	111.306
288.893	111.487	288.834	118.288	288.893	111.561	288.834	118.295	288.834	115.815	288.834	115.814	288.834	115.814	288.834	115.815	288.834	128.534	288.893	111.998	288.834	111.436	288.893	112.073	288.834	111.415	288.893	109.155	288.834	110.669	288.893	112.078
289.306	108.853	289.246	117.144	289.306	108.93	289.246	117.151	289.246	114.366	289.246	114.365	289.246	114.364	289.246	114.365	289.246	127.769	289.306	109.275	289.246	109.889	289.306	109.359	289.246	109.881	289.306	106.144	289.246	109.056	289.306	109.363
289.718	112.497	289.658	119.492	289.718	112.571	289.658	119.499	289.658	116.966	289.658	116.964	289.658	116.964	289.658	116.965	289.658	129.813	289.718	112.992	289.658	112.567	289.718	113.069	289.658	112.549	289.718	110.096	289.658	111.789	289.718	113.073
290.13	106.597	290.07	114.808	290.13	106.675	290.07	114.814	290.07	111.962	290.07	111.96	290.07	111.96	290.07	111.96	290.07	125.502	290.13	107.009	290.07	107.47	290.13	107.093	290.07	107.465	290.13	103.862	290.07	106.623	290.13	107.098
290.542	112.947	290.482	120.115	290.542	113.022	290.482	120.121	290.482	117.537	290.482	117.535	290.482	117.535	290.482	117.536	290.482	130.503	290.542	113.427	290.482	113.121	290.542	113.506	290.482	113.104	290.542	110.482	290.482	112.331	290.542	113.51
290.954	105.328	290.894	112.605	290.954	105.405	290.894	112.611	290.894	109.796	290.894	109.795	290.894	109.795	290.894	109.795	290.894	123.241	290.954	105.777	290.894	105.333	290.954	105.857	290.894	105.325	290.954	102.77	290.894	104.496	290.954	105.862
291.366	112.877	291.306	120.201	291.366	112.952	291.306	120.208	291.306	117.571	291.306	117.57	291.306	117.57	291.306	117.571	291.306	130.655	291.366	113.342	291.306	113.138	291.366	113.422	291.306	113.124	291.366	110.348	291.306	112.338	291.366	113.427
291.778	106.452	291.718	112.55	291.778	106.525	291.718	112.556	291.718	109.962	291.718	109.961	291.718	109.961	291.718	109.961	291.718	122.913	291.778	106.951	291.718	105.572	291.778	107.026	291.718	105.556	291.778	104.098	291.718	104.784	291.778	107.031
292.19	112.287	292.13	119.76	292.19	112.363	292.13	119.766	292.13	117.074	292.13	117.073	292.13	117.072	292.13	117.074	292.13	130.284	292.19	112.736	292.13	112.623	292.19	112.818	292.13	112.61	292.19	109.689	292.13	111.81	292.19	112.822
292.603	108.562	292.542	114.538	292.603	108.635	292.542	114.544	292.542	112.048	292.542	112.046	292.542	112.046	292.542	112.046	292.542	124.787	292.603	109.069	292.542	107.675	292.603	109.144	292.542	107.656	292.603	106.226	292.542	106.906	292.603	109.148
293.015	111.143	292.954	118.76	293.015	111.221	292.954	118.766	292.954	116.008	292.954	116.007	292.954	116.006	292.954	116.007	292.954	129.363	293.015	111.575	292.954	111.535	293.015	111.658	292.954	111.525	293.015	108.466	292.954	110.708	293.015	111.663
293.427	110.333	293.366	116.571	293.427	110.407	293.366	116.578	293.366	114.059	293.366	114.057	293.366	114.058	293.366	114.058	293.366	126.858	293.427	110.83	293.366	109.673	293.427	110.906	293.366	109.653	293.427	107.947	293.366	108.898	293.427	110.911
293.839	109.394	293.778	117.126	293.839	109.473	293.778	117.132	293.778	114.288	293.778	114.287	293.778	114.287	293.778	114.288	293.778	127.827	293.839	109.802	293.778	109.789	293.839	109.888	293.778	109.783	293.839	106.617	293.778	108.943	293.839	109.893
294.251	111.509	294.19	118.003	294.251	111.583	294.19	118.01	294.19	115.441	294.19	115.44	294.19	115.44	294.19	115.441	294.19	128.36	294.251	111.992	294.19	111.035	294.251	112.07	294.19	111.018	294.251	109.06	294.19	110.25	294.251	112.075
294.663	107.056	294.602	114.748	294.663	107.135	294.602	114.754	294.602	111.795	294.602	111.793	294.602	111.792	294.602	111.793	294.602	125.577	294.663	107.437	294.602	107.261	294.663	107.525	294.602	107.26	294.663	104.169	294.602	106.388	294.663	107.529
295.075	112.112	295.014	118.81	295.075	112.187	295.014	118.817	295.014	116.195	295.014	116.194	295.014	116.194	295.014	116.195	295.014	129.24	295.075	112.581	295.014	111.77	295.075	112.66	295.014	111.755	295.075	109.6	295.014	110.973	295.075	112.665
295.487	104.77	295.426	111.763	295.487	104.849	295.426	111.77	295.426	108.696	295.426	108.693	295.426	108.693	295.426	108.694	295.426	122.703	295.487	105.146	295.426	104.139	295.487	105.234	295.426	104.144	295.487	101.887	295.426	103.241	295.487	105.239
295.899	112.175	295.838	119.036	295.899	112.251	295.838	119.042	295.838	116.364	295.838	116.363	295.838	116.362	295.838	116.364	295.838	129.539	295.899	112.629	295.838	111.919	295.899	112.71	295.838	111.906	295.899	109.597	295.838	111.109	295.899	112.715
296.312	104.504	296.251	109.92	296.312	104.58	296.251	109.926	296.251	107.036	296.251	107.033	296.251	107.033	296.251	107.033	296.251	120.645	296.312	104.941	296.251	102.567	296.312	105.022	296.251	102.563	296.312	101.904	296.251	101.718	296.312	105.027
296.724	111.707	296.663	118.7	296.724	111.784	296.663	118.706	296.663	115.964	296.663	115.963	296.663	115.963	296.663	115.964	296.663	129.281	296.724	112.145	296.663	111.498	296.724	112.228	296.663	111.487	296.724	109.055	296.663	110.674	296.724	112.232
297.136	106.37	297.075	111.474	297.136	106.444	297.075	111.48	297.075	108.903	297.075	108.9	297.075	108.901	297.075	108.901	297.075	121.817	297.136	106.849	297.075	104.524	297.136	106.927	297.075	104.507	297.136	103.935	297.075	103.741	297.136	106.932
297.548	110.672	297.487	117.769	297.548	110.749	297.487	117.775	297.487	114.957	297.487	114.955	297.487	114.954	297.487	114.956	297.487	128.445	297.548	111.088	297.487	110.463	297.548	111.173	297.487	110.456	297.548	107.929	297.487	109.622	297.548	111.178
297.96	108.37	297.899	113.947	297.96	108.445	297.899	113.954	297.899	111.412	297.899	111.411	297.899	111.412	297.899	111.412	297.899	124.249	297.96	108.852	297.899	107.03	297.96	108.93	297.899	107.011	297.96	105.929	297.899	106.252	297.96	108.934
298.372	108.983	298.311	116.145	298.372	109.063	298.311	116.151	298.311	113.225	298.311	113.224	298.311	113.223	298.311	113.225	298.311	126.946	298.372	109.373	298.311	108.696	298.372	109.46	298.311	108.694	298.372	106.119	298.311	107.831	298.372	109.465
298.784	109.783	298.723	115.755	298.784	109.858	298.723	115.762	298.723	113.173	298.723	113.172	298.723	113.172	298.723	113.173	298.723	126.126	298.784	110.254	298.723	108.768	298.784	110.333	298.723	108.751	298.784	107.287	298.723	107.978	298.784	110.338
299.196	106.519	299.135	113.611	299.196	106.6	299.135	113.617	299.135	110.521	299.135	110.52	299.135	110.519	299.135	110.521	299.135	124.6	299.196	106.868	299.135	105.936	299.196	106.96	299.135	105.941	299.196	103.478	299.135	105.031	299.196	106.964
299.608	110.561	299.547	116.793	299.608	110.636	299.547	116.799	299.547	114.149	299.547	114.147	299.547	114.146	299.547	114.147	299.547	127.25	299.608	111.016	299.547	109.718	299.608	111.097	299.547	109.705	299.608	107.996	299.547	108.915	299.608	111.101
300.021	103.369	299.959	109.811	300.021	103.452	299.959	109.817	299.959	106.415	299.959	106.414	299.959	106.412	299.959	106.413	299.959	121.108	300.021	103.668	299.959	101.736	300.021	103.764	299.959	101.755	300.021	100.122	299.959	100.757	300.021	103.769
300.433	110.744	300.371	117.145	300.433	110.821	300.371	117.152	300.371	114.431	300.371	114.429	300.371	114.43	300.371	114.43	300.371	127.691	300.433	111.183	300.371	109.977	300.433	111.266	300.371	109.965	300.433	108.105	300.371	109.158	300.433	111.271
300.845	101.364	300.783	105.45	300.845	101.443	300.783	105.457	300.783	101.963	300.783	101.958	300.783	101.957	300.783	101.959	300.783	116.859	300.845	101.7	300.783	97.3394	300.845	101.791	300.783	97.3627	300.845	98.3539	300.783	96.365	300.845	101.796
301.257	110.344	301.195	116.848	301.257	110.422	301.195	116.855	301.195	114.053	301.195	114.052	301.195	114.051	301.195	114.052	301.195	127.495	301.257	110.765	301.195	109.57	301.257	110.849	301.195	109.562	301.257	107.619	301.195	108.733	301.257	110.854
301.669	103.024	301.607	106.925	301.669	103.098	301.607	106.931	301.607	104.437	301.607	104.433	301.607	104.434	301.607	104.434	301.607	117.201	301.669	103.474	301.607	100.131	301.669	103.553	301.607	100.111	301.669	100.501	301.607	99.3794	301.669	103.558
302.081	109.327	302.019	115.872	302.081	109.407	302.019	115.878	302.019	112.974	302.019	112.972	302.019	112.972	302.019	112.973	302.019	126.644	302.081	109.722	302.019	108.456	302.081	109.809	302.019	108.452	302.081	106.491	302.019	107.595	302.081	109.814
302.493	105.568	302.431	110.7	302.493	105.642	302.431	110.708	302.431	108.284	302.431	108.283	302.431	108.283	302.431	108.285	302.431	120.84	302.493	106.042	302.431	103.957	302.493	106.121	302.431	103.934	302.493	103.113	302.431	103.206	302.493	106.125
302.905	107.564	302.843	114.067	302.905	107.645	302.843	114.074	302.843	111.015	302.843	111.014	302.843	111.013	302.843	111.015	302.843	125.014	302.905	107.924	302.843	106.444	302.905	108.016	302.843	106.446	302.905	104.568	302.843	105.548	302.905	108.021
303.318	107.369	303.255	113.125	303.318	107.443	303.255	113.132	303.255	110.613	303.255	110.61	303.255	110.61	303.255	110.611	303.255	123.399	303.318	107.832	303.255	106.238	303.318	107.912	303.255	106.221	303.318	104.854	303.255	105.465	303.318	107.916
303.73	104.797	303.667	111.059	303.73	104.881	303.667	111.066	303.667	107.73	303.667	107.727	303.667	107.727	303.667	107.728	303.667	122.31	303.73	105.097	303.667	103.059	303.73	105.194	303.667	103.075	303.73	101.528	303.667	102.095	303.73	105.198
304.142	108.352	304.079	114.41	304.142	108.429	304.079	114.417	304.079	111.795	304.079	111.794	304.079	111.794	304.079	111.796	304.079	124.814	304.142	108.799	304.079	107.385	304.142	108.88	304.079	107.37	304.142	105.753	304.079	106.589	304.142	108.885
304.554	100.522	304.491	105.726	304.554	100.613	304.491	105.733	304.491	101.634	304.491	101.633	304.491	101.631	304.491	101.635	304.491	117.688	304.554	100.7	304.491	96.6889	304.554	100.81	304.491	96.7405	304.554	96.694	304.491	95.5156	304.554	100.815
304.966	108.62	304.903	114.815	304.966	108.697	304.903	114.821	304.903	112.1	304.903	112.098	304.903	112.098	304.903	112.098	304.903	125.35	304.966	109.044	304.903	107.653	304.966	109.128	304.903	107.643	304.966	105.923	304.903	106.835	304.966	109.132
305.378	95.8234	305.315	95.4598	305.378	95.9156	305.315	95.4677	305.315	91.4618	305.315	91.4539	305.315	91.4675	305.315	91.4571	305.315	108.753	305.378	95.9581	305.315	87.5089	305.378	96.068	305.315	87.4679	305.378	92.0663	305.315	86.9476	305.378	96.0726
305.79	108.197	305.727	114.417	305.79	108.275	305.727	114.423	305.727	111.585	305.727	111.583	305.727	111.582	305.727	111.584	305.727	125.093	305.79	108.596	305.727	107.098	305.79	108.682	305.727	107.093	305.79	105.382	305.727	106.254	305.79	108.687
306.202	98.704	306.139	104.098	306.202	98.7782	306.139	104.106	306.139	102.578	306.139	102.577	306.139	102.581	306.139	102.58	306.139	112.956	306.202	99.2136	306.139	98.5434	306.202	99.2854	306.139	98.4851	306.202	96.5281	306.139	97.9707	306.202	99.29
306.614	107.035	306.551	113.164	306.614	107.116	306.551	113.171	306.551	110.174	306.551	110.172	306.551	110.172	306.551	110.173	306.551	124.022	306.614	107.399	306.551	105.636	306.614	107.49	306.551	105.636	306.614	104.062	306.551	104.755	306.614	107.494
307.027	102.66	306.963	109.34	307.027	102.731	306.963	109.347	306.963	107.296	306.963	107.294	306.963	107.295	306.963	107.295	306.963	118.969	307.027	103.181	306.963	103.073	307.027	103.253	306.963	103.037	307.027	100.438	306.963	102.395	307.027	103.258
307.439	104.931	307.375	110.767	307.439	105.015	307.375	110.773	307.375	107.513	307.375	107.51	307.375	107.51	307.375	107.511	307.375	121.916	307.439	105.239	307.375	102.886	307.439	105.335	307.375	102.898	307.439	101.704	307.375	101.941	307.439	105.34
307.851	104.961	307.787	111.92	307.851	105.034	307.787	111.927	307.787	109.632	307.787	109.63	307.787	109.631	307.787	109.631	307.787	121.895	307.851	105.452	307.787	105.328	307.851	105.528	307.787	105.301	307.851	102.584	307.787	104.601	307.851	105.533
308.263	101.329	308.199	106.324	308.263	101.417	308.199	106.33	308.199	102.43	308.199	102.427	308.199	102.425	308.199	102.427	308.199	118.099	308.263	101.524	308.199	97.5806	308.263	101.632	308.199	97.6245	308.263	97.5725	308.199	96.4686	308.263	101.637
308.675	106.097	308.611	113.145	308.675	106.173	308.611	113.151	308.611	110.7	308.611	110.698	308.611	110.698	308.611	110.699	308.611	123.33	308.675	106.558	308.611	106.345	308.675	106.638	308.611	106.324	308.675	103.577	308.611	105.586	308.675	106.642
309.087	94.3304	309.024	94.9812	309.087	94.433	309.024	94.9885	309.024	87.1722	309.024	87.1307	309.024	87.1485	309.024	87.1327	309.024	109.648	309.087	94.1363	309.024	81.7714	309.087	94.2855	309.024	81.9337	309.087	88.6021	309.024	80.4266	309.087	94.2901
309.499	106.324	309.436	113.391	309.499	106.402	309.436	113.398	309.436	110.817	309.436	110.816	309.436	110.817	309.436	110.817	309.436	123.742	309.499	106.752	309.436	106.424	309.499	106.835	309.436	106.407	309.499	103.659	309.436	105.638	309.499	106.84
309.911	88.902	309.848	100.751	309.911	88.9484	309.848	100.758	309.848	100.282	309.848	100.281	309.848	100.283	309.848	100.282	309.848	107.408	309.911	89.8482	309.848	96.4635	309.911	89.865	309.848	96.3786	309.911	89.0104	309.848	96.0436	309.911	89.8695
310.324	105.703	310.26	112.751	310.324	105.781	310.26	112.756	310.26	110.046	310.26	110.045	310.26	110.043	310.26	110.045	310.26	123.26	310.324	106.094	310.26	105.613	310.324	106.18	310.26	105.603	310.324	102.869	310.26	104.799	310.324	106.184
310.736	98.4493	310.672	108.075	310.736	98.5118	310.672	108.082	310.672	106.421	310.672	106.42	310.672	106.423	310.672	106.422	310.672	117.117	310.736	99.1936	310.672	102.29	310.736	99.2431	310.672	102.238	310.736	97.1478	310.672	101.681	310.736	99.2477
311.148	104.119	311.084	111.1	311.148	104.2	311.084	111.106	311.084	108.237	311.084	108.234	311.084	108.233	311.084	108.234	311.084	121.8	311.148	104.454	311.084	103.762	311.148	104.546	311.084	103.758	311.148	101.042	311.084	102.914	311.148	104.551
311.56	102.547	311.496	111.483	311.56	102.614	311.496	111.49	311.496	109.465	311.496	109.463	311.496	109.464	311.496	109.464	311.496	121.094	311.56	103.167	311.496	105.227	311.56	103.23	311.496	105.189	311.56	100.71	311.496	104.55	311.56	103.234
311.972	101.138	311.908	108.038	311.972	101.224	311.908	108.044	311.908	104.958	311.908	104.956	311.908	104.956	311.908	104.956	311.908	118.989	311.972	101.374	311.908	100.444	311.972	101.476	311.908	100.447	311.972	97.6188	311.908	99.5547	311.972	101.48
312.384	104.631	312.32	113.317	312.384	104.701	312.32	113.323	312.32	111.108	312.32	111.107	312.32	111.107	312.32	111.108	312.32	123.197	312.384	105.189	312.32	106.814	312.384	105.258	312.32	106.784	312.384	102.526	312.32	106.101	312.384	105.263
312.796	95.3642	312.732	102.939	312.796	95.4663	312.732	102.945	312.732	99.9721	312.732	99.9694	312.732	99.9737	312.732	99.9697	312.732	113.95	312.796	95.3437	312.732	95.6253	312.796	95.4715	312.732	95.6139	312.796	90.7121	312.732	94.8197	312.796	95.476
313.208	105.552	313.144	114.167	313.208	105.625	313.144	114.174	313.144	111.832	313.144	111.832	313.144	111.832	313.144	111.833	313.144	124.216	313.208	106.068	313.144	107.503	313.208	106.142	313.144	107.477	313.208	103.266	313.144	106.765	313.208	106.146
313.62	87.9664	313.556	102.282	313.62	88.0074	313.556	102.29	313.556	101.079	313.556	101.076	313.556	101.079	313.556	101.078	313.556	110.653	313.62	88.9241	313.556	97.1335	313.62	88.9363	313.556	97.0684	313.62	88.2846	313.556	96.6166	313.62	88.9407
314.033	105.576	313.968	114.238	314.033	105.651	313.968	114.246	313.968	111.808	313.968	111.807	313.968	111.807	313.968	111.808	313.968	124.412	314.033	106.055	313.968	107.452	314.033	106.133	313.968	107.43	314.033	103.14	313.968	106.695	314.033	106.138
314.445	97.5546	314.38	107.926	314.445	97.6092	314.38	107.932	314.38	106.279	314.38	106.277	314.38	106.279	314.38	106.278	314.38	116.956	314.445	98.414	314.38	102.148	314.445	98.4517	314.38	102.098	314.445	96.6549	314.38	101.54	314.445	98.4564
314.857	104.75	314.792	113.595	314.857	104.826	314.792	113.602	314.792	111.086	314.792	111.084	314.792	111.084	314.792	111.085	314.792	123.867	314.857	105.194	314.792	106.71	314.857	105.275	314.792	106.69	314.857	102.169	314.792	105.936	314.857	105.28
315.269	102.326	315.204	111.636	315.269	102.391	315.204	111.643	315.204	109.658	315.204	109.657	315.204	109.658	315.204	109.659	315.204	121.196	315.269	103.019	315.204	105.427	315.269	103.076	315.204	105.387	315.269	100.75	315.204	104.759	315.269	103.08
315.681	102.974	315.616	112.234	315.681	103.052	315.616	112.241	315.616	109.668	315.616	109.666	315.616	109.666	315.616	109.667	315.616	122.57	315.681	103.38	315.616	105.283	315.681	103.465	315.616	105.266	315.681	100.247	315.616	104.499	315.681	103.469
316.093	104.933	316.028	113.905	316.093	105	316.028	113.912	316.028	111.749	316.028	111.747	316.028	111.747	316.028	111.748	316.028	123.731	316.093	105.548	316.028	107.462	316.093	105.612	316.028	107.43	316.093	103.048	316.028	106.759	316.093	105.617
316.505	100.094	316.44	110.254	316.505	100.172	316.44	110.261	316.44	107.712	316.44	107.71	316.44	107.711	316.44	107.712	316.44	120.559	316.505	100.474	316.44	103.35	316.505	100.561	316.44	103.332	316.505	97.3186	316.44	102.575	316.505	100.566
316.917	106.371	316.852	115.244	316.917	106.442	316.852	115.25	316.852	112.97	316.852	112.969	316.852	112.97	316.852	112.97	316.852	125.228	316.917	106.942	316.852	108.651	316.917	107.011	316.852	108.622	316.917	104.303	316.852	107.924	316.917	107.015
317.329	97.1913	317.264	108.551	317.329	97.2634	317.264	108.556	317.264	106.257	317.264	106.256	317.264	106.257	317.264	106.256	317.264	118.531	317.329	97.7176	317.264	101.982	317.329	97.7845	317.264	101.953	317.329	95.1339	317.264	101.26	317.329	97.789
317.742	106.989	317.676	115.883	317.742	107.061	317.676	115.89	317.676	113.525	317.676	113.523	317.676	113.523	317.676	113.525	317.676	125.979	317.742	107.529	317.676	109.18	317.742	107.601	317.676	109.155	317.742	104.791	317.676	108.436	317.742	107.606
318.154	98.8622	318.088	109.18	318.154	98.9215	318.088	109.186	318.088	107.155	318.088	107.153	318.088	107.153	318.088	107.154	318.088	118.78	318.154	99.5846	318.088	102.935	318.154	99.6349	318.088	102.899	318.154	97.4696	318.088	102.26	318.154	99.6395
318.566	106.929	318.5	115.936	318.566	107.001	318.5	115.942	318.5	113.51	318.5	113.509	318.5	113.509	318.5	113.51	318.5	126.116	318.566	107.444	318.5	109.147	318.566	107.518	318.5	109.125	318.566	104.63	318.5	108.39	318.566	107.523
318.978	102.539	318.912	111.58	318.978	102.604	318.912	111.586	318.912	109.516	318.912	109.515	318.912	109.516	318.912	109.516	318.912	121.253	318.978	103.215	318.912	105.267	318.978	103.273	318.912	105.23	318.978	100.902	318.912	104.582	318.978	103.277
319.39	106.251	319.324	115.465	319.39	106.325	319.324	115.471	319.324	112.986	319.324	112.985	319.324	112.985	319.324	112.986	319.324	125.707	319.39	106.747	319.324	108.61	319.39	106.823	319.324	108.589	319.39	103.874	319.324	107.842	319.39	106.827
319.802	105.287	319.736	113.862	319.802	105.354	319.736	113.869	319.736	111.683	319.736	111.681	319.736	111.681	319.736	111.682	319.736	123.717	319.802	105.905	319.736	107.391	319.802	105.969	319.736	107.359	319.802	103.41	319.736	106.683	319.802	105.974
320.214	105.018	320.148	114.532	320.214	105.092	320.148	114.539	320.148	112.02	320.148	112.019	320.148	112.019	320.148	112.021	320.148	124.812	320.214	105.501	320.148	107.638	320.214	105.578	320.148	107.619	320.214	102.601	320.148	106.864	320.214	105.583
320.626	107.087	320.56	115.531	320.626	107.156	320.56	115.537	320.56	113.252	320.56	113.251	320.56	113.25	320.56	113.251	320.56	125.526	320.626	107.668	320.56	108.928	320.626	107.735	320.56	108.9	320.626	105.049	320.56	108.2	320.626	107.74
321.039	103.517	320.972	113.333	321.039	103.591	320.972	113.341	320.972	110.831	320.972	110.829	320.972	110.83	320.972	110.831	320.972	123.596	321.039	104.011	320.972	106.458	321.039	104.087	320.972	106.438	321.039	101.165	320.972	105.686	321.039	104.092
321.451	108.155	321.384	116.597	321.451	108.226	321.384	116.604	321.384	114.241	321.384	114.239	321.384	114.24	321.384	114.241	321.384	126.697	321.451	108.707	321.384	109.894	321.451	108.778	321.384	109.868	321.451	106	321.384	109.151	321.451	108.783
321.863	102.677	321.796	112.398	321.863	102.746	321.796	112.404	321.796	109.975	321.796	109.972	321.796	109.973	321.796	109.974	321.796	122.555	321.863	103.221	321.796	105.628	321.863	103.292	321.796	105.607	321.863	100.547	321.796	104.873	321.863	103.297
322.275	108.626	322.209	117.135	322.275	108.698	322.209	117.141	322.209	114.715	322.209	114.714	322.209	114.714	322.209	114.715	322.209	127.316	322.275	109.158	322.209	110.349	322.275	109.23	322.209	110.326	322.275	106.382	322.209	109.593	322.275	109.235
322.687	103.521	322.621	112.505	322.687	103.59	322.621	112.512	322.621	110.186	322.621	110.184	322.621	110.185	322.621	110.185	322.621	122.527	322.687	104.113	322.621	105.867	322.687	104.179	322.621	105.841	322.687	101.559	322.621	105.133	322.687	104.183
323.099	108.583	323.033	117.199	323.099	108.656	323.033	117.206	323.033	114.728	323.033	114.726	323.033	114.726	323.033	114.727	323.033	127.449	323.099	109.096	323.033	110.346	323.099	109.17	323.033	110.325	323.099	106.265	323.033	109.579	323.099	109.175
323.511	105.37	323.445	113.672	323.511	105.44	323.445	113.678	323.445	111.38	323.445	111.379	323.445	111.38	323.445	111.38	323.445	123.664	323.511	105.96	323.445	107.063	323.511	106.027	323.445	107.035	323.511	103.381	323.445	106.333	323.511	106.032
323.923	108.082	323.857	116.839	323.923	108.157	323.857	116.846	323.857	114.322	323.857	114.321	323.857	114.32	323.857	114.322	323.857	127.141	323.923	108.582	323.857	109.928	323.923	108.658	323.857	109.909	323.923	105.708	323.857	109.152	323.923	108.662
324.335	107.149	324.269	115.148	324.335	107.219	324.269	115.154	324.269	112.821	324.269	112.819	324.269	112.819	324.269	112.82	324.269	125.2	324.335	107.718	324.269	108.486	324.335	107.787	324.269	108.46	324.335	105.066	324.269	107.749	324.335	107.792
324.748	107.23	324.681	116.123	324.748	107.303	324.681	116.129	324.681	113.572	324.681	113.571	324.681	113.57	324.681	113.571	324.681	126.463	324.748	107.719	324.681	109.17	324.748	107.796	324.681	109.153	324.748	104.822	324.681	108.387	324.748	107.8
325.16	108.48	325.093	116.405	325.16	108.552	325.093	116.412	325.093	114.024	325.093	114.023	325.093	114.023	325.093	114.024	325.093	126.536	325.16	109.029	325.093	109.67	325.16	109.1	325.093	109.645	325.16	106.306	325.093	108.922	325.16	109.105
325.572	106.261	325.505	115.197	325.572	106.334	325.505	115.204	325.505	112.635	325.505	112.633	325.505	112.633	325.505	112.634	325.505	125.547	325.572	106.752	325.505	108.233	325.572	106.829	325.505	108.216	325.572	103.869	325.505	107.448	325.572	106.834
325.984	109.323	325.917	117.276	325.984	109.395	325.917	117.282	325.917	114.841	325.917	114.839	325.917	114.839	325.917	114.84	325.917	127.481	325.984	109.853	325.917	110.469	325.984	109.925	325.917	110.447	325.984	107.069	325.917	109.709	325.984	109.93
326.396	105.676	326.329	114.394	326.396	105.749	326.329	114.4	326.329	111.856	326.329	111.854	326.329	111.855	326.329	111.855	326.329	124.708	326.396	106.185	326.329	107.465	326.396	106.26	326.329	107.447	326.396	103.362	326.329	106.685	326.396	106.264
326.808	109.701	326.741	117.727	326.808	109.775	326.741	117.734	326.741	115.241	326.741	115.24	326.741	115.24	326.741	115.241	326.741	127.996	326.808	110.215	326.741	110.854	326.808	110.29	326.741	110.833	326.808	107.379	326.741	110.084	326.808	110.294
327.22	105.961	327.153	114.176	327.22	106.033	327.153	114.182	327.153	111.692	327.153	111.691	327.153	111.691	327.153	111.691	327.153	124.42	327.22	106.492	327.153	107.318	327.22	106.564	327.153	107.299	327.22	103.733	327.153	106.55	327.22	106.569
327.632	109.661	327.565	117.778	327.632	109.734	327.565	117.785	327.565	115.247	327.565	115.245	327.565	115.245	327.565	115.246	327.565	128.107	327.632	110.159	327.565	110.845	327.632	110.236	327.565	110.827	327.632	107.278	327.565	110.065	327.632	110.24
328.044	106.978	327.977	114.715	328.044	107.049	327.977	114.722	327.977	112.27	327.977	112.269	327.977	112.269	327.977	112.27	327.977	124.914	328.044	107.516	327.977	107.905	328.044	107.588	327.977	107.883	328.044	104.771	327.977	107.144	328.044	107.593
328.457	109.243	328.389	117.454	328.457	109.318	328.389	117.461	328.389	114.88	328.389	114.878	328.389	114.878	328.389	114.879	328.389	127.834	328.457	109.73	328.389	110.466	328.457	109.807	328.389	110.449	328.457	106.809	328.389	109.677	328.457	109.812
328.869	108.176	328.801	115.675	328.869	108.249	328.801	115.681	328.801	113.228	328.801	113.227	328.801	113.228	328.801	113.228	328.801	125.882	328.869	108.708	328.801	108.859	328.869	108.781	328.801	108.837	328.869	105.937	328.801	108.098	328.869	108.786
329.281	108.536	329.213	116.806	329.281	108.61	329.213	116.813	329.213	114.195	329.213	114.193	329.213	114.193	329.213	114.194	329.213	127.23	329.281	109.011	329.213	109.771	329.281	109.09	329.213	109.756	329.281	106.063	329.213	108.975	329.281	109.095
329.693	109.183	329.625	116.627	329.693	109.256	329.625	116.633	329.625	114.152	329.625	114.151	329.625	114.151	329.625	114.152	329.625	126.876	329.693	109.703	329.625	109.77	329.693	109.777	329.625	109.75	329.693	106.89	329.625	109.003	329.693	109.782
330.105	107.716	330.037	115.949	330.105	107.791	330.037	115.956	330.037	113.313	330.037	113.311	330.037	113.311	330.037	113.312	330.037	126.397	330.105	108.189	330.037	108.884	330.105	108.268	330.037	108.87	330.105	105.234	330.037	108.082	330.105	108.272
330.517	109.848	330.449	117.327	330.517	109.922	330.449	117.333	330.449	114.813	330.449	114.812	330.449	114.812	330.449	114.813	330.449	127.63	330.517	110.355	330.449	110.418	330.517	110.431	330.449	110.399	330.517	107.497	330.449	109.643	330.517	110.435
330.929	107.115	330.861	115.12	330.929	107.191	330.861	115.127	330.861	112.484	330.861	112.482	330.861	112.483	330.861	112.484	330.861	125.562	330.929	107.595	330.861	108.059	330.929	107.673	330.861	108.045	330.929	104.663	330.861	107.258	330.929	107.678
331.341	110.139	331.273	117.688	331.341	110.213	331.273	117.695	331.273	115.132	331.273	115.131	331.273	115.131	331.273	115.132	331.273	128.047	331.341	110.632	331.273	110.723	331.341	110.709	331.273	110.706	331.341	107.731	331.273	109.938	331.341	110.714
331.754	107.086	331.685	114.678	331.754	107.159	331.685	114.684	331.685	112.073	331.685	112.071	331.685	112.071	331.685	112.072	331.685	125.079	331.754	107.578	331.685	107.659	331.754	107.654	331.685	107.644	331.754	104.687	331.685	106.864	331.754	107.659
332.166	110.06	332.097	117.687	332.166	110.135	332.097	117.694	332.097	115.088	332.097	115.086	332.097	115.086	332.097	115.087	332.097	128.101	332.166	110.541	332.097	110.665	332.166	110.619	332.097	110.649	332.166	107.597	332.097	109.871	332.166	110.624
332.578	107.651	332.509	114.85	332.578	107.724	332.509	114.856	332.509	112.282	332.509	112.281	332.509	112.281	332.509	112.282	332.509	125.204	332.578	108.153	332.509	107.88	332.578	108.228	332.509	107.863	332.578	105.286	332.509	107.093	332.578	108.232
332.99	109.64	332.921	117.33	332.99	109.715	332.921	117.337	332.921	114.687	332.921	114.685	332.921	114.685	332.921	114.686	332.921	127.798	332.99	110.107	332.921	110.251	332.99	110.187	332.921	110.236	332.99	107.125	332.921	109.447	332.99	110.192
333.402	108.489	333.333	115.482	333.402	108.563	333.333	115.489	333.333	112.93	333.333	112.928	333.333	112.928	333.333	112.929	333.333	125.823	333.402	108.989	333.333	108.529	333.402	109.066	333.333	108.512	333.402	106.117	333.333	107.745	333.402	109.07
333.814	108.941	333.745	116.649	333.814	109.016	333.745	116.655	333.745	113.962	333.745	113.96	333.745	113.959	333.745	113.961	333.745	127.166	333.814	109.398	333.745	109.512	333.814	109.479	333.745	109.501	333.814	106.382	333.745	108.699	333.814	109.483
334.226	109.259	334.157	116.212	334.226	109.333	334.157	116.219	334.157	113.647	334.157	113.646	334.157	113.646	334.157	113.647	334.157	126.573	334.226	109.753	334.157	109.24	334.226	109.83	334.157	109.223	334.226	106.855	334.157	108.453	334.226	109.835
334.638	108.108	334.569	115.731	334.638	108.184	334.569	115.737	334.569	113.007	334.569	113.005	334.569	113.005	334.569	113.006	334.569	126.288	334.638	108.559	334.569	108.549	334.638	108.639	334.569	108.538	334.638	105.523	334.569	107.728	334.638	108.644
335.05	109.778	334.981	116.774	335.05	109.853	334.981	116.781	334.981	114.181	334.981	114.179	334.981	114.179	334.981	114.18	334.981	127.177	335.05	110.262	334.981	109.762	335.05	110.34	334.981	109.746	335.05	107.329	334.981	108.969	335.05	110.345
335.463	107.409	335.393	114.776	335.463	107.485	335.393	114.782	335.393	112.035	335.393	112.033	335.393	112.033	335.393	112.034	335.393	125.347	335.463	107.859	335.393	107.576	335.463	107.94	335.393	107.566	335.463	104.83	335.393	106.752	335.463	107.945
335.875	109.97	335.806	117.037	335.875	110.045	335.806	117.043	335.806	114.403	335.806	114.402	335.806	114.401	335.806	114.402	335.806	127.49	335.875	110.442	335.806	109.97	335.875	110.521	335.806	109.956	335.875	107.47	335.806	109.169	335.875	110.525
336.287	107.16	336.218	114.12	336.287	107.236	336.218	114.126	336.218	111.397	336.218	111.394	336.218	111.395	336.218	111.396	336.218	124.665	336.287	107.619	336.218	106.948	336.287	107.699	336.218	106.937	336.287	104.62	336.218	106.127	336.287	107.704
336.699	109.814	336.63	116.947	336.699	109.89	336.63	116.954	336.63	114.268	336.63	114.266	336.63	114.266	336.63	114.267	336.63	127.458	336.699	110.272	336.63	109.82	336.699	110.353	336.63	109.808	336.699	107.258	336.63	109.009	336.699	110.358
337.111	107.464	337.042	114.052	337.111	107.54	337.042	114.059	337.042	111.37	337.042	111.368	337.042	111.368	337.042	111.369	337.042	124.546	337.111	107.933	337.042	106.934	337.111	108.012	337.042	106.922	337.111	104.963	337.042	106.123	337.111	108.017
337.523	109.314	337.454	116.487	337.523	109.391	337.454	116.493	337.454	113.756	337.454	113.754	337.454	113.754	337.454	113.755	337.454	127.059	337.523	109.76	337.454	109.292	337.523	109.842	337.454	109.282	337.523	106.702	337.454	108.47	337.523	109.847
337.935	108.09	337.866	114.501	337.935	108.166	337.866	114.508	337.866	111.847	337.866	111.846	337.866	111.846	337.866	111.847	337.866	124.963	337.935	108.562	337.866	107.419	337.935	108.641	337.866	107.405	337.935	105.598	337.866	106.614	337.935	108.646
338.347	108.515	338.278	115.664	338.347	108.592	338.278	115.67	338.278	112.876	338.278	112.874	338.278	112.873	338.278	112.875	338.278	126.3	338.347	108.947	338.278	108.395	338.347	109.03	338.278	108.387	338.347	105.846	338.278	107.56	338.347	109.035
338.76	108.711	338.69	115.114	338.76	108.787	338.69	115.122	338.69	112.46	338.69	112.458	338.69	112.458	338.69	112.459	338.69	125.582	338.76	109.179	338.69	108.027	338.76	109.259	338.69	108.014	338.76	106.199	338.69	107.222	338.76	109.264
339.172	107.541	339.102	114.544	339.172	107.619	339.102	114.551	339.102	111.701	339.102	111.698	339.102	111.698	339.102	111.699	339.102	125.243	339.172	107.961	339.102	107.206	339.172	108.046	339.102	107.2	339.172	104.826	339.102	106.358	339.172	108.05
339.584	109.121	339.514	115.59	339.584	109.197	339.514	115.596	339.514	112.909	339.514	112.908	339.514	112.907	339.514	112.908	339.514	126.093	339.584	109.58	339.514	108.466	339.584	109.66	339.514	108.454	339.584	106.569	339.514	107.655	339.584	109.665
339.996	106.644	339.926	113.312	339.996	106.721	339.926	113.318	339.926	110.43	339.926	110.428	339.926	110.427	339.926	110.428	339.926	124.047	339.996	107.06	339.926	105.928	339.996	107.144	339.926	105.924	339.996	103.918	339.926	105.073	339.996	107.149
340.408	109.21	340.338	115.758	340.408	109.287	340.338	115.764	340.338	113.034	340.338	113.033	340.338	113.033	340.338	113.033	340.338	126.315	340.408	109.658	340.338	108.576	340.408	109.739	340.338	108.566	340.408	106.606	340.338	107.756	340.408	109.744
340.82	106.187	340.75	112.368	340.82	106.264	340.75	112.375	340.75	109.498	340.75	109.496	340.75	109.495	340.75	109.496	340.75	123.081	340.82	106.61	340.75	105.007	340.82	106.694	340.75	105.003	340.82	103.497	340.75	104.155	340.82	106.699
341.232	108.933	341.162	115.535	341.232	109.01	341.162	115.542	341.162	112.757	341.162	112.755	341.162	112.755	341.162	112.756	341.162	126.161	341.232	109.366	341.162	108.28	341.232	109.449	341.162	108.272	341.232	106.266	341.162	107.447	341.232	109.454
341.644	106.349	341.574	112.144	341.644	106.426	341.574	112.15	341.574	109.338	341.574	109.337	341.574	109.337	341.574	109.337	341.574	122.776	341.644	106.785	341.574	104.874	341.644	106.867	341.574	104.866	341.644	103.714	341.574	104.037	341.644	106.872
342.056	108.275	341.986	114.883	342.056	108.353	341.986	114.889	341.986	112.035	341.986	112.033	341.986	112.033	341.986	112.034	341.986	125.589	342.056	108.691	341.986	107.536	342.056	108.776	341.986	107.531	342.056	105.534	341.986	106.688	342.056	108.781
342.469	106.905	342.398	112.595	342.469	106.981	342.398	112.602	342.398	109.848	342.398	109.846	342.398	109.846	342.398	109.847	342.398	123.16	342.469	107.349	342.398	105.398	342.469	107.43	342.398	105.389	342.469	104.297	342.398	104.574	342.469	107.435
342.881	107.252	342.81	113.77	342.881	107.33	342.81	113.777	342.81	110.836	342.81	110.834	342.81	110.833	342.81	110.834	342.81	124.574	342.881	107.648	342.81	106.311	342.881	107.734	342.81	106.31	342.881	104.428	342.81	105.443	342.881	107.739
343.293	107.488	343.222	113.26	343.293	107.564	343.222	113.266	343.222	110.524	343.222	110.523	343.222	110.522	343.222	110.523	343.222	123.815	343.293	107.93	343.222	106.075	343.293	108.011	343.222	106.064	343.293	104.868	343.222	105.252	343.293	108.016
343.705	105.952	343.634	112.209	343.705	106.033	343.634	112.216	343.634	109.171	343.634	109.17	343.634	109.17	343.634	109.171	343.634	123.12	343.705	106.329	343.634	104.62	343.705	106.418	343.634	104.621	343.705	103.048	343.634	103.729	343.705	106.423
344.117	107.84	344.046	113.738	344.117	107.918	344.046	113.745	344.046	110.975	344.046	110.973	344.046	110.973	344.046	110.974	344.046	124.331	344.117	108.273	344.046	106.513	344.117	108.356	344.046	106.504	344.117	105.178	344.046	105.684	344.117	108.361
344.529	104.676	344.458	110.394	344.529	104.756	344.458	110.401	344.458	107.272	344.458	107.269	344.458	107.269	344.458	107.27	344.458	121.387	344.529	105.041	344.458	102.706	344.529	105.131	344.458	102.712	344.529	101.733	344.458	101.796	344.529	105.135
344.941	107.83	344.87	113.823	344.941	107.907	344.87	113.83	344.87	111.004	344.87	111.002	344.87	111.002	344.87	111.003	344.87	124.485	344.941	108.248	344.87	106.522	344.941	108.333	344.87	106.516	344.941	105.104	344.87	105.68	344.941	108.338
345.353	103.953	345.282	108.983	345.353	104.033	345.282	108.988	345.282	105.905	345.282	105.903	345.282	105.904	345.282	105.902	345.282	119.92	345.353	104.329	345.282	101.376	345.353	104.416	345.282	101.379	345.353	101.069	345.282	100.482	345.353	104.421
345.765	107.39	345.694	113.416	345.765	107.469	345.694	113.422	345.694	110.516	345.694	110.514	345.694	110.514	345.694	110.515	345.694	124.173	345.765	107.789	345.694	106.008	345.765	107.876	345.694	106.004	345.765	104.58	345.694	105.148	345.765	107.88
346.178	104.124	346.106	108.875	346.178	104.202	346.106	108.882	346.106	106.002	346.106	105.999	346.106	105.999	346.106	106	346.106	119.585	346.178	104.525	346.106	101.545	346.178	104.611	346.106	101.541	346.178	101.355	346.106	100.7	346.178	104.615
346.59	106.465	346.518	112.426	346.59	106.545	346.518	112.433	346.518	109.415	346.518	109.412	346.518	109.412	346.518	109.413	346.518	123.31	346.59	106.839	346.518	104.87	346.59	106.929	346.518	104.872	346.59	103.545	346.518	103.985	346.59	106.933
347.002	104.848	346.93	109.841	347.002	104.925	346.93	109.847	346.93	107.108	346.93	107.105	346.93	107.105	346.93	107.106	346.93	120.382	347.002	105.266	346.93	102.685	347.002	105.35	346.93	102.676	347.002	102.146	346.93	101.869	347.002	105.355
347.414	105.012	347.342	110.742	347.414	105.093	347.342	110.747	347.342	107.567	347.342	107.565	347.342	107.563	347.342	107.564	347.342	121.799	347.414	105.353	347.342	102.973	347.414	105.444	347.342	102.983	347.414	101.946	347.342	102.05	347.414	105.449
347.826	105.565	347.754	110.898	347.826	105.642	347.754	110.905	347.754	108.182	347.754	108.179	347.754	108.181	347.754	108.181	347.754	121.42	347.826	105.983	347.754	103.756	347.826	106.067	347.754	103.745	347.826	102.857	347.754	102.941	347.826	106.072
348.238	103.056	348.166	108.225	348.238	103.14	348.166	108.231	348.166	104.817	348.166	104.815	348.166	104.814	348.166	104.814	348.166	119.516	348.238	103.355	348.166	100.165	348.238	103.451	348.166	100.183	348.238	99.813	348.166	99.1873	348.238	103.455
348.65	105.943	348.578	111.517	348.65	106.022	348.578	111.524	348.578	108.751	348.578	108.748	348.578	108.749	348.578	108.75	348.578	122.1	348.65	106.351	348.578	104.303	348.65	106.436	348.578	104.294	348.65	103.181	348.578	103.476	348.65	106.441
349.062	100.973	348.991	105.083	349.062	101.057	348.991	105.089	348.991	101.536	348.991	101.532	348.991	101.533	348.991	101.532	348.991	116.535	349.062	101.241	348.991	96.9034	349.062	101.34	348.991	96.9269	349.062	97.6322	348.991	95.9144	349.062	101.344
349.475	105.835	349.403	111.522	349.475	105.915	349.403	111.529	349.403	108.667	349.403	108.665	349.403	108.665	349.403	108.666	349.403	122.213	349.475	106.223	349.403	104.189	349.475	106.31	349.403	104.183	349.475	102.983	349.403	103.341	349.475	106.315
349.887	99.9836	349.815	103.711	349.887	100.064	349.815	103.717	349.815	100.9	349.815	100.895	349.815	100.896	349.815	100.896	349.815	114.481	349.887	100.3	349.815	96.5643	349.887	100.393	349.815	96.5544	349.887	96.9122	349.815	95.7737	349.887	100.398
350.299	105.153	350.227	110.816	350.299	105.233	350.227	110.822	350.227	107.832	350.227	107.829	350.227	107.829	350.227	107.83	350.227	121.653	350.299	105.51	350.227	103.313	350.299	105.601	350.227	103.314	350.299	102.167	350.227	102.437	350.299	105.605
350.711	100.841	350.639	105.877	350.711	100.919	350.639	105.883	350.639	103.593	350.639	103.59	350.639	103.592	350.639	103.591	350.639	115.891	350.711	101.244	350.639	99.3508	350.711	101.328	350.639	99.3215	350.711	98.1398	350.639	98.6411	350.711	101.332
351.123	103.768	351.051	109.229	351.123	103.852	351.051	109.236	351.051	106.052	351.051	106.05	351.051	106.051	351.051	106.05	351.051	120.277	351.123	104.082	351.051	101.48	351.123	104.177	351.051	101.487	351.123	100.587	351.051	100.56	351.123	104.182
351.535	102.334	351.463	108.344	351.535	102.408	351.463	108.35	351.463	106.039	351.463	106.036	351.463	106.036	351.463	106.037	351.463	118.345	351.535	102.769	351.463	101.753	351.535	102.85	351.463	101.727	351.535	99.7429	351.463	101.028	351.535	102.854
351.947	101.486	351.875	106.429	351.947	101.572	351.875	106.436	351.875	102.947	351.875	102.943	351.875	102.944	351.875	102.944	351.875	117.797	351.947	101.727	351.875	98.3035	351.947	101.83	351.875	98.3243	351.947	97.9862	351.875	97.3176	351.947	101.834
352.359	103.452	352.287	109.917	352.359	103.527	352.287	109.923	352.287	107.498	352.287	107.496	352.287	107.495	352.287	107.497	352.287	120.063	352.359	103.883	352.287	103.166	352.359	103.965	352.287	103.145	352.359	100.822	352.287	102.415	352.359	103.969
352.771	98.0376	352.699	101.98	352.771	98.1267	352.699	101.984	352.699	98.3201	352.699	98.3147	352.699	98.3158	352.699	98.3127	352.699	113.676	352.771	98.1616	352.699	93.7722	352.771	98.2729	352.699	93.7939	352.771	94.0479	352.699	92.8176	352.771	98.2775
353.184	103.921	353.111	110.598	353.184	103.999	353.111	110.605	353.111	108.062	353.111	108.06	353.111	108.062	353.111	108.062	353.111	120.895	353.184	104.331	353.111	103.693	353.184	104.416	353.111	103.674	353.184	101.189	353.111	102.917	353.184	104.421
353.596	94.4261	353.523	100.075	353.596	94.5102	353.523	100.08	353.523	98.469	353.523	98.4641	353.523	98.468	353.523	98.4647	353.523	109.616	353.596	94.583	353.523	94.5265	353.596	94.6857	353.523	94.4688	353.596	90.9314	353.523	93.9888	353.596	94.6902
354.008	103.67	353.935	110.443	354.008	103.75	353.935	110.45	353.935	107.789	353.935	107.786	353.935	107.787	353.935	107.788	353.935	120.888	354.008	104.046	353.935	103.385	354.008	104.135	353.935	103.371	354.008	100.791	353.935	102.584	354.008	104.14
354.42	96.0292	354.347	104.845	354.42	96.0934	354.347	104.85	354.347	103.312	354.347	103.31	354.347	103.31	354.347	103.31	354.347	113.696	354.42	96.5844	354.347	99.2395	354.42	96.6481	354.347	99.1875	354.42	94.1412	354.347	98.6569	354.42	96.6526
354.832	102.588	354.759	109.4	354.832	102.668	354.759	109.406	354.759	106.617	354.759	106.615	354.759	106.614	354.759	106.615	354.759	119.999	354.832	102.915	354.759	102.183	354.832	103.008	354.759	102.175	354.832	99.4966	354.759	101.356	354.832	103.012
355.244	99.5721	355.171	108.505	355.244	99.6388	355.171	108.511	355.171	106.621	355.171	106.62	355.171	106.621	355.171	106.621	355.171	117.902	355.244	100.167	355.171	102.43	355.244	100.23	355.171	102.388	355.244	97.6841	355.171	101.78	355.244	100.235
355.656	100.419	355.583	107.311	355.656	100.505	355.583	107.317	355.583	104.409	355.583	104.408	355.583	104.409	355.583	104.409	355.583	118.057	355.656	100.669	355.583	99.9679	355.656	100.769	355.583	99.9621	355.656	96.9893	355.583	99.124	355.656	100.774
356.068	101.948	355.995	110.72	356.068	102.018	355.995	110.727	355.995	108.616	355.995	108.614	355.995	108.615	355.995	108.615	355.995	120.45	356.068	102.502	355.995	104.355	356.068	102.571	355.995	104.321	356.068	99.8542	355.995	103.663	356.068	102.576
356.481	96.5611	356.407	104.132	356.481	96.6535	356.407	104.139	356.407	101.397	356.407	101.394	356.407	101.395	356.407	101.395	356.407	114.785	356.481	96.6658	356.407	97.0723	356.481	96.7801	356.407	97.0583	356.481	92.5652	356.407	96.2914	356.481	96.7846
356.893	103.231	356.819	111.934	356.893	103.303	356.819	111.941	356.819	109.678	356.819	109.677	356.819	109.677	356.819	109.678	356.819	121.874	356.893	103.746	356.819	105.373	356.893	103.819	356.819	105.344	356.893	100.958	356.819	104.651	356.893	103.824
357.305	91.1668	357.231	102.626	357.305	91.2468	357.231	102.632	357.231	100.976	357.231	100.973	357.231	100.976	357.231	100.974	357.231	111.834	357.305	91.4175	357.231	96.937	357.305	91.5058	357.231	96.8849	357.305	88.6004	357.231	96.3548	357.305	91.5102
357.717	103.611	357.643	112.35	357.717	103.685	357.643	112.356	357.643	109.981	357.643	109.979	357.643	109.98	357.643	109.98	357.643	122.441	357.717	104.088	357.643	105.644	357.717	104.165	357.643	105.619	357.717	101.176	357.643	104.9	357.717	104.17
358.129	94.6653	358.055	106.052	358.129	94.7169	358.055	106.059	358.055	104.502	358.055	104.501	358.055	104.501	358.055	104.502	358.055	114.916	358.129	95.5457	358.055	100.404	358.129	95.5791	358.055	100.351	358.129	93.9413	358.055	99.8138	358.129	95.5837
358.541	103.144	358.467	112.048	358.541	103.22	358.467	112.055	358.467	109.587	358.467	109.586	358.467	109.585	358.467	109.587	358.467	122.255	358.541	103.583	358.467	105.226	358.541	103.664	358.467	105.206	358.541	100.55	358.467	104.464	358.541	103.669
358.953	99.6999	358.879	109.612	358.953	99.7604	358.879	109.619	358.879	107.759	358.879	107.757	358.879	107.758	358.879	107.759	358.879	118.985	358.953	100.442	358.879	103.559	358.953	100.493	358.879	103.516	358.953	98.3348	358.879	102.913	358.953	100.498
359.365	101.74	359.291	111.025	359.365	101.818	359.291	111.033	359.291	108.498	359.291	108.496	359.291	108.497	359.291	108.497	359.291	121.314	359.365	102.133	359.291	104.126	359.365	102.22	359.291	104.107	359.365	98.9727	359.291	103.351	359.365	102.224
359.777	102.732	359.703	112.073	359.777	102.798	359.703	112.079	359.703	110.01	359.703	110.008	359.703	110.009	359.703	110.01	359.703	121.768	359.777	103.382	359.703	105.747	359.777	103.442	359.703	105.711	359.777	100.988	359.703	105.061	359.777	103.447
360.19	99.189	360.115	109.324	360.19	99.2669	360.115	109.33	360.115	106.799	360.115	106.797	360.115	106.796	360.115	106.798	360.115	119.608	360.19	99.5388	360.115	102.442	360.19	99.6275	360.115	102.425	360.19	96.2967	360.115	101.671	360.19	99.6321
360.602	104.509	360.527	113.64	360.602	104.578	360.527	113.647	360.527	111.436	360.527	111.435	360.527	111.436	360.527	111.436	360.527	123.535	360.602	105.104	360.527	107.132	360.602	105.17	360.527	107.101	360.602	102.535	360.527	106.419	360.602	105.175
361.014	95.8194	360.939	107.507	361.014	95.8928	360.939	107.514	360.939	105.204	360.939	105.2	360.939	105.203	360.939	105.202	360.939	117.514	361.014	96.2602	360.939	100.929	361.014	96.3364	360.939	100.902	361.014	93.4916	360.939	100.206	361.014	96.341
361.426	105.409	361.351	114.504	361.426	105.479	361.351	114.51	361.351	112.195	361.351	112.194	361.351	112.194	361.351	112.195	361.351	124.538	361.426	105.963	361.351	107.861	361.426	106.034	361.351	107.834	361.426	103.269	361.351	107.127	361.426	106.038
361.838	96.2084	361.763	107.505	361.838	96.2684	361.763	107.512	361.763	105.558	361.763	105.557	361.763	105.559	361.763	105.559	361.763	116.994	361.838	96.9913	361.763	101.367	361.838	97.0354	361.763	101.325	361.838	95.0924	361.763	100.708	361.838	97.04
362.25	105.574	362.176	114.756	362.25	105.646	362.176	114.763	362.176	112.364	362.176	112.363	362.176	112.363	362.176	112.364	362.176	124.898	362.25	106.096	362.176	108.007	362.25	106.17	362.176	107.983	362.25	103.303	362.176	107.256	362.25	106.174
362.662	100.276	362.588	109.786	362.662	100.336	362.588	109.793	362.588	107.849	362.588	107.848	362.588	107.848	362.588	107.849	362.588	119.277	362.662	101.022	362.588	103.63	362.662	101.072	362.588	103.591	362.662	98.9077	362.588	102.969	362.662	101.077
363.074	105.039	363	114.433	363.074	105.113	363	114.439	363	111.97	363	111.969	363	111.969	363	111.97	363	124.66	363.074	105.533	363	107.595	363.074	105.609	363	107.574	363.074	102.655	363	106.83	363.074	105.613
363.487	103.527	363.412	112.316	363.487	103.591	363.412	112.323	363.412	110.239	363.412	110.237	363.412	110.237	363.412	110.238	363.412	122.036	363.487	104.192	363.412	105.969	363.487	104.251	363.412	105.934	363.487	101.824	363.412	105.28	363.487	104.256
363.899	103.782	363.824	113.544	363.899	103.857	363.824	113.55	363.824	111.027	363.824	111.025	363.824	111.025	363.824	111.025	363.824	123.835	363.899	104.25	363.824	106.64	363.899	104.329	363.824	106.622	363.899	101.309	363.824	105.864	363.899	104.333
364.311	105.695	364.236	114.268	364.311	105.763	364.236	114.275	364.236	112.063	364.236	112.062	364.236	112.062	364.236	112.063	364.236	124.173	364.311	106.307	364.236	107.754	364.311	106.372	364.236	107.723	364.311	103.774	364.236	107.04	364.311	106.377
364.723	101.846	364.648	112.152	364.723	101.92	364.648	112.159	364.648	109.617	364.648	109.615	364.648	109.615	364.648	109.616	364.648	122.455	364.723	102.31	364.648	105.234	364.723	102.389	364.648	105.215	364.723	99.3839	364.648	104.455	364.723	102.393
365.135	107.041	365.06	115.588	365.135	107.112	365.06	115.594	365.06	113.284	365.06	113.283	365.06	113.283	365.06	113.284	365.06	125.63	365.135	107.616	365.06	108.945	365.135	107.684	365.06	108.918	365.135	104.967	365.06	108.212	365.135	107.689
365.547	100.008	365.472	110.644	365.547	100.078	365.472	110.651	365.472	108.195	365.472	108.192	365.472	108.193	365.472	108.193	365.472	120.835	365.547	100.543	365.472	103.846	365.547	100.614	365.472	103.826	365.547	97.8785	365.472	103.087	365.547	100.618
365.959	107.725	365.884	116.339	365.959	107.797	365.884	116.345	365.884	113.955	365.884	113.953	365.884	113.953	365.884	113.954	365.884	126.486	365.959	108.271	365.884	109.592	365.959	108.343	365.884	109.568	365.959	105.532	365.884	108.843	365.959	108.347
366.371	100.52	366.296	110.176	366.371	100.584	366.296	110.183	366.296	107.926	366.296	107.923	366.296	107.924	366.296	107.924	366.296	120.104	366.371	101.17	366.296	103.633	366.371	101.23	366.296	103.605	366.371	98.8152	366.296	102.913	366.371	101.234
366.783	107.818	366.708	116.563	366.783	107.89	366.708	116.57	366.708	114.11	366.708	114.109	366.708	114.109	366.708	114.11	366.708	126.799	366.783	108.338	366.708	109.728	366.783	108.412	366.708	109.707	366.783	105.523	366.708	108.965	366.783	108.417
367.196	103.095	367.12	111.49	367.196	103.161	367.12	111.497	367.12	109.328	367.12	109.326	367.12	109.327	367.12	109.328	367.12	121.306	367.196	103.747	367.12	105.046	367.196	103.808	367.12	105.014	367.196	101.35	367.12	104.342	367.196	103.812
367.608	107.336	367.532	116.281	367.608	107.409	367.532	116.287	367.532	113.764	367.532	113.763	367.532	113.762	367.532	113.764	367.532	126.592	367.608	107.833	367.532	109.365	367.608	107.91	367.532	109.346	367.608	104.951	367.532	108.588	367.608	107.915
368.02	105.602	367.944	113.512	368.02	105.67	367.944	113.518	367.944	111.297	367.944	111.295	367.944	111.296	367.944	111.296	367.944	123.422	368.02	106.216	367.944	106.989	368.02	106.28	367.944	106.958	368.02	103.688	367.944	106.273	368.02	106.285
368.432	106.273	368.356	115.49	368.432	106.349	368.356	115.496	368.356	112.914	368.356	112.913	368.356	112.913	368.356	112.914	368.356	125.867	368.432	106.752	368.356	108.501	368.432	106.83	368.356	108.484	368.432	103.813	368.356	107.713	368.432	106.835
368.844	107.454	368.768	115.286	368.844	107.524	368.768	115.293	368.768	112.986	368.768	112.985	368.768	112.985	368.768	112.986	368.768	125.321	368.844	108.033	368.768	108.649	368.844	108.102	368.768	108.622	368.844	105.395	368.768	107.917	368.844	108.106
369.256	104.685	369.18	114.21	369.256	104.76	369.18	114.216	369.18	111.59	369.18	111.588	369.18	111.588	369.18	111.589	369.18	124.634	369.256	105.152	369.18	107.168	369.256	105.231	369.18	107.154	369.256	102.192	369.18	106.37	369.256	105.235
369.668	108.667	369.592	116.564	369.668	108.739	369.592	116.571	369.592	114.186	369.592	114.185	369.592	114.185	369.592	114.186	369.592	126.708	369.668	109.219	369.592	109.824	369.668	109.29	369.592	109.8	369.668	106.494	369.592	109.076	369.668	109.295
370.08	103.027	370.004	112.635	370.08	103.1	370.004	112.641	370.004	110.02	370.004	110.018	370.004	110.018	370.004	110.018	370.004	123.043	370.08	103.516	370.004	105.608	370.08	103.592	370.004	105.594	370.08	100.65	370.004	104.812	370.08	103.596
370.492	109.312	370.416	117.331	370.492	109.385	370.416	117.338	370.416	114.884	370.416	114.883	370.416	114.883	370.416	114.884	370.416	127.566	370.492	109.841	370.416	110.501	370.492	109.915	370.416	110.479	370.492	107.043	370.416	109.739	370.492	109.919
370.905	102.667	370.828	111.503	370.905	102.737	370.828	111.509	370.828	109.003	370.828	109.002	370.828	109.001	370.828	109.002	370.828	121.758	370.905	103.226	370.828	104.633	370.905	103.294	370.828	104.614	370.905	100.573	370.828	103.863	370.905	103.299
371.317	109.433	371.24	117.608	371.317	109.507	371.24	117.615	371.24	115.097	371.24	115.096	371.24	115.096	371.24	115.097	371.24	127.924	371.317	109.941	371.24	110.695	371.317	110.017	371.24	110.675	371.317	107.078	371.24	109.919	371.317	110.022
371.729	104.252	371.652	111.907	371.729	104.321	371.652	111.914	371.652	109.559	371.652	109.557	371.652	109.557	371.652	109.558	371.652	121.973	371.729	104.844	371.652	105.227	371.729	104.91	371.652	105.202	371.729	102.267	371.652	104.486	371.729	104.915
372.141	109.036	372.064	117.398	372.141	109.111	372.064	117.405	372.064	114.825	372.064	114.824	372.064	114.824	372.064	114.825	372.064	127.79	372.141	109.524	372.064	110.405	372.141	109.601	372.064	110.388	372.141	106.598	372.064	109.616	372.141	109.606
372.553	106.391	372.476	113.547	372.553	106.462	372.476	113.554	372.476	111.225	372.476	111.224	372.476	111.224	372.476	111.225	372.476	123.592	372.553	106.971	372.476	106.891	372.553	107.039	372.476	106.864	372.553	104.337	372.476	106.154	372.553	107.044
372.965	108.11	372.888	116.693	372.965	108.186	372.888	116.7	372.888	114.056	372.888	114.055	372.888	114.054	372.888	114.056	372.888	127.159	372.965	108.578	372.888	109.618	372.965	108.657	372.888	109.604	372.965	105.59	372.888	108.816	372.965	108.662
373.377	108.169	373.3	115.301	373.377	108.24	373.3	115.308	373.3	112.931	373.3	112.929	373.3	112.929	373.3	112.93	373.3	125.426	373.377	108.724	373.3	108.574	373.377	108.795	373.3	108.55	373.377	106.012	373.3	107.827	373.377	108.8
373.789	106.66	373.712	115.472	373.789	106.736	373.712	115.478	373.712	112.769	373.712	112.767	373.712	112.767	373.712	112.768	373.712	126.01	373.789	107.108	373.712	108.314	373.789	107.189	373.712	108.303	373.789	104.069	373.712	107.498	373.789	107.194
374.202	109.406	374.124	116.665	374.202	109.478	374.124	116.672	374.124	114.23	374.124	114.229	374.124	114.229	374.124	114.23	374.124	126.882	374.202	109.939	374.124	109.851	374.202	110.012	374.124	109.829	374.202	107.155	374.124	109.092	374.202	110.017
374.614	104.882	374.536	113.778	374.614	104.958	374.536	113.785	374.536	111.022	374.536	111.02	374.536	111.02	374.536	111.021	374.536	124.369	374.614	105.325	374.536	106.558	374.614	105.406	374.536	106.549	374.614	102.283	374.536	105.73	374.614	105.411
375.026	110.114	374.948	117.539	375.026	110.187	374.948	117.545	374.948	115.039	374.948	115.038	374.948	115.038	374.948	115.039	374.948	127.841	375.026	110.627	374.948	110.639	375.026	110.702	374.948	110.62	375.026	107.777	374.948	109.867	375.026	110.707
375.438	103.656	375.361	112.001	375.438	103.729	375.361	112.008	375.361	109.266	375.361	109.264	375.361	109.264	375.361	109.265	375.361	122.552	375.438	104.135	375.361	104.82	375.438	104.213	375.361	104.811	375.438	101.226	375.361	103.998	375.438	104.217
375.85	110.318	375.773	117.919	375.85	110.392	375.773	117.926	375.773	115.358	375.773	115.356	375.773	115.356	375.773	115.357	375.773	128.303	375.85	110.811	375.773	110.938	375.85	110.889	375.773	110.921	375.85	107.901	375.773	110.152	375.85	110.893
376.262	104.253	376.185	111.326	376.262	104.324	376.185	111.332	376.185	108.759	376.185	108.757	376.185	108.757	376.185	108.757	376.185	121.667	376.262	104.789	376.185	104.37	376.262	104.86	376.185	104.354	376.262	102.045	376.185	103.585	376.262	104.865
376.674	110.024	376.597	117.812	376.674	110.099	376.597	117.818	376.597	115.186	376.597	115.184	376.597	115.184	376.597	115.186	376.597	128.274	376.674	110.498	376.597	110.747	376.674	110.577	376.597	110.732	376.674	107.525	376.597	109.947	376.674	110.582
377.086	106.11	377.009	112.484	377.086	106.182	377.009	112.491	377.009	110.052	377.009	110.051	377.009	110.052	377.009	110.052	377.009	122.661	377.086	106.659	377.009	105.694	377.086	106.73	377.009	105.672	377.086	103.938	377.009	104.936	377.086	106.735
377.498	109.209	377.421	117.196	377.498	109.285	377.421	117.203	377.421	114.5	377.421	114.499	377.421	114.499	377.421	114.5	377.421	127.742	377.498	109.662	377.421	110.041	377.498	109.744	377.421	110.028	377.498	106.623	377.421	109.226	377.498	109.749
377.911	107.953	377.833	114.333	377.911	108.025	377.833	114.339	377.833	111.903	377.833	111.901	377.833	111.901	377.833	111.902	377.833	124.525	377.911	108.488	377.833	107.534	377.911	108.561	377.833	107.512	377.911	105.717	377.833	106.775	377.911	108.566
378.323	107.842	378.245	116.03	378.323	107.919	378.245	116.036	378.245	113.252	378.245	113.25	378.245	113.25	378.245	113.251	378.245	126.669	378.323	108.271	378.245	108.768	378.323	108.355	378.245	108.76	378.323	105.158	378.245	107.935	378.323	108.359
378.735	109.323	378.657	115.912	378.735	109.396	378.657	115.918	378.657	113.43	378.657	113.428	378.657	113.428	378.657	113.429	378.657	126.181	378.735	109.84	378.657	109.04	378.735	109.915	378.657	109.02	378.735	107.007	378.657	108.27	378.735	109.919
379.147	105.938	379.069	114.247	379.147	106.016	379.069	114.254	379.069	111.37	379.069	111.368	379.069	111.368	379.069	111.369	379.069	124.992	379.147	106.343	379.069	106.86	379.147	106.429	379.069	106.856	379.147	103.161	379.069	106.005	379.147	106.434
379.559	110.166	379.481	116.981	379.559	110.24	379.481	116.988	379.481	114.437	379.481	114.436	379.481	114.436	379.481	114.437	379.481	127.336	379.559	110.665	379.481	110.025	379.559	110.742	379.481	110.008	379.559	107.771	379.481	109.243	379.559	110.747
379.971	103.923	379.893	111.905	379.971	104.001	379.893	111.912	379.893	108.934	379.893	108.932	379.893	108.931	379.893	108.933	379.893	122.739	379.971	104.327	379.893	104.406	379.971	104.412	379.893	104.406	379.971	101.16	379.893	103.531	379.971	104.417
380.383	110.497	380.305	117.522	380.383	110.573	380.305	117.528	380.305	114.914	380.305	114.912	380.305	114.912	380.305	114.913	380.305	127.961	380.383	110.978	380.305	110.481	380.383	111.057	380.305	110.465	380.383	108.023	380.305	109.685	380.383	111.061
380.795	103.271	380.717	109.847	380.795	103.347	380.717	109.854	380.717	106.951	380.717	106.949	380.717	106.951	380.717	106.95	380.717	120.58	380.795	103.733	380.717	102.473	380.795	103.812	380.717	102.468	380.795	100.77	380.717	101.619	380.795	103.817
381.207	110.323	381.129	117.542	381.207	110.399	381.129	117.549	381.129	114.866	381.129	114.864	381.129	114.864	381.129	114.865	381.129	128.068	381.207	110.784	381.129	110.41	381.207	110.865	381.129	110.398	381.207	107.766	381.129	109.6	381.207	110.869
381.62	104.739	381.541	110.118	381.62	104.812	381.541	110.125	381.541	107.53	381.541	107.528	381.541	107.528	381.541	107.53	381.541	120.481	381.62	105.253	381.541	103.144	381.62	105.328	381.541	103.129	381.62	102.438	381.541	102.357	381.62	105.332
382.032	109.618	381.953	117.026	382.032	109.695	381.953	117.032	381.953	114.271	381.953	114.269	381.953	114.269	381.953	114.27	381.953	127.646	382.032	110.057	381.953	109.79	382.032	110.14	381.953	109.781	382.032	106.967	381.953	108.963	382.032	110.145
382.444	106.783	382.365	112.233	382.444	106.855	382.365	112.24	382.365	109.758	382.365	109.756	382.365	109.756	382.365	109.757	382.365	122.465	382.444	107.3	382.365	105.388	382.444	107.375	382.365	105.367	382.444	104.48	382.365	104.621	382.444	107.379
382.856	108.324	382.777	115.913	382.856	108.402	382.777	115.92	382.777	113.061	382.777	113.059	382.777	113.059	382.777	113.06	382.777	126.648	382.856	108.735	382.777	108.55	382.856	108.821	382.777	108.545	382.856	105.555	382.777	107.701	382.856	108.825
383.268	108.42	383.189	114.258	383.268	108.494	383.189	114.265	383.189	111.749	383.189	111.748	383.189	111.748	383.189	111.749	383.189	124.548	383.268	108.924	383.189	107.358	383.268	109	383.189	107.339	383.268	106.052	383.189	106.584	383.268	109.005
383.68	106.34	383.601	114.073	383.68	106.421	383.601	114.08	383.601	111.084	383.601	111.083	383.601	111.082	383.601	111.084	383.601	124.959	383.68	106.715	383.601	106.531	383.68	106.805	383.601	106.531	383.68	103.418	383.601	105.651	383.68	106.809
384.092	109.486	384.013	115.663	384.092	109.561	384.013	115.669	384.013	113.088	384.013	113.086	384.013	113.086	384.013	113.087	384.013	126.047	384.092	109.972	384.013	108.671	384.092	110.05	384.013	108.654	384.092	107.038	384.013	107.882	384.092	110.055
384.504	103.679	384.425	111.284	384.504	103.761	384.425	111.291	384.425	108.081	384.425	108.079	384.425	108.078	384.425	108.08	384.425	122.389	384.504	104.01	384.425	103.466	384.504	104.103	384.425	103.475	384.504	100.582	384.425	102.535	384.504	104.108
384.917	109.99	384.837	116.429	384.917	110.066	384.837	116.435	384.837	113.781	384.837	113.779	384.837	113.779	384.837	113.78	384.837	126.91	384.917	110.457	384.837	109.338	384.917	110.537	384.837	109.324	384.917	107.46	384.837	108.534	384.917	110.542
385.329	101.34	385.249	107.503	385.329	101.421	385.249	107.511	385.249	104.041	385.249	104.037	385.249	104.039	385.249	104.039	385.249	118.844	385.329	101.683	385.249	99.3801	385.329	101.775	385.249	99.4009	385.329	98.3446	385.249	98.391	385.329	101.779
385.741	109.952	385.661	116.601	385.741	110.029	385.661	116.607	385.661	113.873	385.661	113.872	385.661	113.871	385.661	113.873	385.661	127.183	385.741	110.4	385.661	109.404	385.741	110.482	385.661	109.393	385.741	107.334	385.661	108.582	385.741	110.486
386.153	101.988	386.073	105.676	386.153	102.062	386.073	105.682	386.073	102.787	386.073	102.783	386.073	102.784	386.073	102.784	386.073	116.436	386.153	102.448	386.073	98.3735	386.153	102.527	386.073	98.3689	386.153	99.5029	386.073	97.5411	386.153	102.532
386.565	109.357	386.485	116.18	386.565	109.436	386.485	116.186	386.485	113.361	386.485	113.359	386.485	113.359	386.485	113.36	386.485	126.874	386.565	109.781	386.485	108.861	386.565	109.865	386.485	108.854	386.565	106.636	386.485	108.019	386.565	109.87
386.977	104.511	386.897	108.712	386.977	104.584	386.897	108.718	386.897	106.301	386.897	106.299	386.897	106.299	386.897	106.3	386.897	118.848	386.977	105.014	386.897	101.978	386.977	105.09	386.897	101.955	386.977	102.168	386.897	101.23	386.977	105.094
387.389	108.129	387.309	115.1	387.389	108.208	387.309	115.107	387.309	112.164	387.309	112.162	387.309	112.162	387.309	112.163	387.309	125.935	387.389	108.521	387.309	107.625	387.389	108.608	387.309	107.623	387.389	105.273	387.309	106.757	387.389	108.613
387.801	106.671	387.721	111.763	387.801	106.744	387.721	111.77	387.721	109.309	387.721	109.307	387.721	109.307	387.721	109.309	387.721	121.966	387.801	107.166	387.721	104.947	387.801	107.243	387.721	104.926	387.801	104.275	387.721	104.184	387.801	107.247
388.213	106.1	388.133	113.192	388.213	106.183	388.133	113.198	388.133	110.08	388.133	110.078	388.133	110.077	388.133	110.079	388.133	124.225	388.213	106.448	388.133	105.481	388.213	106.54	388.133	105.486	388.213	103.046	388.133	104.573	388.213	106.545
388.626	108.087	388.546	113.719	388.626	108.162	388.546	113.726	388.546	111.164	388.546	111.162	388.546	111.162	388.546	111.163	388.546	124.064	388.626	108.563	388.546	106.761	388.626	108.642	388.546	106.744	388.626	105.603	388.546	105.976	388.626	108.647
389.038	102.949	388.958	110.019	389.038	103.033	388.958	110.025	388.958	106.579	388.958	106.576	388.958	106.575	388.958	106.577	388.958	121.4	389.038	103.215	388.958	101.866	389.038	103.315	388.958	101.887	389.038	99.5386	388.958	100.877	389.038	103.32
389.45	108.819	389.37	114.778	389.45	108.896	389.37	114.784	389.37	112.121	389.37	112.119	389.37	112.119	389.37	112.12	389.37	125.256	389.45	109.275	389.37	107.682	389.45	109.356	389.37	107.668	389.45	106.242	389.37	106.876	389.45	109.361
389.862	98.418	389.782	104.294	389.862	98.5083	389.782	104.299	389.782	99.8823	389.782	99.8784	389.782	99.8764	389.782	99.8769	389.782	116.529	389.862	98.5497	389.782	94.8213	389.862	98.6613	389.782	94.8921	389.862	94.4457	389.782	93.5539	389.862	98.6659
390.274	108.932	390.194	115.094	390.274	109.009	390.194	115.1	390.194	112.333	390.194	112.331	390.194	112.331	390.194	112.332	390.194	125.706	390.274	109.363	390.194	107.858	390.274	109.447	390.194	107.849	390.274	106.25	390.194	107.029	390.274	109.452
390.686	96.8485	390.606	95.3141	390.686	96.9263	390.606	95.3188	390.606	92.5815	390.606	92.5762	390.606	92.5833	390.606	92.5774	390.606	107.727	390.686	97.2113	390.606	88.8362	390.686	97.296	390.606	88.771	390.686	94.1111	390.606	88.3821	390.686	97.3006
391.098	108.425	391.018	114.714	391.098	108.505	391.018	114.721	391.018	111.832	391.018	111.831	391.018	111.831	391.018	111.832	391.018	125.473	391.098	108.83	391.018	107.317	391.098	108.917	391.018	107.312	391.098	105.624	391.018	106.461	391.098	108.922
391.51	101.002	391.43	104.725	391.51	101.071	391.43	104.731	391.43	103.03	391.43	103.027	391.43	103.028	391.43	103.028	391.43	113.863	391.51	101.531	391.43	98.921	391.51	101.601	391.43	98.8742	391.51	98.813	391.43	98.313	391.51	101.606
391.923	107.226	391.842	113.576	391.923	107.307	391.842	113.582	391.842	110.537	391.842	110.535	391.842	110.534	391.842	110.536	391.842	124.521	391.923	107.595	391.842	105.966	391.923	107.685	391.842	105.969	391.923	104.265	391.842	105.074	391.923	107.69
392.335	104.245	392.254	109.554	392.335	104.318	392.254	109.561	392.254	107.401	392.254	107.398	392.254	107.4	392.254	107.4	392.254	119.351	392.335	104.756	392.254	103.132	392.335	104.83	392.254	103.099	392.335	101.937	392.254	102.43	392.335	104.835
392.747	105.126	392.666	111.462	392.747	105.21	392.666	111.469	392.666	108.18	392.666	108.178	392.666	108.177	392.666	108.179	392.666	122.684	392.747	105.44	392.666	103.523	392.747	105.536	392.666	103.535	392.747	101.918	392.666	102.573	392.747	105.541
393.159	106.179	393.078	112.038	393.159	106.252	393.078	112.044	393.078	109.645	393.078	109.643	393.078	109.643	393.078	109.644	393.078	122.166	393.159	106.66	393.078	105.296	393.159	106.737	393.078	105.273	393.159	103.728	393.078	104.546	393.159	106.742
393.571	101.572	393.49	107.759	393.571	101.661	393.49	107.765	393.49	103.996	393.49	103.995	393.49	103.992	393.49	103.994	393.49	119.497	393.571	101.778	393.49	99.1518	393.571	101.885	393.49	99.1862	393.571	97.8645	393.49	98.0822	393.571	101.889
393.983	107.171	393.902	113.271	393.983	107.247	393.902	113.278	393.902	110.709	393.902	110.707	393.902	110.708	393.902	110.709	393.902	123.623	393.983	107.622	393.902	106.306	393.983	107.704	393.902	106.289	393.983	104.585	393.902	105.52	393.983	107.708
394.395	94.5637	394.314	100.257	394.395	94.671	394.314	100.263	394.314	95.327	394.314	95.3266	394.314	95.3188	394.314	95.3262	394.314	113.45	394.395	94.3837	394.314	89.9925	394.395	94.5328	394.314	90.0571	394.395	88.8889	394.314	88.7769	394.395	94.5374
394.807	107.399	394.726	113.595	394.807	107.477	394.726	113.602	394.726	110.88	394.726	110.878	394.726	110.878	394.726	110.879	394.726	124.138	394.807	107.82	394.726	106.427	394.807	107.904	394.726	106.416	394.807	104.675	394.726	105.608	394.807	107.909
395.219	86.0732	395.138	97.5045	395.219	86.1091	395.138	97.5131	395.138	98.0162	395.138	98.0162	395.138	98.0184	395.138	98.0196	395.138	103.512	395.219	87.2332	395.138	94.2985	395.219	87.2221	395.138	94.1818	395.219	87.2212	395.138	94.0179	395.219	87.2264
395.632	106.907	395.55	113.089	395.632	106.986	395.55	113.095	395.55	110.203	395.55	110.201	395.55	110.2	395.55	110.201	395.55	123.837	395.632	107.29	395.55	105.695	395.632	107.378	395.55	105.692	395.632	104.02	395.55	104.839	395.632	107.383
396.044	98.0958	395.962	106.31	396.044	98.1565	395.962	106.317	395.962	104.944	395.962	104.944	395.962	104.945	395.962	104.946	395.962	114.929	396.044	98.8377	395.962	100.855	396.044	98.8875	395.962	100.795	396.044	96.7574	395.962	100.292	396.044	98.8921
396.456	105.614	396.374	111.655	396.456	105.696	396.374	111.661	396.374	108.534	396.374	108.532	396.374	108.53	396.374	108.532	396.374	122.668	396.456	105.95	396.374	103.947	396.456	106.044	396.374	103.954	396.456	102.512	396.374	103.036	396.456	106.049
396.868	102.519	396.786	110.259	396.868	102.588	396.786	110.267	396.786	108.336	396.786	108.335	396.786	108.336	396.786	108.337	396.786	119.753	396.868	103.119	396.786	104.108	396.868	103.185	396.786	104.066	396.868	100.575	396.786	103.448	396.868	103.19
397.28	103.258	397.198	108.915	397.28	103.345	397.198	108.921	397.198	105.38	397.198	105.379	397.198	105.377	397.198	105.379	397.198	120.366	397.28	103.521	397.198	100.648	397.28	103.623	397.198	100.673	397.28	99.8141	397.198	99.6342	397.28	103.627
397.692	104.773	397.61	112.346	397.692	104.846	397.61	112.352	397.61	110.144	397.61	110.143	397.61	110.144	397.61	110.144	397.61	122.232	397.692	105.302	397.61	105.841	397.692	105.375	397.61	105.81	397.692	102.528	397.61	105.128	397.692	105.38
398.104	99.0952	398.022	103.709	398.104	99.1884	398.022	103.714	398.022	99.1516	398.022	99.1506	398.022	99.1455	398.022	99.1488	398.022	116.157	398.104	99.2156	398.022	93.9844	398.104	99.3322	398.022	94.059	398.104	94.9794	398.022	92.6863	398.104	99.3368
398.516	105.841	398.434	113.325	398.516	105.916	398.434	113.332	398.434	110.934	398.434	110.932	398.434	110.933	398.434	110.934	398.434	123.463	398.516	106.319	398.434	106.577	398.516	106.398	398.434	106.553	398.516	103.38	398.434	105.827	398.516	106.403
398.928	90.8353	398.846	96.2489	398.928	90.9433	398.846	96.2578	398.846	95.0723	398.846	95.0727	398.846	95.0724	398.846	95.0776	398.846	108.575	398.928	90.9068	398.846	91.0901	398.928	91.0331	398.846	90.9711	398.928	87.2752	398.846	90.8256	398.928	91.038
399.341	106.014	399.258	113.427	399.341	106.091	399.258	113.434	399.258	110.872	399.258	110.87	399.258	110.87	399.258	110.871	399.258	123.773	399.341	106.446	399.258	106.469	399.341	106.529	399.258	106.452	399.341	103.353	399.258	105.685	399.341	106.534
399.753	93.5806	399.67	104.711	399.753	93.6204	399.67	104.718	399.67	103.665	399.67	103.665	399.67	103.666	399.67	103.667	399.67	113.102	399.753	94.8078	399.67	99.6189	399.753	94.8163	399.67	99.5461	399.753	93.8471	399.67	99.1161	399.753	94.8211
400.165	105.342	400.082	112.664	400.165	105.421	400.082	112.67	400.082	109.93	400.082	109.928	400.082	109.928	400.082	109.929	400.082	123.221	400.165	105.722	400.082	105.477	400.165	105.81	400.082	105.467	400.165	102.451	400.082	104.655	400.165	105.815
400.577	100.199	400.494	109.739	400.577	100.257	400.494	109.747	400.494	108.044	400.494	108.043	400.494	108.044	400.494	108.045	400.494	118.975	400.577	101.006	400.494	103.854	400.577	101.053	400.494	103.805	400.577	99.0229	400.494	103.236	400.577	101.058
400.989	103.682	400.906	110.833	400.989	103.765	400.906	110.839	400.906	107.852	400.906	107.849	400.906	107.849	400.906	107.85	400.906	121.671	400.989	103.989	400.906	103.329	400.989	104.085	400.906	103.329	400.989	100.462	400.906	102.452	400.989	104.089
401.401	103.534	401.319	112.529	401.401	103.599	401.319	112.536	401.319	110.527	401.319	110.526	401.319	110.526	401.319	110.528	401.319	122.183	401.401	104.195	401.319	106.262	401.401	104.255	401.319	106.224	401.401	101.805	401.319	105.588	401.401	104.26
401.813	100.553	401.731	107.254	401.813	100.643	401.731	107.262	401.731	103.78	401.731	103.776	401.731	103.776	401.731	103.777	401.731	118.606	401.813	100.727	401.731	99.1174	401.813	100.838	401.731	99.1398	401.813	96.7106	401.731	98.1258	401.813	100.843
402.225	105.324	402.143	114.107	402.225	105.393	402.143	114.114	402.143	111.916	402.143	111.915	402.143	111.915	402.143	111.916	402.143	124.009	402.225	105.907	402.143	107.603	402.225	105.975	402.143	107.571	402.225	103.287	402.143	106.892	402.225	105.98
402.638	94.4021	402.555	98.7236	402.638	94.5062	402.555	98.7268	402.555	92.966	402.555	92.9593	402.555	92.9557	402.555	92.9539	402.555	111.963	402.638	94.2549	402.555	87.7002	402.638	94.4011	402.555	87.8342	402.638	88.9734	402.555	86.1538	402.638	94.4058
403.05	106.109	402.967	114.831	403.05	106.182	402.967	114.838	402.967	112.499	402.967	112.498	402.967	112.498	402.967	112.499	402.967	124.914	403.05	106.638	402.967	108.15	403.05	106.712	402.967	108.123	403.05	103.85	402.967	107.411	403.05	106.716
403.462	90.1473	403.379	97.3662	403.462	90.1906	403.379	97.3725	403.379	97.9901	403.379	97.9903	403.379	97.9914	403.379	97.992	403.379	101.876	403.462	91.389	403.379	94.3021	403.462	91.3992	403.379	94.1869	403.462	90.6767	403.379	94.021	403.462	91.4042
403.874	106.054	403.791	114.818	403.874	106.128	403.791	114.824	403.791	112.362	403.791	112.361	403.791	112.36	403.791	112.362	403.791	125.053	403.874	106.533	403.791	107.979	403.874	106.611	403.791	107.959	403.874	103.592	403.791	107.215	403.874	106.616
404.286	98.7139	404.203	107.44	404.286	98.7677	404.203	107.446	404.203	106.015	404.203	106.015	404.203	106.015	404.203	106.016	404.203	116.279	404.286	99.6292	404.203	101.889	404.286	99.6661	404.203	101.831	404.286	97.9047	404.203	101.319	404.286	99.6709
404.698	105.131	404.615	114.048	404.698	105.208	404.615	114.055	404.615	111.467	404.615	111.465	404.615	111.465	404.615	111.466	404.615	124.433	404.698	105.556	404.615	107.052	404.698	105.639	404.615	107.036	404.698	102.443	404.615	106.262	404.698	105.644
405.11	103.113	405.027	111.741	405.11	103.176	405.027	111.748	405.027	109.856	405.027	109.856	405.027	109.856	405.027	109.858	405.027	121.253	405.11	103.847	405.027	105.617	405.11	103.901	405.027	105.574	405.11	101.64	405.027	104.965	405.11	103.906
405.522	103.093	405.439	112.362	405.522	103.174	405.439	112.369	405.439	109.629	405.439	109.627	405.439	109.628	405.439	109.628	405.439	122.918	405.522	103.439	405.439	105.178	405.522	103.531	405.439	105.168	405.522	100.074	405.439	104.356	405.522	103.535
405.934	105.611	405.851	114.22	405.934	105.678	405.851	114.227	405.851	112.115	405.851	112.114	405.851	112.114	405.851	112.115	405.851	124.03	405.934	106.256	405.851	107.818	405.934	106.319	405.851	107.783	405.934	103.803	405.851	107.124	405.934	106.323
406.347	99.1275	406.263	109.326	406.347	99.2166	406.263	109.333	406.263	106.385	406.263	106.383	406.263	106.384	406.263	106.384	406.263	120.107	406.347	99.3117	406.263	101.895	406.347	99.4189	406.263	101.892	406.347	95.4044	406.263	101.031	406.347	99.4236
406.759	107.012	406.675	115.672	406.759	107.081	406.675	115.678	406.675	113.424	406.675	113.423	406.675	113.423	406.675	113.424	406.675	125.666	406.759	107.602	406.675	109.09	406.759	107.67	406.675	109.06	406.759	104.989	406.675	108.368	406.759	107.675
407.171	88.9619	407.087	104.024	407.171	89.0858	407.087	104.03	407.087	101.037	407.087	101.033	407.087	101.035	407.087	101.033	407.087	114.937	407.171	88.3211	407.087	96.6349	407.171	88.51	407.087	96.6309	407.171	81.7965	407.087	95.7967	407.171	88.5143
407.583	107.607	407.499	116.377	407.583	107.678	407.499	116.384	407.499	114.02	407.499	114.019	407.499	114.019	407.499	114.02	407.499	126.507	407.583	108.155	407.499	109.657	407.583	108.227	407.499	109.631	407.583	105.417	407.499	108.913	407.583	108.232
407.995	92.5084	407.911	102.139	407.995	92.5414	407.911	102.146	407.911	101.007	407.911	101.005	407.911	101.009	407.911	101.006	407.911	110.35	407.995	93.8174	407.911	97.0434	407.995	93.8168	407.911	96.9752	407.995	93.0568	407.911	96.5297	407.995	93.8217
408.407	107.487	408.323	116.439	408.407	107.56	408.323	116.445	408.323	113.987	408.323	113.985	408.323	113.985	408.323	113.986	408.323	126.686	408.407	107.998	408.323	109.598	408.407	108.073	408.323	109.576	408.407	105.146	408.323	108.835	408.407	108.078
408.819	100.87	408.735	108.433	408.819	100.929	408.735	108.44	408.735	106.792	408.735	106.791	408.735	106.792	408.735	106.793	408.735	117.521	408.819	101.683	408.735	102.629	408.819	101.73	408.735	102.577	408.819	99.6951	408.735	102.019	408.819	101.734
409.231	106.616	409.147	115.859	409.231	106.692	409.147	115.866	409.147	113.313	409.147	113.311	409.147	113.311	409.147	113.312	409.147	126.217	409.231	107.088	409.147	108.899	409.231	107.167	409.147	108.881	409.231	104.117	409.147	108.116	409.231	107.172
409.644	104.796	409.559	112.495	409.644	104.862	409.559	112.502	409.559	110.503	409.559	110.502	409.559	110.502	409.559	110.503	409.559	122.14	409.644	105.481	409.559	106.239	409.644	105.54	409.559	106.199	409.644	103.134	409.559	105.566	409.644	105.544
410.056	104.819	409.971	114.557	410.056	104.896	409.971	114.564	409.971	111.907	409.971	111.906	409.971	111.905	409.971	111.906	409.971	125.032	410.056	105.242	409.971	107.468	410.056	105.325	409.971	107.454	410.056	102.124	409.971	106.663	410.056	105.33
410.468	107.095	410.383	114.99	410.468	107.164	410.383	114.997	410.383	112.811	410.383	112.81	410.383	112.81	410.383	112.811	410.383	124.899	410.468	107.715	410.383	108.495	410.468	107.78	410.383	108.462	410.468	105.181	410.383	107.786	410.468	107.785
410.88	101.651	410.795	112.344	410.88	101.731	410.795	112.351	410.795	109.575	410.795	109.573	410.795	109.573	410.795	109.574	410.795	122.945	410.88	102.002	410.795	105.111	410.88	102.092	410.795	105.102	410.88	98.6828	410.795	104.281	410.88	102.097
411.292	108.429	411.207	116.515	411.292	108.5	411.207	116.522	411.207	114.213	411.207	114.212	411.207	114.212	411.207	114.213	411.207	126.586	411.292	109.007	411.207	109.862	411.292	109.076	411.207	109.834	411.292	106.349	411.207	109.129	411.292	109.081
411.704	96.382	411.619	108.999	411.704	96.4612	411.619	109.006	411.619	106.16	411.619	106.158	411.619	106.158	411.619	106.159	411.619	119.662	411.704	96.702	411.619	101.706	411.704	96.7919	411.619	101.7	411.704	93.474	411.619	100.866	411.704	96.7965
412.116	109.045	412.031	117.329	412.116	109.117	412.031	117.336	412.031	114.932	412.031	114.93	412.031	114.93	412.031	114.931	412.031	127.521	412.116	109.59	412.031	110.554	412.116	109.662	412.031	110.53	412.116	106.833	412.031	109.802	412.116	109.667
412.528	95.7553	412.443	106.042	412.528	95.8108	412.443	106.048	412.443	103.74	412.443	103.737	412.443	103.739	412.443	103.738	412.443	116.061	412.528	96.6039	412.443	99.4777	412.528	96.6429	412.443	99.4496	412.528	94.8507	412.443	98.7595	412.528	96.6476
412.94	109.03	412.855	117.541	412.94	109.103	412.855	117.548	412.855	115.06	412.855	115.059	412.855	115.059	412.855	115.06	412.855	127.835	412.94	109.545	412.855	110.659	412.94	109.62	412.855	110.638	412.94	106.699	412.855	109.89	412.94	109.625
413.353	101.586	413.267	108.483	413.353	101.647	413.267	108.49	413.267	106.589	413.267	106.587	413.267	106.588	413.267	106.589	413.267	117.911	413.353	102.33	413.267	102.381	413.353	102.382	413.267	102.34	413.353	100.172	413.267	101.727	413.353	102.387
413.765	108.378	413.679	117.175	413.765	108.452	413.679	117.182	413.679	114.612	413.679	114.611	413.679	114.611	413.679	114.612	413.679	127.567	413.765	108.864	413.679	110.189	413.765	108.942	413.679	110.171	413.765	105.927	413.679	109.402	413.765	108.946
414.177	105.373	414.091	112.229	414.177	105.44	414.091	112.235	414.091	110.153	414.091	110.152	414.091	110.153	414.091	110.153	414.091	121.962	414.177	106.025	414.091	105.875	414.177	106.086	414.091	105.839	414.177	103.588	414.091	105.186	414.177	106.091
414.589	107.002	414.504	116.194	414.589	107.078	414.504	116.2	414.504	113.542	414.504	113.541	414.504	113.54	414.504	113.541	414.504	126.687	414.589	107.454	414.504	109.095	414.589	107.535	414.504	109.081	414.589	104.416	414.504	108.29	414.589	107.54
415.001	107.725	414.916	114.875	415.001	107.795	414.916	114.882	414.916	112.641	414.916	112.64	414.916	112.641	414.916	112.641	414.916	124.846	415.001	108.324	414.916	108.313	415.001	108.391	414.916	108.282	415.001	105.728	414.916	107.593	415.001	108.396
415.413	104.714	415.328	114.492	415.413	104.792	415.328	114.498	415.328	111.736	415.328	111.734	415.328	111.734	415.328	111.735	415.328	125.098	415.413	105.125	415.328	107.262	415.413	105.21	415.328	107.253	415.413	101.966	415.328	106.434	415.413	105.215
415.825	109.155	415.74	116.581	415.825	109.226	415.74	116.588	415.74	114.233	415.74	114.232	415.74	114.232	415.74	114.233	415.74	126.708	415.825	109.718	415.74	109.87	415.825	109.788	415.74	109.844	415.825	107.013	415.74	109.128	415.825	109.793
416.237	101.351	416.152	111.918	416.237	101.429	416.152	111.925	416.152	109.047	416.152	109.045	416.152	109.045	416.152	109.046	416.152	122.638	416.237	101.729	416.152	104.551	416.237	101.816	416.152	104.547	416.237	98.5113	416.152	103.699	416.237	101.821
416.65	109.894	416.564	117.57	416.65	109.967	416.564	117.577	416.564	115.132	416.564	115.131	416.564	115.131	416.564	115.132	416.564	127.814	416.65	110.429	416.564	110.743	416.65	110.502	416.564	110.72	416.65	107.637	416.564	109.982	416.65	110.507
417.062	98.7848	416.976	108.769	417.062	98.8548	416.976	108.775	416.976	105.938	416.976	105.935	416.976	105.935	416.976	105.935	416.976	119.424	417.062	99.3113	416.976	101.487	417.062	99.3814	416.976	101.481	417.062	96.6346	416.976	100.649	417.062	99.3861
417.474	110.04	417.388	117.96	417.474	110.114	417.388	117.967	417.388	115.443	417.388	115.442	417.388	115.441	417.388	115.443	417.388	128.304	417.474	110.549	417.388	111.03	417.474	110.625	417.388	111.01	417.474	107.679	417.388	110.253	417.474	110.63
417.886	101.43	417.8	108.076	417.886	101.495	417.8	108.083	417.8	105.772	417.8	105.77	417.8	105.772	417.8	105.771	417.8	118.076	417.886	102.091	417.8	101.479	417.886	102.151	417.8	101.451	417.886	99.7266	417.8	100.752	417.886	102.155
418.298	109.612	418.212	117.796	418.298	109.687	418.212	117.802	418.212	115.201	418.212	115.2	418.212	115.2	418.212	115.201	418.212	128.234	418.298	110.096	418.212	110.765	418.298	110.174	418.212	110.749	418.298	107.147	418.212	109.973	418.298	110.179
418.71	105.007	418.624	111.008	418.71	105.074	418.624	111.015	418.624	108.834	418.624	108.832	418.624	108.833	418.624	108.834	418.624	120.849	418.71	105.629	418.624	104.542	418.71	105.694	418.624	104.51	418.71	103.117	418.624	103.834	418.71	105.698
419.122	108.567	419.036	117.063	419.122	108.643	419.036	117.07	419.036	114.384	419.036	114.382	419.036	114.382	419.036	114.383	419.036	127.601	419.122	109.023	419.036	109.924	419.122	109.104	419.036	109.911	419.122	105.987	419.036	109.113	419.122	109.109
419.534	107.523	419.448	113.877	419.534	107.593	419.448	113.883	419.448	111.596	419.448	111.595	419.448	111.595	419.448	111.596	419.448	123.89	419.534	108.103	419.448	107.261	419.534	108.172	419.448	107.232	419.534	105.457	419.448	106.532	419.534	108.177
419.946	106.796	419.86	115.686	419.946	106.874	419.86	115.693	419.86	112.906	419.86	112.904	419.86	112.904	419.86	112.905	419.86	126.339	419.946	107.217	419.86	108.417	419.946	107.301	419.86	108.408	419.946	104.075	419.86	107.584	419.946	107.306
420.359	109.138	420.272	115.862	420.359	109.21	420.272	115.868	420.272	113.475	420.272	113.474	420.272	113.474	420.272	113.475	420.272	126.028	420.359	109.687	420.272	109.104	420.359	109.759	420.272	109.079	420.359	106.94	420.272	108.354	420.359	109.764
420.771	104.165	420.684	113.525	420.771	104.244	420.684	113.531	420.684	110.61	420.684	110.608	420.684	110.608	420.684	110.608	420.684	124.318	420.771	104.545	420.684	106.086	420.771	104.632	420.684	106.083	420.771	101.284	420.684	105.223	420.771	104.637
421.183	110.055	421.096	117.085	421.183	110.128	421.096	117.092	421.096	114.61	421.096	114.609	421.096	114.608	421.096	114.61	421.096	127.372	421.183	110.578	421.096	110.21	421.183	110.652	421.096	110.189	421.183	107.749	421.096	109.442	421.183	110.657
421.595	101.1	421.508	110.461	421.595	101.177	421.508	110.468	421.508	107.393	421.508	107.391	421.508	107.39	421.508	107.391	421.508	121.398	421.595	101.48	421.508	102.84	421.595	101.567	421.508	102.845	421.595	98.2741	421.508	101.943	421.595	101.571
422.007	110.382	421.92	117.68	422.007	110.456	421.92	117.686	421.92	115.125	421.92	115.124	421.92	115.123	421.92	115.124	421.92	128.07	422.007	110.882	421.92	110.701	422.007	110.958	421.92	110.683	422.007	107.979	421.92	109.916	422.007	110.963
422.419	100.779	422.332	107.588	422.419	100.851	422.332	107.595	422.332	104.694	422.332	104.693	422.332	104.694	422.332	104.694	422.332	118.314	422.419	101.315	422.332	100.243	422.419	101.385	422.332	100.237	422.419	98.6078	422.332	99.3952	422.419	101.39
422.831	110.158	422.744	117.709	422.831	110.233	422.744	117.716	422.744	115.076	422.744	115.074	422.744	115.074	422.744	115.075	422.744	128.197	422.831	110.634	422.744	110.627	422.831	110.713	422.744	110.613	422.831	107.657	422.744	109.826	422.831	110.718
423.243	103.727	423.156	108.738	423.243	103.796	423.156	108.745	423.156	106.386	423.156	106.384	423.156	106.385	423.156	106.385	423.156	118.799	423.243	104.312	423.156	102.072	423.243	104.38	423.156	102.047	423.243	101.709	423.156	101.334	423.243	104.384
423.655	109.361	423.568	117.176	423.655	109.437	423.568	117.182	423.568	114.457	423.568	114.455	423.568	114.455	423.568	114.456	423.568	127.767	423.655	109.81	423.568	109.982	423.655	109.892	423.568	109.971	423.655	106.751	423.568	109.163	423.655	109.897
424.068	106.478	423.98	111.884	424.068	106.549	423.98	111.891	423.98	109.563	423.98	109.562	423.98	109.563	423.98	109.564	423.98	121.926	424.068	107.041	423.98	105.23	424.068	107.112	423.98	105.202	424.068	104.348	423.98	104.493	424.068	107.116
424.48	107.915	424.392	116.028	424.48	107.993	424.392	116.034	424.392	113.205	424.392	113.203	424.392	113.203	424.392	113.204	424.392	126.74	424.48	108.332	424.392	108.699	424.48	108.417	424.392	108.692	424.48	105.171	424.392	107.856	424.48	108.422
424.892	108.366	424.804	114.309	424.892	108.438	424.804	114.316	424.804	111.895	424.804	111.893	424.804	111.893	424.804	111.894	424.804	124.494	424.892	108.901	424.804	107.522	424.892	108.975	424.804	107.499	424.892	106.116	424.804	106.766	424.892	108.979
425.304	105.676	425.216	114.124	425.304	105.755	425.216	114.13	425.216	111.156	425.216	111.155	425.216	111.154	425.216	111.155	425.216	124.995	425.304	106.049	425.216	106.607	425.304	106.138	425.216	106.606	425.304	102.748	425.216	105.732	425.304	106.143
425.716	109.512	425.628	115.859	425.716	109.586	425.628	115.866	425.628	113.352	425.628	113.351	425.628	113.351	425.628	113.352	425.628	126.175	425.716	110.023	425.628	108.947	425.716	110.099	425.628	108.928	425.716	107.158	425.628	108.173	425.716	110.104
426.128	102.568	426.04	111.201	426.128	102.652	426.04	111.207	426.04	108.003	426.04	108.001	426.04	108.001	426.04	108.002	426.04	122.305	426.128	102.888	426.04	103.389	426.128	102.982	426.04	103.397	426.128	99.4269	426.04	102.46	426.128	102.987
426.54	110.038	426.452	116.695	426.54	110.114	426.452	116.701	426.452	114.102	426.452	114.101	426.452	114.1	426.452	114.101	426.452	127.124	426.54	110.526	426.452	109.669	426.54	110.605	426.452	109.653	426.54	107.587	426.452	108.876	426.54	110.609
426.952	99.9494	426.864	107.088	426.952	100.027	426.864	107.093	426.864	103.588	426.864	103.585	426.864	103.583	426.864	103.584	426.864	118.463	426.952	100.31	426.864	98.9168	426.952	100.397	426.864	98.9419	426.952	97.0635	426.864	97.9188	426.952	100.402
427.365	110.003	427.276	116.916	427.365	110.079	427.276	116.923	427.276	114.239	427.276	114.237	427.276	114.237	427.276	114.238	427.276	127.454	427.365	110.468	427.276	109.778	427.365	110.549	427.276	109.765	427.365	107.455	427.276	108.968	427.365	110.553
427.777	101.428	427.689	105.079	427.777	101.499	427.689	105.086	427.689	102.288	427.689	102.285	427.689	102.286	427.689	102.286	427.689	115.727	427.777	101.95	427.689	97.9133	427.777	102.023	427.689	97.9038	427.777	99.1924	427.689	97.1044	427.777	102.028
428.189	109.403	428.101	116.548	428.189	109.48	428.101	116.555	428.101	113.779	428.101	113.777	428.101	113.777	428.101	113.778	428.101	127.2	428.189	109.842	428.101	109.289	428.189	109.925	428.101	109.279	428.189	106.745	428.101	108.458	428.189	109.93
428.601	104.49	428.513	108.614	428.601	104.561	428.513	108.62	428.513	106.299	428.513	106.297	428.513	106.297	428.513	106.298	428.513	118.626	428.601	105.033	428.513	101.993	428.601	105.105	428.513	101.967	428.601	102.297	428.513	101.262	428.601	105.11
429.013	108.178	428.925	115.556	429.013	108.257	428.925	115.562	428.925	112.673	428.925	112.672	428.925	112.671	428.925	112.672	428.925	126.342	429.013	108.585	428.925	108.147	429.013	108.671	428.925	108.142	429.013	105.384	428.925	107.292	429.013	108.676
429.425	106.795	429.337	111.865	429.425	106.867	429.337	111.872	429.337	109.467	429.337	109.465	429.337	109.465	429.337	109.466	429.337	122.006	429.425	107.317	429.337	105.111	429.425	107.391	429.337	105.088	429.425	104.501	429.337	104.359	429.425	107.396
429.837	106.18	429.749	113.802	429.837	106.261	429.749	113.808	429.749	110.76	429.749	110.759	429.749	110.757	429.749	110.759	429.749	124.769	429.837	106.542	429.749	106.182	429.837	106.633	429.749	106.184	429.837	103.191	429.749	105.291	429.837	106.638
430.249	108.25	430.161	113.908	430.249	108.324	430.161	113.915	430.161	111.395	430.161	111.394	430.161	111.394	430.161	111.395	430.161	124.213	430.249	108.748	430.161	106.997	430.249	108.825	430.161	106.978	430.249	105.849	430.161	106.221	430.249	108.83
430.661	103.142	430.573	110.961	430.661	103.227	430.573	110.967	430.573	107.644	430.573	107.643	430.573	107.642	430.573	107.644	430.573	122.219	430.661	103.429	430.573	102.978	430.661	103.527	430.573	102.991	430.661	99.8292	430.573	102.021	430.661	103.532
431.074	109.006	430.985	115.04	431.074	109.081	430.985	115.047	430.985	112.423	430.985	112.421	430.985	112.421	430.985	112.422	430.985	125.485	431.074	109.48	430.985	107.988	431.074	109.559	430.985	107.973	431.074	106.502	430.985	107.19	431.074	109.564
431.486	99.0255	431.397	106.208	431.486	99.1141	431.397	106.214	431.397	102.233	431.397	102.231	431.397	102.229	431.397	102.23	431.397	118.068	431.486	99.2097	431.397	97.3495	431.486	99.3166	431.397	97.3953	431.486	95.3033	431.397	96.2175	431.486	99.3212
431.898	109.149	431.809	115.446	431.898	109.226	431.809	115.453	431.809	112.726	431.809	112.725	431.809	112.724	431.809	112.726	431.809	126.023	431.898	109.6	431.809	108.257	431.898	109.682	431.809	108.247	431.898	106.541	431.809	107.438	431.898	109.686
432.31	97.7194	432.221	98.8551	432.31	97.7981	432.221	98.8623	432.221	94.361	432.221	94.3549	432.221	94.3606	432.221	94.3562	432.221	111.419	432.31	98.1013	432.221	89.7526	432.31	98.1864	432.221	89.7933	432.31	95.0056	432.221	88.7077	432.31	98.191
432.722	108.704	432.633	115.197	432.722	108.782	432.633	115.203	432.633	112.365	432.633	112.364	432.633	112.363	432.633	112.365	432.633	125.911	432.722	109.127	432.633	107.86	432.722	109.212	432.633	107.853	432.722	105.979	432.633	107.016	432.722	109.217
433.134	101.33	433.045	103.789	433.134	101.401	433.045	103.795	433.045	101.901	433.045	101.898	433.045	101.9	433.045	101.9	433.045	113.277	433.134	101.86	433.045	97.767	433.134	101.931	433.045	97.7244	433.134	99.1245	433.045	97.1325	433.134	101.936
433.546	107.621	433.457	114.268	433.546	107.701	433.457	114.275	433.457	111.3	433.457	111.298	433.457	111.298	433.457	111.299	433.457	125.146	433.546	108.01	433.457	106.749	433.546	108.099	433.457	106.748	433.546	104.749	433.457	105.874	433.546	108.104
433.958	104.391	433.869	108.874	433.958	104.464	433.869	108.88	433.869	106.679	433.869	106.677	433.869	106.678	433.869	106.678	433.869	118.727	433.958	104.91	433.869	102.399	433.958	104.984	433.869	102.368	433.958	102.099	433.869	101.689	433.958	104.988
434.37	105.75	434.281	112.52	434.37	105.832	434.281	112.526	434.281	109.358	434.281	109.356	434.281	109.354	434.281	109.356	434.281	123.622	434.37	106.091	434.281	104.739	434.37	106.184	434.281	104.747	434.37	102.665	434.281	103.82	434.37	106.188
434.783	106.294	434.693	111.597	434.783	106.369	434.693	111.604	434.693	109.182	434.693	109.181	434.693	109.181	434.693	109.182	434.693	121.758	434.783	106.786	434.693	104.824	434.783	106.863	434.693	104.801	434.783	103.874	434.693	104.069	434.783	106.868
435.195	102.733	435.105	109.572	435.195	102.819	435.105	109.578	435.105	106.067	435.105	106.066	435.105	106.063	435.105	106.066	435.105	121.046	435.195	102.987	435.105	101.326	435.195	103.09	435.105	101.347	435.195	99.2604	435.105	100.324	435.195	103.094
435.607	107.317	435.517	113.025	435.607	107.393	435.517	113.032	435.517	110.449	435.517	110.447	435.517	110.447	435.517	110.448	435.517	123.401	435.607	107.78	435.517	106.036	435.607	107.86	435.517	106.019	435.607	104.772	435.517	105.247	435.607	107.865
436.019	97.6719	435.929	104.214	436.019	97.7682	435.929	104.221	435.929	99.8056	435.929	99.8042	435.929	99.7999	435.929	99.804	435.929	116.572	436.019	97.7097	435.929	94.7032	436.019	97.8347	435.929	94.7683	436.019	93.1821	435.929	93.4623	436.019	97.8394
436.431	107.627	436.341	113.552	436.431	107.704	436.341	113.558	436.341	110.831	436.341	110.83	436.341	110.83	436.341	110.83	436.341	124.11	436.431	108.061	436.341	106.372	436.431	108.144	436.341	106.361	436.431	104.955	436.341	105.552	436.431	108.149
436.843	91.1486	436.753	85.9617	436.843	91.241	436.753	85.9632	436.753	84.7905	436.753	84.8109	436.753	84.8213	436.753	84.8248	436.753	105.73	436.843	91.0775	436.753	82.7358	436.843	91.2001	436.753	82.34	436.843	87.0261	436.753	83.6454	436.843	91.2045
437.255	107.278	437.165	113.306	437.255	107.357	437.165	113.312	437.165	110.431	437.165	110.43	437.165	110.429	437.165	110.43	437.165	124.049	437.255	107.68	437.165	105.922	437.255	107.766	437.165	105.917	437.255	104.465	437.165	105.068	437.255	107.771
437.667	96.9505	437.577	101.515	437.667	97.0155	437.577	101.525	437.577	100.825	437.577	100.823	437.577	100.827	437.577	100.827	437.577	108.77	437.667	97.5666	437.577	96.9151	437.667	97.6284	437.577	96.8344	437.667	95.1996	437.577	96.4582	437.667	97.633
438.08	106.232	437.989	112.264	438.08	106.314	437.989	112.271	437.989	109.195	437.989	109.195	437.989	109.194	437.989	109.196	437.989	123.232	438.08	106.594	437.989	104.623	438.08	106.685	437.989	104.625	438.08	103.24	437.989	103.725	438.08	106.69
438.492	101.546	438.401	107.548	438.492	101.615	438.401	107.555	438.401	105.777	438.401	105.775	438.401	105.776	438.401	105.777	438.401	116.794	438.492	102.11	438.401	101.596	438.492	102.179	438.401	101.551	438.492	99.4724	438.401	100.964	438.492	102.184
438.904	104.326	438.813	110.23	438.904	104.409	438.813	110.236	438.813	106.867	438.813	106.865	438.813	106.863	438.813	106.865	438.813	121.522	438.904	104.628	438.813	102.19	438.904	104.725	438.813	102.207	438.904	101.068	438.813	101.221	438.904	104.729
439.316	104.028	439.225	110.39	439.316	104.101	439.225	110.396	439.225	108.228	439.225	108.226	439.225	108.226	439.225	108.227	439.225	120.214	439.316	104.54	439.225	103.939	439.316	104.614	439.225	103.907	439.316	101.71	439.225	103.233	439.316	104.619
439.728	101.106	439.637	106.624	439.728	101.195	439.637	106.63	439.637	102.682	439.637	102.679	439.637	102.676	439.637	102.678	439.637	118.512	439.728	101.3	439.637	97.7816	439.728	101.409	439.637	97.8268	439.728	97.3534	439.637	96.663	439.728	101.413
440.14	105.298	440.049	111.791	440.14	105.373	440.049	111.798	440.049	109.393	440.049	109.392	440.049	109.392	440.049	109.393	440.049	121.934	440.14	105.766	440.049	105.037	440.14	105.846	440.049	105.013	440.14	102.79	440.049	104.285	440.14	105.851
440.552	95.0316	440.461	99.4836	440.552	95.1358	440.461	99.4887	440.461	94.217	440.461	94.2183	440.461	94.2091	440.461	94.2166	440.461	112.937	440.552	94.9159	440.461	88.7586	440.552	95.0577	440.461	88.833	440.552	89.7665	440.461	87.4914	440.552	95.0624
440.964	105.693	440.873	112.216	440.964	105.771	440.873	112.222	440.873	109.628	440.873	109.626	440.873	109.626	440.873	109.627	440.873	122.599	440.964	106.121	440.873	105.216	440.964	106.205	440.873	105.2	440.964	103.006	440.873	104.425	440.964	106.209
441.376	66.0936	441.286	96.9596	441.376	65.2382	441.286	96.9686	441.286	97.5221	441.286	97.5232	441.286	97.5253	441.286	97.5265	441.286	104.325	441.376	76.1507	441.286	93.7849	441.376	75.6185	441.286	93.6612	441.376	83.1679	441.286	93.531	441.376	75.6241
441.789	105.313	441.698	111.777	441.789	105.392	441.698	111.784	441.698	108.995	441.698	108.992	441.698	108.993	441.698	108.994	441.698	122.395	441.789	105.695	441.698	104.526	441.789	105.784	441.698	104.518	441.789	102.426	441.698	103.693	441.789	105.789
442.201	95.1093	442.11	105.271	442.201	95.1582	442.11	105.278	442.11	104.13	442.11	104.129	442.11	104.13	442.11	104.131	442.11	113.593	442.201	96.0694	442.11	100.069	442.201	96.0982	442.11	100.002	442.201	94.5615	442.11	99.5421	442.201	96.1029
442.613	104.107	442.522	110.389	442.613	104.189	442.522	110.395	442.522	107.352	442.522	107.35	442.522	107.349	442.522	107.35	442.522	121.292	442.613	104.431	442.522	102.809	442.613	104.525	442.522	102.813	442.613	100.958	442.522	101.919	442.613	104.529
443.025	100.335	442.934	109.223	443.025	100.4	442.934	109.231	442.934	107.477	442.934	107.476	442.934	107.477	442.934	107.478	442.934	118.487	443.025	101.026	442.934	103.279	443.025	101.084	442.934	103.231	443.025	98.7499	442.934	102.65	443.025	101.088
443.437	101.826	443.346	107.653	443.437	101.914	443.346	107.661	443.346	104.172	443.346	104.17	443.346	104.169	443.346	104.171	443.346	119.014	443.437	102.057	443.346	99.4975	443.437	102.162	443.346	99.5198	443.437	98.2524	443.346	98.5019	443.437	102.167
443.849	102.874	443.758	111.359	443.849	102.943	443.758	111.366	443.758	109.309	443.758	109.308	443.758	109.309	443.758	109.309	443.758	121.055	443.849	103.46	443.758	105.036	443.849	103.527	443.758	104.999	443.849	100.86	443.758	104.351	443.849	103.532
444.261	97.708	444.17	102.128	444.261	97.8048	444.17	102.133	444.17	97.3128	444.17	97.3084	444.17	97.3061	444.17	97.3065	444.17	114.626	444.261	97.745	444.17	92.1959	444.261	97.8698	444.17	92.2891	444.261	93.2027	444.17	90.82	444.261	97.8744
444.673	104.091	444.582	112.416	444.673	104.164	444.582	112.422	444.582	110.164	444.582	110.163	444.582	110.164	444.582	110.165	444.582	122.381	444.673	104.61	444.582	105.84	444.673	104.684	444.582	105.81	444.673	101.801	444.582	105.116	444.673	104.689
445.086	88.589	444.994	66.7583	445.086	88.7232	444.994	66.7234	444.994	87.7604	444.994	87.759	444.994	87.7684	444.994	87.7645	444.994	102.609	445.086	88.0943	444.994	85.5019	445.086	88.2801	444.994	85.2161	445.086	82.6469	444.994	86.0272	445.086	88.2849
445.498	104.362	445.406	112.636	445.498	104.437	445.406	112.643	445.406	110.224	445.406	110.222	445.406	110.223	445.406	110.223	445.406	122.808	445.498	104.825	445.406	105.857	445.498	104.905	445.406	105.834	445.498	101.837	445.406	105.102	445.498	104.909
445.91	90.6707	445.818	102.424	445.91	90.6965	445.818	102.433	445.818	101.808	445.818	101.808	445.818	101.81	445.818	101.811	445.818	109.813	445.91	92.1908	445.818	97.8584	445.91	92.1762	445.818	97.7736	445.91	91.8402	445.818	97.4128	445.91	92.1811
446.322	103.768	446.23	112.072	446.322	103.847	446.23	112.078	446.23	109.504	446.23	109.503	446.23	109.503	446.23	109.504	446.23	122.429	446.322	104.171	446.23	105.099	446.322	104.257	446.23	105.082	446.322	100.991	446.23	104.312	446.322	104.262
446.734	98.3209	446.642	108.19	446.734	98.3751	446.642	108.197	446.642	106.646	446.642	106.646	446.642	106.646	446.642	106.648	446.642	117.185	446.734	99.2212	446.642	102.488	446.734	99.2593	446.642	102.433	446.734	97.4693	446.642	101.895	446.734	99.264
447.146	102.179	447.054	110.616	447.146	102.261	447.054	110.623	447.054	107.875	447.054	107.873	447.054	107.873	447.054	107.874	447.054	121.173	447.146	102.501	447.054	103.429	447.146	102.595	447.054	103.419	447.146	99.0568	447.054	102.606	447.146	102.6
447.558	101.894	447.466	111.216	447.558	101.957	447.466	111.223	447.466	109.315	447.466	109.314	447.466	109.315	447.466	109.316	447.466	120.736	447.558	102.615	447.466	105.07	447.558	102.67	447.466	105.027	447.558	100.384	447.466	104.413	447.558	102.675
447.97	99.1118	447.878	107.951	447.97	99.1995	447.878	107.958	447.878	104.992	447.878	104.989	447.878	104.988	447.878	104.989	447.878	118.751	447.97	99.2871	447.878	100.507	447.97	99.3956	447.878	100.507	447.97	95.3416	447.878	99.641	447.97	99.4002
448.382	103.817	448.29	112.955	448.382	103.884	448.29	112.962	448.29	110.849	448.29	110.848	448.29	110.848	448.29	110.849	448.29	122.756	448.382	104.447	448.29	106.552	448.382	104.511	448.29	106.517	448.382	101.96	448.29	105.856	448.382	104.516
448.795	92.6801	448.702	103.47	448.795	92.7893	448.702	103.477	448.702	100.446	448.702	100.442	448.702	100.444	448.702	100.444	448.702	114.428	448.795	92.3906	448.702	96.0449	448.795	92.5453	448.702	96.0427	448.795	86.668	448.702	95.2022	448.795	92.5498
449.207	104.722	449.114	113.845	449.207	104.793	449.114	113.852	449.114	111.593	449.114	111.592	449.114	111.593	449.114	111.593	449.114	123.833	449.207	105.293	449.114	107.259	449.207	105.362	449.114	107.229	449.207	102.629	449.114	106.536	449.207	105.367
449.619	81.7891	449.526	100.497	449.619	81.7392	449.526	100.504	449.526	99.2948	449.526	99.2933	449.526	99.2958	449.526	99.2953	449.526	109.078	449.619	84.5227	449.526	95.3619	449.619	84.3911	449.526	95.294	449.619	86.5925	449.526	94.8548	449.619	84.396
450.031	104.821	449.938	114.049	450.031	104.893	449.938	114.055	449.938	111.68	449.938	111.678	449.938	111.678	449.938	111.679	449.938	124.184	450.031	105.342	449.938	107.316	450.031	105.416	449.938	107.291	450.031	102.53	449.938	106.569	450.031	105.42
450.443	96.0997	450.35	105.703	450.443	96.1482	450.35	105.71	450.35	104.338	450.35	104.338	450.35	104.339	450.35	104.34	450.35	114.304	450.443	97.1339	450.35	100.247	450.443	97.1599	450.35	100.187	450.443	95.7153	450.35	99.6831	450.443	97.1647
450.855	104.138	450.762	113.611	450.855	104.213	450.762	113.618	450.762	111.136	450.762	111.134	450.762	111.134	450.762	111.135	450.762	123.873	450.855	104.611	450.762	106.746	450.855	104.69	450.762	106.725	450.855	101.655	450.762	105.977	450.855	104.694
451.267	101.082	451.174	109.855	451.267	101.142	451.174	109.862	451.174	108.057	451.174	108.056	451.174	108.057	451.174	108.057	451.174	119.21	451.267	101.867	451.174	103.841	451.267	101.916	451.174	103.796	451.267	99.8007	451.174	103.203	451.267	101.92
451.679	102.569	451.586	112.507	451.679	102.647	451.586	112.514	451.586	109.93	451.586	109.928	451.586	109.929	451.586	109.929	451.586	122.883	451.679	102.986	451.586	105.518	451.679	103.07	451.586	105.501	451.679	99.8701	451.586	104.728	451.679	103.075
452.091	103.805	451.998	112.452	452.091	103.871	451.998	112.459	451.998	110.414	451.998	110.413	451.998	110.413	451.998	110.415	451.998	122.164	452.091	104.487	451.998	106.133	452.091	104.547	451.998	106.095	452.091	102.134	451.998	105.451	452.091	104.551
452.504	99.8315	452.41	110.674	452.504	99.9109	452.41	110.68	452.41	108.011	452.41	108.009	452.41	108.009	452.41	108.01	452.41	121.138	452.504	100.182	452.41	103.588	452.504	100.271	452.41	103.575	452.504	96.8934	452.41	102.782	452.504	100.276
452.916	105.372	452.822	114.055	452.916	105.44	452.822	114.062	452.822	111.864	452.822	111.862	452.822	111.863	452.822	111.863	452.822	123.979	452.916	105.992	452.822	107.541	452.916	106.057	452.822	107.509	452.916	103.463	452.822	106.829	452.916	106.062
453.328	95.786	453.234	108.234	453.328	95.8626	453.234	108.241	453.234	105.607	453.234	105.604	453.234	105.605	453.234	105.605	453.234	118.646	453.328	96.1452	453.234	101.219	453.328	96.23	453.234	101.205	453.328	93.0783	453.234	100.425	453.328	96.2346
453.74	106.136	453.646	114.937	453.74	106.207	453.646	114.943	453.646	112.63	453.646	112.629	453.646	112.629	453.646	112.63	453.646	125.008	453.74	106.713	453.646	108.277	453.74	106.783	453.646	108.249	453.74	104.056	453.646	107.543	453.74	106.787
454.152	94.8549	454.058	106.59	454.152	94.9096	454.058	106.596	454.058	104.371	454.058	104.368	454.058	104.369	454.058	104.368	454.058	116.484	454.152	95.6562	454.058	100.109	454.152	95.6976	454.058	100.079	454.152	93.8293	454.058	99.4002	454.152	95.7023
454.564	106.241	454.471	115.224	454.564	106.314	454.471	115.23	454.471	112.822	454.471	112.821	454.471	112.821	454.471	112.823	454.471	125.413	454.564	106.782	454.471	108.444	454.564	106.855	454.471	108.42	454.564	104.019	454.471	107.691	454.564	106.86
454.976	99.2311	454.883	108.018	454.976	99.2901	454.883	108.025	454.883	106.089	454.883	106.088	454.883	106.089	454.883	106.089	454.883	117.5	454.976	100.029	454.883	101.871	454.976	100.076	454.883	101.83	454.976	98.029	454.883	101.21	454.976	100.081
455.388	105.728	455.295	114.97	455.388	105.801	455.295	114.977	455.295	112.484	455.295	112.482	455.295	112.482	455.295	112.483	455.295	125.262	455.388	106.236	455.295	108.083	455.388	106.312	455.295	108.063	455.388	103.375	455.295	107.312	455.388	106.316
455.801	102.75	455.707	110.719	455.801	102.815	455.707	110.726	455.707	108.697	455.707	108.695	455.707	108.697	455.707	108.697	455.707	120.371	455.801	103.452	455.707	104.432	455.801	103.51	455.707	104.394	455.801	101.161	455.707	103.752	455.801	103.515
456.213	104.58	456.119	114.187	456.213	104.656	456.119	114.193	456.119	111.619	456.119	111.618	456.119	111.618	456.119	111.618	456.119	124.57	456.213	105.056	456.119	107.2	456.213	105.135	456.119	107.182	456.213	102.105	456.119	106.412	456.213	105.139
456.625	105.044	456.531	112.94	456.625	105.111	456.531	112.947	456.531	110.778	456.531	110.777	456.531	110.777	456.531	110.778	456.531	122.809	456.625	105.683	456.531	106.467	456.625	105.746	456.531	106.435	456.625	103.206	456.531	105.761	456.625	105.751
457.037	102.798	456.943	112.883	457.037	102.873	456.943	112.889	456.943	110.244	456.943	110.242	456.943	110.242	456.943	110.243	456.943	123.34	457.037	103.248	456.943	105.81	457.037	103.328	456.943	105.796	457.037	100.237	456.943	105.007	457.037	103.333
457.449	106.464	457.355	114.466	457.449	106.534	457.355	114.473	457.355	112.188	457.355	112.187	457.355	112.187	457.355	112.188	457.355	124.498	457.449	107.06	457.355	107.843	457.449	107.128	457.355	107.814	457.449	104.455	457.355	107.114	457.449	107.133
457.861	100.704	457.767	111.183	457.861	100.778	457.767	111.189	457.767	108.516	457.767	108.514	457.767	108.514	457.767	108.515	457.767	121.657	457.861	101.17	457.767	104.086	457.861	101.247	457.767	104.073	457.861	98.2418	457.767	103.278	457.861	101.252
458.273	107.22	458.179	115.381	458.273	107.291	458.179	115.388	458.179	113.009	458.179	113.007	458.179	113.007	458.179	113.008	458.179	125.539	458.273	107.782	458.179	108.636	458.273	107.853	458.179	108.611	458.273	105.077	458.179	107.889	458.273	107.858
458.685	99.7998	458.591	109.68	458.685	99.8693	458.591	109.686	458.591	107.119	458.591	107.117	458.591	107.118	458.591	107.118	458.591	120.012	458.685	100.372	458.591	102.734	458.685	100.438	458.591	102.717	458.685	97.7814	458.591	101.951	458.685	100.443
459.097	107.414	459.003	115.764	459.097	107.486	459.003	115.771	459.003	113.31	459.003	113.308	459.003	113.308	459.003	113.309	459.003	126.028	459.097	107.948	459.003	108.914	459.097	108.021	459.003	108.892	459.097	105.157	459.003	108.15	459.097	108.026
459.51	101.336	459.415	109.586	459.51	101.401	459.415	109.592	459.415	107.246	459.415	107.245	459.415	107.245	459.415	107.246	459.415	119.638	459.51	101.98	459.415	102.919	459.51	102.041	459.415	102.894	459.51	99.5568	459.415	102.18	459.51	102.046
459.922	107.091	459.827	115.661	459.922	107.165	459.827	115.668	459.827	113.129	459.827	113.127	459.827	113.127	459.827	113.128	459.827	126.017	459.922	107.599	459.827	108.712	459.922	107.675	459.827	108.693	459.922	104.73	459.827	107.932	459.922	107.68
460.334	103.665	460.239	111.023	460.334	103.732	460.239	111.029	460.239	108.77	460.239	108.769	460.239	108.769	460.239	108.77	460.239	120.977	460.334	104.295	460.239	104.451	460.334	104.358	460.239	104.423	460.334	101.805	460.239	103.728	460.334	104.363
460.746	106.276	460.651	115.093	460.746	106.351	460.651	115.099	460.651	112.485	460.651	112.483	460.651	112.483	460.651	112.484	460.651	125.536	460.746	106.759	460.651	108.048	460.746	106.838	460.651	108.032	460.746	103.818	460.651	107.252	460.746	106.842
461.158	105.581	461.063	112.788	461.158	105.651	461.063	112.795	461.063	110.493	461.063	110.492	461.063	110.492	461.063	110.493	461.063	122.819	461.158	106.18	461.063	106.153	461.158	106.247	461.063	106.125	461.158	103.585	461.063	105.421	461.158	106.251
461.57	105.014	461.475	114.077	461.57	105.09	461.475	114.084	461.475	111.395	461.475	111.394	461.475	111.393	461.475	111.394	461.475	124.601	461.57	105.477	461.475	106.94	461.57	105.557	461.475	106.928	461.57	102.477	461.475	106.129	461.57	105.562
461.982	106.904	461.887	114.211	461.982	106.974	461.887	114.218	461.887	111.842	461.887	111.84	461.887	111.84	461.887	111.841	461.887	124.354	461.982	107.472	461.887	107.474	461.982	107.542	461.887	107.45	461.982	104.783	461.887	106.727	461.982	107.546
462.394	103.522	462.299	112.691	462.394	103.597	462.299	112.698	462.299	109.949	462.299	109.947	462.299	109.947	462.299	109.948	462.299	123.274	462.394	103.978	462.299	105.484	462.394	104.058	462.299	105.474	462.394	100.972	462.299	104.659	462.394	104.062
462.807	107.673	462.711	115.149	462.807	107.746	462.711	115.155	462.711	112.702	462.711	112.701	462.711	112.701	462.711	112.702	462.711	125.396	462.807	108.216	462.711	108.311	462.807	108.289	462.711	108.289	462.807	105.446	462.711	107.549	462.807	108.293
463.219	102.455	463.123	111.227	463.219	102.529	463.123	111.234	463.123	108.482	463.123	108.48	463.123	108.48	463.123	108.481	463.123	121.797	463.219	102.941	463.123	104.027	463.219	103.017	463.123	104.017	463.219	100.044	463.123	103.203	463.219	103.022
463.631	107.95	463.535	115.608	463.631	108.023	463.535	115.615	463.535	113.088	463.535	113.086	463.535	113.086	463.535	113.087	463.535	125.952	463.631	108.468	463.535	108.674	463.631	108.543	463.535	108.655	463.631	105.626	463.535	107.896	463.631	108.548
464.043	102.689	463.947	110.401	464.043	102.761	463.947	110.407	463.947	107.765	463.947	107.764	463.947	107.764	463.947	107.764	463.947	120.831	464.043	103.228	463.947	103.35	464.043	103.3	463.947	103.337	464.043	100.488	463.947	102.55	464.043	103.304
464.455	107.77	464.359	115.613	464.455	107.845	464.359	115.62	464.359	113.02	464.359	113.018	464.359	113.018	464.359	113.019	464.359	126.047	464.455	108.266	464.359	108.584	464.455	108.343	464.359	108.568	464.455	105.353	464.359	107.792	464.455	108.347
464.867	104.015	464.771	110.826	464.867	104.085	464.771	110.832	464.771	108.33	464.771	108.328	464.771	108.329	464.771	108.329	464.771	121.088	464.867	104.576	464.771	103.951	464.867	104.646	464.771	103.931	464.867	101.888	464.771	103.179	464.867	104.65
465.279	107.16	465.183	115.18	465.279	107.236	465.183	115.187	465.183	112.511	465.183	112.509	465.183	112.509	465.183	112.511	465.183	125.703	465.279	107.633	465.183	108.054	465.279	107.713	465.183	108.041	465.279	104.652	465.183	107.246	465.279	107.717
465.691	105.516	465.595	112.055	465.691	105.587	465.595	112.061	465.595	109.604	465.595	109.602	465.595	109.602	465.595	109.603	465.595	122.272	465.691	106.071	465.595	105.227	465.691	106.142	465.595	105.205	465.691	103.35	465.595	104.464	465.691	106.146
466.103	106.164	466.007	114.323	466.103	106.24	466.007	114.33	466.007	111.574	466.007	111.572	466.007	111.572	466.007	111.573	466.007	124.936	466.103	106.615	466.007	107.096	466.103	106.696	466.007	107.086	466.103	103.57	466.007	106.27	466.103	106.701
466.516	106.71	466.419	113.314	466.516	106.782	466.419	113.32	466.419	110.835	466.419	110.833	466.419	110.833	466.419	110.834	466.419	123.581	466.516	107.247	466.419	106.443	466.516	107.32	466.419	106.423	466.516	104.467	466.419	105.674	466.516	107.325
466.928	104.912	466.831	113.084	466.928	104.989	466.831	113.09	466.831	110.253	466.831	110.251	466.831	110.25	466.831	110.252	466.831	123.78	466.928	105.347	466.831	105.755	466.928	105.429	466.831	105.749	466.928	102.257	466.831	104.911	466.928	105.434
467.34	107.473	467.243	114.241	467.34	107.547	467.243	114.248	467.243	111.706	467.243	111.705	467.243	111.705	467.243	111.706	467.243	124.588	467.34	107.991	467.243	107.294	467.34	108.066	467.243	107.275	467.34	105.146	467.243	106.513	467.34	108.071
467.752	103.76	467.656	111.619	467.752	103.836	467.656	111.625	467.656	108.727	467.656	108.725	467.656	108.724	467.656	108.726	467.656	122.369	467.752	104.196	467.656	104.22	467.752	104.278	467.656	104.217	467.752	101.121	467.656	103.363	467.752	104.283
468.164	107.8	468.068	114.744	468.164	107.874	468.068	114.751	468.068	112.143	468.068	112.142	468.068	112.142	468.068	112.143	468.068	125.179	468.164	108.297	468.068	107.709	468.164	108.374	468.068	107.693	468.164	105.388	468.068	106.915	468.164	108.379
468.576	103.315	468.48	110.38	468.576	103.39	468.48	110.386	468.48	107.508	468.48	107.505	468.48	107.505	468.48	107.506	468.48	121.094	468.576	103.778	468.48	103.019	468.576	103.857	468.48	103.015	468.576	100.796	468.48	102.167	468.576	103.862
468.988	107.707	468.892	114.813	468.988	107.783	468.892	114.819	468.892	112.139	468.892	112.138	468.892	112.138	468.892	112.139	468.892	125.337	468.988	108.183	468.892	107.683	468.988	108.262	468.892	107.67	468.988	105.208	468.892	106.873	468.988	108.267
469.4	103.849	469.304	110.042	469.4	103.923	469.304	110.049	469.304	107.292	469.304	107.29	469.304	107.29	469.304	107.29	469.304	120.609	469.4	104.343	469.304	102.845	469.4	104.42	469.304	102.836	469.4	101.453	469.304	102.021	469.4	104.424
469.812	107.213	469.716	114.448	469.812	107.289	469.716	114.455	469.716	111.695	469.716	111.693	469.716	111.693	469.716	111.694	469.716	125.068	469.812	107.667	469.716	107.215	469.812	107.748	469.716	107.205	469.812	104.623	469.716	106.388	469.812	107.753
470.225	104.899	470.128	110.71	470.225	104.973	470.128	110.717	470.128	108.07	470.128	108.068	470.128	108.068	470.128	108.069	470.128	121.15	470.225	105.404	470.128	103.65	470.225	105.48	470.128	103.636	470.225	102.539	470.128	102.849	470.225	105.485
470.637	106.347	470.54	113.653	470.637	106.425	470.54	113.659	470.54	110.809	470.54	110.807	470.54	110.807	470.54	110.808	470.54	124.375	470.637	106.778	470.54	106.303	470.637	106.861	470.54	106.296	470.637	103.663	470.54	105.456	470.637	106.866
471.049	105.913	470.952	111.752	471.049	105.986	470.952	111.759	470.952	109.138	470.952	109.136	470.952	109.136	470.952	109.137	470.952	122.17	471.049	106.412	470.952	104.717	471.049	106.489	470.952	104.702	471.049	103.523	470.952	103.92	471.049	106.494
471.461	105.195	471.364	112.445	471.461	105.273	471.364	112.452	471.364	109.498	471.364	109.496	471.364	109.495	471.364	109.496	471.364	123.277	471.461	105.603	471.364	104.963	471.461	105.689	471.364	104.962	471.461	102.422	471.364	104.093	471.461	105.694
471.873	106.625	471.776	112.632	471.873	106.701	471.776	112.639	471.776	109.987	471.776	109.986	471.776	109.986	471.776	109.987	471.776	123.097	471.873	107.112	471.776	105.552	471.873	107.19	471.776	105.537	471.873	104.176	471.776	104.748	471.873	107.195
472.285	103.98	472.188	110.911	472.285	104.059	472.188	110.918	472.188	107.857	472.188	107.855	472.188	107.855	472.188	107.856	472.188	121.846	472.285	104.374	472.188	103.299	472.285	104.461	472.188	103.302	472.285	101.155	472.188	102.405	472.285	104.465
472.697	106.958	472.6	113.14	472.697	107.033	472.6	113.147	472.6	110.437	472.6	110.435	472.6	110.435	472.6	110.436	472.6	123.683	472.697	107.426	472.6	105.979	472.697	107.507	472.6	105.968	472.697	104.433	472.6	105.163	472.697	107.511
473.109	103.141	473.012	109.358	473.109	103.22	473.012	109.365	473.012	106.247	473.012	106.245	473.012	106.245	473.012	106.245	473.012	120.336	473.109	103.542	473.012	101.688	473.109	103.627	473.012	101.694	473.109	100.355	473.012	100.782	473.109	103.632
473.522	106.891	473.424	113.214	473.522	106.968	473.424	113.22	473.424	110.435	473.424	110.433	473.424	110.432	473.424	110.433	473.424	123.85	473.522	107.34	473.424	105.953	473.522	107.422	473.424	105.944	473.522	104.281	473.424	105.12	473.522	107.427
473.934	103.089	473.836	108.441	473.934	103.166	473.836	108.447	473.836	105.413	473.836	105.41	473.836	105.41	473.836	105.411	473.836	119.317	473.934	103.515	473.836	100.896	473.934	103.598	473.836	100.898	473.934	100.417	473.836	100.012	473.934	103.603
474.346	106.432	474.248	112.837	474.346	106.51	474.248	112.843	474.248	109.966	474.248	109.964	474.248	109.964	474.248	109.965	474.248	123.581	474.346	106.858	474.248	105.456	474.346	106.942	474.248	105.451	474.346	103.726	474.248	104.603	474.346	106.947
474.758	103.704	474.66	108.624	474.758	103.78	474.66	108.631	474.66	105.763	474.66	105.761	474.66	105.762	474.66	105.762	474.66	119.311	474.758	104.152	474.66	101.299	474.758	104.233	474.66	101.294	474.758	101.118	474.66	100.453	474.758	104.238
475.17	105.595	475.072	111.995	475.17	105.675	475.072	112.001	475.072	109.01	475.072	109.009	475.072	109.008	475.072	109.01	475.072	122.863	475.17	105.996	475.072	104.468	475.17	106.083	475.072	104.467	475.17	102.78	475.072	103.589	475.17	106.087
475.582	104.498	475.484	109.466	475.582	104.574	475.484	109.473	475.484	106.699	475.484	106.697	475.484	106.697	475.484	106.698	475.484	120.05	475.582	104.952	475.484	102.253	475.582	105.033	475.484	102.244	475.582	101.927	475.484	101.425	475.582	105.037
475.994	104.439	475.896	110.68	475.994	104.519	475.896	110.686	475.896	107.555	475.896	107.553	475.896	107.552	475.896	107.553	475.896	121.695	475.994	104.81	475.896	102.972	475.994	104.899	475.896	102.979	475.994	101.505	475.896	102.062	475.994	104.904
476.406	105.113	476.308	110.294	476.406	105.189	476.308	110.3	476.308	107.526	476.308	107.524	476.308	107.524	476.308	107.525	476.308	120.883	476.406	105.559	476.308	103.071	476.406	105.641	476.308	103.062	476.406	102.505	476.308	102.242	476.406	105.646
476.818	103.123	476.72	108.934	476.818	103.204	476.72	108.94	476.72	105.642	476.72	105.64	476.72	105.639	476.72	105.64	476.72	120.11	476.818	103.468	476.72	101.019	476.818	103.56	476.72	101.034	476.818	100.086	476.72	100.07	476.818	103.564
477.231	105.39	477.132	110.763	477.231	105.467	477.132	110.77	477.132	107.942	477.132	107.94	477.132	107.939	477.132	107.94	477.132	121.422	477.231	105.821	477.132	103.465	477.231	105.904	477.132	103.458	477.231	102.713	477.132	102.623	477.231	105.908
477.643	102.007	477.544	107.017	477.643	102.089	477.544	107.024	477.544	103.598	477.544	103.595	477.544	103.595	477.544	103.596	477.544	118.304	477.643	102.343	477.544	98.9626	477.643	102.435	477.544	98.9817	477.643	98.9454	477.544	97.9863	477.643	102.44
478.055	105.275	477.956	110.765	478.055	105.353	477.956	110.771	477.956	107.855	477.956	107.853	477.956	107.852	477.956	107.854	477.956	121.528	478.055	105.685	477.956	103.349	478.055	105.771	477.956	103.346	478.055	102.507	477.956	102.488	478.055	105.775
478.467	101.552	478.368	105.69	478.467	101.632	478.368	105.695	478.368	102.378	478.368	102.375	478.368	102.376	478.368	102.375	478.368	116.869	478.467	101.906	478.368	97.8156	478.467	101.995	478.368	97.8294	478.467	98.585	478.368	96.8763	478.467	102
478.879	104.751	478.78	110.253	478.879	104.831	478.78	110.259	478.78	107.223	478.78	107.222	478.78	107.221	478.78	107.222	478.78	121.149	478.879	105.135	478.78	102.681	478.879	105.223	478.78	102.684	478.879	101.871	478.78	101.794	478.879	105.228
479.291	101.828	479.192	105.719	479.291	101.907	479.192	105.725	479.192	102.723	479.192	102.72	479.192	102.721	479.192	102.721	479.192	116.567	479.291	102.212	479.192	98.2655	479.291	102.299	479.192	98.2652	479.291	98.9872	479.192	97.4025	479.291	102.303
479.703	103.82	479.604	109.19	479.703	103.901	479.604	109.196	479.604	106.003	479.604	106	479.604	105.999	479.604	106.001	479.604	120.252	479.703	104.17	479.604	101.416	479.703	104.262	479.604	101.426	479.703	100.8	479.604	100.492	479.703	104.267
480.115	102.421	480.016	106.626	480.115	102.499	480.016	106.632	480.016	103.821	480.016	103.818	480.016	103.819	480.016	103.819	480.016	117.252	480.115	102.82	480.016	99.4023	480.115	102.905	480.016	99.3954	480.115	99.6368	480.016	98.5762	480.115	102.91
480.527	102.517	480.428	107.538	480.527	102.6	480.428	107.544	480.428	104.143	480.428	104.14	480.428	104.139	480.428	104.14	480.428	118.805	480.527	102.829	480.428	99.504	480.527	102.924	480.428	99.5233	480.527	99.3324	480.428	98.5316	480.527	102.928
480.94	102.904	480.841	107.498	480.94	102.983	480.841	107.504	480.841	104.718	480.841	104.715	480.841	104.716	480.841	104.716	480.841	118.089	480.94	103.301	480.841	100.293	480.94	103.387	480.841	100.284	480.94	100.102	480.841	99.4687	480.94	103.391
481.352	100.998	481.253	105.352	481.352	101.082	481.253	105.358	481.253	101.732	481.253	101.729	481.253	101.728	481.253	101.729	481.253	116.832	481.352	101.27	481.253	97.0595	481.352	101.368	481.253	97.0877	481.352	97.6524	481.253	96.04	481.352	101.373
481.764	103.053	481.665	107.91	481.764	103.132	481.665	107.916	481.665	105.071	481.665	105.068	481.665	105.069	481.665	105.069	481.665	118.571	481.764	103.433	481.665	100.621	481.764	103.521	481.665	100.615	481.764	100.179	481.665	99.782	481.764	103.526
482.176	99.6507	482.077	103.158	482.176	99.7355	482.077	103.164	482.077	99.5837	482.077	99.5817	482.077	99.5807	482.077	99.5813	482.077	114.64	482.176	99.9051	482.077	95.01	482.176	100.004	482.077	95.0322	482.176	96.2556	482.077	94.0351	482.176	100.009
482.588	102.775	482.489	107.744	482.588	102.855	482.489	107.75	482.489	104.801	482.489	104.798	482.489	104.798	482.489	104.799	482.489	118.524	482.588	103.129	482.489	100.321	482.588	103.22	482.489	100.32	482.588	99.7873	482.489	99.4585	482.588	103.225
483	99.0372	482.901	102.442	483	99.1201	482.901	102.449	482.901	99.5326	482.901	99.5288	482.901	99.5312	482.901	99.5297	482.901	113.326	483	99.3186	482.901	95.1952	483	99.4149	482.901	95.186	483	95.7993	482.901	94.3898	483	99.4195
483.412	102.03	483.313	106.959	483.412	102.112	483.313	106.965	483.313	103.882	483.313	103.879	483.313	103.88	483.313	103.88	483.313	117.885	483.412	102.348	483.313	99.3728	483.412	102.442	483.313	99.3767	483.412	98.8868	483.313	98.483	483.412	102.447
483.824	99.2722	483.725	103.595	483.824	99.352	483.725	103.602	483.725	101.175	483.725	101.172	483.725	101.173	483.725	101.173	483.725	113.833	483.824	99.603	483.725	96.9219	483.824	99.6938	483.725	96.8974	483.824	96.2552	483.725	96.1956	483.824	99.6985
484.237	100.8	484.137	105.535	484.237	100.884	484.137	105.541	484.137	102.322	484.137	102.319	484.137	102.319	484.137	102.319	484.137	116.614	484.237	101.07	484.137	97.7971	484.237	101.169	484.137	97.8064	484.237	97.4547	484.137	96.8837	484.237	101.174
484.649	99.8278	484.549	105.072	484.649	99.9078	484.549	105.079	484.549	102.737	484.549	102.735	484.549	102.736	484.549	102.736	484.549	115.143	484.649	100.186	484.549	98.4704	484.649	100.275	484.549	98.4425	484.649	96.917	484.549	97.7471	484.649	100.279
485.061	99.1421	484.961	103.623	485.061	99.2288	484.961	103.629	484.961	100.406	484.961	100.403	484.961	100.403	484.961	100.403	484.961	114.753	485.061	99.3564	484.961	95.9356	485.061	99.4605	484.961	95.9426	485.061	95.5679	484.961	95.0429	485.061	99.4651
485.473	100.204	485.373	106.054	485.473	100.284	485.373	106.06	485.373	103.666	485.373	103.664	485.373	103.665	485.373	103.664	485.373	116.175	485.473	100.562	485.373	99.3682	485.473	100.65	485.373	99.3436	485.473	97.282	485.373	98.6294	485.473	100.655
485.885	97.354	485.785	102.039	485.885	97.4419	485.785	102.046	485.785	99.305	485.785	99.3024	485.785	99.3038	485.785	99.3037	485.785	112.758	485.885	97.5302	485.785	95.028	485.885	97.6368	485.785	95.0111	485.885	93.6719	485.785	94.2646	485.885	97.6413
486.297	100.149	486.197	106.4	486.297	100.229	486.197	106.406	486.197	103.938	486.197	103.935	486.197	103.936	486.197	103.936	486.197	116.613	486.297	100.487	486.197	99.6147	486.297	100.578	486.197	99.5941	486.297	97.1388	486.197	98.8599	486.297	100.582
486.709	96.2325	486.609	102.325	486.709	96.3158	486.609	102.331	486.609	100.291	486.609	100.289	486.609	100.291	486.609	100.29	486.609	112.12	486.709	96.4587	486.609	96.1562	486.709	96.5573	486.609	96.1159	486.709	92.8743	486.609	95.5092	486.709	96.5618
487.121	99.5603	487.021	106.151	487.121	99.6425	487.021	106.158	487.021	103.638	487.021	103.635	487.021	103.637	487.021	103.637	487.021	116.43	487.121	99.8643	487.021	99.3068	487.121	99.9591	487.021	99.2868	487.121	96.4095	487.021	98.5433	487.121	99.9637
487.533	96.4323	487.433	104.09	487.533	96.5106	487.433	104.096	487.433	102.242	487.433	102.241	487.433	102.242	487.433	102.241	487.433	113.487	487.533	96.7804	487.433	98.0963	487.533	96.8664	487.433	98.0515	487.533	93.6183	487.433	97.4624	487.533	96.871
487.946	98.4092	487.845	105.447	487.946	98.4925	487.845	105.454	487.845	102.958	487.845	102.955	487.845	102.956	487.845	102.956	487.845	115.709	487.946	98.6688	487.845	98.6448	487.946	98.7671	487.845	98.6243	487.946	95.0908	487.845	97.8897	487.946	98.7717
488.358	97.3696	488.257	105.843	488.358	97.4453	488.257	105.85	488.257	103.914	488.257	103.913	488.257	103.914	488.257	103.914	488.257	115.326	488.358	97.7941	488.257	99.7186	488.358	97.8744	488.257	99.6775	488.358	94.8303	488.257	99.0624	488.358	97.8791
488.77	96.7821	488.669	104.652	488.77	96.8668	488.669	104.658	488.669	102.332	488.669	102.329	488.669	102.33	488.669	102.33	488.669	114.715	488.77	97.0067	488.669	98.0759	488.77	97.1069	488.669	98.0486	488.77	93.3786	488.669	97.358	488.77	97.1114
489.182	98.1912	489.081	107.061	489.182	98.2655	489.081	107.068	489.081	105.013	489.081	105.012	489.081	105.013	489.081	105.013	489.081	116.71	489.182	98.6341	489.081	100.776	489.182	98.7126	489.081	100.739	489.182	95.6952	489.081	100.095	489.182	98.7172
489.594	95.2102	489.493	104.458	489.594	95.2919	489.493	104.466	489.493	102.427	489.493	102.425	489.493	102.427	489.493	102.427	489.493	114.123	489.594	95.4814	489.493	98.2381	489.594	95.5757	489.493	98.1994	489.594	92.1396	489.493	97.5718	489.594	95.5802
490.006	98.5278	489.905	107.708	490.006	98.6032	489.905	107.715	489.905	105.563	489.905	105.561	489.905	105.562	489.905	105.562	489.905	117.495	490.006	98.9617	489.905	101.295	490.006	99.042	489.905	101.262	490.006	95.9837	489.905	100.596	490.006	99.0466
490.418	94.9209	490.317	105.329	490.418	94.9926	490.317	105.335	490.317	103.473	490.317	103.471	490.317	103.473	490.317	103.472	490.317	114.708	490.418	95.375	490.317	99.2999	490.418	95.4483	490.317	99.2565	490.418	92.6438	490.317	98.6578	490.418	95.4528
490.83	98.3011	490.729	107.865	490.83	98.3776	490.729	107.872	490.729	105.657	490.729	105.656	490.729	105.657	490.729	105.657	490.729	117.737	490.83	98.7192	490.729	101.374	490.83	98.8006	490.729	101.343	490.83	95.6974	490.729	100.663	490.83	98.8052
491.243	96.1951	491.141	106.799	491.243	96.2616	491.141	106.806	491.141	104.927	491.141	104.925	491.141	104.926	491.141	104.926	491.141	116.198	491.243	96.7826	491.141	100.726	491.243	96.8463	491.141	100.684	491.243	94.3525	491.141	100.076	491.243	96.8509
491.655	97.5679	491.553	107.674	491.655	97.6444	491.553	107.681	491.553	105.454	491.553	105.452	491.553	105.453	491.553	105.453	491.553	117.563	491.655	97.9803	491.553	101.17	491.655	98.0615	491.553	101.139	491.655	94.9685	491.553	100.456	491.655	98.0661
492.067	97.8218	491.965	108.219	492.067	97.8882	491.965	108.226	491.965	106.248	491.965	106.246	491.965	106.247	491.965	106.248	491.965	117.772	492.067	98.4342	491.965	102.01	492.067	98.4972	491.965	101.971	492.067	96.0015	491.965	101.34	492.067	98.5018
492.479	96.6054	492.377	107.39	492.479	96.6787	492.377	107.397	492.377	105.219	492.377	105.217	492.377	105.218	492.377	105.218	492.377	117.213	492.479	97.0543	492.377	100.949	492.479	97.1306	492.377	100.917	492.479	94.2035	492.377	100.245	492.479	97.1352
492.891	99.0575	492.789	109.29	492.891	99.1257	492.789	109.297	492.789	107.212	492.789	107.211	492.789	107.211	492.789	107.212	492.789	119.003	492.891	99.6532	492.789	102.94	492.891	99.7181	492.789	102.905	492.891	97.1352	492.789	102.25	492.891	99.7227
493.303	96.1421	493.201	107.392	493.303	96.2097	493.201	107.399	493.201	105.311	493.201	105.31	493.201	105.31	493.201	105.311	493.201	117.09	493.303	96.7001	493.201	101.06	493.303	96.7657	493.201	101.026	493.303	94.1869	493.201	100.373	493.303	96.7703
493.715	99.7403	493.614	109.943	493.715	99.81	493.614	109.95	493.614	107.772	493.614	107.771	493.614	107.772	493.614	107.772	493.614	119.786	493.715	100.31	493.614	103.475	493.715	100.378	493.614	103.443	493.715	97.705	493.614	102.767	493.715	100.383
494.127	96.9062	494.026	107.963	494.127	96.9693	494.026	107.969	494.026	105.944	494.026	105.942	494.026	105.943	494.026	105.944	494.026	117.578	494.127	97.5707	494.026	101.699	494.127	97.6274	494.026	101.662	494.127	95.3049	494.026	101.021	494.127	97.6321
494.539	99.8886	494.438	110.193	494.539	99.9588	494.438	110.2	494.438	107.951	494.438	107.95	494.438	107.951	494.438	107.951	494.438	120.132	494.539	100.438	494.438	103.635	494.539	100.507	494.438	103.606	494.539	97.7689	494.438	102.914	494.539	100.512
494.952	98.5173	494.85	108.997	494.952	98.5806	494.85	109.004	494.85	106.967	494.85	106.965	494.85	106.966	494.85	106.967	494.85	118.643	494.952	99.2068	494.85	102.707	494.952	99.2629	494.85	102.67	494.952	96.9502	494.85	102.026	494.952	99.2676
495.364	99.5966	495.262	110.104	495.364	99.6677	495.262	110.111	495.262	107.817	495.262	107.816	495.262	107.816	495.262	107.817	495.262	120.1	495.364	100.138	495.262	103.491	495.364	100.208	495.262	103.463	495.364	97.4504	495.262	102.761	495.364	100.213
495.776	100.143	495.674	110.143	495.776	100.209	495.674	110.15	495.674	108.048	495.674	108.047	495.674	108.047	495.674	108.048	495.674	119.891	495.776	100.81	495.674	103.765	495.776	100.869	495.674	103.73	495.776	98.4562	495.674	103.071	495.776	100.874
496.188	99.0914	496.086	109.809	496.188	99.1609	496.086	109.816	496.086	107.512	496.086	107.51	496.086	107.511	496.086	107.512	496.086	119.816	496.188	99.6471	496.086	103.186	496.188	99.7157	496.086	103.159	496.188	97.0158	496.086	102.454	496.188	99.7204
496.6	101.396	496.498	111.124	496.6	101.463	496.498	111.131	496.498	108.949	496.498	108.947	496.498	108.948	496.498	108.949	496.498	120.993	496.6	102.029	496.498	104.639	496.6	102.092	496.498	104.607	496.6	99.564	496.498	103.93	496.6	102.096
497.012	98.8232	496.91	109.542	497.012	98.8903	496.91	109.549	496.91	107.275	496.91	107.273	496.91	107.274	496.91	107.274	496.91	119.507	497.012	99.4249	496.91	102.958	497.012	99.4888	496.91	102.93	497.012	96.9277	496.91	102.232	497.012	99.4935
497.424	102.178	497.322	111.806	497.424	102.248	497.322	111.812	497.322	109.55	497.322	109.549	497.322	109.55	497.322	109.55	497.322	121.785	497.424	102.78	497.322	105.218	497.424	102.846	497.322	105.189	497.424	100.216	497.322	104.494	497.424	102.85
497.836	99.2957	497.734	109.604	497.836	99.3614	497.734	109.611	497.734	107.389	497.734	107.388	497.734	107.389	497.734	107.389	497.734	119.502	497.836	99.947	497.734	103.084	497.836	100.007	497.734	103.054	497.836	97.5701	497.734	102.368	497.836	100.011
498.248	102.5	498.146	112.144	498.248	102.57	498.146	112.151	498.146	109.817	498.146	109.816	498.146	109.816	498.146	109.817	498.146	122.219	498.248	103.074	498.146	105.465	498.248	103.143	498.146	105.439	498.248	100.43	498.146	104.726	498.248	103.147
498.661	100.491	498.558	110.157	498.661	100.556	498.558	110.164	498.558	107.971	498.558	107.97	498.558	107.97	498.558	107.971	498.558	120.023	498.661	101.158	498.558	103.667	498.661	101.217	498.558	103.636	498.661	98.7951	498.558	102.956	498.661	101.222
499.073	102.401	498.97	112.14	499.073	102.472	498.97	112.147	498.97	109.752	498.97	109.75	498.97	109.751	498.97	109.751	498.97	122.291	499.073	102.954	498.97	105.385	499.073	103.025	498.97	105.361	499.073	100.252	498.97	104.634	499.073	103.03
499.485	101.92	499.382	111.06	499.485	101.986	499.382	111.066	499.382	108.857	499.382	108.856	499.382	108.856	499.382	108.857	499.382	120.962	499.485	102.57	499.382	104.541	499.485	102.631	499.382	104.511	499.485	100.143	499.382	103.827	499.485	102.636
499.897	101.973	499.794	111.832	499.897	102.044	499.794	111.839	499.794	109.398	499.794	109.397	499.794	109.397	499.794	109.398	499.794	122.036	499.897	102.516	499.794	105.021	499.897	102.587	499.794	104.999	499.897	99.7902	499.794	104.261	499.897	102.592
500.309	103.176	500.206	112.024	500.309	103.244	500.206	112.031	500.206	109.771	500.206	109.769	500.206	109.77	500.206	109.77	500.206	122.006	500.309	103.799	500.206	105.437	500.309	103.863	500.206	105.408	500.309	101.284	500.206	104.712	500.309	103.868
500.721	101.432	500.618	111.326	500.721	101.503	500.618	111.333	500.618	108.873	500.618	108.871	500.618	108.872	500.618	108.873	500.618	121.548	500.721	101.982	500.618	104.495	500.721	102.053	500.618	104.473	500.721	99.2845	500.618	103.731	500.721	102.057
501.133	104.09	501.03	112.829	501.133	104.16	501.03	112.836	501.03	110.51	501.03	110.509	501.03	110.509	501.03	110.51	501.03	122.903	501.133	104.685	501.03	106.156	501.133	104.752	501.03	106.129	501.133	102.082	501.03	105.419	501.133	104.757
501.545	101.172	501.442	110.836	501.545	101.242	501.442	110.843	501.442	108.401	501.442	108.399	501.442	108.4	501.442	108.401	501.442	121.029	501.545	101.749	501.442	104.031	501.545	101.817	501.442	104.009	501.545	99.132	501.442	103.271	501.545	101.822
501.958	104.609	501.854	113.354	501.958	104.68	501.854	113.361	501.854	110.968	501.854	110.966	501.854	110.966	501.854	110.967	501.854	123.521	501.958	105.178	501.854	106.593	501.958	105.247	501.854	106.569	501.958	102.495	501.854	105.842	501.958	105.252
502.37	101.572	502.266	110.672	502.37	101.641	502.266	110.678	502.266	108.288	502.266	108.286	502.266	108.287	502.266	108.288	502.266	120.799	502.37	102.179	502.266	103.932	502.37	102.244	502.266	103.908	502.37	99.6388	502.266	103.183	502.37	102.249
502.782	104.727	502.678	113.552	502.782	104.799	502.678	113.558	502.678	111.098	502.678	111.097	502.678	111.097	502.678	111.098	502.678	123.803	502.782	105.272	502.678	106.705	502.782	105.344	502.678	106.683	502.782	102.518	502.678	105.941	502.782	105.348
503.194	102.595	503.09	111.049	503.194	102.663	503.09	111.056	503.09	108.711	503.09	108.71	503.09	108.71	503.09	108.711	503.09	121.124	503.194	103.211	503.09	104.363	503.194	103.276	503.09	104.337	503.194	100.682	503.09	103.622	503.194	103.28
503.606	104.464	503.502	113.406	503.606	104.536	503.502	113.413	503.502	110.889	503.502	110.887	503.502	110.887	503.502	110.888	503.502	123.734	503.606	104.988	503.502	106.479	503.606	105.062	503.502	106.46	503.606	102.175	503.502	105.702	503.606	105.066
504.018	103.828	503.914	111.852	504.018	103.897	503.914	111.859	503.914	109.518	503.914	109.517	503.914	109.517	503.914	109.518	503.914	121.933	504.018	104.433	503.914	105.166	504.018	104.499	503.914	105.14	504.018	101.86	503.914	104.426	504.018	104.504
504.43	103.877	504.326	112.93	504.43	103.95	504.326	112.937	504.326	110.355	504.326	110.353	504.326	110.353	504.326	110.354	504.326	123.323	504.43	104.386	504.326	105.932	504.43	104.461	504.326	105.915	504.43	101.533	504.326	105.143	504.43	104.466
504.842	104.925	504.738	112.772	504.842	104.995	504.738	112.779	504.738	110.404	504.738	110.403	504.738	110.403	504.738	110.404	504.738	122.909	504.842	105.509	504.738	106.037	504.842	105.578	504.738	106.012	504.842	102.869	504.738	105.29	504.842	105.582
505.254	103.125	505.15	112.188	505.254	103.198	505.15	112.194	505.15	109.57	505.15	109.568	505.15	109.568	505.15	109.569	505.15	122.623	505.254	103.63	505.15	105.139	505.254	103.705	505.15	105.124	505.254	100.775	505.15	104.341	505.254	103.71
505.667	105.72	505.562	113.556	505.667	105.792	505.562	113.562	505.562	111.132	505.562	111.131	505.562	111.131	505.562	111.132	505.562	123.771	505.667	106.281	505.562	106.747	505.667	106.352	505.562	106.724	505.667	103.57	505.562	105.989	505.667	106.357
506.079	102.554	505.974	111.355	506.079	102.627	505.974	111.362	505.974	108.73	505.974	108.729	505.974	108.729	505.974	108.73	505.974	121.79	506.079	103.076	505.974	104.304	506.079	103.149	505.974	104.289	506.079	100.275	505.974	103.504	506.079	103.154
506.491	106.15	506.386	114.063	506.491	106.223	506.386	114.069	506.386	111.576	506.386	111.574	506.386	111.574	506.386	111.575	506.386	124.363	506.491	106.688	506.386	107.17	506.491	106.761	506.386	107.15	506.491	103.907	506.386	106.399	506.491	106.766
506.903	102.611	506.799	110.782	506.903	102.682	506.799	110.789	506.799	108.205	506.799	108.203	506.799	108.203	506.799	108.204	506.799	121.152	506.903	103.161	506.799	103.796	506.903	103.232	506.799	103.78	506.903	100.445	506.799	103.007	506.903	103.237
507.315	106.194	507.211	114.23	507.315	106.267	507.211	114.237	507.211	111.675	507.211	111.673	507.211	111.673	507.211	111.674	507.211	124.616	507.315	106.71	507.211	107.25	507.315	106.785	507.211	107.232	507.315	103.86	507.211	106.465	507.315	106.79
507.727	103.397	507.623	110.846	507.727	103.468	507.623	110.852	507.623	108.347	507.623	108.345	507.623	108.345	507.623	108.346	507.623	121.121	507.727	103.967	507.623	103.959	507.727	104.036	507.623	103.939	507.727	101.296	507.623	103.186	507.727	104.041
508.139	105.851	508.035	114.029	508.139	105.925	508.035	114.036	508.035	111.402	508.035	111.4	508.035	111.4	508.035	111.401	508.035	124.502	508.139	106.344	508.035	106.957	508.139	106.422	508.035	106.942	508.139	103.428	508.035	106.157	508.139	106.426
508.551	104.54	508.447	111.551	508.551	104.61	508.447	111.558	508.447	109.097	508.447	109.095	508.447	109.095	508.447	109.096	508.447	121.779	508.551	105.107	508.447	104.715	508.551	105.177	508.447	104.694	508.551	102.422	508.447	103.951	508.551	105.182
508.964	105.138	508.859	113.444	508.964	105.213	508.859	113.45	508.859	110.74	508.859	110.738	508.859	110.738	508.859	110.739	508.859	124.002	508.964	105.61	508.859	106.276	508.964	105.689	508.859	106.264	508.964	102.633	508.859	105.46	508.964	105.694
509.376	105.625	509.271	112.522	509.376	105.697	509.271	112.529	509.271	110.058	509.271	110.057	509.271	110.057	509.271	110.058	509.271	122.774	509.376	106.179	509.271	105.668	509.376	106.251	509.271	105.646	509.376	103.445	509.271	104.901	509.376	106.255
509.788	104.144	509.683	112.486	509.788	104.22	509.683	112.493	509.683	109.707	509.683	109.705	509.683	109.705	509.683	109.706	509.683	123.124	509.788	104.602	509.683	105.225	509.788	104.682	509.683	105.216	509.788	101.584	509.683	104.392	509.788	104.687
510.2	106.436	510.095	113.399	510.2	106.509	510.095	113.405	510.095	110.89	510.095	110.889	510.095	110.889	510.095	110.89	510.095	123.718	510.2	106.971	510.095	106.482	510.2	107.044	510.095	106.463	510.2	104.176	510.095	105.707	510.2	107.049
510.612	103.142	510.507	111.255	510.612	103.217	510.507	111.261	510.507	108.417	510.507	108.415	510.507	108.414	510.507	108.415	510.507	121.947	510.612	103.599	510.507	103.925	510.612	103.679	510.507	103.92	510.612	100.594	510.507	103.08	510.612	103.684
511.024	106.888	510.919	113.99	511.024	106.962	510.919	113.997	510.919	111.419	510.919	111.418	510.919	111.418	510.919	111.419	510.919	124.393	511.024	107.401	510.919	106.991	511.024	107.477	510.919	106.974	511.024	104.54	510.919	106.203	511.024	107.482
511.436	102.659	511.331	110.075	511.436	102.733	511.331	110.082	511.331	107.245	511.331	107.242	511.331	107.242	511.331	107.243	511.331	120.744	511.436	103.143	511.331	102.767	511.436	103.22	511.331	102.761	511.436	100.226	511.331	101.924	511.436	103.225
511.848	106.944	511.743	114.212	511.848	107.019	511.743	114.218	511.743	111.569	511.743	111.567	511.743	111.567	511.743	111.568	511.743	124.707	511.848	107.436	511.743	107.118	511.848	107.513	511.743	107.104	511.848	104.504	511.743	106.315	511.848	107.518
512.26	103.104	512.155	109.573	512.26	103.177	512.155	109.579	512.155	106.855	512.155	106.853	512.155	106.853	512.155	106.854	512.155	120.102	512.26	103.622	512.155	102.416	512.26	103.696	512.155	102.406	512.26	100.804	512.155	101.599	512.26	103.701
512.673	106.587	512.567	114.022	512.673	106.663	512.567	114.028	512.567	111.296	512.567	111.295	512.567	111.294	512.567	111.295	512.567	124.616	512.673	107.054	512.567	106.821	512.673	107.134	512.567	106.81	512.673	104.048	512.567	106	512.673	107.139
513.085	104.2	512.979	110.113	513.085	104.272	512.979	110.119	512.979	107.522	512.979	107.521	512.979	107.521	512.979	107.522	512.979	120.493	513.085	104.732	512.979	103.115	513.085	104.806	512.979	103.099	513.085	101.946	512.979	102.324	513.085	104.81
513.497	105.801	513.391	113.383	513.497	105.878	513.391	113.389	513.391	110.561	513.391	110.559	513.391	110.559	513.391	110.56	513.391	124.088	513.497	106.241	513.391	106.058	513.497	106.324	513.391	106.051	513.497	103.154	513.391	105.216	513.497	106.329
513.909	105.386	513.803	111.249	513.909	105.459	513.803	111.255	513.803	108.7	513.803	108.698	513.803	108.698	513.803	108.699	513.803	121.591	513.909	105.913	513.803	104.294	513.909	105.987	513.803	104.276	513.909	103.1	513.803	103.511	513.909	105.992
514.321	104.601	514.215	112.254	514.321	104.679	514.215	112.26	514.215	109.315	514.215	109.313	514.215	109.313	514.215	109.314	514.215	123.084	514.321	105.013	514.215	104.781	514.321	105.098	514.215	104.778	514.321	101.842	514.215	103.913	514.321	105.103
514.733	106.321	514.627	112.361	514.733	106.395	514.627	112.367	514.627	109.783	514.627	109.781	514.627	109.781	514.627	109.782	514.627	122.752	514.733	106.832	514.627	105.361	514.733	106.908	514.627	105.345	514.733	103.966	514.627	104.571	514.733	106.913
515.145	103.124	515.039	110.615	515.145	103.203	515.039	110.621	515.039	107.536	515.039	107.534	515.039	107.533	515.039	107.534	515.039	121.583	515.145	103.513	515.039	102.967	515.145	103.6	515.039	102.972	515.145	100.282	515.039	102.068	515.145	103.605
515.557	106.878	515.451	113.146	515.557	106.953	515.451	113.153	515.451	110.506	515.451	110.504	515.451	110.504	515.451	110.506	515.451	123.625	515.557	107.37	515.451	106.061	515.557	107.448	515.451	106.047	515.557	104.439	515.451	105.258	515.557	107.453
515.969	101.874	515.863	108.612	515.969	101.952	515.863	108.618	515.863	105.413	515.863	105.411	515.863	105.41	515.863	105.411	515.863	119.684	515.969	102.27	515.863	100.828	515.969	102.356	515.863	100.838	515.969	99.0801	515.863	99.9016	515.969	102.36
516.382	107.012	516.275	113.498	516.382	107.088	516.275	113.504	516.275	110.777	516.275	110.775	516.275	110.775	516.275	110.776	516.275	124.081	516.382	107.481	516.275	106.306	516.382	107.561	516.275	106.295	516.382	104.478	516.275	105.486	516.382	107.566
516.794	101.711	516.687	107.032	516.794	101.786	516.687	107.038	516.687	103.925	516.687	103.922	516.687	103.922	516.687	103.923	516.687	117.989	516.794	102.158	516.687	99.3999	516.794	102.238	516.687	99.4052	516.794	99.1371	516.687	98.5011	516.794	102.243
517.206	106.695	517.099	113.372	517.206	106.772	517.099	113.379	517.099	110.553	517.099	110.552	517.099	110.551	517.099	110.553	517.099	124.074	517.206	107.137	517.099	106.051	517.206	107.22	517.099	106.044	517.206	104.05	517.099	105.211	517.206	107.225
517.618	102.761	517.511	107.22	517.618	102.835	517.511	107.226	517.511	104.456	517.511	104.454	517.511	104.454	517.511	104.454	517.511	117.792	517.618	103.253	517.511	100.034	517.618	103.329	517.511	100.025	517.618	100.357	517.511	99.2126	517.618	103.334
518.03	105.886	517.923	112.719	518.03	105.965	517.923	112.725	517.923	109.778	517.923	109.776	517.923	109.775	517.923	109.777	517.923	123.561	518.03	106.297	517.923	105.239	518.03	106.383	517.923	105.236	518.03	103.11	517.923	104.371	518.03	106.388
518.442	104.188	518.335	108.809	518.442	104.262	518.335	108.816	518.335	106.221	518.335	106.219	518.335	106.22	518.335	106.22	518.335	119.176	518.442	104.689	518.335	101.827	518.442	104.766	518.335	101.811	518.442	101.807	518.335	101.038	518.442	104.77
518.854	104.534	518.747	111.452	518.854	104.615	518.747	111.458	518.747	108.346	518.747	108.344	518.747	108.344	518.747	108.345	518.747	122.473	518.854	104.904	518.747	103.758	518.854	104.994	518.747	103.763	518.854	101.589	518.747	102.853	518.854	104.999
519.266	105.381	519.159	110.445	519.266	105.456	519.159	110.452	519.159	107.848	519.159	107.847	519.159	107.847	519.159	107.848	519.159	120.837	519.266	105.871	519.159	103.435	519.266	105.949	519.159	103.419	519.266	102.946	519.159	102.642	519.266	105.954
519.679	102.606	519.571	109.413	519.679	102.689	519.571	109.419	519.571	106.057	519.571	106.056	519.571	106.055	519.571	106.056	519.571	120.684	519.679	102.925	519.571	101.397	519.679	103.019	519.571	101.412	519.679	99.4475	519.571	100.432	519.679	103.024
520.091	106.138	519.984	111.589	520.091	106.213	519.984	111.595	519.984	108.917	519.984	108.915	519.984	108.914	519.984	108.915	519.984	122.087	520.091	106.608	519.984	104.472	520.091	106.688	519.984	104.46	520.091	103.616	519.984	103.662	520.091	106.693
520.503	100.335	520.396	106.36	520.503	100.419	520.396	106.366	520.396	102.592	520.396	102.589	520.396	102.588	520.396	102.589	520.396	117.999	520.503	100.606	520.396	97.8196	520.503	100.705	520.396	97.8558	520.503	97.0004	520.396	96.7498	520.503	100.709
520.915	106.408	520.808	112.148	520.915	106.485	520.808	112.155	520.808	109.373	520.808	109.371	520.808	109.371	520.808	109.372	520.808	122.779	520.915	106.854	520.808	104.893	520.915	106.937	520.808	104.884	520.915	103.783	520.808	104.062	520.915	106.941
521.327	98.964	521.22	102.534	521.327	99.0453	521.22	102.54	521.22	98.4446	521.22	98.4401	521.22	98.4405	521.22	98.4398	521.22	114.456	521.327	99.2813	521.22	93.696	521.327	99.3736	521.22	93.7444	521.327	95.8869	521.22	92.5798	521.327	99.3782
521.739	106.168	521.632	112.113	521.739	106.247	521.632	112.119	521.632	109.212	521.632	109.21	521.632	109.209	521.632	109.211	521.632	122.896	521.739	106.586	521.632	104.691	521.739	106.671	521.632	104.687	521.739	103.419	521.632	103.831	521.739	106.676
522.151	99.9311	522.044	102.032	522.151	100.007	522.044	102.039	522.044	99.314	522.044	99.3103	522.044	99.3124	522.044	99.3122	522.044	112.716	522.151	100.37	522.044	95.0335	522.151	100.451	522.044	95.017	522.151	97.3592	522.044	94.269	522.151	100.456
522.563	105.369	522.456	111.439	522.563	105.449	522.456	111.445	522.456	108.376	522.456	108.374	522.456	108.373	522.456	108.374	522.456	122.409	522.563	105.749	522.456	103.803	522.563	105.838	522.456	103.806	522.563	102.461	522.456	102.907	522.563	105.843
522.975	101.947	522.868	105.419	522.975	102.021	522.868	105.426	522.868	103.141	522.868	103.139	522.868	103.14	522.868	103.14	522.868	115.401	522.975	102.431	522.868	98.8724	522.975	102.509	522.868	98.8431	522.975	99.5229	522.868	98.1553	522.975	102.513
523.388	103.906	523.28	110.004	523.388	103.989	523.28	110.011	523.28	106.705	523.28	106.704	523.28	106.703	523.28	106.704	523.28	121.227	523.388	104.234	523.28	102.058	523.388	104.328	523.28	102.071	523.388	100.774	523.28	101.107	523.388	104.333
523.8	103.643	523.692	108.17	523.8	103.717	523.692	108.176	523.692	105.775	523.692	105.773	523.692	105.774	523.692	105.775	523.692	118.291	523.8	104.121	523.692	101.437	523.8	104.2	523.692	101.414	523.8	101.173	523.692	100.688	523.8	104.204
524.212	101.575	524.104	107.5	524.212	101.662	524.104	107.507	524.104	103.79	524.104	103.789	524.104	103.787	524.104	103.789	524.104	119.128	524.212	101.82	524.104	99.0077	524.212	101.923	524.104	99.0394	524.212	98.0806	524.104	97.9536	524.212	101.927
524.624	104.723	524.516	109.831	524.624	104.799	524.516	109.838	524.516	107.274	524.516	107.273	524.516	107.273	524.516	107.274	524.516	120.169	524.624	105.18	524.516	102.877	524.624	105.261	524.516	102.86	524.624	102.151	524.516	102.093	524.624	105.265
525.036	98.056	524.928	103.06	525.036	98.1479	524.928	103.065	524.928	98.3214	524.928	98.3178	524.928	98.3136	524.928	98.3161	524.928	115.542	525.036	98.1483	524.928	93.1662	525.036	98.2648	524.928	93.2561	525.036	93.8813	524.928	91.8053	525.036	98.2694
525.448	105.185	525.34	110.607	525.448	105.263	525.34	110.614	525.34	107.885	525.34	107.884	525.34	107.884	525.34	107.885	525.34	121.154	525.448	105.612	525.34	103.434	525.448	105.696	525.34	103.423	525.448	102.484	525.34	102.615	525.448	105.701
525.86	93.9564	525.752	92.8182	525.86	94.0526	525.752	92.8223	525.752	81.7971	525.752	81.779	525.752	81.7854	525.752	81.7728	525.752	108.493	525.86	93.9311	525.752	76.9958	525.86	94.0556	525.752	77.0951	525.86	89.4869	525.752	76.6323	525.86	94.06
526.272	105.035	526.164	110.606	526.272	105.114	526.164	110.612	526.164	107.701	526.164	107.699	526.164	107.699	526.164	107.7	526.164	121.371	526.272	105.426	526.164	103.192	526.272	105.514	526.164	103.189	526.272	102.179	526.164	102.332	526.272	105.518
526.685	95.1211	526.576	97.2868	526.685	95.1945	526.576	97.2949	526.576	97.265	526.576	97.2641	526.576	97.2673	526.576	97.267	526.576	103.624	526.685	95.5662	526.576	93.5436	526.685	95.6425	526.576	93.4429	526.685	92.7778	526.576	93.1952	526.685	95.6471
527.097	104.23	526.988	109.807	527.097	104.312	526.988	109.814	526.988	106.667	526.988	106.665	526.988	106.665	526.988	106.666	526.988	120.834	527.097	104.575	526.988	102.086	527.097	104.668	526.988	102.093	527.097	101.174	526.988	101.172	527.097	104.673
527.509	98.9489	527.4	104.396	527.509	99.0186	527.4	104.403	527.4	102.956	527.4	102.954	527.4	102.956	527.4	102.956	527.4	113.115	527.509	99.4938	527.4	98.8591	527.509	99.5632	527.4	98.8015	527.509	96.8257	527.4	98.284	527.509	99.5678
527.921	102.63	527.812	108.027	527.921	102.715	527.812	108.033	527.812	104.524	527.812	104.521	527.812	104.52	527.812	104.522	527.812	119.427	527.921	102.908	527.812	99.8264	527.921	103.007	527.812	99.8496	527.921	99.2766	527.812	98.8249	527.921	103.012
528.333	101.559	528.224	107.732	528.333	101.631	528.224	107.739	528.224	105.777	528.224	105.775	528.224	105.777	528.224	105.777	528.224	117.264	528.333	102.074	528.224	101.54	528.333	102.148	528.224	101.5	528.333	99.2614	528.224	100.873	528.333	102.152
528.745	99.8729	528.636	104.7	528.745	99.9634	528.636	104.705	528.636	100.445	528.636	100.442	528.636	100.44	528.636	100.442	528.636	116.787	528.745	100.031	528.636	95.4849	528.745	100.142	528.636	95.5463	528.745	95.9771	528.636	94.277	528.745	100.147
529.157	103.058	529.048	109.482	529.157	103.133	529.048	109.489	529.048	107.228	529.048	107.227	529.048	107.228	529.048	107.228	529.048	119.435	529.157	103.531	529.048	102.909	529.157	103.61	529.048	102.88	529.157	100.569	529.048	102.185	529.157	103.614
529.569	94.8653	529.46	97.6071	529.569	94.9707	529.46	97.6123	529.46	90.2809	529.46	90.2781	529.46	90.2695	529.46	90.2751	529.46	111.73	529.569	94.7099	529.46	83.7689	529.569	94.8544	529.46	84.0436	529.569	89.4282	529.46	81.2769	529.569	94.859
529.981	103.695	529.872	110.205	529.981	103.772	529.872	110.212	529.872	107.722	529.872	107.72	529.872	107.721	529.872	107.722	529.872	120.458	529.981	104.123	529.872	103.34	529.981	104.207	529.872	103.319	529.981	101.01	529.872	102.57	529.981	104.211
530.394	81.2699	530.284	90.7846	530.394	81.476	530.284	90.7951	530.284	94.0109	530.284	94.0124	530.284	94.0164	530.284	94.0166	530.284	97.8873	530.394	78.1027	530.284	90.636	530.394	78.5801	530.284	90.4613	530.394	74.3299	530.284	90.6211	530.394	78.5834
530.806	103.57	530.696	110.065	530.806	103.649	530.696	110.071	530.696	107.359	530.696	107.357	530.696	107.357	530.696	107.358	530.696	120.587	530.806	103.947	530.696	102.916	530.806	104.035	530.696	102.905	530.806	100.664	530.696	102.1	530.806	104.04
531.218	91.5808	531.108	102.67	531.218	91.6231	531.108	102.679	531.108	102.01	531.108	102.01	531.108	102.013	531.108	102.013	531.108	110.1	531.218	92.7147	531.108	98.032	531.218	92.727	531.108	97.9486	531.218	91.71	531.108	97.5756	531.218	92.7317
531.63	102.65	531.52	109.013	531.63	102.733	531.52	109.02	531.52	106.037	531.52	106.035	531.52	106.035	531.52	106.036	531.52	119.841	531.63	102.961	531.52	101.522	531.63	103.056	531.52	101.522	531.63	99.4553	531.52	100.648	531.63	103.061
532.042	97.8822	531.932	107.241	532.042	97.9426	531.932	107.249	531.932	105.749	531.932	105.748	531.932	105.749	531.932	105.75	531.932	116.14	532.042	98.6519	531.932	101.593	532.042	98.701	531.932	101.537	532.042	96.5937	531.932	101.006	532.042	98.7057
532.454	100.731	532.344	106.743	532.454	100.82	532.344	106.75	532.344	103.334	532.344	103.333	532.344	103.332	532.344	103.333	532.344	118.014	532.454	100.943	532.344	98.7069	532.454	101.049	532.344	98.725	532.454	97.0851	532.344	97.7339	532.454	101.053
532.866	100.911	532.756	109.732	532.866	100.977	532.756	109.739	532.756	107.853	532.756	107.852	532.756	107.853	532.756	107.853	532.756	119.211	532.866	101.543	532.756	103.607	532.866	101.606	532.756	103.564	532.866	99.0735	532.756	102.953	532.866	101.61
533.278	97.2188	533.169	102.207	533.278	97.3157	533.169	102.212	533.169	97.7422	533.169	97.737	533.169	97.7356	533.169	97.7357	533.169	114.421	533.278	97.2323	533.169	92.8379	533.278	97.3586	533.169	92.9094	533.278	92.6399	533.169	91.6005	533.278	97.3632
533.69	102.475	533.581	111.083	533.69	102.546	533.581	111.09	533.581	108.958	533.581	108.957	533.581	108.957	533.581	108.958	533.581	120.9	533.69	103.024	533.581	104.653	533.69	103.096	533.581	104.618	533.69	100.3	533.581	103.953	533.69	103.101
534.103	89.8445	533.993	88.3336	534.103	89.9714	533.993	88.3381	533.993	84.0968	533.993	84.0896	533.993	84.1109	533.993	84.0921	533.993	105.773	534.103	89.2918	533.993	82.2869	534.103	89.4822	533.993	82.0117	534.103	82.8898	533.993	82.8867	534.103	89.4869
534.515	103.056	534.405	111.593	534.515	103.131	534.405	111.6	534.405	109.277	534.405	109.275	534.405	109.276	534.405	109.277	534.405	121.658	534.515	103.538	534.405	104.925	534.515	103.616	534.405	104.898	534.515	100.605	534.405	104.188	534.515	103.621
534.927	86.5571	534.817	99.2165	534.927	86.5583	534.817	99.2246	534.817	99.3862	534.817	99.3859	534.817	99.3888	534.817	99.3887	534.817	104.764	534.927	88.6531	534.817	95.5642	534.927	88.5939	534.817	95.459	534.927	89.3394	534.817	95.2199	534.927	88.5991
535.339	102.78	535.229	111.343	535.339	102.858	535.229	111.349	535.229	108.849	535.229	108.848	535.229	108.848	535.229	108.849	535.229	121.623	535.339	103.194	535.229	104.454	535.339	103.279	535.229	104.434	535.339	100.044	535.229	103.682	535.339	103.284
535.751	96.0315	535.641	106.165	535.751	96.0774	535.641	106.172	535.641	104.923	535.641	104.923	535.641	104.923	535.641	104.924	535.641	114.725	535.751	97.0997	535.641	100.811	535.751	97.1233	535.641	100.746	535.751	95.7233	535.641	100.267	535.751	97.1281
536.163	101.579	536.053	110.268	536.163	101.661	536.053	110.275	536.053	107.581	536.053	107.579	536.053	107.579	536.053	107.58	536.053	120.772	536.163	101.905	536.053	103.14	536.163	101.999	536.053	103.129	536.163	98.4727	536.053	102.328	536.163	102.003
536.575	100.229	536.465	109.69	536.575	100.289	536.465	109.697	536.465	107.969	536.465	107.968	536.465	107.969	536.465	107.97	536.465	118.994	536.575	101.036	536.465	103.749	536.575	101.084	536.465	103.699	536.575	99.014	536.465	103.123	536.575	101.089
536.987	99.0952	536.877	108.116	536.987	99.1838	536.877	108.122	536.877	105.176	536.877	105.174	536.877	105.174	536.877	105.174	536.877	118.893	536.987	99.2759	536.877	100.685	536.987	99.3835	536.877	100.683	536.987	95.3458	536.877	99.8208	536.987	99.3882
537.4	102.534	537.289	111.774	537.4	102.599	537.289	111.781	537.289	109.791	537.289	109.79	537.289	109.791	537.289	109.792	537.289	121.443	537.4	103.22	537.289	105.508	537.4	103.278	537.289	105.468	537.4	100.868	537.289	104.835	537.4	103.283
537.812	94.0908	537.701	104.23	537.812	94.1966	537.701	104.237	537.701	100.961	537.701	100.958	537.701	100.958	537.701	100.958	537.701	115.377	537.812	93.8888	537.701	96.4478	537.812	94.0362	537.701	96.4588	537.812	88.4482	537.701	95.5301	537.812	94.0408
538.224	103.743	538.113	112.953	538.224	103.813	538.113	112.96	538.113	110.789	538.113	110.788	538.113	110.789	538.113	110.79	538.113	122.858	538.224	104.351	538.113	106.463	538.224	104.418	538.113	106.429	538.224	101.779	538.113	105.756	538.224	104.422
538.636	75.1975	538.525	98.3313	538.636	75.5441	538.525	98.3379	538.525	96.3888	538.525	96.3857	538.525	96.3896	538.525	96.387	538.525	108.645	538.636	71.2786	538.525	92.4304	538.636	71.603	538.525	92.3756	538.636	79.9562	538.525	91.8721	538.636	71.6099
539.048	104.119	538.937	113.423	539.048	104.19	538.937	113.43	538.937	111.114	538.937	111.113	538.937	111.113	538.937	111.114	538.937	123.511	539.048	104.664	538.937	106.751	539.048	104.737	538.937	106.724	539.048	101.911	538.937	106.016	539.048	104.741
539.46	92.9534	539.349	102.179	539.46	92.9888	539.349	102.186	539.349	101.396	539.349	101.395	539.349	101.397	539.349	101.396	539.349	109.68	539.46	94.293	539.349	97.4244	539.46	94.2933	539.349	97.3464	539.46	93.5086	539.349	96.9492	539.46	94.2982
539.872	103.716	539.761	113.245	539.872	103.79	539.761	113.252	539.761	110.802	539.761	110.801	539.761	110.801	539.761	110.802	539.761	123.493	539.872	104.2	539.761	106.407	539.872	104.278	539.761	106.385	539.872	101.268	539.761	105.645	539.872	104.283
540.284	99.2587	540.173	107.631	540.284	99.3143	540.173	107.638	540.173	106.122	540.173	106.121	540.173	106.122	540.173	106.123	540.173	116.58	540.284	100.164	540.173	101.956	540.284	100.204	540.173	101.9	540.284	98.3767	540.173	101.366	540.284	100.208
540.696	102.432	540.585	112.384	540.696	102.51	540.585	112.391	540.585	109.802	540.585	109.801	540.585	109.801	540.585	109.802	540.585	122.789	540.696	102.845	540.585	105.375	540.696	102.93	540.585	105.358	540.696	99.6965	540.585	104.584	540.696	102.934
541.109	102.541	540.997	110.926	541.109	102.603	540.997	110.933	540.997	109.059	540.997	109.058	540.997	109.058	540.997	109.059	540.997	120.44	541.109	103.295	540.997	104.802	541.109	103.348	540.997	104.758	541.109	101.114	540.997	104.15	541.109	103.353
541.521	99.9197	541.409	110.706	541.521	100.002	541.409	110.712	541.409	107.965	541.409	107.964	541.409	107.963	541.409	107.964	541.409	121.279	541.521	100.224	541.409	103.505	541.521	100.319	541.409	103.495	541.521	96.7491	541.409	102.681	541.521	100.324
541.933	104.467	541.821	112.978	541.933	104.533	541.821	112.984	541.821	110.899	541.821	110.898	541.821	110.898	541.821	110.899	541.821	122.788	541.933	105.137	541.821	106.589	541.933	105.198	541.821	106.552	541.933	102.728	541.821	105.898	541.933	105.203
542.345	95.1431	542.233	107.95	542.345	95.2339	542.233	107.956	542.233	105.043	542.233	105.041	542.233	105.041	542.233	105.041	542.233	118.689	542.345	95.2314	542.233	100.564	542.345	95.3444	542.233	100.561	542.345	91.1617	542.233	99.7076	542.345	95.349
542.757	105.512	542.645	114.197	542.757	105.581	542.645	114.204	542.645	111.968	542.645	111.967	542.645	111.967	542.645	111.968	542.645	124.205	542.757	106.124	542.645	107.619	542.757	106.191	542.645	107.588	542.757	103.55	542.645	106.9	542.757	106.195
543.169	87.4085	543.057	104.194	543.169	87.4622	543.057	104.2	543.057	101.487	543.057	101.485	543.057	101.485	543.057	101.485	543.057	114.737	543.169	88.1932	543.057	97.1379	543.169	88.2197	543.057	97.1248	543.169	87.2527	543.057	96.3457	543.169	88.2242
543.581	105.85	543.469	114.761	543.581	105.922	543.469	114.768	543.469	112.409	543.469	112.408	543.469	112.408	543.469	112.409	543.469	124.924	543.581	106.414	543.469	108.029	543.581	106.485	543.469	108.003	543.581	103.702	543.469	107.286	543.581	106.49
543.993	95.2475	543.881	103.732	543.993	95.2932	543.881	103.739	543.881	102.125	543.881	102.124	543.881	102.125	543.881	102.125	543.881	112.747	543.993	96.3281	543.881	98.0123	543.993	96.3493	543.881	97.9604	543.993	95.0007	543.881	97.4145	543.993	96.3541
544.406	105.521	544.293	114.736	544.406	105.595	544.293	114.743	544.293	112.27	544.293	112.269	544.293	112.269	544.293	112.27	544.293	125.034	544.406	106.039	544.293	107.862	544.406	106.115	544.293	107.84	544.406	103.194	544.293	107.096	544.406	106.119
544.818	100.689	544.705	107.747	544.818	100.749	544.705	107.754	544.705	106.054	544.705	106.053	544.705	106.053	544.705	106.054	544.705	116.925	544.818	101.513	544.705	101.859	544.818	101.559	544.705	101.81	544.818	99.5179	544.705	101.237	544.818	101.564
545.23	104.463	545.117	114.113	545.23	104.539	545.117	114.12	545.117	111.532	545.117	111.53	545.117	111.53	545.117	111.531	545.117	124.546	545.23	104.931	545.117	107.093	545.23	105.011	545.117	107.077	545.23	101.939	545.117	106.303	545.23	105.016
545.642	103.802	545.529	111.071	545.642	103.867	545.529	111.078	545.529	109.109	545.529	109.107	545.529	109.108	545.529	109.109	545.529	120.696	545.642	104.513	545.529	104.833	545.642	104.571	545.529	104.793	545.642	102.214	545.529	104.164	545.642	104.576
546.054	102.485	545.941	112.817	546.054	102.563	545.941	112.823	545.941	110.102	545.941	110.1	545.941	110.1	545.941	110.101	545.941	123.392	546.054	102.89	545.941	105.632	546.054	102.975	545.941	105.621	546.054	99.7128	545.941	104.814	546.054	102.98
546.466	105.703	546.354	113.283	546.466	105.771	546.354	113.29	546.354	111.134	546.354	111.133	546.354	111.133	546.354	111.134	546.354	123.182	546.466	106.348	546.354	106.806	546.466	106.412	546.354	106.773	546.466	103.865	546.354	106.103	546.466	106.417
546.878	99.203	546.766	110.692	546.878	99.2843	546.766	110.698	546.766	107.819	546.766	107.817	546.766	107.817	546.766	107.818	546.766	121.425	546.878	99.5243	546.766	103.317	546.878	99.6164	546.766	103.313	546.878	96.1307	546.766	102.464	546.878	99.621
547.29	106.789	547.178	114.665	547.29	106.859	547.178	114.672	547.178	112.379	547.178	112.377	547.178	112.377	547.178	112.379	547.178	124.751	547.29	107.387	547.178	108.014	547.29	107.455	547.178	107.985	547.29	104.768	547.178	107.283	547.29	107.46
547.702	94.8382	547.59	107.625	547.702	94.9138	547.59	107.631	547.59	104.635	547.59	104.633	547.59	104.633	547.59	104.634	547.59	118.455	547.702	95.241	547.59	100.135	547.702	95.3211	547.59	100.135	547.702	92.3347	547.59	99.2608	547.702	95.3257
548.115	107.226	548.002	115.396	548.115	107.298	548.002	115.403	548.002	112.996	548.002	112.994	548.002	112.994	548.002	112.995	548.002	125.628	548.115	107.785	548.002	108.6	548.115	107.856	548.002	108.576	548.115	105.051	548.002	107.847	548.115	107.861
548.527	96.1881	548.414	104.996	548.527	96.2447	548.414	105.003	548.414	102.494	548.414	102.492	548.414	102.493	548.414	102.493	548.414	115.271	548.527	97.0295	548.414	98.177	548.527	97.0712	548.414	98.1559	548.527	95.1837	548.414	97.4187	548.527	97.0759
548.939	107.062	548.826	115.552	548.939	107.136	548.826	115.559	548.826	113.046	548.826	113.045	548.826	113.045	548.826	113.046	548.826	125.913	548.939	107.584	548.826	108.622	548.939	107.659	548.826	108.602	548.939	104.741	548.826	107.848	548.939	107.664
549.351	100.837	549.238	106.8	549.351	100.899	549.238	106.807	549.238	104.872	549.238	104.87	549.238	104.871	549.238	104.871	549.238	116.289	549.351	101.603	549.238	100.647	549.351	101.654	549.238	100.606	549.351	99.4687	549.238	99.9855	549.351	101.659
549.763	106.274	549.65	115.148	549.763	106.349	549.65	115.154	549.65	112.534	549.65	112.532	549.65	112.532	549.65	112.533	549.65	125.636	549.763	106.756	549.65	108.081	549.763	106.835	549.65	108.065	549.763	103.796	549.65	107.285	549.763	106.84
550.175	104.048	550.062	110.175	550.175	104.114	550.062	110.181	550.062	108.14	550.062	108.139	550.062	108.139	550.062	108.14	550.062	119.866	550.175	104.729	550.062	103.857	550.175	104.789	550.062	103.819	550.175	102.348	550.062	103.174	550.175	104.794
550.587	104.755	550.474	114.135	550.587	104.833	550.474	114.142	550.474	111.397	550.474	111.396	550.474	111.396	550.474	111.397	550.474	124.762	550.587	105.19	550.474	106.912	550.587	105.274	550.474	106.901	550.587	102.088	550.474	106.09	550.587	105.278
550.999	106.106	550.886	112.702	550.999	106.175	550.886	112.709	550.886	110.502	550.886	110.501	550.886	110.501	550.886	110.502	550.886	122.651	550.999	106.731	550.886	106.166	550.999	106.796	550.886	106.135	550.999	104.186	550.886	105.452	550.999	106.801
551.412	102.306	551.298	112.396	551.412	102.386	551.298	112.403	551.298	109.501	551.298	109.499	551.298	109.498	551.298	109.5	551.298	123.189	551.412	102.679	551.298	104.975	551.412	102.768	551.298	104.971	551.412	99.398	551.298	104.118	551.412	102.773
551.824	107.351	551.71	114.355	551.824	107.422	551.71	114.362	551.71	112.021	551.71	112.02	551.71	112.02	551.71	112.021	551.71	124.493	551.824	107.934	551.71	107.646	551.824	108.003	551.71	107.619	551.824	105.267	551.71	106.906	551.824	108.008
552.236	98.8414	552.122	109.733	552.236	98.9225	552.122	109.74	552.122	106.625	552.122	106.623	552.122	106.623	552.122	106.624	552.122	120.726	552.236	99.1667	552.122	102.054	552.236	99.2583	552.122	102.059	552.236	95.7966	552.122	101.148	552.236	99.2629
552.648	107.952	552.534	115.309	552.648	108.024	552.534	115.316	552.534	112.863	552.534	112.862	552.534	112.862	552.534	112.863	552.534	125.597	552.648	108.499	552.534	108.456	552.648	108.572	552.534	108.433	552.648	105.729	552.534	107.694	552.648	108.577
553.06	96.862	552.946	106.239	553.06	96.9319	552.946	106.246	552.946	103.024	552.946	103.021	552.946	103.021	552.946	103.021	552.946	117.308	553.06	97.4071	552.946	98.4744	553.06	97.4755	552.946	98.4847	553.06	94.8013	552.946	97.5521	553.06	97.4801
553.472	107.977	553.358	115.669	553.472	108.051	553.358	115.675	553.358	113.119	553.358	113.117	553.358	113.117	553.358	113.118	553.358	126.088	553.472	108.492	553.358	108.681	553.472	108.568	553.358	108.663	553.472	105.623	553.358	107.898	553.472	108.573
553.884	99.9112	553.77	104.99	553.884	99.9752	553.77	104.996	553.77	102.562	553.77	102.56	553.77	102.56	553.77	102.56	553.77	115.172	553.884	100.609	553.77	98.2605	553.884	100.665	553.77	98.2377	553.884	98.3179	553.77	97.5161	553.884	100.669
554.296	107.429	554.182	115.47	554.296	107.504	554.182	115.476	554.182	112.813	554.182	112.812	554.182	112.811	554.182	112.813	554.182	126.018	554.296	107.909	554.182	108.345	554.296	107.988	554.182	108.331	554.296	104.935	554.182	107.541	554.296	107.993
554.708	103.323	554.594	108.102	554.708	103.39	554.594	108.109	554.594	105.996	554.594	105.994	554.594	105.995	554.594	105.996	554.594	117.85	554.708	103.977	554.594	101.718	554.708	104.04	554.594	101.684	554.708	101.532	554.594	101.023	554.708	104.044
555.121	106.241	555.006	114.686	555.121	106.319	555.006	114.692	555.006	111.907	555.006	111.906	555.006	111.905	555.006	111.907	555.006	125.376	555.121	106.68	555.006	107.405	555.121	106.763	555.006	107.396	555.121	103.581	555.006	106.575	555.121	106.768
555.533	105.679	555.418	111.172	555.533	105.749	555.418	111.179	555.418	108.945	555.418	108.944	555.418	108.944	555.418	108.945	555.418	121.126	555.533	106.286	555.418	104.612	555.533	106.353	555.418	104.582	555.533	103.692	555.418	103.893	555.533	106.358
555.945	104.267	555.83	113.22	555.945	104.347	555.83	113.226	555.83	110.283	555.83	110.282	555.83	110.281	555.83	110.283	555.83	124.083	555.945	104.651	555.83	105.737	555.945	104.74	555.83	105.734	555.945	101.384	555.83	104.872	555.945	104.744
556.357	107.172	556.242	113.248	556.357	107.244	556.242	113.255	556.242	110.883	556.242	110.882	556.242	110.882	556.242	110.883	556.242	123.407	556.357	107.74	556.242	106.505	556.357	107.811	556.242	106.479	556.357	105.03	556.242	105.759	556.357	107.816
556.769	101.291	556.654	110.858	556.769	101.375	556.654	110.864	556.654	107.683	556.654	107.682	556.654	107.681	556.654	107.682	556.654	121.963	556.769	101.599	556.654	103.071	556.769	101.695	556.654	103.079	556.769	98.101	556.654	102.151	556.769	101.699
557.181	107.986	557.066	114.505	557.181	108.059	557.066	114.512	557.066	112.021	557.066	112.019	557.066	112.019	557.066	112.02	557.066	124.829	557.181	108.521	557.066	107.605	557.181	108.595	557.066	107.585	557.181	105.711	557.066	106.835	557.181	108.6
557.593	97.7746	557.478	107.213	557.593	97.8571	557.478	107.219	557.478	103.63	557.478	103.628	557.478	103.626	557.478	103.628	557.478	118.682	557.593	98.064	557.478	98.9167	557.593	98.1584	557.478	98.9439	557.593	94.6045	557.478	97.8961	557.593	98.163
558.005	108.214	557.89	115.098	558.005	108.289	557.89	115.105	557.89	112.504	557.89	112.502	557.89	112.502	557.89	112.503	557.89	125.566	558.005	108.718	557.89	108.055	558.005	108.795	557.89	108.038	558.005	105.812	557.89	107.263	558.005	108.8
558.417	97.9969	558.302	102.791	558.417	98.0658	558.302	102.797	558.302	99.1822	558.302	99.1778	558.302	99.1779	558.302	99.1778	558.302	114.295	558.417	98.5593	558.302	94.6055	558.417	98.6271	558.302	94.631	558.417	95.9585	558.302	93.6211	558.417	98.6317
558.83	107.88	558.714	115.099	558.83	107.957	558.714	115.106	558.714	112.392	558.714	112.391	558.714	112.391	558.714	112.392	558.714	125.706	558.83	108.351	558.714	107.911	558.83	108.432	558.714	107.898	558.83	105.347	558.714	107.095	558.83	108.437
559.242	101.528	559.126	104.346	559.242	101.597	559.126	104.353	559.126	102.168	559.126	102.166	559.126	102.168	559.126	102.167	559.126	114.211	559.242	102.154	559.126	97.9347	559.242	102.218	559.126	97.9018	559.242	99.6491	559.126	97.2397	559.242	102.223
559.654	106.945	559.539	114.506	559.654	107.023	559.539	114.512	559.539	111.673	559.539	111.671	559.539	111.671	559.539	111.672	559.539	125.265	559.654	107.378	559.539	107.153	559.654	107.462	559.539	107.146	559.654	104.256	559.539	106.311	559.654	107.467
560.066	104.379	559.951	108.541	560.066	104.449	559.951	108.547	559.951	106.362	559.951	106.36	559.951	106.361	559.951	106.362	559.951	118.392	560.066	104.97	559.951	102.062	560.066	105.038	559.951	102.031	560.066	102.341	559.951	101.353	560.066	105.043
560.478	105.29	560.363	113.241	560.478	105.37	560.363	113.248	560.363	110.246	560.363	110.244	560.363	110.244	560.363	110.245	560.363	124.186	560.478	105.672	560.363	105.677	560.478	105.761	560.363	105.676	560.478	102.389	560.363	104.8	560.478	105.766
560.89	106.24	560.775	111.339	560.89	106.313	560.775	111.346	560.775	108.988	560.775	108.987	560.775	108.987	560.775	108.988	560.775	121.45	560.89	106.795	560.775	104.625	560.89	106.867	560.775	104.599	560.89	104.048	560.775	103.881	560.89	106.872
561.302	102.668	561.187	111.1	561.302	102.752	561.187	111.107	561.187	107.859	561.187	107.858	561.187	107.856	561.187	107.858	561.187	122.311	561.302	102.971	561.187	103.214	561.302	103.067	561.187	103.224	561.302	99.4318	561.187	102.28	561.302	103.072
561.714	107.328	561.599	113.018	561.714	107.402	561.599	113.025	561.599	110.521	561.599	110.519	561.599	110.519	561.599	110.52	561.599	123.338	561.714	107.849	561.599	106.109	561.714	107.925	561.599	106.089	561.714	105	561.599	105.336	561.714	107.929
562.127	98.7281	562.011	107.569	562.127	98.8171	562.011	107.575	562.011	103.839	562.011	103.837	562.011	103.835	562.011	103.837	562.011	119.252	562.127	98.8944	562.011	99.0384	562.127	99.0033	562.011	99.0706	562.127	94.919	562.011	97.9832	562.127	99.0079
562.539	107.778	562.423	113.883	562.539	107.853	562.423	113.889	562.423	111.254	562.423	111.253	562.423	111.253	562.423	111.254	562.423	124.375	562.539	108.267	562.423	106.802	562.539	108.346	562.423	106.786	562.539	105.321	562.423	106.002	562.539	108.351
562.951	95.2647	562.835	101.166	562.951	95.3484	562.835	101.171	562.835	95.8554	562.835	95.8518	562.835	95.8486	562.835	95.8503	562.835	114.001	562.951	95.5107	562.835	90.5444	562.951	95.6075	562.835	90.6679	562.951	92.0431	562.835	88.9879	562.951	95.612
563.363	107.643	563.247	114.074	563.363	107.72	563.247	114.08	563.247	111.316	563.247	111.314	563.247	111.314	563.247	111.315	563.247	124.73	563.363	108.1	563.247	106.823	563.363	108.182	563.247	106.812	563.363	105.053	563.247	105.996	563.363	108.187
563.775	98.3202	563.659	97.0327	563.775	98.3885	563.659	97.0387	563.659	95.3328	563.659	95.3286	563.659	95.3329	563.659	95.3304	563.659	107.426	563.775	98.9071	563.659	91.4814	563.775	98.9728	563.659	91.415	563.775	96.3614	563.659	90.9915	563.775	98.9775
564.187	106.91	564.071	113.626	564.187	106.989	564.071	113.632	564.071	110.724	564.071	110.723	564.071	110.722	564.071	110.723	564.071	124.457	564.187	107.33	564.071	106.186	564.187	107.416	564.071	106.182	564.187	104.165	564.071	105.329	564.187	107.421
564.599	102.101	564.483	104.867	564.599	102.171	564.483	104.875	564.483	103.085	564.483	103.083	564.483	103.085	564.483	103.085	564.483	114.141	564.599	102.688	564.483	98.9153	564.599	102.756	564.483	98.8689	564.599	100.066	564.483	98.2836	564.599	102.761
565.011	105.482	564.895	112.481	565.011	105.563	564.895	112.488	564.895	109.399	564.895	109.397	564.895	109.396	564.895	109.398	564.895	123.526	565.011	105.853	564.895	104.802	565.011	105.944	564.895	104.805	565.011	102.531	564.895	103.906	565.011	105.948
565.423	104.549	565.307	108.923	565.423	104.621	565.307	108.93	565.307	106.743	565.307	106.741	565.307	106.741	565.307	106.742	565.307	118.782	565.423	105.096	565.307	102.437	565.423	105.168	565.307	102.406	565.423	102.338	565.307	101.727	565.423	105.173
565.836	103.117	565.719	110.448	565.836	103.201	565.719	110.455	565.719	107.099	565.719	107.097	565.719	107.095	565.719	107.098	565.719	121.794	565.836	103.411	565.719	102.412	565.836	103.509	565.719	102.426	565.836	99.8372	565.719	101.455	565.836	103.514
566.248	105.998	566.131	111.129	566.248	106.072	566.131	111.135	566.131	108.707	566.131	108.705	566.131	108.705	566.131	108.706	566.131	121.328	566.248	106.508	566.131	104.326	566.248	106.585	566.131	104.303	566.248	103.631	566.131	103.568	566.248	106.589
566.66	99.2288	566.543	107.011	566.66	99.3211	566.543	107.017	566.543	103.165	566.543	103.163	566.543	103.161	566.543	103.163	566.543	118.888	566.66	99.3633	566.543	98.3001	566.66	99.4774	566.543	98.3349	566.66	95.2356	566.543	97.2276	566.66	99.482
567.072	106.694	566.955	112.256	567.072	106.77	566.955	112.263	566.955	109.649	566.955	109.647	566.955	109.647	566.955	109.648	566.955	122.7	567.072	107.169	566.955	105.211	567.072	107.249	566.955	105.195	567.072	104.182	566.955	104.415	567.072	107.254
567.484	92.52	567.367	100.322	567.484	92.6294	567.367	100.327	567.367	95.0705	567.367	95.0707	567.367	95.0652	567.367	95.0703	567.367	113.638	567.484	92.1992	567.367	89.6459	567.484	92.356	567.367	89.7273	567.484	86.3575	567.367	88.3253	567.484	92.3605
567.896	106.745	567.779	112.581	567.896	106.823	567.779	112.587	567.779	109.802	567.779	109.8	567.779	109.8	567.779	109.801	567.779	123.239	567.896	107.185	567.779	105.311	567.896	107.268	567.779	105.302	567.896	104.086	567.779	104.479	567.896	107.273
568.308	92.6523	568.191	88.9027	568.308	92.7185	568.191	88.9177	568.191	93.2265	568.191	93.2286	568.191	93.2349	568.191	93.235	568.191	96.7194	568.308	93.2435	568.191	89.9582	568.308	93.3026	568.191	89.7683	568.308	91.0347	568.191	90.004	568.308	93.3072
568.72	106.163	568.603	112.179	568.72	106.243	568.603	112.186	568.603	109.213	568.603	109.211	568.603	109.21	568.603	109.212	568.603	123.062	568.72	106.563	568.603	104.663	568.72	106.651	568.603	104.662	568.72	103.336	568.603	103.79	568.72	106.656
569.133	98.8613	569.015	102.823	569.133	98.9276	569.015	102.83	569.015	101.907	569.015	101.906	569.015	101.908	569.015	101.908	569.015	110.608	569.133	99.5027	569.015	97.8974	569.133	99.5637	569.015	97.8234	569.133	97.0859	569.015	97.4015	569.133	99.5684
569.545	104.874	569.427	111.006	569.545	104.956	569.427	111.012	569.427	107.802	569.427	107.8	569.427	107.799	569.427	107.801	569.427	122.161	569.545	105.223	569.427	103.174	569.545	105.316	569.427	103.183	569.545	101.829	569.427	102.249	569.545	105.32
569.957	102.277	569.839	107.498	569.957	102.347	569.839	107.505	569.839	105.704	569.839	105.703	569.839	105.704	569.839	105.705	569.839	116.814	569.957	102.846	569.839	101.49	569.957	102.916	569.839	101.445	569.957	100.173	569.839	100.851	569.957	102.92
570.369	102.651	570.251	108.851	570.369	102.736	570.251	108.858	570.251	105.299	570.251	105.296	570.251	105.294	570.251	105.297	570.251	120.397	570.369	102.923	570.251	100.547	570.369	103.024	570.251	100.571	570.369	99.2733	570.251	99.5405	570.369	103.028
570.781	104.179	570.663	109.873	570.781	104.253	570.663	109.88	570.663	107.684	570.663	107.683	570.663	107.683	570.663	107.684	570.663	119.76	570.781	104.695	570.663	103.367	570.781	104.77	570.663	103.336	570.781	101.843	570.663	102.655	570.781	104.775
571.193	98.8744	571.075	105.167	571.193	98.9673	571.075	105.172	571.075	101.033	571.075	101.032	571.075	101.028	571.075	101.031	571.075	117.386	571.193	98.9961	571.075	96.0502	571.193	99.1121	571.075	96.0963	571.193	94.8323	571.075	94.9211	571.193	99.1168
571.605	105.12	571.487	111.034	571.605	105.196	571.487	111.041	571.487	108.581	571.487	108.579	571.487	108.579	571.487	108.58	571.487	121.272	571.605	105.589	571.487	104.192	571.605	105.669	571.487	104.17	571.605	102.59	571.487	103.427	571.605	105.674
572.017	91.0495	571.899	98.8654	572.017	91.1704	571.899	98.8722	571.899	95.2057	571.899	95.2084	571.899	95.2065	571.899	95.2104	571.899	112.164	572.017	90.6119	571.899	90.4747	572.017	90.788	571.899	90.4244	572.017	84.5447	571.899	89.8507	572.017	90.7926
572.429	105.305	572.312	111.307	572.429	105.383	572.312	111.314	572.312	108.623	572.312	108.621	572.312	108.621	572.312	108.622	572.312	121.83	572.429	105.729	572.312	104.169	572.429	105.814	572.312	104.156	572.429	102.585	572.312	103.357	572.429	105.819
572.842	84.4398	572.724	99.0512	572.842	84.423	572.724	99.0591	572.724	99.1752	572.724	99.1766	572.724	99.1783	572.724	99.1795	572.724	106.938	572.842	86.6429	572.724	95.291	572.842	86.5595	572.724	95.1767	572.842	87.7776	572.724	94.9793	572.842	86.5644
573.254	104.786	573.136	110.765	573.254	104.867	573.136	110.772	573.136	107.831	573.136	107.829	573.136	107.829	573.136	107.83	573.136	121.58	573.254	105.16	573.136	103.305	573.254	105.25	573.136	103.303	573.254	101.854	573.136	102.439	573.254	105.255
573.666	96.2652	573.548	105.065	573.666	96.3197	573.548	105.073	573.548	104.026	573.548	104.025	573.548	104.027	573.548	104.028	573.548	113.324	573.666	97.1437	573.548	99.9459	573.666	97.1828	573.548	99.8738	573.666	95.3672	573.548	99.4336	573.666	97.1875
574.078	103.495	573.96	109.309	574.078	103.579	573.96	109.316	573.96	106.038	573.96	106.035	573.96	106.035	573.96	106.036	573.96	120.49	574.078	103.806	573.96	101.409	574.078	103.903	573.96	101.421	574.078	100.29	573.96	100.465	574.078	103.907
574.49	100.485	574.372	108.476	574.49	100.55	574.372	108.483	574.372	106.821	574.372	106.82	574.372	106.82	574.372	106.821	574.372	117.654	574.49	101.152	574.372	102.616	574.49	101.212	574.372	102.565	574.49	98.7683	574.372	102	574.49	101.216
574.902	101.194	574.784	106.572	574.902	101.283	574.784	106.578	574.784	102.716	574.784	102.714	574.784	102.712	574.784	102.713	574.784	118.336	574.902	101.413	574.784	97.8894	574.902	101.52	574.784	97.929	574.902	97.5867	574.784	96.7986	574.902	101.524
575.314	102.647	575.196	110.373	575.314	102.718	575.196	110.38	575.196	108.365	575.196	108.364	575.196	108.364	575.196	108.365	575.196	120.045	575.314	103.214	575.196	104.081	575.314	103.284	575.196	104.042	575.314	100.526	575.196	103.402	575.314	103.289
575.726	97.2448	575.608	101.482	575.726	97.3428	575.608	101.487	575.608	96.2809	575.608	96.28	575.608	96.2752	575.608	96.279	575.608	114.492	575.726	97.3131	575.608	90.8858	575.726	97.4361	575.608	90.9876	575.726	93.0016	575.608	89.4387	575.726	97.4408
576.138	103.672	576.02	111.273	576.138	103.747	576.02	111.279	576.02	109.012	576.02	109.011	576.02	109.011	576.02	109.012	576.02	121.277	576.138	104.168	576.02	104.667	576.138	104.245	576.02	104.638	576.138	101.261	576.02	103.941	576.138	104.25
576.551	90.0493	576.432	94.8926	576.551	90.1551	576.432	94.9015	576.432	94.2718	576.432	94.2758	576.432	94.2772	576.432	94.2808	576.432	107.959	576.551	90.2307	576.432	90.3713	576.551	90.3448	576.432	90.2172	576.551	87.3755	576.432	90.2429	576.551	90.3498
576.963	103.84	576.844	111.357	576.963	103.917	576.844	111.364	576.844	108.875	576.844	108.874	576.844	108.874	576.844	108.875	576.844	121.636	576.963	104.271	576.844	104.476	576.963	104.355	576.844	104.455	576.963	101.163	576.844	103.706	576.963	104.359
577.375	91.0616	577.256	102.486	577.375	91.0883	577.256	102.494	577.256	101.953	577.256	101.953	577.256	101.954	577.256	101.955	577.256	110.4	577.375	92.6118	577.256	97.9494	577.375	92.5971	577.256	97.8593	577.375	92.2417	577.256	97.5261	577.375	92.6021
577.787	103.203	577.668	110.63	577.787	103.284	577.668	110.637	577.668	107.912	577.668	107.91	577.668	107.91	577.668	107.911	577.668	121.185	577.787	103.565	577.668	103.453	577.787	103.655	577.668	103.443	577.787	100.227	577.668	102.634	577.787	103.66
578.199	97.4639	578.08	107.391	578.199	97.5157	578.08	107.398	578.08	106.04	578.08	106.04	578.08	106.041	578.08	106.042	578.08	116.223	578.199	98.4395	578.08	101.885	578.199	98.472	578.08	101.823	578.199	96.827	578.08	101.325	578.199	98.4768
578.611	101.652	578.492	108.917	578.611	101.737	578.492	108.924	578.492	105.88	578.492	105.878	578.492	105.877	578.492	105.878	578.492	119.819	578.611	101.919	578.492	101.34	578.611	102.019	578.492	101.343	578.611	98.2636	578.492	100.452	578.611	102.024
579.023	100.832	578.904	110.162	579.023	100.894	578.904	110.169	578.904	108.406	578.904	108.405	578.904	108.405	578.904	108.406	578.904	119.544	579.023	101.589	578.904	104.166	579.023	101.641	578.904	104.118	579.023	99.4241	578.904	103.534	579.023	101.646
579.435	98.8063	579.316	105.658	579.435	98.8984	579.316	105.664	579.316	102.025	579.316	102.022	579.316	102.021	579.316	102.022	579.316	117.144	579.435	98.9184	579.316	97.334	579.435	99.034	579.316	97.3645	579.435	94.7133	579.316	96.306	579.435	99.0387
579.848	102.654	579.728	111.755	579.848	102.722	579.728	111.762	579.728	109.743	579.728	109.742	579.728	109.742	579.728	109.743	579.728	121.474	579.848	103.295	579.728	105.446	579.848	103.358	579.728	105.407	579.848	100.813	579.728	104.768	579.848	103.363
580.26	93.5853	580.14	98.5818	580.26	93.6946	580.14	98.5867	580.14	92.7883	580.14	92.782	580.14	92.7787	580.14	92.779	580.14	111.768	580.26	93.4091	580.14	87.6072	580.26	93.5579	580.14	87.7455	580.26	88.2749	580.14	86.0459	580.26	93.5625
580.672	103.468	580.552	112.516	580.672	103.54	580.552	112.523	580.552	110.311	580.552	110.31	580.552	110.31	580.552	110.311	580.552	122.479	580.672	104.028	580.552	105.97	580.672	104.099	580.552	105.938	580.672	101.312	580.552	105.255	580.672	104.104
581.084	87.7665	580.964	91.2251	581.084	87.827	580.964	91.2344	580.964	94.348	580.964	94.3488	580.964	94.3541	580.964	94.3525	580.964	85.5966	581.084	89.0272	580.964	90.9672	581.084	89.0401	580.964	90.802	581.084	88.7106	580.964	90.9094	581.084	89.0454
581.496	103.453	581.376	112.569	581.496	103.528	581.376	112.576	581.376	110.196	581.376	110.195	581.376	110.195	581.376	110.196	581.376	122.737	581.496	103.941	581.376	105.816	581.496	104.019	581.376	105.791	581.496	101.01	581.376	105.067	581.496	104.023
581.908	95.1025	581.788	103.847	581.908	95.1462	581.788	103.855	581.788	103.036	581.788	103.035	581.788	103.037	581.788	103.037	581.788	111.731	581.908	96.3009	581.788	98.9985	581.908	96.3158	581.788	98.9195	581.908	95.1818	581.788	98.5212	581.908	96.3207
582.32	102.599	582.2	111.917	582.32	102.677	582.2	111.923	582.2	109.374	582.2	109.372	582.2	109.372	582.2	109.373	582.2	122.282	582.32	103.007	582.2	104.953	582.32	103.092	582.2	104.935	582.32	99.8325	582.2	104.17	582.32	103.097
582.732	99.7623	582.612	108.59	582.732	99.8192	582.612	108.597	582.612	107.052	582.612	107.051	582.612	107.052	582.612	107.053	582.612	117.671	582.732	100.657	582.612	102.859	582.732	100.698	582.612	102.803	582.732	98.8276	582.612	102.266	582.732	100.703
583.144	100.698	583.024	110.438	583.144	100.781	583.024	110.445	583.024	107.695	583.024	107.694	583.024	107.694	583.024	107.694	583.024	121.021	583.144	100.993	583.024	103.231	583.144	101.09	583.024	103.221	583.144	97.4601	583.024	102.406	583.144	101.094
583.557	102.397	583.436	111.263	583.557	102.46	583.436	111.27	583.436	109.393	583.436	109.392	583.436	109.392	583.436	109.394	583.436	120.813	583.557	103.148	583.436	105.124	583.557	103.202	583.436	105.08	583.557	100.952	583.436	104.473	583.557	103.207
583.969	97.0751	583.848	107.822	583.969	97.1675	583.848	107.828	583.848	104.809	583.848	104.807	583.848	104.807	583.848	104.808	583.848	118.682	583.969	97.1463	583.848	100.293	583.969	97.2642	583.848	100.295	583.969	92.8412	583.848	99.4124	583.969	97.2688
584.381	103.876	584.26	112.838	584.381	103.942	584.26	112.845	584.26	110.761	584.26	110.76	584.26	110.76	584.26	110.761	584.26	122.664	584.381	104.539	584.26	106.443	584.381	104.601	584.26	106.407	584.381	102.107	584.26	105.753	584.381	104.606
584.793	88.6077	584.672	103.414	584.793	88.74	584.672	103.42	584.672	100.153	584.672	100.15	584.672	100.151	584.672	100.15	584.672	114.562	584.793	87.6691	584.672	95.6652	584.793	87.8896	584.672	95.6746	584.793	78.3645	584.672	94.7564	584.793	87.8939
585.205	104.523	585.084	113.649	585.205	104.593	585.084	113.656	585.084	111.414	585.084	111.413	585.084	111.413	585.084	111.415	585.084	123.672	585.205	105.121	585.084	107.059	585.205	105.189	585.084	107.029	585.205	102.505	585.084	106.339	585.205	105.194
585.617	86.6625	585.497	99.4014	585.617	86.6562	585.497	99.4076	585.497	98.0431	585.497	98.0408	585.497	98.0437	585.497	98.0421	585.497	108.463	585.617	88.8172	585.497	94.0907	585.617	88.751	585.497	94.0255	585.617	89.5246	585.497	93.5712	585.617	88.7561
586.029	104.449	585.909	113.821	586.029	104.522	585.909	113.828	585.909	111.451	585.909	111.45	585.909	111.45	585.909	111.451	585.909	124.009	586.029	104.989	585.909	107.064	586.029	105.062	585.909	107.038	586.029	102.207	585.909	106.317	586.029	105.067
586.441	96.9056	586.321	104.425	586.441	96.9543	586.321	104.433	586.321	103.24	586.321	103.239	586.321	103.241	586.321	103.242	586.321	112.747	586.441	97.9582	586.321	99.1595	586.441	97.9852	586.321	99.0941	586.441	96.5121	586.321	98.6212	586.441	97.9901
586.854	103.632	586.733	113.382	586.854	103.707	586.733	113.389	586.733	110.88	586.733	110.879	586.733	110.879	586.733	110.88	586.733	123.723	586.854	104.111	586.733	106.462	586.854	104.19	586.733	106.441	586.854	101.153	586.733	105.688	586.854	104.195
587.266	101.193	587.145	108.83	587.266	101.253	587.145	108.837	587.145	107.147	587.145	107.146	587.145	107.147	587.145	107.148	587.145	118.063	587.266	102.019	587.145	102.931	587.266	102.066	587.145	102.881	587.266	100.012	587.145	102.312	587.266	102.071
587.678	101.917	587.557	112.285	587.678	101.995	587.557	112.291	587.557	109.64	587.557	109.638	587.557	109.638	587.557	109.639	587.557	122.782	587.678	102.32	587.557	105.188	587.678	102.406	587.557	105.174	587.678	99.1383	587.557	104.384	587.678	102.41
588.09	103.638	587.969	111.565	588.09	103.702	587.969	111.572	587.969	109.601	587.969	109.6	587.969	109.601	587.969	109.602	587.969	121.228	588.09	104.357	587.969	105.313	588.09	104.414	587.969	105.273	588.09	102.069	587.969	104.644	588.09	104.419
588.502	98.8937	588.381	110.399	588.502	98.9759	588.381	110.405	588.381	107.588	588.381	107.586	588.381	107.585	588.381	107.587	588.381	121.064	588.502	99.1828	588.381	103.102	588.502	99.2785	588.381	103.095	588.502	95.6741	588.381	102.263	588.502	99.2831
588.914	105.054	588.793	113.257	588.914	105.122	588.793	113.264	588.793	111.109	588.793	111.108	588.793	111.109	588.793	111.11	588.793	123.173	588.914	105.706	588.793	106.775	588.914	105.769	588.793	106.741	588.914	103.232	588.793	106.072	588.914	105.773
589.326	93.7886	589.205	107.563	589.326	93.8741	589.205	107.57	589.205	104.598	589.205	104.596	589.205	104.596	589.205	104.597	589.205	118.367	589.326	93.957	589.205	100.101	589.326	94.0601	589.205	100.101	589.326	90.341	589.205	99.2315	589.326	94.0646
589.738	105.726	589.617	114.204	589.738	105.796	589.617	114.211	589.617	111.917	589.617	111.916	589.617	111.916	589.617	111.918	589.617	124.302	589.738	106.325	589.617	107.547	589.738	106.393	589.617	107.518	589.738	103.707	589.617	106.817	589.738	106.398
590.15	91.8419	590.029	104.424	590.15	91.8898	590.029	104.43	590.029	101.772	590.029	101.77	590.029	101.77	590.029	101.77	590.029	114.887	590.15	92.8208	590.029	97.4227	590.15	92.8449	590.029	97.408	590.15	91.4991	590.029	96.6362	590.15	92.8496
590.563	105.759	590.441	114.544	590.563	105.831	590.441	114.551	590.441	112.137	590.441	112.136	590.441	112.136	590.441	112.137	590.441	124.791	590.563	106.314	590.441	107.736	590.563	106.386	590.441	107.712	590.563	103.566	590.441	106.982	590.563	106.391
590.975	97.7347	590.853	104.942	590.975	97.7895	590.853	104.948	590.853	103.119	590.853	103.117	590.853	103.118	590.853	103.118	590.853	114.279	590.975	98.6472	590.853	98.9338	590.975	98.685	590.853	98.8892	590.975	96.8926	590.853	98.2941	590.975	98.6897
591.387	105.167	591.265	114.326	591.387	105.242	591.265	114.332	591.265	111.803	591.265	111.801	591.265	111.801	591.265	111.802	591.265	124.709	591.387	105.677	591.265	107.372	591.387	105.753	591.265	107.353	591.387	102.799	591.265	106.595	591.387	105.758
591.799	101.711	591.677	108.317	591.799	101.773	591.677	108.324	591.677	106.458	591.677	106.457	591.677	106.458	591.677	106.459	591.677	117.749	591.799	102.48	591.677	102.218	591.799	102.532	591.677	102.175	591.799	100.33	591.677	101.566	591.799	102.536
592.211	103.884	592.089	113.535	592.211	103.96	592.089	113.542	592.089	110.89	592.089	110.888	592.089	110.888	592.089	110.889	592.089	124.057	592.211	104.343	592.089	106.429	592.211	104.424	592.089	106.414	592.211	101.32	592.089	105.626	592.211	104.428
592.623	104.161	592.501	111.092	592.623	104.228	592.501	111.098	592.501	109.035	592.501	109.034	592.501	109.035	592.501	109.036	592.501	120.849	592.623	104.847	592.501	104.732	592.623	104.907	592.501	104.695	592.623	102.468	592.501	104.045	592.623	104.912
593.035	101.768	592.913	112.112	593.035	101.846	592.913	112.119	592.913	109.325	592.913	109.323	592.913	109.323	592.913	109.324	592.913	122.782	593.035	102.167	592.913	104.831	593.035	102.253	592.913	104.822	593.035	98.9744	592.913	103.997	593.035	102.258
593.447	105.652	593.325	112.95	593.447	105.721	593.325	112.957	593.325	110.734	593.325	110.732	593.325	110.733	593.325	110.734	593.325	122.942	593.447	106.283	593.325	106.385	593.447	106.348	593.325	106.353	593.447	103.747	593.325	105.668	593.447	106.352
593.86	98.7528	593.737	109.97	593.86	98.8326	593.737	109.977	593.737	107.02	593.737	107.019	593.737	107.018	593.737	107.019	593.737	120.793	593.86	99.1052	593.737	102.495	593.86	99.1941	593.737	102.494	593.86	95.8201	593.737	101.626	593.86	99.1987
594.272	106.441	594.149	114.076	594.272	106.512	594.149	114.083	594.149	111.731	594.149	111.729	594.149	111.73	594.149	111.731	594.149	124.243	594.272	107.028	594.149	107.346	594.272	107.097	594.149	107.32	594.272	104.368	594.149	106.605	594.272	107.102
594.684	96.3525	594.561	107.252	594.684	96.4239	594.561	107.259	594.561	104.228	594.561	104.226	594.561	104.226	594.561	104.227	594.561	118.12	594.684	96.864	594.561	99.7171	594.684	96.9356	594.561	99.719	594.684	94.1684	594.561	98.8347	594.684	96.9402
595.096	106.639	594.973	114.598	595.096	106.711	594.973	114.605	594.973	112.14	594.973	112.138	594.973	112.138	594.973	112.139	594.973	124.911	595.096	107.187	594.973	107.724	595.096	107.26	594.973	107.702	595.096	104.418	594.973	106.96	595.096	107.265
595.508	98.2305	595.385	105.602	595.508	98.2931	595.385	105.609	595.385	103.022	595.385	103.02	595.385	103.02	595.385	103.02	595.385	115.959	595.508	98.9584	595.385	98.6639	595.508	99.0116	595.385	98.6471	595.508	96.7666	595.385	97.884	595.508	99.0163
595.92	106.278	595.797	114.577	595.92	106.352	595.797	114.583	595.797	112.008	595.797	112.006	595.797	112.006	595.797	112.007	595.797	125.023	595.92	106.789	595.797	107.563	595.92	106.866	595.797	107.545	595.92	103.911	595.797	106.777	595.92	106.871
596.332	101.501	596.209	107.218	596.332	101.565	596.209	107.225	596.209	105.071	596.209	105.07	596.209	105.07	596.209	105.071	596.209	117.019	596.332	102.205	596.209	100.787	596.332	102.262	596.209	100.754	596.332	99.8952	596.209	100.084	596.332	102.267
596.744	105.343	596.621	114.022	596.744	105.418	596.621	114.028	596.621	111.336	596.621	111.335	596.621	111.334	596.621	111.335	596.621	124.602	596.744	105.814	596.621	106.86	596.744	105.894	596.621	106.847	596.744	102.817	596.621	106.05	596.744	105.899
597.156	103.954	597.033	109.848	597.156	104.022	597.033	109.855	597.033	107.677	597.033	107.675	597.033	107.676	597.033	107.677	597.033	119.721	597.156	104.605	597.033	103.359	597.156	104.668	597.033	103.326	597.156	102.133	597.033	102.649	597.156	104.672
597.569	103.774	597.445	112.897	597.569	103.852	597.445	112.903	597.445	110.075	597.445	110.073	597.445	110.073	597.445	110.074	597.445	123.626	597.569	104.199	597.445	105.564	597.569	104.283	597.445	105.557	597.569	101.065	597.445	104.724	597.569	104.288
597.981	105.568	597.857	111.897	597.981	105.637	597.857	111.903	597.857	109.606	597.857	109.604	597.857	109.604	597.857	109.605	597.857	121.959	597.981	106.173	597.857	105.245	597.981	106.24	597.857	105.217	597.981	103.569	597.857	104.513	597.981	106.245
598.393	101.552	598.269	111.127	598.393	101.632	598.269	111.133	598.269	108.134	598.269	108.133	598.269	108.132	598.269	108.133	598.269	122.028	598.393	101.928	598.269	103.582	598.393	102.016	598.269	103.582	598.393	98.6581	598.269	102.703	598.393	102.021
598.805	106.505	598.682	113.233	598.805	106.577	598.682	113.239	598.682	110.823	598.682	110.821	598.682	110.821	598.682	110.823	598.682	123.464	598.805	107.073	598.682	106.426	598.805	107.144	598.682	106.402	598.805	104.359	598.682	105.671	598.805	107.149
599.217	99.1674	599.094	108.676	599.217	99.2457	599.094	108.683	599.094	105.484	599.094	105.482	599.094	105.481	599.094	105.482	599.094	119.755	599.217	99.5443	599.094	100.892	599.217	99.631	599.094	100.902	599.217	96.3296	599.094	99.9677	599.217	99.6356
599.629	106.871	599.506	113.947	599.629	106.945	599.506	113.953	599.506	111.426	599.506	111.424	599.506	111.424	599.506	111.426	599.506	124.325	599.629	107.406	599.506	106.997	599.629	107.48	599.506	106.977	599.629	104.591	599.506	106.22	599.629	107.485
600.041	98.6702	599.918	106.085	600.041	98.7417	599.918	106.091	599.918	102.885	599.918	102.882	599.918	102.882	599.918	102.882	599.918	117.136	600.041	99.1939	599.918	98.3393	600.041	99.266	599.918	98.349	600.041	96.4476	599.918	97.42	600.041	99.2706
600.453	106.712	600.33	114.107	600.453	106.787	600.33	114.113	600.33	111.476	600.33	111.475	600.33	111.474	600.33	111.475	600.33	124.623	600.453	107.213	600.33	107.016	600.453	107.29	600.33	107	600.453	104.299	600.33	106.216	600.453	107.295
600.865	100.709	600.742	105.642	600.865	100.778	600.742	105.649	600.742	103.006	600.742	103.004	600.742	103.005	600.742	103.005	600.742	116.065	600.865	101.324	600.742	98.6327	600.865	101.389	600.742	98.6183	600.865	98.788	600.742	97.8411	600.865	101.393
601.278	106.028	601.154	113.734	601.278	106.104	601.154	113.741	601.154	110.985	601.154	110.983	601.154	110.983	601.154	110.984	601.154	124.391	601.278	106.492	601.154	106.491	601.278	106.573	601.154	106.48	601.278	103.47	601.154	105.667	601.278	106.578
601.69	103.045	601.566	107.778	601.69	103.114	601.566	107.785	601.566	105.438	601.566	105.436	601.566	105.437	601.566	105.437	601.566	117.838	601.69	103.651	601.566	101.103	601.69	103.717	601.566	101.077	601.69	101.064	601.566	100.363	601.69	103.722
602.102	104.79	601.978	112.808	602.102	104.868	601.978	112.814	601.978	109.918	601.978	109.916	601.978	109.916	601.978	109.917	601.978	123.622	602.102	105.212	601.978	105.385	602.102	105.297	601.978	105.38	602.102	102.062	601.978	104.531	602.102	105.302
602.514	104.783	602.39	110.04	602.514	104.854	602.39	110.046	602.39	107.665	602.39	107.663	602.39	107.663	602.39	107.664	602.39	120.174	602.514	105.358	602.39	103.298	602.514	105.428	602.39	103.273	602.514	102.675	602.39	102.549	602.514	105.433
602.926	102.96	602.802	111.251	602.926	103.04	602.802	111.257	602.802	108.178	602.802	108.176	602.802	108.175	602.802	108.176	602.802	122.259	602.926	103.331	602.802	103.594	602.926	103.42	602.802	103.598	602.926	100.026	602.802	102.699	602.926	103.424
603.338	105.883	603.214	111.638	603.338	105.956	603.214	111.645	603.214	109.16	603.214	109.159	603.214	109.159	603.214	109.16	603.214	121.926	603.338	106.428	603.214	104.756	603.338	106.501	603.214	104.735	603.338	103.647	603.214	103.986	603.338	106.506
603.75	100.679	603.626	108.951	603.75	100.76	603.626	108.957	603.626	105.614	603.626	105.612	603.626	105.611	603.626	105.613	603.626	120.208	603.75	101.001	603.626	100.963	603.75	101.094	603.626	100.978	603.75	97.5622	603.626	100.005	603.75	101.099
604.162	106.415	604.038	112.566	604.162	106.489	604.038	112.573	604.038	109.976	604.038	109.974	604.038	109.974	604.038	109.975	604.038	123.007	604.162	106.928	604.038	105.535	604.162	107.005	604.038	105.518	604.162	104.054	604.038	104.743	604.162	107.009
604.574	98.9281	604.45	105.922	604.574	99.0072	604.45	105.928	604.45	102.259	604.45	102.256	604.45	102.255	604.45	102.256	604.45	117.445	604.574	99.2815	604.45	97.5463	604.574	99.3702	604.45	97.5783	604.574	95.9948	604.45	96.5083	604.574	99.3749
604.987	106.425	604.862	112.895	604.987	106.501	604.862	112.901	604.862	110.188	604.862	110.186	604.862	110.186	604.862	110.187	604.862	123.486	604.987	106.907	604.862	105.711	604.987	106.986	604.862	105.699	604.987	103.936	604.862	104.895	604.987	106.991
605.399	99.4328	605.274	103.536	605.399	99.5066	605.274	103.542	605.274	100.122	605.274	100.12	605.274	100.12	605.274	100.12	605.274	114.821	605.399	99.9186	605.274	95.5798	605.399	99.995	605.274	95.5964	605.399	97.0383	605.274	94.6302	605.399	99.9997
605.811	105.926	605.686	112.661	605.811	106.004	605.686	112.668	605.686	109.824	605.686	109.822	605.686	109.822	605.686	109.823	605.686	123.409	605.811	106.373	605.686	105.309	605.811	106.456	605.686	105.302	605.811	103.296	605.686	104.465	605.811	106.461
606.223	101.417	606.098	104.697	606.223	101.489	606.098	104.703	606.098	102.112	606.098	102.109	606.098	102.11	606.098	102.111	606.098	115.071	606.223	101.96	606.098	97.7698	606.223	102.032	606.098	97.7528	606.223	99.2126	606.098	96.9937	606.223	102.037
606.635	104.895	606.51	111.849	606.635	104.974	606.51	111.856	606.51	108.854	606.51	108.853	606.51	108.852	606.51	108.853	606.51	122.776	606.635	105.3	606.51	104.293	606.635	105.387	606.51	104.292	606.635	102.094	606.51	103.415	606.635	105.392
607.047	103.265	606.922	107.302	607.047	103.337	606.922	107.309	606.922	104.872	606.922	104.87	606.922	104.871	606.922	104.871	606.922	117.473	607.047	103.803	606.922	100.521	607.047	103.876	606.922	100.498	607.047	101.019	606.922	99.7641	607.047	103.881
607.459	103.284	607.334	110.381	607.459	103.365	607.334	110.388	607.334	107.172	607.334	107.17	607.334	107.169	607.334	107.171	607.334	121.535	607.459	103.635	607.334	102.548	607.459	103.727	607.334	102.557	607.459	100.26	607.334	101.621	607.459	103.731
607.871	104.542	607.746	109.288	607.871	104.615	607.746	109.295	607.746	106.772	607.746	106.771	607.746	106.771	607.746	106.772	607.746	119.586	607.871	105.056	607.746	102.377	607.871	105.132	607.746	102.358	607.871	102.195	607.746	101.6	607.871	105.137
608.284	101.08	608.158	108.083	608.284	101.165	608.158	108.089	608.158	104.538	608.158	104.536	608.158	104.535	608.158	104.536	608.158	119.56	608.284	101.361	608.158	99.816	608.284	101.459	608.158	99.8398	608.284	97.7653	608.158	98.8075	608.284	101.463
608.696	105.239	608.57	110.476	608.696	105.314	608.57	110.482	608.57	107.834	608.57	107.832	608.57	107.832	608.57	107.833	608.57	120.945	608.696	105.725	608.57	103.393	608.696	105.804	608.57	103.379	608.696	102.773	608.57	102.59	608.696	105.809
609.108	98.6637	608.982	104.663	609.108	98.749	608.982	104.669	608.982	100.51	608.982	100.507	608.982	100.505	608.982	100.507	608.982	116.642	609.108	98.8873	608.982	95.6191	609.108	98.9898	608.982	95.6753	609.108	95.1414	608.982	94.446	609.108	98.9944
609.52	105.395	609.394	110.963	609.52	105.472	609.394	110.97	609.394	108.181	609.394	108.18	609.394	108.179	609.394	108.18	609.394	121.609	609.52	105.85	609.394	103.696	609.52	105.932	609.394	103.688	609.52	102.8	609.394	102.864	609.52	105.937
609.932	97.6316	609.806	100.39	609.932	97.7129	609.806	100.395	609.806	95.7111	609.806	95.7062	609.806	95.7057	609.806	95.7054	609.806	112.803	609.932	97.9411	609.806	90.8702	609.932	98.0337	609.806	90.945	609.932	94.5469	609.806	89.6281	609.932	98.0383
610.344	105.026	610.218	110.81	610.344	105.105	610.218	110.817	610.218	107.868	610.218	107.866	610.218	107.866	610.218	107.867	610.218	121.646	610.344	105.445	610.218	103.334	610.344	105.53	610.218	103.332	610.344	102.281	610.218	102.467	610.344	105.535
610.756	98.9859	610.63	100.328	610.756	99.0613	610.63	100.335	610.63	97.7073	610.63	97.7046	610.63	97.7069	610.63	97.7058	610.63	111.033	610.756	99.436	610.63	93.505	610.756	99.5155	610.63	93.4804	610.756	96.4566	610.63	92.7834	610.756	99.5201
611.168	104.113	611.042	110.008	611.168	104.194	611.042	110.014	611.042	106.864	611.042	106.862	611.042	106.861	611.042	106.863	611.042	121.068	611.168	104.487	611.042	102.27	611.168	104.577	611.042	102.276	611.168	101.183	611.042	101.357	611.168	104.582
611.58	100.953	611.454	103.951	611.58	101.027	611.454	103.958	611.454	101.75	611.454	101.747	611.454	101.748	611.454	101.749	611.454	113.852	611.58	101.443	611.454	97.5078	611.58	101.52	611.454	97.4763	611.58	98.5432	611.454	96.8081	611.58	101.525
611.993	102.593	611.867	108.454	611.993	102.676	611.867	108.461	611.867	105.021	611.867	105.019	611.867	105.018	611.867	105.019	611.867	119.811	611.993	102.906	611.867	100.339	611.993	103.002	611.867	100.359	611.993	99.407	611.867	99.3579	611.993	103.006
612.405	102.451	612.279	106.574	612.405	102.525	612.279	106.581	612.279	104.214	612.279	104.212	612.279	104.213	612.279	104.214	612.279	116.653	612.405	102.93	612.279	99.8888	612.405	103.009	612.279	99.8635	612.405	99.979	612.279	99.1473	612.405	103.013
612.817	100.368	612.691	105.889	612.817	100.455	612.691	105.895	612.691	101.955	612.691	101.953	612.691	101.951	612.691	101.953	612.691	117.703	612.817	100.591	612.691	97.1196	612.817	100.696	612.691	97.1627	612.817	96.7965	612.691	96.0087	612.817	100.7
613.229	103.324	613.103	108.059	613.229	103.4	613.103	108.065	613.103	105.506	613.103	105.504	613.103	105.504	613.103	105.505	613.103	118.388	613.229	103.777	613.103	101.114	613.229	103.858	613.103	101.096	613.229	100.736	613.103	100.331	613.229	103.863
613.641	97.4679	613.515	101.665	613.641	97.56	613.515	101.671	613.515	96.5744	613.515	96.5706	613.515	96.5678	613.515	96.5696	613.515	114.344	613.641	97.5628	613.515	91.3708	613.641	97.6789	613.515	91.4802	613.641	93.3429	613.515	89.9004	613.641	97.6835
614.053	103.599	613.927	108.658	614.053	103.677	613.927	108.664	613.927	105.91	613.927	105.908	613.927	105.908	613.927	105.909	613.927	119.226	614.053	104.019	613.927	101.458	614.053	104.104	613.927	101.449	614.053	100.867	613.927	100.634	614.053	104.108
614.465	95.0019	614.339	94.7341	614.465	95.0934	614.339	94.7391	614.339	88.371	614.339	88.3602	614.339	88.3643	614.339	88.3596	614.339	108.912	614.465	95.0712	614.339	83.997	614.465	95.1866	614.339	84.0503	614.465	90.9176	614.339	83.0819	614.465	95.1911
614.877	103.299	614.751	108.49	614.877	103.379	614.751	108.496	614.751	105.527	614.751	105.525	614.751	105.524	614.751	105.525	614.751	119.306	614.877	103.677	614.751	101.013	614.877	103.766	614.751	101.013	614.877	100.391	614.751	100.142	614.877	103.771
615.289	95.6035	615.163	96.8122	615.289	95.683	615.163	96.8197	615.163	96.0445	615.163	96.0434	615.163	96.0472	615.163	96.0462	615.163	105.613	615.289	95.9352	615.163	92.2733	615.289	96.0238	615.163	92.1849	615.289	92.7209	615.163	91.8699	615.289	96.0283
615.702	102.4	615.575	107.544	615.702	102.483	615.575	107.55	615.575	104.305	615.575	104.303	615.575	104.302	615.575	104.303	615.575	118.653	615.702	102.723	615.575	99.7151	615.702	102.818	615.575	99.7265	615.702	99.2605	615.575	98.7809	615.702	102.823
616.114	97.9009	615.987	102.302	616.114	97.9753	615.987	102.309	615.987	100.878	615.987	100.876	615.987	100.878	615.987	100.878	615.987	111.064	616.114	98.3578	615.987	96.8076	616.114	98.4363	615.987	96.749	616.114	95.4312	615.987	96.2418	616.114	98.4409
616.526	100.815	616.399	105.663	616.526	100.902	616.399	105.669	616.399	102.005	616.399	102.002	616.399	102.001	616.399	102.002	616.399	117.175	616.526	101.061	616.399	97.3029	616.526	101.163	616.399	97.3338	616.526	97.3387	616.399	96.2676	616.526	101.167
616.938	99.7511	616.811	105.254	616.938	99.826	616.811	105.26	616.811	103.368	616.811	103.367	616.811	103.368	616.811	103.368	616.811	114.683	616.938	100.213	616.811	99.1603	616.938	100.292	616.811	99.1181	616.938	97.2507	616.811	98.5081	616.938	100.297
617.35	98.3638	617.223	102.403	617.35	98.4553	617.223	102.408	617.223	97.9573	617.223	97.9535	617.223	97.9511	617.223	97.9521	617.223	114.582	617.35	98.481	617.223	93.0586	617.35	98.5953	617.223	93.1296	617.35	94.3179	617.223	91.8202	617.35	98.5999
617.762	100.826	617.635	106.786	617.762	100.902	617.635	106.793	617.635	104.6	617.635	104.598	617.635	104.599	617.635	104.6	617.635	116.639	617.762	101.259	617.635	100.308	617.762	101.341	617.635	100.277	617.762	98.1843	617.635	99.599	617.762	101.346
618.174	94.7888	618.047	96.6785	618.174	94.889	618.047	96.6833	618.047	90.9772	618.047	90.9694	618.047	90.9699	618.047	90.9674	618.047	110.105	618.174	94.6732	618.047	86.2666	618.174	94.8092	618.047	86.3529	618.174	89.6601	618.047	85.0661	618.174	94.8138
618.586	101.183	618.459	107.357	618.586	101.262	618.459	107.364	618.459	104.935	618.459	104.933	618.459	104.934	618.459	104.934	618.459	117.518	618.586	101.573	618.459	100.583	618.586	101.66	618.459	100.56	618.586	98.3544	618.459	99.8276	618.586	101.665
618.999	90.927	618.871	93.707	618.999	91.0302	618.871	93.7141	618.871	93.8297	618.871	93.8281	618.871	93.8332	618.871	93.8308	618.871	103.023	618.999	90.6738	618.871	90.3206	618.999	90.8169	618.871	90.201	618.999	85.7456	618.871	90.0804	618.999	90.8213
619.411	100.862	619.283	107.125	619.411	100.943	619.283	107.132	619.283	104.488	619.283	104.486	619.283	104.486	619.283	104.487	619.283	117.55	619.411	101.196	619.283	100.085	619.411	101.289	619.283	100.072	619.411	97.7956	619.283	99.2871	619.411	101.293
619.823	91.9207	619.695	100.275	619.823	91.9945	619.695	100.283	619.695	99.6533	619.695	99.6519	619.695	99.655	619.695	99.6541	619.695	107.512	619.823	92.3386	619.695	95.7319	619.823	92.4133	619.695	95.649	619.823	89.7387	619.695	95.284	619.823	92.4178
620.235	99.8319	620.107	106.111	620.235	99.9164	620.107	106.117	620.107	103.254	620.107	103.252	620.107	103.252	620.107	103.252	620.107	116.786	620.235	100.091	620.107	98.8095	620.235	100.19	620.107	98.8046	620.235	96.4393	620.107	97.9682	620.235	100.195
620.647	95.2697	620.519	104.211	620.647	95.3362	620.519	104.218	620.519	102.881	620.519	102.879	620.519	102.881	620.519	102.881	620.519	112.769	620.647	95.8515	620.519	98.7772	620.647	95.9154	620.519	98.7167	620.647	93.397	620.519	98.2161	620.647	95.92
621.059	97.9592	620.931	104.24	621.059	98.049	620.931	104.246	620.931	101.179	620.931	101.177	620.931	101.177	620.931	101.178	620.931	115.154	621.059	98.1011	620.931	96.7211	621.059	98.2121	620.931	96.7226	621.059	94.056	620.931	95.8469	621.059	98.2166
621.471	97.5496	621.343	106.453	621.471	97.6198	621.343	106.461	621.343	104.734	621.343	104.733	621.343	104.734	621.343	104.735	621.343	115.654	621.471	98.1028	621.343	100.535	621.471	98.172	621.343	100.487	621.471	95.4673	621.343	99.9081	621.471	98.1766
621.883	94.9478	621.755	101.57	621.883	95.0453	621.755	101.576	621.755	98.5946	621.755	98.5915	621.755	98.5917	621.755	98.5921	621.755	112.519	621.883	94.885	621.755	94.251	621.883	95.0154	621.755	94.2457	621.883	90.1251	621.755	93.4336	621.883	95.0199
622.295	98.7695	622.167	107.672	622.295	98.8419	622.167	107.679	622.167	105.702	622.167	105.701	622.167	105.701	622.167	105.702	622.167	117.248	622.295	99.2702	622.167	101.442	622.295	99.345	622.167	101.403	622.295	96.4466	622.167	100.77	622.295	99.3497
622.708	90.5169	622.579	99.6333	622.708	90.6237	622.579	99.6394	622.579	97.8003	622.579	97.7983	622.579	97.8013	622.579	97.7994	622.579	109.419	622.708	90.1553	622.579	93.7645	622.708	90.3083	622.579	93.7123	622.708	84.7593	622.579	93.1775	622.708	90.3126
623.12	99.144	622.991	108.151	623.12	99.2195	622.991	108.157	622.991	105.997	622.991	105.996	622.991	105.996	622.991	105.997	622.991	117.978	623.12	99.5876	622.991	101.695	623.12	99.6681	622.991	101.662	623.12	96.5812	622.991	100.989	623.12	99.6728
623.532	88.5344	623.403	101.349	623.532	88.6039	623.403	101.356	623.403	100.212	623.403	100.211	623.403	100.213	623.403	100.213	623.403	109.634	623.532	88.9831	623.403	96.204	623.532	89.0454	623.403	96.136	623.532	87.0948	623.403	95.6842	623.532	89.0499
623.944	98.7701	623.815	108.023	623.944	98.8481	623.815	108.03	623.815	105.729	623.815	105.728	623.815	105.728	623.815	105.729	623.815	118.029	623.944	99.1502	623.815	101.398	623.944	99.2367	623.815	101.37	623.944	95.9516	623.815	100.666	623.944	99.2413
624.356	92.5727	624.227	104.349	624.356	92.6277	624.227	104.356	624.227	102.982	624.227	102.981	624.227	102.982	624.227	102.983	624.227	112.969	624.356	93.4354	624.227	98.8706	624.356	93.4709	624.227	98.8105	624.356	91.8084	624.227	98.3036	624.356	93.4756
624.768	97.6524	624.639	107.379	624.768	97.7339	624.639	107.385	624.639	104.99	624.639	104.988	624.639	104.988	624.639	104.989	624.639	117.5	624.768	97.9587	624.639	100.644	624.768	98.052	624.639	100.621	624.768	94.549	624.639	99.8948	624.768	98.0566
625.18	95.8812	625.052	106.686	625.18	95.9405	625.052	106.693	625.052	105.034	625.052	105.032	625.052	105.034	625.052	105.034	625.052	115.801	625.18	96.6607	625.052	100.841	625.18	96.7082	625.052	100.791	625.18	94.6593	625.052	100.225	625.18	96.7129
625.592	95.7699	625.464	106.366	625.592	95.8539	625.464	106.373	625.464	103.962	625.464	103.96	625.464	103.961	625.464	103.961	625.464	116.501	625.592	95.9978	625.464	99.6277	625.592	96.097	625.464	99.6045	625.592	92.4081	625.464	98.878	625.592	96.1015
626.005	97.8721	625.876	108.252	626.005	97.9354	625.876	108.259	625.876	106.384	625.876	106.382	625.876	106.383	625.876	106.384	625.876	117.707	626.005	98.5661	625.876	102.135	626.005	98.6225	625.876	102.092	626.005	96.2916	625.876	101.481	626.005	98.6273
626.417	93.3867	626.288	105.359	626.417	93.469	626.288	105.366	626.288	103.088	626.288	103.086	626.288	103.087	626.288	103.087	626.288	115.325	626.417	93.6172	626.288	98.8003	626.417	93.7132	626.288	98.7716	626.417	90.2552	626.288	98.0794	626.417	93.7177
626.829	98.932	626.7	109.19	626.829	98.9991	626.7	109.196	626.7	107.159	626.7	107.157	626.7	107.158	626.7	107.159	626.7	118.88	626.829	99.5607	626.7	102.87	626.829	99.6236	626.7	102.832	626.829	97.0903	626.7	102.186	626.829	99.6283
627.241	92.1837	627.112	105.048	627.241	92.2517	627.112	105.055	627.112	103.033	627.112	103.032	627.112	103.033	627.112	103.033	627.112	114.665	627.241	92.7328	627.112	98.8028	627.241	92.7958	627.112	98.7648	627.241	90.4403	627.112	98.129	627.241	92.8004
627.653	99.2927	627.524	109.618	627.653	99.3621	627.524	109.625	627.524	107.461	627.524	107.459	627.524	107.46	627.524	107.461	627.524	119.479	627.653	99.8703	627.524	103.142	627.653	99.9382	627.524	103.109	627.653	97.2524	627.524	102.435	627.653	99.9429
628.065	93.8781	627.936	105.824	628.065	93.9349	627.936	105.831	627.936	103.969	627.936	103.967	627.936	103.968	627.936	103.969	627.936	115.214	628.065	94.6922	627.936	99.754	628.065	94.7343	627.936	99.7107	628.065	92.8701	627.936	99.1047	628.065	94.739
628.477	99.091	628.348	109.628	628.477	99.1616	628.348	109.635	628.348	107.374	628.348	107.373	628.348	107.373	628.348	107.374	628.348	119.612	628.477	99.6288	628.348	103.034	628.477	99.6999	628.348	103.005	628.477	96.9037	628.348	102.308	628.477	99.7046
628.889	96.3983	628.76	107.196	628.889	96.4567	628.76	107.203	628.76	105.323	628.76	105.321	628.76	105.322	628.76	105.323	628.76	116.63	628.889	97.2091	628.76	101.085	628.889	97.2548	628.76	101.042	628.889	95.2571	628.76	100.431	628.889	97.2595
629.301	98.462	629.172	109.319	629.301	98.5336	629.172	109.326	629.172	106.998	629.172	106.996	629.172	106.996	629.172	106.997	629.172	119.382	629.301	98.9769	629.172	102.645	629.301	99.0501	629.172	102.619	629.301	96.2014	629.172	101.906	629.301	99.0548
629.714	98.3858	629.584	108.541	629.714	98.4478	629.584	108.548	629.584	106.572	629.584	106.571	629.584	106.572	629.584	106.573	629.584	118.136	629.714	99.1376	629.584	102.302	629.714	99.1897	629.584	102.262	629.714	96.9893	629.584	101.629	629.714	99.1945
630.126	97.6495	629.996	108.831	630.126	97.7206	629.996	108.837	629.996	106.482	629.996	106.48	629.996	106.48	629.996	106.481	629.996	118.92	630.126	98.1732	629.996	102.127	630.126	98.2449	629.996	102.102	630.126	95.4476	629.996	101.384	630.126	98.2495
630.538	99.7192	630.408	109.588	630.538	99.7835	630.408	109.595	630.408	107.511	630.408	107.51	630.408	107.51	630.408	107.511	630.408	119.348	630.538	100.416	630.408	103.209	630.538	100.473	630.408	103.173	630.538	98.1048	630.408	102.517	630.538	100.478
630.95	97.1148	630.82	108.381	630.95	97.1837	630.82	108.387	630.82	106.053	630.82	106.051	630.82	106.052	630.82	106.052	630.82	118.437	630.95	97.6937	630.82	101.708	630.95	97.7601	630.82	101.682	630.95	95.141	630.82	100.969	630.95	97.7648
631.362	100.499	631.232	110.278	631.362	100.566	631.232	110.284	631.232	108.101	631.232	108.099	631.232	108.1	631.232	108.1	631.232	120.179	631.362	101.152	631.232	103.771	631.362	101.213	631.232	103.739	631.362	98.7138	631.232	103.06	631.362	101.218
631.774	97.3481	631.644	108.227	631.774	97.4138	631.644	108.234	631.644	105.956	631.644	105.955	631.644	105.955	631.644	105.956	631.644	118.208	631.774	98.0016	631.644	101.626	631.774	98.0613	631.644	101.597	631.774	95.6365	631.644	100.898	631.774	98.066
632.186	100.836	632.056	110.628	632.186	100.904	632.056	110.635	632.056	108.365	632.056	108.363	632.056	108.364	632.056	108.364	632.056	120.646	632.186	101.454	632.056	104.013	632.186	101.519	632.056	103.984	632.186	98.92	632.056	103.286	632.186	101.524
632.598	98.3103	632.468	108.501	632.598	98.3743	632.468	108.508	632.468	106.281	632.468	106.279	632.468	106.28	632.468	106.28	632.468	118.423	632.598	99.0012	632.468	101.958	632.598	99.0583	632.468	101.928	632.598	96.7053	632.468	101.24	632.598	99.063
633.01	100.842	632.88	110.692	633.01	100.912	632.88	110.699	632.88	108.356	632.88	108.354	632.88	108.354	632.88	108.355	632.88	120.801	633.01	101.437	632.88	103.987	633.01	101.503	632.88	103.961	633.01	98.8352	632.88	103.245	633.01	101.508
633.423	99.5152	633.292	109.096	633.423	99.5802	633.292	109.103	633.292	106.885	633.292	106.884	633.292	106.884	633.292	106.885	633.292	119.016	633.423	100.203	633.292	102.559	633.423	100.262	633.292	102.528	633.423	97.8731	633.292	101.841	633.423	100.266
633.835	100.654	633.704	110.541	633.835	100.723	633.704	110.548	633.704	108.148	633.704	108.146	633.704	108.147	633.704	108.148	633.704	120.717	633.835	101.234	633.704	103.767	633.835	101.303	633.704	103.743	633.835	98.5987	633.704	103.014	633.835	101.307
634.247	100.587	634.116	109.781	634.247	100.654	634.116	109.788	634.116	107.54	634.116	107.539	634.116	107.54	634.116	107.54	634.116	119.752	634.247	101.253	634.116	103.201	634.247	101.314	634.116	103.171	634.247	98.8487	634.116	102.478	634.247	101.319
634.659	100.445	634.528	110.279	634.659	100.515	634.528	110.285	634.528	107.848	634.528	107.847	634.528	107.847	634.528	107.848	634.528	120.495	634.659	101.025	634.528	103.46	634.659	101.094	634.528	103.438	634.659	98.3907	634.528	102.7	634.659	101.098
635.071	101.382	634.94	110.373	635.071	101.45	634.94	110.38	634.94	108.081	634.94	108.08	634.94	108.08	634.94	108.081	634.94	120.421	635.071	102.022	634.94	103.725	635.071	102.086	634.94	103.697	635.071	99.5376	634.94	102.992	635.071	102.09
635.483	100.409	635.352	110.032	635.483	100.478	635.352	110.038	635.352	107.587	635.352	107.585	635.352	107.585	635.352	107.586	635.352	120.263	635.483	100.999	635.352	103.197	635.483	101.066	635.352	103.175	635.483	98.3905	635.352	102.434	635.483	101.07
635.895	101.883	635.764	110.779	635.895	101.952	635.764	110.785	635.764	108.427	635.764	108.426	635.764	108.426	635.764	108.427	635.764	120.907	635.895	102.499	635.764	104.054	635.895	102.564	635.764	104.028	635.895	99.9414	635.764	103.31	635.895	102.569
636.307	100.649	636.176	109.919	636.307	100.718	636.176	109.925	636.176	107.474	636.176	107.473	636.176	107.473	636.176	107.474	636.176	120.147	636.307	101.249	636.176	103.085	636.307	101.316	636.176	103.064	636.307	98.6678	636.176	102.323	636.307	101.32
636.72	102.13	636.588	110.975	636.72	102.199	636.588	110.981	636.588	108.565	636.588	108.563	636.588	108.563	636.588	108.564	636.588	121.18	636.72	102.724	636.588	104.176	636.72	102.792	636.588	104.152	636.72	100.107	636.588	103.42	636.72	102.796
637.132	101.118	637	109.993	637.132	101.187	637	109.999	637	107.552	637	107.55	637	107.55	637	107.551	637	120.219	637.132	101.723	637	103.163	637.132	101.789	637	103.141	637.132	99.1462	637	102.401	637.132	101.794
637.544	102.198	637.412	110.985	637.544	102.268	637.412	110.992	637.412	108.522	637.412	108.52	637.412	108.52	637.412	108.521	637.412	121.257	637.544	102.776	637.412	104.119	637.544	102.845	637.412	104.098	637.544	100.113	637.412	103.353	637.544	102.85
637.956	101.668	637.824	110.209	637.956	101.738	637.824	110.216	637.824	107.761	637.824	107.759	637.824	107.759	637.824	107.76	637.824	120.448	637.956	102.269	637.824	103.368	637.956	102.336	637.824	103.346	637.956	99.6714	637.824	102.605	637.956	102.34
638.368	102.182	638.237	110.864	638.368	102.252	638.237	110.871	638.237	108.356	638.237	108.354	638.237	108.354	638.237	108.355	638.237	121.189	638.368	102.75	638.237	103.943	638.368	102.82	638.237	103.923	638.368	100.057	638.237	103.167	638.368	102.824
638.78	102.162	638.649	110.469	638.78	102.232	638.649	110.476	638.649	107.998	638.649	107.997	638.649	107.997	638.649	107.998	638.649	120.741	638.78	102.75	638.649	103.598	638.78	102.819	638.649	103.577	638.78	100.116	638.649	102.83	638.78	102.824
639.192	102.189	639.061	110.69	639.192	102.26	639.061	110.697	639.061	108.148	639.061	108.147	639.061	108.147	639.061	108.148	639.061	121.053	639.192	102.751	639.061	103.728	639.192	102.822	639.061	103.71	639.192	100.042	639.061	102.945	639.192	102.827
639.604	102.514	639.473	110.67	639.604	102.585	639.473	110.677	639.473	108.163	639.473	108.162	639.473	108.162	639.473	108.163	639.473	120.989	639.604	103.088	639.473	103.752	639.604	103.158	639.473	103.733	639.604	100.411	639.473	102.977	639.604	103.163
640.016	102.294	639.885	110.548	640.016	102.366	639.885	110.554	639.885	107.983	639.885	107.981	639.885	107.981	639.885	107.982	639.885	120.935	640.016	102.854	639.885	103.558	640.016	102.925	639.885	103.54	640.016	100.135	639.885	102.77	640.016	102.929
640.429	102.705	640.297	110.75	640.429	102.776	640.297	110.756	640.297	108.2	640.297	108.199	640.297	108.198	640.297	108.2	640.297	121.122	640.429	103.265	640.297	103.777	640.429	103.337	640.297	103.759	640.429	100.545	640.297	102.993	640.429	103.341
640.841	102.508	640.709	110.491	640.841	102.58	640.709	110.498	640.709	107.909	640.709	107.907	640.709	107.907	640.709	107.908	640.709	120.899	640.841	103.064	640.709	103.48	640.841	103.135	640.709	103.463	640.841	100.332	640.709	102.689	640.841	103.14
641.253	102.762	641.121	110.69	641.253	102.834	641.121	110.697	641.121	108.096	641.121	108.095	641.121	108.094	641.121	108.095	641.121	121.116	641.253	103.31	641.121	103.662	641.253	103.382	641.121	103.646	641.253	100.553	641.121	102.869	641.253	103.387
641.665	102.776	641.533	110.521	641.665	102.848	641.533	110.528	641.533	107.92	641.533	107.918	641.533	107.918	641.533	107.919	641.533	120.952	641.665	103.325	641.533	103.485	641.665	103.398	641.533	103.469	641.665	100.572	641.533	102.69	641.665	103.402
642.077	102.749	641.945	110.518	642.077	102.822	641.945	110.525	641.945	107.884	641.945	107.882	641.945	107.882	641.945	107.883	641.945	120.99	642.077	103.288	641.945	103.44	642.077	103.361	641.945	103.425	642.077	100.505	641.945	102.638	642.077	103.366
642.489	103.015	642.357	110.583	642.489	103.088	642.357	110.59	642.357	107.955	642.357	107.953	642.357	107.953	642.357	107.954	642.357	121.05	642.489	103.554	642.357	103.512	642.489	103.627	642.357	103.497	642.489	100.769	642.357	102.711	642.489	103.632
642.901	102.752	642.769	110.297	642.901	102.824	642.769	110.303	642.769	107.631	642.769	107.629	642.769	107.629	642.769	107.63	642.769	120.802	642.901	103.285	642.769	103.18	642.901	103.358	642.769	103.167	642.901	100.485	642.769	102.372	642.901	103.363
643.313	103.152	643.181	110.599	643.313	103.225	643.181	110.606	643.181	107.931	643.181	107.929	643.181	107.929	643.181	107.93	643.181	121.114	643.313	103.678	643.181	103.477	643.313	103.752	643.181	103.464	643.313	100.854	643.181	102.669	643.313	103.757
643.726	102.838	643.593	110.107	643.726	102.91	643.593	110.114	643.593	107.421	643.593	107.42	643.593	107.419	643.593	107.42	643.593	120.634	643.726	103.367	643.593	102.967	643.726	103.441	643.593	102.954	643.726	100.556	643.593	102.154	643.726	103.446
644.138	103.146	644.005	110.498	644.138	103.219	644.005	110.505	644.005	107.781	644.005	107.779	644.005	107.779	644.005	107.78	644.005	121.071	644.138	103.658	644.005	103.314	644.138	103.733	644.005	103.303	644.138	100.792	644.005	102.495	644.138	103.738
644.55	103.028	644.417	110.021	644.55	103.101	644.417	110.028	644.417	107.323	644.417	107.321	644.417	107.321	644.417	107.322	644.417	120.561	644.55	103.554	644.417	102.865	644.55	103.628	644.417	102.854	644.55	100.729	644.417	102.051	644.55	103.633
644.962	102.998	644.829	110.24	644.962	103.072	644.829	110.246	644.829	107.466	644.829	107.464	644.829	107.464	644.829	107.465	644.829	120.875	644.962	103.496	644.829	102.985	644.962	103.573	644.829	102.976	644.962	100.592	644.829	102.154	644.962	103.578
645.374	103.28	645.241	110.052	645.374	103.354	645.241	110.059	645.241	107.34	645.241	107.338	645.241	107.338	645.241	107.339	645.241	120.61	645.374	103.799	645.241	102.879	645.374	103.874	645.241	102.867	645.374	100.952	645.241	102.061	645.374	103.879
645.786	102.755	645.653	109.823	645.786	102.83	645.653	109.829	645.653	106.992	645.653	106.99	645.653	106.99	645.653	106.991	645.653	120.518	645.786	103.243	645.653	102.498	645.786	103.321	645.653	102.492	645.786	100.308	645.653	101.655	645.786	103.326
646.198	103.509	646.065	110.144	646.198	103.583	646.065	110.15	646.065	107.406	646.065	107.404	646.065	107.404	646.065	107.405	646.065	120.734	646.198	104.017	646.065	102.936	646.198	104.093	646.065	102.926	646.198	101.136	646.065	102.113	646.198	104.098
[truncated: 3,286 more rows]
